# Supplementary material for: The Chromatin Remodeling Factor BrCHR39 Targets DNA Methylation to Positively Regulate Apical Dominance in Brassica rapa
Source: MDPI journal article supplement (doi:10.3390/plants12061384), 2023-03-20
Supplement: s1 [file s1]

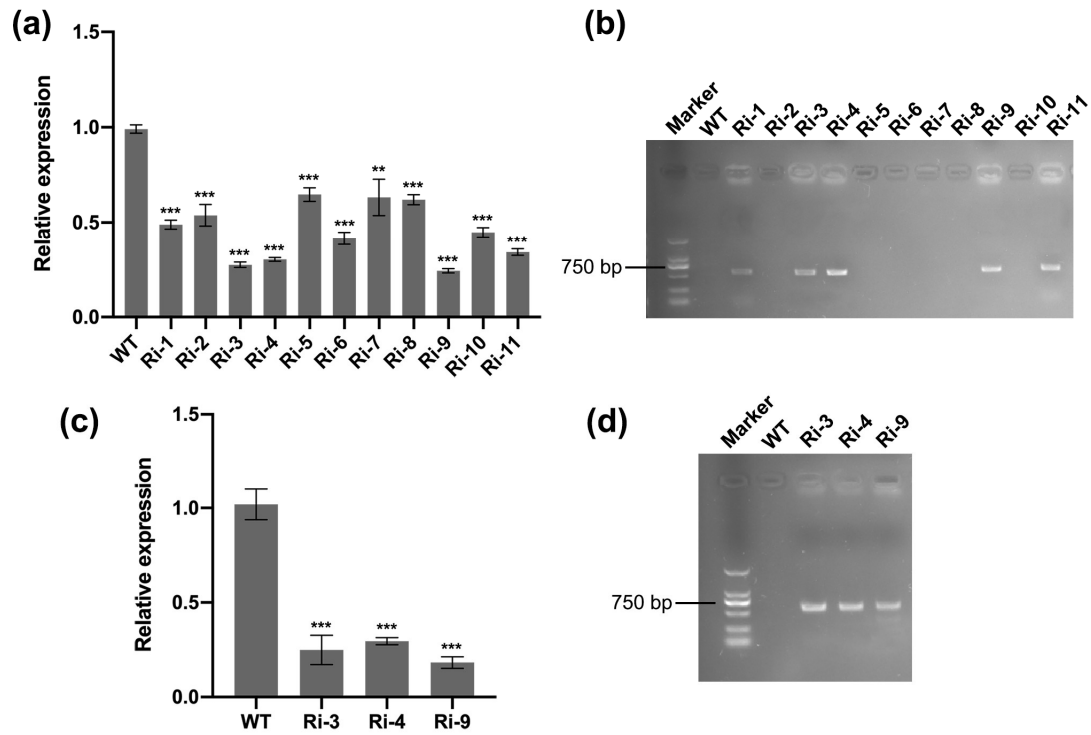

**Figure S1. Screening and identification of the T<sub>1</sub> and T<sub>2</sub> transgenic lines.**

(a) Relative expression of *BrCHR39* gene in T<sub>1</sub> transgenic plants. (b) Screening of T<sub>1</sub> transgenic plants at DNA level. Marker, 2000 bp. (c) Relative expression of *BrCHR39* gene in selected T<sub>2</sub> transgenic plants. (d) Screening of T<sub>2</sub> transgenic plants at DNA level. Marker, 2000 bp; All values are presented as the means of three replicates  $\pm$  standard deviation (SD). Significant differences are determined by Student's *t*-test (\*\* $p < 0.01$ ; \*\*\* $p < 0.001$ ).
