# Supplementary material for: The Chromatin Remodeling Factor BrCHR39 Targets DNA Methylation to Positively Regulate Apical Dominance in Brassica rapa
Source: Plants (Basel). 2023 Mar 20;12(6):1384. doi: 10.3390/plants12061384 (PMC10051476; doi:10.3390/plants12061384)
Supplement: Supplementary file 1 [file plants-12-01384-s001.zip]

Archive with 4 entries (4 files):
- __MACOSX/._Supplementary figure.docx
- Supplementary table.xlsx
- __MACOSX/._Supplementary table.xlsx
- Supplementary figure.pdf
