# Supplementary material for: The Chromatin Remodeling Factor BrCHR39 Targets DNA Methylation to Positively Regulate Apical Dominance in Brassica rapa
Source: Plants (Basel). 2023 Mar 20;12(6):1384. doi: 10.3390/plants12061384 (PMC10051476; doi:10.3390/plants12061384)
Supplement: Supplementary file 1 [file plants-12-01384-s001.zip › Supplementary table.xlsx]

## Sheet: Table S1
Table S1. List of primers used in this study.
Primer name	Primer sequence (5' to 3' )	Usage
BrCHR39-RNAi	GGGGACAAGTTTGTACAAAAAAGCAGGCTAGTGCTGAATGGAATCCTCG	Target fragment clone
	GGGGACCACTTTGTACAAGAAAGCTGGGTAAAGCTGGCTATTTGGCGTG
PDK	GACGAAGAAGATAAAAGTTGAGAGT	PCR test
	ACCTTGTTTATTCATGTTCGACTAA
ACTIN7	TGGTGTCATGGTTGGGATGG	Reference gene
	CGTGAGAAGAACAGGGTGCT
BrCHR39-qPCR	CACTGACGCTTGTGCATCTG	qPCR
	ACGCTCCAACATCCAACCAA
ARF1	CGGTCTACGTGGGTGAAGAG	qPCR
	TTGGAGGTCACTTGGAACCG
ARF3	CACGAAGCTGTTTTCCTCCG	qPCR
	TGGCCTGATACTCGTTTGTCC
AAO1	GCTGTTACCTGTCAAGACTGC	qPCR
	GTTTACTTCAACCTCGCTCGC
AUX1	ACTTGATGGACTACTCGGTTCAT	qPCR
	CGGTAGTTATGGAACGACGGT
SAUR15	TACCAAGAGGATTCATGGCGG	qPCR
	AGTATGGTTAAGCCAGTGCCG
SAUR72	CGGTCTACGTGGGTGAAGAG	qPCR
	TTGGAGGTCACTTGGAACCG
GH3.12	ACCAAAGATGGGAGGCGAAG	qPCR
	CTCTCCGTTCACGACACGAT
GH3.17	TGAATAGATACGGCTCCGGTC	qPCR
	GGTCGGTACGTGGATCAGTAAG
ARF8	TCCATCCACCATTTGTCTCTTCT	qPCR
	GTTGAGCGAGATCCAGCCTT
ARF9	TGGCACAATCTTGCATCACC	qPCR
	AAACCGTCTCTGCCTTGGTC
SAUR32	GATCAAAAGGGCACCATCACAA	qPCR
	CAGCCTCTGAAACACCCAACA
SAUR41	CAGATCCACCTTCTCCTTCCG	qPCR
	CTGAGCGGATCTGTCGAGAA
CKI1	GTCTCATTGCATCCCCGGAA	qPCR
	GCCAGCACAAGCCCAATAAC
AHP3	CTTCCAGCGGTTTTCTGGATG	qPCR
	GCACCAACACTTGAGCTACTAC
ARR7	TGAGGATGGAGGTTCCCACC	qPCR
	CTGCAAAGCCCTAGTCCCAC
ARR9	TTATGGCAGCAGAACCGCA	qPCR
	AGAAACTGCATCTGGGTCGT

## Sheet: Table S2
Table S2. GO functional enrichment of the DMGs in s_stem vs. wt_stem.
GO ID	GO Term	GO Function	Genes	p value
GO:0007165	signal transduction	biological_process	BraA09g045610.3C;BraA09g008820.3C;BraA04g018390.3C;BraA07g038140.3C;BraA07g021850.3C;BraA02g024350.3C;BraA01g031140.3C;BraA07g021140.3C;BraA07g038150.3C;BraA01g027260.3C;BraA06g014280.3C;BraA07g028420.3C;BraA08g022230.3C;BraA09g057510.3C;BraA03g031710.3C;BraA09g012040.3C;BraA06g013610.3C;BraA07g028410.3C;BraA05g042430.3C;BraA09g056420.3C;BraA04g005140.3C;BraA05g004610.3C;BraA09g057610.3C;BraA09g0…	9.4e-10
GO:0009733	response to auxin	biological_process	BraA04g030840.3C,BraA02g045830.3C;BraA07g027360.3C;BraA09g009840.3C;BraA02g023530.3C;BraA06g016380.3C;BraA05g018320.3C;BraA07g035760.3C	1.3e-09
GO:0009739	response to gibberellin	biological_process	BraA03g060940.3C;BraA01g001270.3C	3.6e-08
GO:0071555	cell wall organization	biological_process	BraA10g021340.3C;BraA03g013270.3C;BraA05g010140.3C;BraA03g032200.3C;BraA09g024010.3C;BraA02g031290.3C;BraA06g017860.3C;BraA03g062180.3C;BraA02g038580.3C;BraA02g014640.3C;BraA01g023800.3C;BraA01g042480.3C;BraA09g020560.3C;BraA03g017390.3C;BraA08g011580.3C;BraA03g036380.3C;BraA10g002440.3C;BraA05g039950.3C;BraA03g001850.3C;BraA01g037360.3C;BraA06g043090.3C;BraA01g037350.3C;BraA06g031840.3C;BraA05g0…	2.3e-07
GO:0007165	response to growth	biological_process	BraA09g045610.3C;BraA09g008820.3C;BraA04g018390.3C;BraA07g038140.3C;BraA07g021850.3C;BraA02g024350.3C;BraA01g031140.3C;BraA07g021140.3C;BraA07g038150.3C;BraA01g027260.3C;BraA06g014280.3C;BraA07g028420.3C;BraA08g022230.3C;BraA09g057510.3C;BraA03g031710.3C;BraA09g012040.3C;BraA06g013610.3C;BraA07g028410.3C;BraA05g042430.3C;BraA09g056420.3C;BraA04g005140.3C;BraA05g004610.3C;BraA09g057610.3C;BraA09g0…	9e-07
GO:0009809	lignin biosynthesis process	biological_process	BraA06g000400.3C;BraA01g017230.3C	5.8e-05
GO:0001558	regulation of cell growth	biological_process	BraA05g040600.3C;BraA08g018930.3C;BraA01g044820.3C;BraA03g054590.3C;BraA03g037610.3C;BraA03g045720.3C;BraA01g035870.3C;BraA05g030540.3C;BraA04g029130.3C;BraA09g052700.3C;BraA03g057080.3C;BraA01g008940.3C;BraA01g022250.3C	0.0005
GO:0000162	tryptophan biosynthetic process	biological_process	BraA08g025300.3C;BraA09g011320.3C;BraA08g031570.3C;BraA08g031560.3C;BraA07g039050.3C;BraA04g014870.3C;BraA02g042740.3C;BraA02g022810.3C;BraA03g024690.3C;BraA10g012880.3C;BraA08g007500.3C;BraA03g002200.3C;BraA03g053470.3C;BraA03g041700.3C;BraA02g007380.3C;BraA01g017780.3C;BraA07g019650.3C;BraA09g006740.3C;BraA07g030400.3C;BraA07g034260.3C;BraA04g011130.3C;BraA02g042730.3C;BraA09g001590.3C;BraA03g0…	0.008
GO:0000148	1,3-beta-D-glucan synthase complex	cellular_component	BraA02g004600.3C;BraA09g063900.3C;BraA07g006320.3C;BraA05g012120.3C;BraA09g002640.3C;BraA05g038460.3C;BraA09g025290.3C;BraA10g025720.3C;BraA05g012170.3C;BraA05g008500.3C;BraA09g016710.3C;BraA09g010050.3C;BraA06g017530.3C;BraA07g023720.3C;BraA10g005220.3C;BraA10g004390.3C;BraA01g041620.3C;BraA04g017660.3C;BraA09g002650.3C;BraA05g012150.3C;BraA03g033140.3C;BraA05g032510.3C	0.0145722
GO:0003993	acid phosphatase activity	molecular_function	BraA05g007050.3C;BraA08g018620.3C;BraA01g017190.3C;BraA02g036110.3C;BraA09g059970.3C;BraA02g031000.3C;BraA09g011240.3C;BraA08g018630.3C;BraA06g043410.3C;BraA05g029790.3C;BraA08g035080.3C;BraA01g041630.3C;BraA04g019310.3C;BraA05g036550.3C;BraA08g009450.3C;BraA09g043870.3C;BraA09g010460.3C;BraA06g010040.3C;BraA06g026760.3C;BraA03g043130.3C;BraA03g043100.3C;BraA02g012470.3C;BraA08g010990.3C;BraA09g0…	0.0179826
GO:0004565	beta-galactosidase activity	molecular_function	BraA06g027250.3C;BraA03g024900.3C;BraA01g016890.3C;BraA03g059130.3C;BraA02g044310.3C;BraA07g003230.3C;BraA02g024060.3C;BraA01g035750.3C;BraA01g003370.3C;BraA07g023840.3C;BraA05g023370.3C;BraA07g021190.3C;BraA04g023630.3C;BraA07g023580.3C;BraA01g002360.3C;BraA03g043310.3C;BraA07g025600.3C;BraA05g023380.3C;BraA07g012160.3C;BraA02g012650.3C;BraA08g005650.3C;BraA07g018830.3C;BraA05g023360.3C;BraA03g0…	0.0236099
GO:0003964	RNA-directed DNA polymerase activity	molecular_function	BraA09g056330.3C;BraA04g000200.3C;BraA03g064940.3C;BraA04g003950.3C;BraA02g025080.3C;BraA03g031330.3C;BraA04g017390.3C;BraA09g008750.3C;BraA06g043370.3C;BraA02g020520.3C;BraA04g009900.3C;BraA06g026590.3C;BraA09g037380.3C;BraA04g006880.3C;BraA05g012160.3C;BraA06g016470.3C;BraA03g056870.3C;BraA08g030920.3C;BraA06g001000.3C;BraA03g045790.3C;BraA06g010600.3C;BraA07g006480.3C;BraA05g012070.3C;BraA02g0…	0.0324676
GO:0000373	Group II intron splicing	biological_process	BraA01g022190.3C;BraA04g011120.3C;BraA06g021980.3C;BraA07g000800.3C;BraA07g009080.3C;BraA09g039710.3C;BraA03g057990.3C;BraA01g031720.3C;BraA04g027530.3C;BraA02g011950.3C;BraA05g024060.3C;BraA07g034930.3C;BraA01g031710.3C;BraA06g035840.3C;BraA07g005060.3C;BraA03g055220.3C;BraA02g006380.3C	0.0381071
GO:0005576	extracellular region	cellular_component	BraA10g011470.3C;BraA03g054640.3C;BraA07g034440.3C;BraA01g007430.3C;BraA04g000660.3C;BraA04g011460.3C;BraA02g039910.3C;BraA09g030610.3C;BraA08g034730.3C;BraA10g013070.3C;BraA09g011680.3C;BraA07g043120.3C;BraA01g037150.3C;BraA07g004150.3C;BraA08g028990.3C;BraA05g030260.3C;BraA03g010130.3C;BraA04g000220.3C;BraA06g042330.3C;BraA07g004470.3C;BraA10g001240.3C;BraA07g035420.3C;BraA03g011920.3C;BraA03g0…	0.04576
GO:0000059	protein import into nucleus, docking	biological_process	BraA07g017750.3C;BraA03g016880.3C;BraA04g002520.3C;BraA02g008450.3C;BraA02g018880.3C;BraA05g022950.3C;BraA10g011810.3C;BraA03g053790.3C;BraA07g004130.3C;BraA02g030520.3C;BraA07g012990.3C;BraA10g028840.3C;BraA10g022870.3C;BraA03g034080.3C;BraA02g012550.3C;BraA05g041660.3C;BraA09g019640.3C;BraA05g012990.3C;BraA04g022630.3C;BraA10g020600.3C;BraA05g001300.3C;BraA03g007780.3C;BraA09g010730.3C;BraA05g0…	0.0484799
GO:0004650	polygalacturonase activity	molecular_function	BraA04g031410.3C;BraA03g033550.3C;BraA03g037130.3C;BraA04g017520.3C;BraA02g040040.3C;BraA04g003230.3C;BraA07g020700.3C;BraA02g029790.3C;BraA08g031970.3C;BraA03g029480.3C;BraA08g024280.3C;BraA07g041530.3C;BraA07g031670.3C;BraA04g004700.3C;BraA03g023110.3C;BraA04g031430.3C;BraA05g037870.3C;BraA07g022910.3C;BraA09g048090.3C;BraA08g028340.3C;BraA04g012380.3C;BraA05g037880.3C;BraA05g002520.3C;BraA06g0…	0.0512539
GO:0005200	structural constituent of cytoskeleton	molecular_function	BraA03g019620.3C;BraA04g026680.3C;BraA04g005920.3C;BraA10g020620.3C;BraA02g027850.3C;BraA02g012980.3C;BraA08g003230.3C;BraA10g027990.3C;BraA04g029640.3C;BraA02g003190.3C;BraA03g011370.3C;BraA10g017240.3C;BraA05g018560.3C;BraA09g044750.3C;BraA06g023770.3C;BraA07g021440.3C;BraA07g024400.3C;BraA01g025310.3C;BraA05g034800.3C;BraA03g004000.3C;BraA01g034150.3C;BraA03g009230.3C;BraA05g007930.3C;BraA05g0…	0.0557777
GO:0003682	chromatin binding	molecular_function	BraA03g050120.3C;BraA01g030740.3C;BraA07g040440.3C;BraA06g011270.3C;BraA10g026010.3C;BraA07g035220.3C;BraA03g052410.3C;BraA02g022130.3C;BraA02g019370.3C;BraA10g020900.3C;BraA07g017970.3C;BraA03g041210.3C;BraA01g044020.3C;BraA03g003430.3C;BraA07g027170.3C;BraA04g007640.3C;BraA02g004470.3C;BraA09g045500.3C;BraA04g019710.3C;BraA10g023570.3C;BraA03g009090.3C;BraA02g006050.3C;BraA06g024170.3C;BraA10g0…	0.0557777
GO:0004843	thiol-dependent ubiquitin-specific protease activity	molecular_function	BraA03g051950.3C;BraA04g028980.3C;BraA08g022060.3C;BraA05g035030.3C;BraA03g039460.3C;BraA01g006860.3C;BraA03g036410.3C;BraA05g032660.3C;BraA01g015340.3C;BraA08g012650.3C;BraA08g002460.3C;BraA05g026580.3C;BraA05g012830.3C;BraA03g012130.3C;BraA10g029290.3C;BraA07g021720.3C;BraA03g010090.3C;BraA02g003620.3C;BraA10g029340.3C;BraA05g035020.3C;BraA03g056230.3C;BraA01g009140.3C;BraA03g047840.3C;BraA01g0…	0.0559278
GO:0005623	cell	cellular_component	BraA03g060560.3C;BraA02g034120.3C;BraA09g022830.3C;BraA07g033210.3C;BraA06g044100.3C;BraA09g043620.3C;BraA08g016200.3C;BraA08g024840.3C;BraA09g046300.3C;BraA01g001650.3C;BraA03g058610.3C;BraA06g041020.3C;BraA06g038810.3C;BraA09g016060.3C;BraA09g036990.3C	0.0559734
GO:0000145	exocyst	cellular_component	BraA02g005230.3C;BraA02g000970.3C;BraA02g015430.3C;BraA10g017560.3C;BraA10g024960.3C;BraA07g029420.3C;BraA07g018980.3C;BraA06g016620.3C;BraA10g006440.3C;BraA05g032980.3C;BraA03g034290.3C;BraA10g017570.3C;BraA01g040700.3C;BraA07g029120.3C;BraA03g011890.3C;BraA10g008830.3C;BraA10g032580.3C;BraA02g016370.3C;BraA05g006590.3C;BraA02g011610.3C;BraA05g006600.3C;BraA10g005630.3C;BraA05g036390.3C;BraA03g0…	0.0641678
GO:0000785	chromatin	cellular_component	BraA09g005850.3C;BraA07g003420.3C;BraA09g008000.3C;BraA03g004650.3C;BraA01g002890.3C;BraA03g059550.3C;BraA08g022640.3C;BraA05g036160.3C;BraA07g015590.3C;BraA02g044330.3C;BraA08g014900.3C;BraA01g012810.3C;BraA03g001650.3C;BraA08g017890.3C;BraA10g026670.3C;BraA03g050060.3C;BraA06g033880.3C;BraA07g032700.3C;BraA04g024650.3C;BraA06g027290.3C;BraA10g012400.3C;BraA06g016170.3C	0.0706491
GO:0000977	RNA polymerase II regulatory region sequence-specific DNA binding	molecular_function	BraA09g022560.3C;BraA04g002340.3C;BraA04g020250.3C;BraA09g042110.3C;BraA07g005380.3C;BraA09g036250.3C;BraA07g006880.3C;BraA05g017160.3C;BraA04g003580.3C;BraA09g028800.3C;BraA04g012040.3C;BraA07g002390.3C;BraA07g018150.3C;BraA08g020140.3C;BraA03g060350.3C;BraA06g011360.3C;BraA06g041300.3C;BraA03g040920.3C;BraA03g039480.3C;BraA08g013420.3C;BraA06g018270.3C;BraA01g032900.3C;BraA07g018730.3C;BraA09g0…	0.079228
GO:0005794	Golgi apparatus	cellular_component	BraA01g014060.3C;BraA07g005440.3C;BraA05g037290.3C;BraA06g040530.3C;BraA07g011290.3C;BraA09g030450.3C;BraA05g036120.3C;BraA03g017970.3C;BraA03g042900.3C;BraA09g040570.3C;BraA02g040130.3C;BraA01g021400.3C;BraA08g030330.3C;BraA08g001840.3C;BraA01g044360.3C;BraA03g013840.3C;BraA01g018250.3C;BraA05g010700.3C;BraA09g049450.3C;BraA04g026930.3C;BraA09g027540.3C;BraA09g019280.3C;BraA06g011070.3C;BraA08g0…	0.0796736
GO:0004338	glucan exo-1,3-beta-glucosidase activity	molecular_function	BraA04g003400.3C;BraA07g038740.3C;BraA10g020220.3C;BraA04g003410.3C;BraA09g047900.3C;BraA09g047910.3C;BraA09g047880.3C;BraA02g008840.3C;BraA04g003380.3C;BraA10g020080.3C;BraA02g008950.3C;BraA04g003370.3C;BraA04g003430.3C	0.0822144
GO:0005215	transporter activity	molecular_function	BraA04g005350.3C;BraA03g044730.3C;BraA06g038210.3C;BraA01g032090.3C;BraA03g049780.3C;BraA07g017760.3C;BraA02g020790.3C;BraA08g014300.3C;BraA09g021580.3C;BraA03g042080.3C;BraA05g007130.3C;BraA03g007550.3C;BraA10g024860.3C;BraA03g045660.3C;BraA07g029730.3C;BraA09g045420.3C;BraA01g018800.3C;BraA03g036010.3C;BraA05g012020.3C;BraA02g020270.3C;BraA07g030190.3C;BraA03g021460.3C;BraA09g066210.3C;BraA05g0…	0.0860708
GO:0004252	serine-type endopeptidase activity	molecular_function	BraA06g040550.3C;BraA04g012220.3C;BraA07g037980.3C;BraA02g028690.3C;BraA02g011410.3C;BraA03g053060.3C;BraA05g032780.3C;BraA02g035990.3C;BraA06g001950.3C;BraA10g017020.3C;BraA06g009250.3C;BraA04g015150.3C;BraA01g011480.3C;BraA01g025990.3C;BraA07g007020.3C;BraA03g049510.3C;BraA09g003510.3C;BraA09g011770.3C;BraA02g038940.3C;BraA06g040540.3C;BraA06g043010.3C;BraA06g020050.3C;BraA09g032250.3C;BraA03g0…	0.0872151
GO:0003746	translation elongation factor activity	molecular_function	BraA06g005200.3C;BraA06g039520.3C;BraA07g035750.3C;BraA03g005160.3C;BraA08g033360.3C;BraA03g028810.3C;BraA02g026520.3C;BraA05g013200.3C;BraA02g004340.3C;BraA08g018700.3C;BraA08g014100.3C;BraA09g063030.3C;BraA08g023440.3C;BraA02g002800.3C;BraA03g010740.3C;BraA08g032500.3C;BraA01g011410.3C;BraA05g004830.3C;BraA03g049270.3C;BraA09g063940.3C;BraA07g019980.3C;BraA05g037550.3C;BraA09g027470.3C;BraA02g0…	0.089723
GO:0005886	plasma membrane	cellular_component	BraA02g017230.3C;BraA09g030310.3C;BraA01g041100.3C;BraA06g008540.3C;BraA10g032050.3C;BraA06g022670.3C;BraA06g009920.3C;BraA08g017760.3C;BraA03g055300.3C;BraA01g029530.3C;BraA02g005950.3C;BraA06g043310.3C;BraA05g018400.3C;BraA09g028180.3C;BraA03g008980.3C;BraA07g020070.3C;BraA03g001090.3C;BraA07g019470.3C;BraA06g005340.3C;BraA03g055620.3C;BraA04g008190.3C;BraA05g005230.3C;BraA03g030560.3C;BraA03g0…	0.0942261
GO:0000160	phosphorelay signal transduction system	biological_process	BraA03g002890.3C;BraA09g003800.3C;BraA09g051960.3C;BraA02g008380.3C;BraA05g030830.3C;BraA01g032170.3C;BraA10g001990.3C;BraA06g036380.3C;BraA03g037500.3C;BraA07g025650.3C;BraA02g011810.3C;BraA04g011610.3C	0.0996386
GO:0004021	L-alanine:2-oxoglutarate aminotransferase activity	molecular_function	BraA07g035330.3C;BraA07g024050.3C;BraA03g051200.3C;BraA08g015340.3C;BraA06g033980.3C;BraA03g051230.3C;BraA09g026980.3C;BraA07g035320.3C;BraA02g019880.3C;BraA01g014290.3C;BraA09g026970.3C;BraA03g051190.3C	0.0996386
GO:0004033	aldo-keto reductase (NADP) activity	molecular_function	BraA03g058040.3C;BraA07g018280.3C;BraA10g002960.3C;BraA10g011910.3C;BraA05g007770.3C;BraA08g033840.3C;BraA09g017020.3C;BraA03g019700.3C;BraA05g007790.3C;BraA05g007780.3C;BraA08g016480.3C;BraA03g019710.3C	0.0996386
GO:0003333	amino acid transmembrane transport	biological_process	BraA09g037270.3C;BraA03g049440.3C;BraA09g033350.3C;BraA08g005920.3C;BraA03g021190.3C;BraA03g059280.3C;BraA02g024300.3C;BraA05g033350.3C;BraA08g015450.3C;BraA10g033710.3C;BraA05g020900.3C;BraA10g007850.3C;BraA04g024910.3C;BraA07g012400.3C;BraA05g011560.3C;BraA07g040800.3C;BraA01g003230.3C;BraA09g055860.3C;BraA03g003820.3C;BraA06g040090.3C;BraA01g033640.3C;BraA08g015430.3C;BraA07g026930.3C;BraA10g0…	0.103669
GO:0003743	translation initiation factor activity	molecular_function	BraA02g010950.3C;BraA01g017830.3C;BraA05g010650.3C;BraA07g013150.3C;BraA10g009810.3C;BraA07g007400.3C;BraA07g035920.3C;BraA03g023930.3C;BraA09g014050.3C;BraA10g012990.3C;BraA05g010680.3C;BraA06g029340.3C;BraA05g033110.3C;BraA10g026350.3C;BraA08g030660.3C;BraA03g056310.3C;BraA04g017640.3C;BraA09g024820.3C;BraA04g024780.3C;BraA04g011180.3C;BraA05g038360.3C;BraA08g027440.3C;BraA01g030600.3C;BraA09g0…	0.105225
GO:0005451	monovalent cation:proton antiporter activity	molecular_function	BraA04g005940.3C;BraA09g062910.3C;BraA06g021280.3C;BraA01g025860.3C;BraA10g018670.3C;BraA09g010040.3C;BraA10g004440.3C;BraA03g051370.3C;BraA10g016340.3C;BraA04g014100.3C;BraA02g010080.3C;BraA02g025240.3C;BraA04g007230.3C;BraA04g023030.3C;BraA07g021420.3C;BraA03g038020.3C;BraA03g011860.3C;BraA09g013630.3C;BraA09g044720.3C;BraA03g010470.3C;BraA08g029650.3C;BraA04g021540.3C;BraA01g035030.3C;BraA06g0…	0.107346
GO:0005768	endosome	cellular_component	BraA09g002860.3C;BraA09g035240.3C;BraA02g011170.3C;BraA08g023270.3C;BraA06g015250.3C;BraA05g025940.3C;BraA07g022520.3C;BraA06g039270.3C;BraA10g021820.3C;BraA02g004410.3C;BraA07g025100.3C;BraA10g025330.3C;BraA08g030950.3C;BraA04g004260.3C;BraA01g005650.3C;BraA02g009060.3C;BraA02g041740.3C;BraA10g019960.3C;BraA05g042340.3C;BraA05g035940.3C;BraA05g028890.3C;BraA01g005460.3C;BraA01g032520.3C;BraA07g0…	0.108142
GO:0005774	vacuolar membrane	cellular_component	BraA04g015300.3C;BraA07g027910.3C;BraA02g018040.3C;BraA07g042450.3C;BraA10g003980.3C;BraA09g045690.3C;BraA06g024820.3C;BraA10g033370.3C;BraA02g034990.3C;BraA09g058290.3C;BraA06g005630.3C;BraA03g007000.3C;BraA09g003060.3C;BraA09g023280.3C;BraA06g040290.3C;BraA06g036650.3C;BraA05g034270.3C;BraA05g002070.3C;BraA01g023990.3C;BraA06g000710.3C;BraA09g045660.3C;BraA01g006560.3C;BraA01g014330.3C;BraA04g0…	0.108806
GO:0016787	hydrolase activity	molecular_function	BraA02g029020.3C;BraA03g027110.3C;BraA02g000360.3C;BraA10g019340.3C;BraA01g015130.3C;BraA01g025370.3C;BraA09g052350.3C;BraA07g019500.3C;BraA06g021460.3C;BraA04g005550.3C;BraA07g020680.3C;BraA05g012290.3C;BraA01g003930.3C;BraA05g028280.3C;BraA03g038650.3C;BraA08g028780.3C;BraA09g045220.3C;BraA04g030850.3C;BraA10g019300.3C	0.112157
GO:0002213	defense response to insect	biological_process	BraA05g003770.3C;BraA03g050740.3C;BraA10g024810.3C;BraA09g054350.3C;BraA03g022970.3C;BraA04g021050.3C;BraA01g013720.3C;BraA06g018410.3C;BraA02g038290.3C;BraA09g003560.3C;BraA02g012430.3C;BraA06g024580.3C;BraA03g012530.3C;BraA06g036860.3C;BraA04g004250.3C;BraA07g039330.3C;BraA02g038280.3C;BraA03g050750.3C;BraA10g015140.3C	0.112157
GO:0000502	proteasome complex	cellular_component	BraA02g025160.3C;BraA01g018570.3C;BraA01g015570.3C;BraA08g001360.3C;BraA09g064720.3C;BraA03g052080.3C;BraA05g015830.3C;BraA03g054490.3C;BraA10g027920.3C;BraA02g003230.3C;BraA09g023680.3C;BraA03g009350.3C;BraA01g031860.3C;BraA05g016620.3C;BraA03g007650.3C;BraA09g006520.3C;BraA03g014400.3C;BraA06g044010.3C;BraA07g000250.3C;BraA09g018670.3C;BraA08g034630.3C;BraA03g030830.3C;BraA08g018730.3C;BraA02g0…	0.114551
GO:0004506	squalene monooxygenase activity	molecular_function	BraA01g001230.3C;BraA02g042300.3C;BraA09g056220.3C;BraA06g031540.3C;BraA09g017900.3C;BraA02g042310.3C;BraA04g007810.3C;BraA06g031530.3C;BraA09g006230.3C;BraA04g016830.3C;BraA02g042320.3C	0.120755
GO:0000038	very long-chain fatty acid metabolic process	biological_process	BraA04g015930.3C;BraA02g018480.3C;BraA09g065990.3C;BraA05g010280.3C;BraA02g033670.3C;BraA09g010440.3C;BraA07g030740.3C;BraA09g022550.3C;BraA07g004540.3C;BraA07g029700.3C;BraA04g019210.3C;BraA08g015890.3C;BraA02g039980.3C;BraA02g020280.3C;BraA09g037930.3C;BraA01g004000.3C;BraA06g041310.3C;BraA03g043030.3C;BraA03g058730.3C;BraA05g001130.3C;BraA09g052820.3C;BraA06g015010.3C;BraA08g015900.3C;BraA10g0…	0.125371
GO:0004553	hydrolase activity, hydrolyzing O-glycosyl compounds	molecular_function	BraA03g011780.3C;BraA03g035110.3C;BraA07g017530.3C;BraA09g039940.3C;BraA07g007140.3C;BraA09g060330.3C;BraA10g013180.3C;BraA09g052050.3C;BraA04g020960.3C;BraA10g019680.3C;BraA01g029610.3C;BraA02g013450.3C;BraA06g023300.3C;BraA09g028870.3C;BraA05g004360.3C;BraA06g038720.3C;BraA07g000160.3C;BraA04g005430.3C;BraA02g009240.3C;BraA02g020430.3C;BraA07g008730.3C;BraA10g031520.3C;BraA02g040250.3C;BraA05g0…	0.127989
GO:0004175	endopeptidase activity	molecular_function	BraA04g009830.3C;BraA02g010160.3C;BraA08g031320.3C;BraA04g021650.3C;BraA09g000340.3C;BraA03g018930.3C;BraA06g006620.3C;BraA01g041740.3C;BraA02g029370.3C;BraA03g029910.3C;BraA06g007420.3C;BraA08g032460.3C;BraA08g011470.3C;BraA03g016220.3C;BraA09g061120.3C;BraA03g046520.3C;BraA09g017330.3C;BraA02g029340.3C	0.130429
GO:0004702	receptor signaling protein serine/threonine kinase activity	molecular_function	BraA03g030760.3C;BraA02g013540.3C;BraA02g019090.3C;BraA09g015090.3C;BraA05g012410.3C;BraA03g013580.3C;BraA04g023340.3C;BraA03g035970.3C;BraA02g039020.3C;BraA07g016850.3C;BraA01g038090.3C;BraA10g013110.3C;BraA01g001700.3C;BraA10g014500.3C;BraA08g010570.3C;BraA05g033580.3C;BraA10g003690.3C;BraA01g044500.3C	0.130429
GO:0000287	magnesium ion binding	molecular_function	BraA07g030600.3C;BraA01g037250.3C;BraA08g018210.3C;BraA07g028000.3C;BraA10g023020.3C;BraA08g028650.3C;BraA05g033130.3C;BraA02g044390.3C;BraA08g001020.3C;BraA03g062560.3C;BraA08g026610.3C;BraA08g015360.3C;BraA10g022610.3C;BraA03g036520.3C;BraA06g014310.3C;BraA04g016010.3C;BraA01g023870.3C;BraA04g025460.3C;BraA05g009810.3C;BraA02g038750.3C;BraA06g008560.3C;BraA05g018300.3C;BraA02g007760.3C;BraA10g0…	0.140752
GO:0004177	aminopeptidase activity	molecular_function	BraA10g014780.3C;BraA01g006840.3C;BraA08g000190.3C;BraA01g004910.3C;BraA03g026290.3C;BraA03g049350.3C;BraA08g021370.3C;BraA09g053860.3C;BraA05g039860.3C;BraA09g060230.3C;BraA08g030570.3C;BraA02g005200.3C;BraA05g002410.3C;BraA03g042550.3C;BraA05g004970.3C;BraA08g016750.3C;BraA08g021260.3C;BraA01g008120.3C;BraA07g024660.3C;BraA01g011620.3C;BraA08g032730.3C;BraA06g038780.3C;BraA01g002060.3C;BraA04g0…	0.142622
GO:0004849	uridine kinase activity	molecular_function	BraA02g021970.3C;BraA07g013000.3C;BraA09g033090.3C;BraA02g022000.3C;BraA02g034710.3C;BraA09g038260.3C;BraA08g008980.3C;BraA05g023780.3C;BraA08g025640.3C;BraA07g017330.3C	0.146346
GO:0003883	CTP synthase activity	molecular_function	BraA03g049260.3C;BraA01g011390.3C;BraA05g034420.3C;BraA03g035440.3C;BraA09g034170.3C;BraA02g026870.3C;BraA07g010340.3C;BraA07g007920.3C;BraA05g010180.3C;BraA01g038730.3C	0.146346
GO:0005247	voltage-gated chloride channel activity	molecular_function	BraA04g015280.3C;BraA03g026010.3C;BraA06g033240.3C;BraA06g037830.3C;BraA06g000470.3C;BraA07g020350.3C;BraA08g000460.3C;BraA02g016360.3C;BraA02g037480.3C;BraA08g009470.3C	0.146346
GO:0006633	fatty acid biosynthetic process	biological_process	BraA08g017820.3C;BraA03g034680.3C;BraA01g044100.3C;BraA01g006810.3C;BraA03g031070.3C;BraA01g044130.3C;BraA05g041270.3C;BraA10g023380.3C;BraA05g035680.3C;BraA01g022680.3C	0.146346
GO:0004176	ATP-dependent peptidase activity	molecular_function	BraA08g033920.3C;BraA09g052830.3C;BraA07g032970.3C;BraA05g013660.3C;BraA06g041360.3C;BraA09g061230.3C;BraA07g019340.3C;BraA09g030650.3C;BraA03g015750.3C;BraA06g015280.3C;BraA03g014510.3C;BraA09g052940.3C;BraA10g011690.3C;BraA05g030910.3C;BraA05g042490.3C;BraA09g057160.3C;BraA04g019170.3C;BraA06g028040.3C;BraA10g005170.3C;BraA02g014760.3C;BraA03g025560.3C;BraA02g022790.3C;BraA10g016700.3C;BraA09g0…	0.147173
GO:0003825	alpha,alpha-trehalose-phosphate synthase (UDP-forming) activity	molecular_function	BraA08g033930.3C;BraA03g047730.3C;BraA10g005140.3C;BraA01g028060.3C;BraA06g012810.3C;BraA07g041670.3C;BraA10g005120.3C;BraA03g053750.3C;BraA10g005130.3C;BraA02g019700.3C;BraA03g061490.3C;BraA07g030960.3C;BraA09g011560.3C;BraA10g005150.3C;BraA08g026340.3C;BraA06g012820.3C;BraA02g024760.3C	0.151409
GO:0004430	1-phosphatidylinositol 4-kinase activity	molecular_function	BraA05g018610.3C;BraA06g027540.3C;BraA04g028940.3C;BraA04g032090.3C;BraA09g038270.3C;BraA09g006220.3C;BraA03g024210.3C;BraA09g047250.3C;BraA02g044430.3C;BraA06g002890.3C;BraA06g009900.3C;BraA05g019790.3C;BraA08g025690.3C;BraA10g001140.3C;BraA06g038970.3C;BraA06g003960.3C;BraA06g031580.3C	0.151409
GO:0005096	GTPase activator activity	molecular_function	BraA03g059540.3C;BraA04g019750.3C;BraA03g033530.3C;BraA10g003380.3C;BraA03g005680.3C;BraA09g001250.3C;BraA02g015240.3C;BraA10g020930.3C;BraA10g020980.3C;BraA09g037580.3C;BraA09g007010.3C;BraA05g035410.3C;BraA10g026150.3C;BraA08g014500.3C;BraA10g025460.3C;BraA05g008180.3C;BraA04g028420.3C;BraA02g008110.3C;BraA08g034650.3C;BraA04g028370.3C;BraA05g035430.3C;BraA09g024880.3C;BraA05g001140.3C;BraA02g0…	0.161516
GO:0000932	cytoplasmic mRNA processing body	cellular_component	BraA09g052470.3C;BraA03g002940.3C;BraA02g026530.3C;BraA08g025610.3C;BraA04g031630.3C;BraA09g020370.3C;BraA09g007450.3C;BraA05g011230.3C;BraA07g012880.3C;BraA09g000470.3C;BraA09g065390.3C;BraA04g000150.3C;BraA06g043220.3C;BraA09g007490.3C;BraA03g030020.3C;BraA08g005360.3C;BraA03g028990.3C;BraA02g043190.3C;BraA10g001690.3C;BraA06g025290.3C;BraA02g002310.3C;BraA04g027950.3C;BraA10g006830.3C	0.161921
GO:0000165	MAPK cascade	biological_process	BraA03g052940.3C;BraA09g029190.3C;BraA03g039660.3C;BraA05g018200.3C;BraA06g005980.3C;BraA09g027220.3C;BraA05g039180.3C;BraA01g032420.3C;BraA06g001120.3C;BraA03g026570.3C;BraA09g011270.3C;BraA04g012930.3C;BraA08g002490.3C;BraA09g062650.3C;BraA07g002560.3C;BraA09g032810.3C	0.175421
GO:0003840	gamma-glutamyltransferase activity	molecular_function	BraA01g008390.3C;BraA03g054970.3C;BraA01g000550.3C;BraA08g022350.3C;BraA03g054990.3C;BraA01g000570.3C;BraA06g044240.3C;BraA03g054980.3C;BraA06g044230.3C	0.177359
GO:0003724	RNA helicase activity	molecular_function	BraA09g017560.3C;BraA09g051730.3C;BraA01g027760.3C;BraA08g025720.3C;BraA09g042480.3C;BraA09g038310.3C;BraA03g024390.3C;BraA07g027660.3C;BraA10g004290.3C	0.177359
GO:0006631	fatty acid metabolic process	biological_process	BraA08g019590.3C;BraA09g009920.3C;BraA05g023690.3C;BraA02g040290.3C;BraA03g040860.3C;BraA02g008880.3C;BraA03g057490.3C;BraA03g053450.3C;BraA06g005760.3C	0.177359
GO:0005313	L-glutamate transmembrane transporter activity	molecular_function	BraA09g017950.3C;BraA06g027750.3C;BraA03g061990.3C;BraA06g006910.3C;BraA09g057960.3C;BraA01g027470.3C;BraA09g062080.3C;BraA09g008200.3C;BraA06g006890.3C	0.177359
GO:0004416	hydroxyacylglutathione hydrolase activity	molecular_function	BraA05g003580.3C;BraA03g022740.3C;BraA06g001260.3C;BraA08g001460.3C;BraA04g030340.3C;BraA09g064120.3C;BraA05g013290.3C;BraA05g035960.3C;BraA03g016660.3C	0.177359
GO:0000293	ferric-chelate reductase activity	molecular_function	BraA09g065480.3C;BraA10g000430.3C;BraA09g033010.3C;BraA10g008260.3C;BraA02g042340.3C;BraA09g066170.3C;BraA06g031320.3C;BraA09g000670.3C;BraA09g066180.3C	0.177359
GO:0005506	iron ion binding	molecular_function	BraA03g052520.3C;BraA09g012070.3C;BraA07g038840.3C;BraA04g004330.3C;BraA06g011600.3C;BraA09g044280.3C;BraA01g001520.3C;BraA02g031780.3C;BraA05g028300.3C;BraA03g038810.3C;BraA04g008320.3C;BraA01g039750.3C;BraA05g018950.3C;BraA05g020440.3C;BraA03g038630.3C;BraA05g028290.3C;BraA09g002830.3C;BraA10g000700.3C;BraA10g010400.3C;BraA09g020930.3C;BraA06g010690.3C;BraA01g006340.3C;BraA01g001530.3C;BraA08g0…	0.178285
GO:0003777	microtubule motor activity	molecular_function	BraA09g011100.3C;BraA08g009490.3C;BraA05g026540.3C;BraA02g013740.3C;BraA08g022690.3C;BraA08g011490.3C;BraA06g044610.3C;BraA01g025440.3C;BraA02g039270.3C;BraA09g041480.3C;BraA09g002960.3C;BraA06g044620.3C;BraA07g014260.3C;BraA08g023200.3C;BraA06g014180.3C;BraA09g052710.3C;BraA08g002220.3C;BraA09g013270.3C;BraA02g040780.3C;BraA01g035880.3C;BraA01g026000.3C;BraA01g039240.3C;BraA07g028520.3C;BraA03g0…	0.178288
GO:0003955	NAD(P)H dehydrogenase (quinone) activity	molecular_function	BraA04g002700.3C;BraA10g003360.3C;BraA01g017290.3C;BraA03g060260.3C;BraA08g020640.3C;BraA08g020630.3C;BraA06g037310.3C;BraA08g013680.3C;BraA07g005830.3C;BraA09g038870.3C;BraA01g018020.3C;BraA01g002070.3C;BraA10g010820.3C;BraA09g032080.3C;BraA08g006270.3C;BraA02g011420.3C;BraA10g012610.3C;BraA02g013870.3C;BraA10g022640.3C;BraA01g002780.3C;BraA03g013910.3C;BraA04g007120.3C	0.183438
GO:0005351	sugar:proton symporter activity	molecular_function	BraA07g002130.3C;BraA07g004640.3C;BraA07g026250.3C;BraA01g011070.3C;BraA09g061400.3C;BraA06g016300.3C;BraA09g012140.3C;BraA02g040680.3C;BraA02g023500.3C;BraA03g047590.3C;BraA05g040020.3C;BraA09g025580.3C;BraA07g040010.3C;BraA02g017160.3C;BraA07g004660.3C;BraA07g040650.3C;BraA01g042840.3C;BraA03g005880.3C;BraA03g028300.3C;BraA07g027400.3C;BraA03g032430.3C;BraA09g056610.3C;BraA01g033320.3C;BraA03g0…	0.185421
GO:0005507	copper ion binding	molecular_function	BraA08g009910.3C;BraA03g035900.3C;BraA04g023210.3C;BraA02g027860.3C;BraA05g028770.3C;BraA08g017270.3C;BraA07g014460.3C;BraA03g011020.3C;BraA07g025460.3C;BraA09g023180.3C;BraA05g011580.3C;BraA01g025460.3C;BraA04g021440.3C;BraA10g033280.3C;BraA02g042050.3C;BraA04g006150.3C;BraA04g029900.3C;BraA01g038160.3C;BraA09g064020.3C;BraA07g017000.3C;BraA03g014290.3C;BraA10g017800.3C;BraA10g014210.3C;BraA07g0…	0.191377
GO:0005887	integral component of plasma membrane	cellular_component	BraA01g043490.3C;BraA03g045750.3C;BraA09g053950.3C;BraA10g025290.3C;BraA07g022600.3C;BraA01g043510.3C;BraA08g009030.3C;BraA01g040130.3C;BraA09g043100.3C;BraA01g036240.3C;BraA09g040030.3C;BraA03g035310.3C;BraA09g021250.3C;BraA03g037280.3C;BraA07g014340.3C;BraA01g034570.3C;BraA03g009170.3C;BraA02g014000.3C;BraA02g031850.3C;BraA05g039250.3C;BraA02g031860.3C;BraA05g031130.3C;BraA02g014850.3C;BraA05g0…	0.194783
GO:0004806	triglyceride lipase activity	molecular_function	BraA05g002920.3C;BraA08g005570.3C;BraA09g027630.3C;BraA06g018820.3C;BraA04g001070.3C;BraA03g016900.3C;BraA01g019660.3C;BraA10g021520.3C;BraA10g032260.3C;BraA05g004680.3C;BraA03g030070.3C;BraA03g016580.3C;BraA03g001420.3C;BraA03g001410.3C;BraA10g004570.3C;BraA10g007150.3C;BraA01g037530.3C;BraA07g022740.3C;BraA09g065680.3C;BraA08g033990.3C;BraA05g013560.3C;BraA01g010040.3C;BraA02g001210.3C;BraA03g0…	0.197513
GO:0000139	Golgi membrane	cellular_component	BraA07g019300.3C;BraA09g022210.3C;BraA04g002390.3C;BraA07g013560.3C;BraA07g022200.3C;BraA09g036980.3C;BraA08g026130.3C;BraA02g026880.3C;BraA08g009570.3C;BraA07g013540.3C;BraA01g005560.3C;BraA05g023580.3C;BraA10g032230.3C;BraA09g058480.3C;BraA08g024810.3C;BraA08g027150.3C;BraA01g043110.3C;BraA06g008310.3C;BraA10g011680.3C;BraA05g039130.3C;BraA04g000630.3C;BraA08g006700.3C;BraA05g036970.3C;BraA09g0…	0.199406
GO:0001522	pseudouridine synthesis	biological_process	BraA09g062200.3C;BraA06g015940.3C;BraA09g056180.3C;BraA06g006680.3C;BraA07g015760.3C;BraA03g008380.3C;BraA01g043390.3C;BraA02g007540.3C;BraA07g000330.3C;BraA09g012350.3C;BraA03g033030.3C;BraA09g031170.3C;BraA06g015880.3C;BraA03g016140.3C;BraA07g039590.3C	0.202809
GO:0000228	nuclear chromosome	cellular_component	BraA03g052600.3C;BraA01g023470.3C;BraA10g028370.3C;BraA05g019670.3C;BraA03g038390.3C;BraA03g007370.3C;BraA04g013430.3C;BraA03g029310.3C;BraA01g029750.3C;BraA08g006660.3C;BraA02g006410.3C;BraA10g023350.3C;BraA09g000530.3C;BraA01g009970.3C;BraA06g030840.3C	0.202809
GO:0004144	diacylglycerol O-acyltransferase activity	molecular_function	BraA03g045590.3C;BraA03g020610.3C;BraA02g020740.3C;BraA09g011830.3C;BraA03g014500.3C;BraA01g044750.3C;BraA02g020720.3C;BraA05g006760.3C;BraA03g018560.3C;BraA05g014990.3C;BraA07g001370.3C;BraA02g014610.3C;BraA03g065310.3C;BraA03g020600.3C;BraA04g030440.3C	0.202809
GO:0004656	procollagen-proline 4-dioxygenase activity	molecular_function	BraA04g030570.3C;BraA06g015790.3C;BraA09g009770.3C;BraA10g021330.3C;BraA01g016330.3C;BraA06g036990.3C;BraA08g016330.3C;BraA05g003370.3C;BraA08g027890.3C;BraA01g002740.3C;BraA08g020560.3C;BraA02g007880.3C;BraA01g002730.3C;BraA01g002720.3C;BraA09g003460.3C	0.202809
GO:0004366	glycerol-3-phosphate O-acyltransferase activity	molecular_function	BraA01g039620.3C;BraA03g029380.3C;BraA05g034970.3C;BraA10g028830.3C;BraA05g034980.3C;BraA10g001190.3C;BraA09g002200.3C;BraA09g000610.3C;BraA05g023520.3C;BraA09g032920.3C;BraA01g003150.3C;BraA01g039650.3C;BraA10g018390.3C;BraA08g008890.3C;BraA10g005240.3C	0.202809
GO:0004497	monooxygenase activity	molecular_function	BraA05g005310.3C;BraA07g019510.3C;BraA03g044300.3C;BraA02g013640.3C;BraA06g044820.3C;BraA07g012370.3C;BraA02g017400.3C;BraA03g046420.3C;BraA03g036580.3C;BraA05g032450.3C;BraA02g039080.3C;BraA01g001500.3C;BraA03g046180.3C;BraA06g008630.3C;BraA09g015770.3C;BraA02g030050.3C;BraA08g017020.3C;BraA09g064780.3C;BraA09g047290.3C;BraA06g032230.3C;BraA02g017420.3C;BraA03g036550.3C;BraA05g000910.3C;BraA08g0…	0.204955
GO:0003774	motor activity	molecular_function	BraA01g008800.3C;BraA09g020070.3C;BraA03g039130.3C;BraA08g022840.3C;BraA02g008900.3C;BraA09g057680.3C;BraA01g018110.3C;BraA08g034820.3C;BraA04g002800.3C;BraA02g014010.3C;BraA01g004760.3C;BraA06g043500.3C;BraA03g009650.3C;BraA08g034810.3C;BraA03g057770.3C;BraA07g023300.3C;BraA09g065040.3C;BraA05g019380.3C;BraA09g013330.3C;BraA07g000540.3C;BraA05g027380.3C;BraA03g016990.3C;BraA10g020150.3C;BraA03g0…	0.205298
GO:0002084	protein depalmitoylation	biological_process	BraA03g050140.3C;BraA03g047530.3C;BraA01g019180.3C;BraA01g019170.3C;BraA01g019190.3C;BraA08g012400.3C;BraA03g050150.3C;BraA01g019160.3C	0.214943
GO:0009738	abscisic acid-activated signaling pathway	biological_process	BraA07g032090.3C;BraA07g035500.3C;BraA07g035510.3C;BraA04g010620.3C;BraA04g010610.3C;BraA07g029770.3C;BraA01g003560.3C;BraA07g029780.3C	0.214943
GO:0004031	aldehyde oxidase activity	molecular_function	BraA06g022060.3C;BraA06g023170.3C;BraA06g022070.3C;BraA10g019670.3C;BraA06g022080.3C;BraA10g003130.3C;BraA04g019480.3C;BraA02g009250.3C	0.214943
GO:0004576	oligosaccharyl transferase activity	molecular_function	BraA03g009200.3C;BraA02g035020.3C;BraA07g039950.3C;BraA06g040280.3C;BraA09g031210.3C;BraA02g008360.3C;BraA05g022250.3C;BraA10g020680.3C	0.214943
GO:0006886	intracellular protein transport	biological_process	BraA03g037270.3C;BraA03g060100.3C;BraA08g021170.3C;BraA08g011370.3C;BraA03g051310.3C;BraA05g017790.3C;BraA01g036250.3C;BraA09g016590.3C	0.214943
GO:0002184	cytoplasmic translational termination	biological_process	BraA09g052440.3C;BraA07g007130.3C;BraA03g026490.3C;BraA09g057420.3C;BraA01g023750.3C;BraA06g013780.3C;BraA08g028930.3C;BraA04g000230.3C	0.214943
GO:0000254	C-4 methylsterol oxidase activity	molecular_function	BraA01g013360.3C;BraA02g028020.3C;BraA08g033630.3C;BraA01g013370.3C;BraA10g006090.3C;BraA04g021060.3C;BraA03g051440.3C;BraA09g063340.3C	0.214943
GO:0000793	condensed chromosome	cellular_component	BraA03g019630.3C;BraA01g035770.3C;BraA05g012360.3C;BraA05g007920.3C;BraA04g010480.3C;BraA05g030510.3C;BraA04g023400.3C;BraA01g028280.3C	0.214943
GO:0005452	inorganic anion exchanger activity	molecular_function	BraA05g000710.3C;BraA04g000750.3C;BraA03g024360.3C;BraA05g000700.3C;BraA06g032730.3C;BraA05g000720.3C;BraA03g032700.3C;BraA02g022500.3C	0.214943
GO:0004557	alpha-galactosidase activity	molecular_function	BraA06g024870.3C;BraA09g047020.3C;BraA02g002710.3C;BraA02g036920.3C;BraA05g022020.3C;BraA03g003500.3C;BraA03g003510.3C;BraA02g002700.3C	0.214943
GO:0004040	amidase activity	molecular_function	BraA02g044610.3C;BraA06g027920.3C;BraA06g027890.3C;BraA01g003450.3C;BraA09g062520.3C;BraA10g031190.3C;BraA10g029860.3C;BraA02g033980.3C	0.214943
GO:0004066	asparagine synthase (glutamine-hydrolyzing) activity	molecular_function	BraA10g021080.3C;BraA06g023920.3C;BraA06g019700.3C;BraA06g039190.3C;BraA03g004190.3C;BraA09g024070.3C;BraA06g028460.3C;BraA02g007980.3C	0.214943
GO:0004693	cyclin-dependent protein serine/threonine kinase activity	molecular_function	BraA03g000520.3C;BraA10g006790.3C;BraA09g001110.3C;BraA09g041350.3C;BraA05g020670.3C;BraA05g013490.3C;BraA07g037720.3C;BraA06g035450.3C;BraA04g005220.3C;BraA09g007930.3C;BraA04g005640.3C;BraA02g039790.3C;BraA09g054820.3C;BraA02g045200.3C;BraA10g027610.3C;BraA04g020030.3C;BraA09g008650.3C;BraA03g045010.3C;BraA02g031590.3C;BraA04g016470.3C;BraA03g060890.3C;BraA06g042650.3C;BraA08g005310.3C;BraA01g0…	0.228391
GO:0016021	integral component of membrane	cellular_component	BraA06g014650.3C;BraA10g005870.3C;BraA09g063500.3C;BraA02g036520.3C;BraA07g004740.3C;BraA02g031670.3C;BraA08g019910.3C;BraA02g027250.3C;BraA01g028300.3C;BraA06g033470.3C;BraA06g043650.3C;BraA09g007860.3C;BraA01g021160.3C;BraA07g011790.3C;BraA03g029690.3C;BraA05g008740.3C;BraA02g012800.3C;BraA01g024490.3C;BraA01g021910.3C;BraA08g025400.3C;BraA09g000920.3C;BraA04g015890.3C;BraA06g018070.3C;BraA05g0…	0.229265
GO:0005737	cytoplasm	cellular_component	BraA07g041350.3C;BraA08g021820.3C;BraA01g011560.3C;BraA05g031510.3C;BraA06g029650.3C;BraA04g027360.3C;BraA06g002400.3C;BraA06g006020.3C;BraA02g018100.3C;BraA07g028430.3C;BraA03g023080.3C;BraA09g020590.3C;BraA03g014740.3C;BraA06g010260.3C;BraA07g037400.3C;BraA09g046200.3C;BraA04g005800.3C;BraA01g012300.3C;BraA02g010130.3C;BraA06g018310.3C;BraA09g018070.3C;BraA07g002510.3C;BraA03g011330.3C;BraA02g0…	0.230676
GO:0000118	histone deacetylase complex	cellular_component	BraA07g034920.3C;BraA01g044910.3C;BraA07g030100.3C;BraA09g017520.3C;BraA03g006590.3C;BraA03g061520.3C;BraA06g007280.3C;BraA02g019570.3C;BraA05g005660.3C;BraA02g019530.3C;BraA09g010130.3C;BraA04g031940.3C;BraA01g043010.3C;BraA10g024310.3C;BraA05g015480.3C;BraA01g027830.3C;BraA05g015490.3C;BraA08g017010.3C;BraA02g019540.3C;BraA07g030090.3C	0.233791
GO:0005545	1-phosphatidylinositol binding	molecular_function	BraA06g010860.3C;BraA09g001550.3C;BraA01g016660.3C;BraA07g012630.3C;BraA09g037590.3C;BraA07g033320.3C;BraA09g023240.3C;BraA04g018730.3C;BraA02g012440.3C;BraA09g031600.3C;BraA09g053130.3C;BraA01g005770.3C;BraA06g040390.3C;BraA10g001680.3C;BraA08g009360.3C;BraA06g011020.3C;BraA02g018070.3C;BraA02g027220.3C;BraA02g034900.3C;BraA09g065410.3C	0.233791
GO:0004022	alcohol dehydrogenase (NAD) activity	molecular_function	BraA02g041970.3C;BraA05g018310.3C;BraA08g026820.3C;BraA09g032360.3C;BraA08g002160.3C;BraA09g055370.3C;BraA10g020890.3C;BraA06g006380.3C;BraA09g033130.3C;BraA06g042570.3C;BraA05g022940.3C;BraA08g002870.3C;BraA07g014660.3C;BraA09g040580.3C	0.233926
GO:0004805	trehalose-phosphatase activity	molecular_function	BraA01g013200.3C;BraA03g050290.3C;BraA01g000660.3C;BraA06g044220.3C;BraA02g015830.3C;BraA03g004140.3C;BraA02g045000.3C;BraA08g022190.3C;BraA10g010090.3C;BraA04g016190.3C;BraA06g028610.3C;BraA02g024520.3C;BraA05g021550.3C;BraA10g027740.3C	0.233926
GO:0000288	nuclear-transcribed mRNA catabolic process, deadenylation-dependent decay	biological_process	BraA09g066430.3C;BraA06g005060.3C;BraA09g000840.3C;BraA04g023240.3C;BraA02g038970.3C;BraA10g000100.3C;BraA05g033640.3C;BraA08g033400.3C;BraA03g011190.3C;BraA05g033630.3C;BraA07g020890.3C;BraA02g010790.3C;BraA07g005840.3C;BraA05g032860.3C	0.233926
GO:0005525	GTP binding	molecular_function	BraA07g025080.3C;BraA10g020270.3C;BraA07g005460.3C;BraA06g017420.3C;BraA03g007200.3C;BraA04g010560.3C;BraA03g051780.3C;BraA09g009850.3C;BraA08g026450.3C;BraA09g008890.3C;BraA09g002110.3C;BraA07g025960.3C;BraA07g042760.3C;BraA09g031450.3C;BraA01g022530.3C;BraA05g034830.3C;BraA01g022040.3C;BraA06g007120.3C;BraA03g039960.3C;BraA06g007130.3C;BraA01g020610.3C;BraA09g027970.3C;BraA06g029500.3C;BraA03g0…	0.249966
GO:0000304	response to singlet oxygen	biological_process	BraA03g058010.3C;BraA08g024860.3C;BraA08g016500.3C;BraA09g003490.3C;BraA01g026880.3C;BraA03g058190.3C;BraA06g036930.3C	0.26049
GO:0004518	nuclease activity	molecular_function	BraA01g028740.3C;BraA05g005730.3C;BraA02g030480.3C;BraA03g016170.3C;BraA09g009800.3C;BraA02g022730.3C;BraA06g015210.3C	0.26049
GO:0004607	phosphatidylcholine-sterol O-acyltransferase activity	molecular_function	BraA10g002570.3C;BraA09g065120.3C;BraA07g012090.3C;BraA02g005020.3C;BraA01g011100.3C;BraA03g048950.3C;BraA10g025210.3C	0.26049
GO:0005085	guanyl-nucleotide exchange factor activity	molecular_function	BraA01g003020.3C;BraA07g008350.3C;BraA09g012390.3C;BraA06g023150.3C;BraA03g041260.3C;BraA09g066370.3C;BraA04g001480.3C	0.26049
GO:0000003	reproduction	biological_process	BraA01g032910.3C;BraA05g026440.3C;BraA05g026410.3C;BraA08g015660.3C;BraA05g026450.3C;BraA02g009540.3C;BraA08g022810.3C	0.26049
GO:0004096	catalase activity	molecular_function	BraA01g003280.3C;BraA03g059190.3C;BraA08g015510.3C;BraA08g027750.3C;BraA07g015670.3C;BraA07g015680.3C;BraA06g016090.3C	0.26049
GO:0003979	UDP-glucose 6-dehydrogenase activity	molecular_function	BraA07g019810.3C;BraA10g023980.3C;BraA03g006880.3C;BraA04g011590.3C;BraA02g006030.3C;BraA06g036370.3C;BraA09g038420.3C	0.26049
GO:0003985	acetyl-CoA C-acetyltransferase activity	molecular_function	BraA09g022910.3C;BraA09g026740.3C;BraA02g034210.3C;BraA06g035730.3C;BraA02g039500.3C;BraA09g004100.3C;BraA02g028120.3C	0.26049
GO:0005199	structural constituent of cell wall	molecular_function	BraA03g041170.3C;BraA01g004250.3C;BraA06g032830.3C;BraA01g033950.3C;BraA08g016310.3C;BraA03g022600.3C;BraA08g003750.3C;BraA01g010210.3C;BraA03g038640.3C;BraA01g031440.3C;BraA07g038060.3C;BraA06g015680.3C;BraA05g024400.3C;BraA03g058490.3C;BraA03g042940.3C;BraA05g003450.3C;BraA07g004970.3C;BraA04g030500.3C;BraA09g038640.3C	0.262931
GO:0006457	protein folding	biological_process	BraA01g011980.3C;BraA03g043570.3C;BraA01g038200.3C;BraA10g021950.3C;BraA07g038920.3C;BraA03g035830.3C;BraA10g011960.3C;BraA01g034910.3C;BraA06g023080.3C;BraA05g033880.3C;BraA01g037450.3C;BraA02g010910.3C;BraA07g026830.3C;BraA09g011400.3C;BraA03g047580.3C;BraA03g036300.3C;BraA10g025940.3C;BraA05g032880.3C;BraA02g035010.3C	0.262931
GO:0003872	6-phosphofructokinase activity	molecular_function	BraA05g017860.3C;BraA09g054830.3C;BraA07g040190.3C;BraA08g021950.3C;BraA01g008380.3C;BraA08g010410.3C;BraA01g017010.3C;BraA02g012740.3C;BraA01g014640.3C;BraA06g009590.3C;BraA01g038700.3C;BraA10g014550.3C;BraA02g037780.3C;BraA06g016400.3C;BraA03g044610.3C;BraA08g031270.3C;BraA09g025990.3C;BraA03g012880.3C;BraA01g005200.3C	0.262931
GO:0004970	ionotropic glutamate receptor activity	molecular_function	BraA03g056890.3C;BraA04g018240.3C;BraA04g020860.3C;BraA04g018250.3C;BraA02g039610.3C;BraA04g020850.3C;BraA02g039620.3C;BraA04g023230.3C;BraA02g039600.3C;BraA04g020840.3C;BraA10g032250.3C;BraA05g012530.3C;BraA09g042780.3C;BraA04g020820.3C;BraA09g004180.3C;BraA01g003100.3C;BraA07g039260.3C;BraA03g017180.3C;BraA05g012500.3C;BraA01g043180.3C;BraA09g004170.3C;BraA08g015350.3C;BraA05g014940.3C;BraA09g0…	0.267056
GO:0004526	ribonuclease P activity	molecular_function	BraA05g024750.3C;BraA10g011350.3C;BraA03g048350.3C;BraA09g058470.3C;BraA03g029530.3C;BraA02g025560.3C;BraA09g038120.3C;BraA09g060400.3C;BraA02g025570.3C;BraA06g031000.3C;BraA09g059950.3C;BraA09g059940.3C;BraA07g025970.3C	0.269122
GO:0005524	ATP binding	molecular_function	BraA06g039500.3C;BraA09g017180.3C;BraA01g030690.3C;BraA07g019350.3C;BraA02g032830.3C;BraA10g013480.3C;BraA06g007730.3C;BraA01g014000.3C;BraA08g002020.3C;BraA05g031760.3C;BraA07g039440.3C;BraA09g060820.3C;BraA10g007070.3C;BraA03g016790.3C;BraA06g036950.3C;BraA09g016380.3C;BraA01g025110.3C;BraA05g013780.3C;BraA02g042910.3C;BraA02g015060.3C;BraA06g044440.3C;BraA05g041330.3C;BraA03g060530.3C;BraA09g0…	0.273033
GO:0000775	chromosome, centromeric region	cellular_component	BraA07g024090.3C;BraA10g031430.3C;BraA04g016660.3C;BraA06g013460.3C;BraA05g004110.3C;BraA06g013560.3C;BraA03g006020.3C;BraA05g011550.3C;BraA03g005000.3C;BraA03g020430.3C;BraA02g001520.3C;BraA03g001820.3C;BraA03g025220.3C;BraA09g066110.3C;BraA04g023880.3C;BraA07g040300.3C;BraA06g013570.3C;BraA07g037290.3C;BraA06g011670.3C;BraA04g019510.3C;BraA03g001530.3C;BraA05g010000.3C;BraA10g031420.3C;BraA06g0…	0.276903
GO:0004722	protein serine/threonine phosphatase activity	molecular_function	BraA07g042530.3C;BraA10g007890.3C;BraA04g000080.3C;BraA01g042130.3C;BraA05g030470.3C;BraA10g016990.3C;BraA09g040670.3C;BraA05g000950.3C;BraA05g022160.3C;BraA05g009880.3C;BraA08g001390.3C;BraA01g035550.3C;BraA03g044450.3C;BraA10g033780.3C;BraA01g007970.3C;BraA09g008010.3C;BraA03g050630.3C;BraA10g006280.3C;BraA09g063330.3C;BraA04g000760.3C;BraA03g058350.3C;BraA06g004770.3C;BraA03g036870.3C;BraA06g0…	0.283697
GO:0004034	aldose 1-epimerase activity	molecular_function	BraA03g012470.3C;BraA07g017440.3C;BraA07g024720.3C;BraA03g030570.3C;BraA01g034770.3C;BraA02g012360.3C;BraA05g025250.3C;BraA09g051150.3C;BraA03g030410.3C;BraA06g019200.3C;BraA05g029580.3C;BraA03g006680.3C;BraA03g006350.3C;BraA01g016640.3C;BraA09g016050.3C;BraA10g024210.3C;BraA01g001840.3C;BraA10g015230.3C	0.294882
GO:0005773	vacuole	cellular_component	BraA03g024550.3C;BraA02g019330.3C;BraA05g025220.3C;BraA05g000260.3C;BraA02g019340.3C;BraA01g008740.3C;BraA03g052100.3C;BraA06g022550.3C;BraA02g021570.3C;BraA09g003960.3C;BraA04g003530.3C;BraA03g051320.3C;BraA01g016670.3C;BraA01g037010.3C;BraA05g033870.3C;BraA01g022400.3C;BraA07g031610.3C;BraA04g032540.3C;BraA02g022050.3C;BraA07g024230.3C;BraA03g016590.3C;BraA01g015590.3C;BraA07g011460.3C;BraA09g0…	0.308146
GO:0000210	NAD+ diphosphatase activity	molecular_function	BraA02g008670.3C;BraA03g046640.3C;BraA06g013950.3C;BraA02g034180.3C;BraA09g022880.3C;BraA02g032330.3C;BraA02g018670.3C;BraA08g011540.3C;BraA08g028820.3C;BraA03g009410.3C;BraA01g016230.3C;BraA01g020840.3C	0.308729
GO:0004556	alpha-amylase activity	molecular_function	BraA05g040120.3C;BraA05g021220.3C;BraA03g026790.3C;BraA10g031940.3C;BraA01g022020.3C;BraA07g039610.3C;BraA08g004710.3C;BraA08g004660.3C;BraA10g001880.3C;BraA05g006150.3C;BraA08g035410.3C;BraA05g021230.3C	0.308729
GO:0001054	RNA polymerase I activity	molecular_function	BraA04g021160.3C;BraA03g062950.3C;BraA01g029490.3C;BraA04g003160.3C;BraA03g012140.3C;BraA01g028380.3C;BraA07g022990.3C;BraA03g062440.3C;BraA05g014640.3C;BraA07g010760.3C;BraA09g016900.3C;BraA09g048220.3C	0.308729
GO:0004124	cysteine synthase activity	molecular_function	BraA04g031460.3C;BraA01g021750.3C;BraA05g003800.3C;BraA09g004820.3C;BraA04g001180.3C;BraA08g010980.3C;BraA04g001190.3C;BraA01g043580.3C;BraA09g050980.3C;BraA03g031910.3C;BraA02g040540.3C;BraA04g002260.3C	0.308729
GO:0004675	transmembrane receptor protein serine/threonine kinase activity	molecular_function	BraA07g036270.3C;BraA09g037820.3C;BraA03g058170.3C;BraA04g017630.3C;BraA09g037800.3C;BraA10g023910.3C;BraA03g058280.3C;BraA01g004630.3C;BraA03g057870.3C;BraA08g025750.3C;BraA07g031960.3C;BraA07g029410.3C	0.308729
GO:0000828	inositol hexakisphosphate kinase activity	molecular_function	BraA07g005500.3C;BraA09g021320.3C;BraA06g028800.3C;BraA03g030530.3C;BraA03g030520.3C;BraA01g044920.3C;BraA04g008980.3C;BraA02g045590.3C;BraA10g024300.3C;BraA07g003860.3C;BraA03g006600.3C;BraA05g016040.3C	0.308729
GO:0001666	response to hypoxia	biological_process	BraA02g012310.3C;BraA09g013710.3C;BraA03g036320.3C;BraA06g008210.3C;BraA02g044300.3C;BraA07g014210.3C;BraA07g029180.3C;BraA09g055170.3C;BraA04g012330.3C;BraA03g001290.3C;BraA06g002870.3C;BraA08g019880.3C;BraA05g032790.3C;BraA07g004830.3C;BraA10g007920.3C;BraA08g029330.3C;BraA03g009830.3C;BraA06g027220.3C;BraA01g037630.3C;BraA01g042360.3C;BraA07g027070.3C;BraA06g034940.3C;BraA02g040860.3C;BraA05g0…	0.314962
GO:0001887	selenium compound metabolic process	biological_process	BraA02g016390.3C;BraA10g024070.3C;BraA09g024190.3C;BraA05g040880.3C;BraA03g030640.3C;BraA06g005650.3C	0.315687
GO:0005275	amine transmembrane transporter activity	molecular_function	BraA08g005250.3C;BraA04g028520.3C;BraA07g019710.3C;BraA04g011290.3C;BraA03g025950.3C;BraA02g017780.3C	0.315687
GO:0004348	glucosylceramidase activity	molecular_function	BraA09g031520.3C;BraA01g030470.3C;BraA02g029010.3C;BraA03g064640.3C;BraA07g009500.3C;BraA03g026030.3C	0.315687
GO:0003951	NAD+ kinase activity	molecular_function	BraA03g039580.3C;BraA05g026050.3C;BraA07g041690.3C;BraA01g032560.3C;BraA02g024790.3C;BraA06g017160.3C	0.315687
GO:0000256	allantoin catabolic process	biological_process	BraA06g043670.3C;BraA09g025320.3C;BraA02g030700.3C;BraA01g008890.3C;BraA01g019500.3C;BraA03g047310.3C	0.315687
GO:0003871	5-methyltetrahydropteroyltriglutamate-homocysteine S-methyltransferase activity	molecular_function	BraA03g031420.3C;BraA10g022160.3C;BraA03g008230.3C;BraA02g007310.3C;BraA03g009950.3C;BraA10g019650.3C	0.315687
GO:0004392	heme oxygenase (decyclizing) activity	molecular_function	BraA01g017490.3C;BraA09g035910.3C;BraA09g018060.3C;BraA07g017740.3C;BraA10g013230.3C;BraA09g032450.3C	0.315687
GO:0004659	prenyltransferase activity	molecular_function	BraA05g035000.3C;BraA01g028360.3C;BraA03g035080.3C;BraA04g031070.3C;BraA05g004400.3C;BraA07g001790.3C	0.315687
GO:0032502	developmental process	biological_process	BraA03g004380.3C;BraA05g017060.3C;BraA05g017280.3C;BraA01g007660.3C;BraA02g030310.3C;BraA06g021650.3C	0.315687
GO:0003958	NADPH-hemoprotein reductase activity	molecular_function	BraA01g015300.3C;BraA01g015310.3C;BraA03g030870.3C;BraA05g025480.3C;BraA02g025100.3C;BraA03g051910.3C	0.315687
GO:0044255	cellular lipid metabolic process	biological_process	BraA07g011370.3C;BraA09g017980.3C;BraA06g006880.3C;BraA08g024090.3C;BraA09g062090.3C;BraA08g032310.3C	0.315687
GO:0000494	box C/D snoRNA 3'-end processing	biological_process	BraA10g010750.3C;BraA08g020010.3C;BraA02g015320.3C;BraA01g029160.3C;BraA01g016360.3C;BraA03g052690.3C	0.315687
GO:0004817	cysteine-tRNA ligase activity	molecular_function	BraA03g013420.3C;BraA07g019720.3C;BraA05g013390.3C;BraA05g016680.3C;BraA10g001840.3C;BraA04g011300.3C	0.315687
GO:0004072	aspartate kinase activity	molecular_function	BraA09g033770.3C;BraA02g004760.3C;BraA03g006100.3C;BraA10g025480.3C;BraA01g011040.3C;BraA02g013600.3C	0.315687
GO:0002098	tRNA wobble uridine modification	biological_process	BraA08g030450.3C;BraA03g042360.3C;BraA09g059860.3C;BraA08g007730.3C;BraA05g010520.3C;BraA03g023900.3C	0.315687
GO:0016592	mediator complex	cellular_component	BraA02g027530.3C;BraA07g020940.3C;BraA06g034590.3C;BraA04g006120.3C;BraA05g016250.3C;BraA09g025560.3C	0.315687
GO:0004046	aminoacylase activity	molecular_function	BraA03g018430.3C;BraA01g000040.3C;BraA06g044960.3C;BraA03g018420.3C;BraA10g007380.3C;BraA03g018410.3C	0.315687
GO:0004028	3-chloroallyl aldehyde dehydrogenase activity	molecular_function	BraA06g024290.3C;BraA08g005910.3C;BraA05g038790.3C;BraA01g002390.3C;BraA01g004020.3C;BraA07g028040.3C;BraA03g041190.3C;BraA08g021050.3C;BraA02g025290.3C;BraA09g010060.3C;BraA05g020840.3C;BraA06g024330.3C;BraA10g007820.3C;BraA08g026360.3C;BraA03g059920.3C;BraA06g024280.3C;BraA06g018870.3C	0.329731
GO:0000166	nucleotide binding	molecular_function	BraA03g035390.3C;BraA08g015960.3C;BraA04g004570.3C;BraA03g000750.3C;BraA05g015200.3C;BraA08g006200.3C;BraA10g002010.3C;BraA02g036940.3C;BraA05g036210.3C;BraA08g008270.3C;BraA01g009330.3C;BraA09g019340.3C;BraA03g031660.3C;BraA06g043470.3C;BraA05g029520.3C;BraA04g023990.3C;BraA03g043960.3C;BraA04g019240.3C;BraA06g010940.3C;BraA09g039380.3C;BraA06g005430.3C;BraA05g027470.3C;BraA02g017690.3C;BraA10g0…	0.339596
GO:0005345	purine nucleobase transmembrane transporter activity	molecular_function	BraA06g015320.3C;BraA04g017760.3C;BraA01g022180.3C;BraA09g053840.3C;BraA05g020520.3C;BraA08g012840.3C;BraA07g039030.3C;BraA10g007650.3C;BraA09g029330.3C;BraA08g028110.3C;BraA06g015290.3C;BraA08g024450.3C;BraA08g012820.3C;BraA09g034100.3C;BraA06g006770.3C;BraA08g024460.3C;BraA08g012810.3C;BraA08g012830.3C;BraA09g034060.3C;BraA06g015300.3C;BraA07g011800.3C;BraA01g027140.3C	0.34123
GO:0004089	carbonate dehydratase activity	molecular_function	BraA09g039520.3C;BraA07g035140.3C;BraA09g015500.3C;BraA01g027230.3C;BraA06g005290.3C;BraA06g004890.3C;BraA07g017490.3C;BraA07g014010.3C;BraA08g014670.3C;BraA06g005330.3C;BraA01g044810.3C;BraA01g011720.3C;BraA08g014570.3C;BraA08g028180.3C;BraA08g014620.3C;BraA07g018600.3C;BraA05g020740.3C;BraA06g004880.3C;BraA06g005320.3C;BraA08g016540.3C;BraA05g040570.3C;BraA06g027810.3C;BraA09g043790.3C;BraA03g0…	0.34821
GO:0005515	protein binding	molecular_function	BraA05g023420.3C;BraA03g011180.3C;BraA07g005360.3C;BraA01g028720.3C;BraA02g034930.3C;BraA01g007020.3C;BraA02g010310.3C;BraA08g002990.3C;BraA10g031390.3C;BraA07g024210.3C;BraA03g040780.3C;BraA02g030300.3C;BraA09g045320.3C;BraA05g038130.3C;BraA09g018050.3C;BraA09g007150.3C;BraA05g024590.3C;BraA07g041120.3C;BraA02g031340.3C;BraA08g029080.3C;BraA02g000250.3C;BraA01g017310.3C;BraA03g006110.3C;BraA02g0…	0.351807
GO:0004467	long-chain fatty acid-CoA ligase activity	molecular_function	BraA09g012710.3C;BraA10g026610.3C;BraA09g013870.3C;BraA05g000610.3C;BraA02g028550.3C;BraA05g000590.3C;BraA01g014520.3C;BraA03g041690.3C;BraA09g027580.3C;BraA07g026960.3C;BraA05g019770.3C	0.353035
GO:0000783	nuclear telomere cap complex	cellular_component	BraA05g034490.3C;BraA01g038840.3C;BraA02g021150.3C;BraA09g063640.3C;BraA03g019270.3C;BraA07g036990.3C;BraA06g013230.3C;BraA10g006160.3C;BraA09g004130.3C;BraA08g033550.3C;BraA10g017290.3C	0.353035
GO:0004715	non-membrane spanning protein tyrosine kinase activity	molecular_function	BraA10g005410.3C;BraA03g037240.3C;BraA04g030480.3C;BraA04g002400.3C;BraA09g063770.3C;BraA04g021990.3C;BraA05g003480.3C;BraA01g036310.3C;BraA09g049290.3C;BraA03g016380.3C;BraA05g013740.3C	0.353035
GO:0005198	structural molecule activity	molecular_function	BraA10g008370.3C;BraA03g026060.3C;BraA07g004600.3C;BraA02g014020.3C;BraA03g029410.3C;BraA08g032030.3C;BraA06g002820.3C;BraA03g030160.3C;BraA03g023580.3C;BraA06g038510.3C;BraA07g023190.3C;BraA04g007370.3C;BraA04g030770.3C;BraA09g025170.3C;BraA03g056630.3C;BraA01g012170.3C;BraA06g041270.3C;BraA01g000530.3C;BraA02g001150.3C;BraA05g006070.3C;BraA01g039770.3C;BraA09g043830.3C;BraA02g014140.3C;BraA06g0…	0.359494
GO:0005634	nucleus	cellular_component	BraA01g043500.3C;BraA10g017390.3C;BraA02g010990.3C;BraA09g001970.3C;BraA09g007080.3C;BraA02g020940.3C;BraA09g050780.3C;BraA03g040690.3C;BraA01g014220.3C;BraA07g028510.3C;BraA07g013970.3C;BraA09g014570.3C;BraA03g044410.3C;BraA01g036720.3C;BraA07g011950.3C;BraA01g010120.3C;BraA03g044530.3C;BraA05g029030.3C;BraA05g028370.3C;BraA09g004340.3C;BraA02g015160.3C;BraA05g017040.3C;BraA02g040820.3C;BraA02g0…	0.365851
GO:0004335	galactokinase activity	molecular_function	BraA01g020740.3C;BraA08g011610.3C;BraA05g012310.3C;BraA10g024580.3C;BraA03g030380.3C;BraA10g000200.3C;BraA10g026520.3C;BraA10g000190.3C;BraA04g001400.3C;BraA07g013320.3C;BraA10g024590.3C;BraA01g041960.3C;BraA05g038870.3C;BraA09g066040.3C;BraA10g013940.3C;BraA03g032760.3C	0.367518
GO:0005337	nucleoside transmembrane transporter activity	molecular_function	BraA02g019740.3C;BraA09g025060.3C;BraA06g016280.3C;BraA02g027510.3C;BraA09g025050.3C;BraA10g001340.3C;BraA02g027500.3C;BraA07g005910.3C;BraA01g029360.3C;BraA07g005860.3C;BraA09g025070.3C;BraA07g005940.3C;BraA09g025040.3C;BraA01g029370.3C;BraA08g027630.3C;BraA09g025030.3C	0.367518
GO:0004630	phospholipase D activity	molecular_function	BraA05g017670.3C;BraA03g027680.3C;BraA08g007450.3C;BraA03g027700.3C;BraA01g042490.3C;BraA03g059700.3C;BraA06g000720.3C;BraA05g030480.3C;BraA08g002130.3C;BraA06g032680.3C;BraA08g020580.3C;BraA03g027710.3C;BraA10g000160.3C;BraA02g013710.3C;BraA03g040130.3C;BraA02g026380.3C	0.367518
GO:0000045	autophagosome assembly	biological_process	BraA03g056180.3C;BraA04g022550.3C;BraA04g028920.3C;BraA05g033070.3C;BraA02g006950.3C;BraA07g025220.3C;BraA07g024790.3C;BraA09g052060.3C;BraA08g017920.3C;BraA03g002010.3C;BraA05g013480.3C;BraA10g023330.3C;BraA03g007380.3C;BraA05g028170.3C;BraA03g055830.3C;BraA10g022680.3C;BraA09g009280.3C;BraA01g006990.3C;BraA07g016990.3C;BraA09g051250.3C;BraA09g041720.3C	0.374667
GO:0005388	calcium-transporting ATPase activity	molecular_function	BraA01g016730.3C;BraA02g036840.3C;BraA01g031260.3C;BraA09g047950.3C;BraA05g038260.3C;BraA08g021580.3C;BraA02g012500.3C;BraA05g024290.3C;BraA09g054470.3C;BraA03g055330.3C;BraA01g016760.3C;BraA10g014990.3C;BraA01g032470.3C;BraA06g004970.3C;BraA05g025950.3C;BraA03g060900.3C;BraA01g007830.3C;BraA09g000940.3C;BraA08g010240.3C;BraA07g002320.3C;BraA07g022810.3C	0.374667
GO:0008168	methyltransferase activity	molecular_function	BraA02g005550.3C;BraA10g007230.3C;BraA07g034420.3C;BraA07g034400.3C;BraA06g037010.3C;BraA02g017120.3C;BraA01g002590.3C;BraA07g019420.3C;BraA03g008370.3C;BraA07g034410.3C;BraA04g030400.3C;BraA04g008100.3C;BraA09g007660.3C;BraA08g030580.3C;BraA01g035300.3C;BraA07g004430.3C;BraA09g058270.3C;BraA09g054780.3C;BraA10g021940.3C;BraA03g008360.3C;BraA07g025380.3C	0.374667
GO:0000027	ribosomal large subunit assembly	biological_process	BraA04g004750.3C;BraA06g025280.3C;BraA02g017440.3C;BraA01g042450.3C;BraA04g002630.3C;BraA03g041610.3C;BraA04g004800.3C;BraA09g007100.3C;BraA01g010250.3C;BraA03g041620.3C;BraA07g034620.3C;BraA09g019260.3C;BraA03g048450.3C;BraA02g029780.3C;BraA09g044070.3C;BraA03g036940.3C;BraA04g006490.3C;BraA03g029290.3C;BraA07g021060.3C;BraA03g059460.3C;BraA09g059450.3C;BraA02g019380.3C;BraA06g042320.3C;BraA05g0…	0.381497
GO:0005789	endoplasmic reticulum membrane	cellular_component	BraA02g028710.3C;BraA05g036520.3C;BraA01g022620.3C;BraA09g064150.3C;BraA09g064140.3C;BraA09g028090.3C;BraA08g032970.3C;BraA10g004760.3C;BraA10g028030.3C;BraA09g014710.3C;BraA06g005880.3C;BraA02g028180.3C;BraA09g032060.3C;BraA09g064130.3C;BraA08g034060.3C;BraA06g028950.3C;BraA04g031700.3C;BraA02g036010.3C;BraA01g011420.3C;BraA10g029670.3C;BraA04g012980.3C;BraA09g062620.3C;BraA07g004190.3C;BraA05g0…	0.38178
GO:0003680	AT DNA binding	molecular_function	BraA05g005190.3C;BraA08g027590.3C;BraA04g031520.3C;BraA07g015480.3C;BraA06g016350.3C	0.382578
GO:0000146	microfilament motor activity	molecular_function	BraA08g035240.3C;BraA08g033020.3C;BraA08g035250.3C;BraA06g005830.3C;BraA09g019060.3C	0.382578
GO:0004029	aldehyde dehydrogenase (NAD) activity	molecular_function	BraA09g028690.3C;BraA04g017820.3C;BraA09g053780.3C;BraA07g038630.3C;BraA05g028850.3C	0.382578
GO:0003860	3-hydroxyisobutyryl-CoA hydrolase activity	molecular_function	BraA02g045840.3C;BraA04g020930.3C;BraA05g014780.3C;BraA04g021030.3C;BraA05g014750.3C	0.382578
GO:0004758	serine C-palmitoyltransferase activity	molecular_function	BraA01g024090.3C;BraA03g060040.3C;BraA01g002290.3C;BraA06g024750.3C;BraA06g024740.3C	0.382578
GO:0003002	regionalization	biological_process	BraA02g025390.3C;BraA09g063160.3C;BraA08g033480.3C;BraA07g042500.3C;BraA07g026150.3C	0.382578
GO:0005244	voltage-gated ion channel activity	molecular_function	BraA08g034720.3C;BraA10g003230.3C;BraA04g014710.3C;BraA08g023130.3C;BraA01g021470.3C	0.382578
GO:0006950	response to stress	biological_process	BraA10g022600.3C;BraA10g007620.3C;BraA04g006460.3C;BraA07g034080.3C;BraA08g005810.3C	0.382578
GO:0000727	double-strand break repair via break-induced replication	biological_process	BraA03g041450.3C;BraA07g008010.3C;BraA07g002580.3C;BraA06g035040.3C;BraA03g035340.3C	0.382578
GO:0004837	tyrosine decarboxylase activity	molecular_function	BraA09g012250.3C;BraA07g000490.3C;BraA07g000480.3C;BraA09g012270.3C;BraA09g056260.3C	0.382578
GO:0000938	GARP complex	cellular_component	BraA01g010820.3C;BraA09g002160.3C;BraA01g007090.3C;BraA05g018980.3C;BraA03g048840.3C	0.382578
GO:0000055	ribosomal large subunit export from nucleus	biological_process	BraA09g060290.3C;BraA01g041290.3C;BraA10g028470.3C;BraA02g035920.3C;BraA07g031880.3C	0.382578
GO:0003887	DNA-directed DNA polymerase activity	molecular_function	BraA03g052070.3C;BraA03g025200.3C;BraA07g041740.3C;BraA01g015540.3C;BraA06g010630.3C	0.382578
GO:0003863	3-methyl-2-oxobutanoate dehydrogenase (2-methylpropanoyl-transferring) activity	molecular_function	BraA02g035700.3C;BraA08g000670.3C;BraA06g016890.3C;BraA03g003830.3C;BraA08g027370.3C	0.382578
GO:0008840	4-hydroxy-tetrahydrodipicolinate synthase	molecular_function	BraA04g001470.3C;BraA04g031530.3C;BraA09g050620.3C;BraA09g050630.3C;BraA05g005200.3C	0.382578
GO:0000923	equatorial microtubule organizing center	cellular_component	BraA10g029370.3C;BraA02g002100.3C;BraA10g029360.3C;BraA09g044760.3C;BraA02g026050.3C	0.382578
GO:0004838	L-tyrosine:2-oxoglutarate aminotransferase activity	molecular_function	BraA03g025500.3C;BraA09g053440.3C;BraA09g056110.3C;BraA05g015170.3C;BraA02g014250.3C	0.382578
GO:0005338	nucleotide-sugar transmembrane transporter activity	molecular_function	BraA09g019240.3C;BraA01g029920.3C;BraA03g027070.3C;BraA09g031310.3C;BraA05g022310.3C	0.382578
GO:0000439	core TFIIH complex	cellular_component	BraA02g019080.3C;BraA08g030980.3C;BraA06g009260.3C;BraA01g019540.3C;BraA08g034450.3C	0.382578
GO:0000910	cytokinesis	biological_process	BraA05g017350.3C;BraA02g035240.3C;BraA06g040010.3C;BraA01g025940.3C;BraA02g035250.3C	0.382578
GO:0006779	porphyrin-containing compound biosynthetic process	biological_process	BraA09g007910.3C;BraA01g024770.3C;BraA06g008970.3C;BraA06g027050.3C;BraA09g062130.3C	0.382578
GO:0004807	triose-phosphate isomerase activity	molecular_function	BraA04g004600.3C;BraA07g022090.3C;BraA04g015400.3C;BraA04g004590.3C;BraA09g046260.3C	0.382578
GO:0004445	inositol-polyphosphate 5-phosphatase activity	molecular_function	BraA05g011940.3C;BraA10g004480.3C;BraA03g023120.3C;BraA08g034280.3C;BraA09g064330.3C	0.382578
GO:0006486	protein glycosylation	biological_process	BraA02g011440.3C;BraA06g030380.3C;BraA10g016660.3C;BraA10g018260.3C;BraA10g018250.3C	0.382578
GO:0003988	acetyl-CoA C-acyltransferase activity	molecular_function	BraA04g023760.3C;BraA05g011680.3C;BraA03g017600.3C;BraA02g039900.3C;BraA08g034700.3C	0.382578
GO:0003861	3-isopropylmalate dehydratase activity	molecular_function	BraA04g008640.3C;BraA05g003390.3C;BraA08g006460.3C;BraA05g003380.3C;BraA03g022560.3C	0.382578
GO:0004512	inositol-3-phosphate synthase activity	molecular_function	BraA09g055030.3C;BraA02g003370.3C;BraA01g000700.3C;BraA04g016220.3C;BraA10g027710.3C	0.382578
GO:0005432	calcium:sodium antiporter activity	molecular_function	BraA10g022240.3C;BraA05g000330.3C;BraA02g007270.3C;BraA02g007290.3C;BraA10g022220.3C	0.382578
GO:0000060	protein import into nucleus, translocation	biological_process	BraA03g016000.3C;BraA04g031640.3C;BraA03g023790.3C;BraA03g051930.3C;BraA05g005370.3C	0.382578
GO:0003676	nucleic acid binding	molecular_function	BraA10g032810.3C;BraA03g001960.3C;BraA09g042380.3C;BraA07g006150.3C;BraA06g039590.3C;BraA01g010970.3C;BraA09g015520.3C;BraA07g014350.3C;BraA09g051740.3C;BraA07g010370.3C;BraA03g024660.3C;BraA07g001000.3C;BraA03g003170.3C;BraA08g007880.3C;BraA02g023190.3C;BraA01g033800.3C;BraA10g012020.3C;BraA03g014930.3C;BraA04g019130.3C;BraA07g014910.3C;BraA10g010690.3C;BraA07g042790.3C;BraA10g014800.3C;BraA09g0…	0.382978
GO:0001664	G-protein coupled receptor binding	molecular_function	BraA05g023840.3C;BraA01g003860.3C;BraA09g052740.3C;BraA04g017230.3C;BraA09g033240.3C;BraA08g016010.3C;BraA10g015780.3C;BraA03g058800.3C;BraA06g026330.3C;BraA01g003870.3C	0.402253
GO:0000307	cyclin-dependent protein kinase holoenzyme complex	cellular_component	BraA03g011410.3C;BraA01g010840.3C;BraA07g012040.3C;BraA08g024790.3C;BraA09g037340.3C;BraA02g039780.3C;BraA03g020270.3C;BraA07g012460.3C;BraA09g005110.3C;BraA01g028190.3C	0.402253
GO:0004601	peroxidase activity	molecular_function	BraA10g003850.3C;BraA09g013170.3C;BraA01g004640.3C;BraA07g017670.3C;BraA06g041400.3C;BraA02g009770.3C;BraA01g001350.3C;BraA09g030190.3C;BraA09g008980.3C;BraA02g007250.3C;BraA09g027240.3C;BraA03g002070.3C;BraA03g020080.3C;BraA03g056260.3C;BraA02g044450.3C;BraA05g025370.3C;BraA02g039310.3C;BraA01g015810.3C;BraA09g059310.3C;BraA06g017920.3C;BraA05g011000.3C;BraA03g026770.3C;BraA06g010710.3C;BraA02g0…	0.403476
GO:0000911	cytokinesis by cell plate formation	biological_process	BraA04g001540.3C;BraA06g018170.3C;BraA10g027050.3C;BraA07g020830.3C;BraA10g012510.3C;BraA04g014650.3C;BraA06g007350.3C;BraA02g013900.3C;BraA03g028760.3C;BraA03g003210.3C;BraA03g029920.3C;BraA06g004080.3C;BraA06g023810.3C;BraA09g051180.3C;BraA10g021440.3C;BraA01g028670.3C;BraA03g016210.3C;BraA06g018250.3C;BraA05g011800.3C;BraA09g050490.3C;BraA03g017470.3C;BraA06g010090.3C;BraA09g001350.3C;BraA01g0…	0.406987
GO:0005089	Rho guanyl-nucleotide exchange factor activity	molecular_function	BraA07g025500.3C;BraA03g009160.3C;BraA01g036130.3C;BraA02g008270.3C;BraA09g033490.3C;BraA01g036120.3C;BraA05g017870.3C;BraA10g028720.3C;BraA03g030090.3C;BraA05g005520.3C;BraA01g020500.3C;BraA06g002110.3C;BraA10g033580.3C;BraA10g020780.3C;BraA09g046470.3C	0.408222
GO:0016020	membrane	cellular_component	BraA07g004040.3C;BraA09g053390.3C;BraA09g031080.3C;BraA07g008650.3C;BraA10g028680.3C;BraA04g023820.3C;BraA04g006520.3C;BraA10g028190.3C;BraA01g041440.3C;BraA03g041160.3C;BraA07g003070.3C;BraA03g026310.3C;BraA02g001640.3C;BraA03g043440.3C;BraA08g007300.3C;BraA06g030100.3C;BraA09g058360.3C;BraA05g031690.3C;BraA04g006530.3C;BraA03g033340.3C	0.410122
GO:0005381	iron ion transmembrane transporter activity	molecular_function	BraA07g040340.3C;BraA01g028630.3C;BraA01g010980.3C;BraA03g048890.3C;BraA01g011010.3C;BraA01g010990.3C;BraA09g010260.3C;BraA07g025990.3C;BraA09g061640.3C;BraA01g011020.3C;BraA07g042710.3C;BraA06g040200.3C;BraA06g016610.3C;BraA01g018700.3C;BraA08g027450.3C;BraA09g021020.3C;BraA07g015310.3C;BraA01g018710.3C;BraA01g011000.3C;BraA02g025530.3C;BraA02g031570.3C;BraA09g016600.3C;BraA03g048930.3C;BraA02g0…	0.410299
GO:0000226	microtubule cytoskeleton organization	biological_process	BraA10g013220.3C;BraA01g017510.3C;BraA03g008650.3C;BraA03g023260.3C;BraA05g019480.3C;BraA03g018520.3C;BraA06g025590.3C;BraA04g031250.3C;BraA03g053290.3C;BraA10g010270.3C;BraA04g027330.3C;BraA06g025780.3C;BraA03g017450.3C;BraA09g045880.3C;BraA09g033230.3C;BraA03g008000.3C;BraA03g025730.3C;BraA07g002370.3C;BraA07g021940.3C;BraA07g027200.3C;BraA02g007770.3C;BraA03g061250.3C;BraA01g032880.3C;BraA09g0…	0.426783
GO:0005216	ion channel activity	molecular_function	BraA04g018100.3C;BraA10g027400.3C;BraA01g027270.3C;BraA07g023290.3C;BraA01g023630.3C;BraA01g028180.3C;BraA10g011490.3C;BraA03g060170.3C;BraA03g029750.3C;BraA03g029180.3C;BraA01g027550.3C;BraA10g013620.3C;BraA05g029910.3C;BraA06g000100.3C;BraA05g001360.3C;BraA10g024360.3C;BraA02g036340.3C;BraA01g007370.3C;BraA02g014790.3C;BraA03g004310.3C;BraA10g024010.3C;BraA06g012030.3C;BraA03g038060.3C;BraA04g0…	0.439815
GO:0004683	calmodulin-dependent protein kinase activity	molecular_function	BraA01g003080.3C;BraA08g030830.3C;BraA07g017690.3C;BraA06g044950.3C;BraA09g025610.3C;BraA09g009710.3C;BraA04g029100.3C;BraA05g013210.3C;BraA01g023000.3C;BraA09g025600.3C;BraA03g021800.3C;BraA09g060630.3C;BraA06g031040.3C;BraA03g039380.3C;BraA07g039450.3C;BraA09g041690.3C;BraA06g009060.3C;BraA10g019930.3C;BraA04g025500.3C;BraA02g042460.3C;BraA03g064470.3C;BraA05g006890.3C;BraA03g059380.3C;BraA09g0…	0.439815
GO:0003714	transcription corepressor activity	molecular_function	BraA08g028330.3C;BraA07g028010.3C;BraA02g020000.3C;BraA05g029670.3C;BraA08g017000.3C;BraA01g034810.3C;BraA07g035430.3C;BraA01g005510.3C;BraA04g024740.3C;BraA08g029290.3C;BraA07g029850.3C;BraA10g025540.3C;BraA02g022540.3C;BraA09g057760.3C;BraA03g005650.3C;BraA02g004740.3C;BraA07g036860.3C;BraA10g019770.3C;BraA09g034900.3C;BraA06g013190.3C;BraA07g038660.3C;BraA05g010510.3C;BraA02g021020.3C;BraA09g0…	0.443528
GO:0006813	potassium ion transport	biological_process	BraA09g025530.3C;BraA09g066290.3C;BraA03g063770.3C;BraA10g000230.3C;BraA09g065510.3C;BraA07g001170.3C;BraA02g004150.3C;BraA09g056520.3C;BraA07g001230.3C;BraA09g025340.3C;BraA10g000240.3C;BraA07g001270.3C;BraA07g003890.3C;BraA07g001180.3C	0.451746
GO:0000184	nuclear-transcribed mRNA catabolic process, nonsense-mediated decay	biological_process	BraA03g032720.3C;BraA01g044800.3C;BraA10g020920.3C;BraA03g030450.3C;BraA09g007680.3C;BraA09g022460.3C;BraA08g000940.3C;BraA02g033470.3C;BraA02g008160.3C	0.456476
GO:0004602	glutathione peroxidase activity	molecular_function	BraA03g016820.3C;BraA10g006200.3C;BraA05g013090.3C;BraA09g026940.3C;BraA02g028350.3C;BraA04g032410.3C;BraA05g000010.3C;BraA09g053340.3C;BraA03g057030.3C	0.456476
GO:0003989	acetyl-CoA carboxylase activity	molecular_function	BraA03g019880.3C;BraA06g007070.3C;BraA03g006900.3C;BraA09g061970.3C;BraA10g023970.3C;BraA06g004850.3C;BraA05g007560.3C;BraA08g007750.3C;BraA03g007460.3C	0.456476
GO:0004845	uracil phosphoribosyltransferase activity	molecular_function	BraA01g017260.3C;BraA04g013500.3C;BraA09g033030.3C;BraA02g037490.3C;BraA08g000320.3C;BraA09g003220.3C;BraA07g021470.3C;BraA06g037800.3C;BraA10g013890.3C	0.456476
GO:0004521	endoribonuclease activity	molecular_function	BraA09g021530.3C;BraA01g019920.3C;BraA06g031700.3C;BraA06g030450.3C;BraA01g033050.3C;BraA03g031640.3C;BraA01g019930.3C;BraA03g039370.3C;BraA05g042580.3C	0.456476
GO:0008080	N-acetyltransferase activity	molecular_function	BraA03g054110.3C;BraA09g039290.3C;BraA10g001780.3C;BraA01g018850.3C;BraA04g017000.3C;BraA04g011200.3C;BraA07g029290.3C;BraA08g035480.3C;BraA07g006870.3C	0.456476
GO:0000244	spliceosomal tri-snRNP complex assembly	biological_process	BraA05g006920.3C;BraA01g011110.3C;BraA04g022410.3C;BraA08g016560.3C;BraA01g028100.3C;BraA09g002560.3C;BraA05g006910.3C;BraA06g011330.3C;BraA07g025630.3C	0.456476
GO:0003824	catalytic activity	molecular_function	BraA03g001110.3C;BraA03g012600.3C;BraA06g018400.3C;BraA05g012490.3C;BraA02g037120.3C;BraA06g009890.3C;BraA01g036180.3C;BraA03g037880.3C;BraA09g052130.3C;BraA07g038200.3C;BraA08g006880.3C;BraA04g026520.3C;BraA03g036690.3C;BraA01g033430.3C;BraA02g037200.3C;BraA09g062890.3C;BraA03g055900.3C;BraA05g011830.3C;BraA01g023010.3C;BraA04g003260.3C;BraA10g001020.3C;BraA06g017480.3C;BraA01g008090.3C;BraA09g0…	0.459894
GO:0000381	regulation of alternative mRNA splicing, via spliceosome	biological_process	BraA04g017070.3C;BraA09g045160.3C;BraA07g021620.3C;BraA07g021630.3C	0.463639
GO:0000991	transcription factor activity, core RNA polymerase II binding	molecular_function	BraA03g045940.3C;BraA06g015330.3C;BraA03g045960.3C;BraA09g043480.3C	0.463639
GO:0004818	glutamate-tRNA ligase activity	molecular_function	BraA01g017450.3C;BraA09g005490.3C;BraA06g033370.3C;BraA02g041320.3C	0.463639
GO:0000215	tRNA 2'-phosphotransferase activity	molecular_function	BraA05g005060.3C;BraA05g005090.3C;BraA05g005000.3C;BraA05g005030.3C	0.463639
GO:0001561	fatty acid alpha-oxidation	biological_process	BraA07g037710.3C;BraA07g028600.3C;BraA05g040640.3C;BraA02g021870.3C	0.463639
GO:0004476	mannose-6-phosphate isomerase activity	molecular_function	BraA02g017380.3C;BraA01g044070.3C;BraA09g041280.3C;BraA05g041300.3C	0.463639
GO:0004802	transketolase activity	molecular_function	BraA09g050480.3C;BraA05g005050.3C;BraA07g024370.3C;BraA04g001550.3C	0.463639
GO:0000769	syncytium formation by mitosis without cytokinesis	biological_process	BraA06g017630.3C;BraA09g003810.3C;BraA02g038760.3C;BraA06g036350.3C	0.463639
GO:0030170	pyridoxal phosphate binding	molecular_function	BraA05g025100.3C;BraA01g031790.3C;BraA05g025080.3C;BraA05g025070.3C	0.463639
GO:0000234	phosphoethanolamine N-methyltransferase activity	molecular_function	BraA04g010470.3C;BraA05g029550.3C;BraA07g028670.3C;BraA06g004430.3C	0.463639
GO:0004385	guanylate kinase activity	molecular_function	BraA04g003220.3C;BraA09g048130.3C;BraA07g022930.3C;BraA05g039160.3C	0.463639
GO:0004832	valine-tRNA ligase activity	molecular_function	BraA07g002240.3C;BraA10g023070.3C;BraA08g024380.3C;BraA07g011700.3C	0.463639
GO:0000126	transcription factor TFIIIB complex	cellular_component	BraA08g022600.3C;BraA03g033870.3C;BraA05g000380.3C;BraA03g033880.3C	0.463639
GO:0006855	drug transmembrane transport	biological_process	BraA03g052700.3C;BraA01g016370.3C;BraA08g014790.3C;BraA08g019990.3C	0.463639
GO:0001736	establishment of planar polarity	biological_process	BraA04g027030.3C;BraA05g007500.3C;BraA03g019900.3C;BraA10g032720.3C	0.463639
GO:0000339	RNA cap binding	molecular_function	BraA03g048010.3C;BraA03g042370.3C;BraA01g009620.3C;BraA08g012700.3C	0.463639
GO:0003983	UTP:glucose-1-phosphate uridylyltransferase activity	molecular_function	BraA09g053110.3C;BraA03g007910.3C;BraA01g043720.3C;BraA05g041780.3C	0.463639
GO:0004128	cytochrome-b5 reductase activity, acting on NAD(P)H	molecular_function	BraA03g009420.3C;BraA03g008130.3C;BraA02g007210.3C;BraA10g022310.3C	0.463639
GO:0004103	choline kinase activity	molecular_function	BraA07g036140.3C;BraA09g031250.3C;BraA07g038230.3C;BraA09g029920.3C	0.463639
GO:0004018	N6-(1,2-dicarboxyethyl)AMP AMP-lyase (fumarate-forming) activity	molecular_function	BraA03g048270.3C;BraA08g012930.3C;BraA04g012260.3C;BraA04g012190.3C	0.463639
GO:0005274	allantoin uptake transmembrane transporter activity	molecular_function	BraA06g039220.3C;BraA09g038340.3C;BraA09g024060.3C;BraA02g036140.3C	0.463639
GO:0010227	floral organ abscission	biological_process	BraA01g001670.3C;BraA07g018940.3C;BraA03g060550.3C;BraA02g010430.3C	0.463639
GO:0006397	mRNA processing	biological_process	BraA09g048030.3C;BraA09g021170.3C;BraA02g031770.3C;BraA01g044440.3C	0.463639
GO:0004140	dephospho-CoA kinase activity	molecular_function	BraA05g022530.3C;BraA07g002470.3C;BraA07g018230.3C;BraA03g025100.3C	0.463639
GO:0001560	regulation of cell growth by extracellular stimulus	biological_process	BraA07g000220.3C;BraA09g012050.3C;BraA02g011720.3C;BraA07g001360.3C	0.463639
GO:0034219	carbohydrate transmembrane transport	biological_process	BraA03g057210.3C;BraA08g017160.3C;BraA01g005790.3C;BraA07g005640.3C	0.463639
GO:0000077	DNA damage checkpoint	biological_process	BraA01g024570.3C;BraA08g000050.3C;BraA05g005220.3C;BraA07g012870.3C	0.463639
GO:0009536	plastid	cellular_component	BraA06g023060.3C;BraA06g023070.3C;BraA09g030470.3C;BraA06g023040.3C	0.463639
GO:0004560	alpha-L-fucosidase activity	molecular_function	BraA04g020110.3C;BraA02g017900.3C;BraA07g033140.3C;BraA02g037970.3C	0.463639
GO:0004750	ribulose-phosphate 3-epimerase activity	molecular_function	BraA10g029620.3C;BraA03g044370.3C;BraA02g043170.3C;BraA09g013040.3C	0.463639
GO:0005047	signal recognition particle binding	molecular_function	BraA10g028460.3C;BraA07g001970.3C;BraA06g024880.3C;BraA06g017960.3C	0.463639
GO:0004375	glycine dehydrogenase (decarboxylating) activity	molecular_function	BraA03g018310.3C;BraA05g010040.3C;BraA01g004980.3C;BraA04g024990.3C	0.463639
GO:0001056	RNA polymerase III activity	molecular_function	BraA06g042680.3C;BraA09g063720.3C;BraA02g010480.3C;BraA08g033830.3C	0.463639
GO:0004337	geranyltranstransferase activity	molecular_function	BraA01g014350.3C;BraA08g020880.3C;BraA03g051340.3C;BraA08g020870.3C	0.463639
GO:0000914	phragmoplast assembly	biological_process	BraA01g042710.3C;BraA07g009420.3C;BraA01g030320.3C;BraA05g039880.3C	0.463639
GO:0004637	phosphoribosylamine-glycine ligase activity	molecular_function	BraA08g032380.3C;BraA07g004450.3C;BraA03g022220.3C;BraA06g006740.3C	0.463639
GO:0004146	dihydrofolate reductase activity	molecular_function	BraA03g043050.3C;BraA03g025840.3C;BraA03g058890.3C;BraA01g003720.3C	0.463639
GO:0008540	proteasome regulatory particle, base subcomplex	cellular_component	BraA05g016710.3C;BraA05g006370.3C;BraA05g031970.3C;BraA02g022780.3C	0.463639
GO:0005985	sucrose metabolic process	biological_process	BraA09g035680.3C;BraA09g044960.3C;BraA01g025040.3C;BraA04g005700.3C	0.463639
GO:0000179	rRNA (adenine-N6,N6-)-dimethyltransferase activity	molecular_function	BraA08g010530.3C;BraA07g010480.3C;BraA09g066300.3C;BraA07g010500.3C	0.463639
GO:0003977	UDP-N-acetylglucosamine diphosphorylase activity	molecular_function	BraA09g046780.3C;BraA05g010090.3C;BraA08g010260.3C;BraA09g033870.3C	0.463639
GO:0000325	plant-type vacuole	cellular_component	BraA01g038370.3C;BraA02g024930.3C;BraA04g002590.3C;BraA03g026210.3C;BraA09g052000.3C;BraA07g023570.3C;BraA03g027540.3C;BraA02g028510.3C;BraA09g060900.3C;BraA04g029340.3C;BraA07g041910.3C;BraA08g001300.3C;BraA03g031840.3C;BraA05g020280.3C;BraA02g029730.3C;BraA02g000390.3C;BraA03g028460.3C;BraA03g031820.3C;BraA01g004530.3C;BraA03g003860.3C;BraA03g035760.3C;BraA06g039940.3C;BraA09g034670.3C;BraA06g0…	0.464455
GO:0003723	RNA binding	molecular_function	BraA01g032960.3C;BraA10g017810.3C;BraA01g038580.3C;BraA07g000170.3C;BraA06g011970.3C;BraA09g006700.3C;BraA04g029920.3C;BraA04g018560.3C;BraA07g036720.3C;BraA03g052800.3C;BraA08g028960.3C;BraA07g015440.3C;BraA09g033960.3C;BraA10g010780.3C;BraA10g021980.3C;BraA10g030670.3C;BraA09g059540.3C;BraA07g039460.3C;BraA09g048890.3C;BraA08g020530.3C;BraA06g005560.3C;BraA05g034030.3C;BraA03g002840.3C;BraA09g0…	0.464537
GO:0003756	protein disulfide isomerase activity	molecular_function	BraA07g036650.3C;BraA03g039420.3C;BraA03g030210.3C;BraA01g043410.3C;BraA03g008340.3C;BraA03g031470.3C;BraA08g019550.3C;BraA07g040880.3C;BraA08g002210.3C;BraA04g023650.3C;BraA10g003560.3C;BraA06g020900.3C;BraA09g031910.3C;BraA05g026660.3C;BraA09g045830.3C;BraA08g008010.3C;BraA02g034540.3C;BraA03g053500.3C;BraA02g024160.3C;BraA05g028140.3C;BraA05g000460.3C;BraA05g022150.3C;BraA02g024110.3C;BraA10g0…	0.465021
GO:0008152	metabolic process	biological_process	BraA08g022010.3C;BraA06g024490.3C;BraA09g020720.3C;BraA02g036200.3C;BraA06g012750.3C;BraA01g008000.3C;BraA09g045840.3C;BraA02g000440.3C;BraA06g018570.3C;BraA08g029510.3C;BraA07g025450.3C;BraA05g007890.3C;BraA09g018640.3C;BraA10g033380.3C;BraA06g039130.3C;BraA03g001680.3C;BraA10g031670.3C;BraA04g029150.3C	0.486589
GO:0003729	mRNA binding	molecular_function	BraA01g007890.3C;BraA06g011370.3C;BraA08g020030.3C;BraA02g024820.3C;BraA09g047350.3C;BraA06g004220.3C;BraA08g029120.3C;BraA02g015710.3C;BraA04g000270.3C;BraA04g007150.3C;BraA01g001730.3C;BraA08g005630.3C;BraA01g016300.3C;BraA08g004120.3C;BraA10g017700.3C;BraA07g041730.3C;BraA10g032340.3C;BraA05g020010.3C	0.486589
GO:0003684	damaged DNA binding	molecular_function	BraA06g003570.3C;BraA10g023520.3C;BraA04g011090.3C;BraA03g011650.3C;BraA06g012160.3C;BraA06g017250.3C;BraA09g052750.3C;BraA04g019230.3C;BraA09g058350.3C;BraA07g019540.3C;BraA10g023530.3C;BraA03g026270.3C;BraA05g017740.3C;BraA09g052770.3C;BraA06g042830.3C;BraA08g014540.3C;BraA06g042820.3C;BraA02g011460.3C	0.486589
GO:0000243	commitment complex	cellular_component	BraA06g041910.3C;BraA06g035680.3C;BraA05g038090.3C;BraA05g033200.3C;BraA03g028880.3C;BraA03g033350.3C;BraA08g035070.3C;BraA03g028690.3C;BraA10g002590.3C;BraA08g027770.3C;BraA01g041430.3C;BraA06g016070.3C;BraA02g030020.3C	0.497898
GO:0004143	diacylglycerol kinase activity	molecular_function	BraA03g012300.3C;BraA04g031980.3C;BraA02g002520.3C;BraA03g003240.3C;BraA07g001990.3C;BraA09g011570.3C;BraA06g027200.3C;BraA01g007390.3C;BraA09g012380.3C;BraA06g030890.3C;BraA01g035520.3C;BraA02g042490.3C;BraA03g054200.3C	0.497898
GO:0000079	regulation of cyclin-dependent protein serine/threonine kinase activity	biological_process	BraA05g004870.3C;BraA01g008560.3C;BraA03g023450.3C;BraA09g052400.3C;BraA05g004620.3C;BraA09g050340.3C;BraA03g023540.3C;BraA03g044680.3C;BraA03g044700.3C;BraA01g042720.3C;BraA10g029800.3C;BraA05g039890.3C;BraA07g032350.3C	0.497898
GO:0005516	calmodulin binding	molecular_function	BraA03g012990.3C;BraA07g032650.3C;BraA07g008080.3C;BraA01g040610.3C;BraA04g006660.3C;BraA05g007090.3C;BraA01g019360.3C;BraA07g003540.3C;BraA06g025540.3C;BraA03g037560.3C;BraA02g012560.3C;BraA06g022270.3C;BraA06g010540.3C;BraA03g006830.3C;BraA09g061390.3C;BraA09g016310.3C;BraA02g027180.3C;BraA02g038720.3C;BraA07g023420.3C;BraA04g024180.3C;BraA07g019800.3C;BraA02g035790.3C;BraA10g014250.3C;BraA03g0…	0.50303
GO:0000103	sulfate assimilation	biological_process	BraA03g049900.3C;BraA03g045390.3C;BraA01g000790.3C;BraA06g015540.3C;BraA07g030170.3C;BraA03g040590.3C;BraA10g029380.3C;BraA03g061590.3C;BraA10g032080.3C;BraA08g009650.3C;BraA09g062720.3C;BraA09g008910.3C;BraA01g012700.3C;BraA03g036900.3C;BraA01g044200.3C;BraA05g031740.3C;BraA09g065270.3C;BraA06g005720.3C;BraA05g038730.3C;BraA03g044400.3C;BraA09g042280.3C;BraA01g001910.3C;BraA03g034190.3C;BraA09g0…	0.509221
GO:0004864	protein phosphatase inhibitor activity	molecular_function	BraA09g052870.3C;BraA10g028350.3C;BraA03g029760.3C;BraA02g014770.3C;BraA03g047820.3C;BraA09g000060.3C;BraA04g027160.3C;BraA03g014680.3C;BraA09g022320.3C;BraA02g021410.3C;BraA01g018740.3C;BraA06g041650.3C;BraA04g028450.3C;BraA03g020010.3C;BraA01g009450.3C;BraA06g042180.3C;BraA07g024750.3C;BraA10g011520.3C;BraA08g012630.3C;BraA03g021430.3C;BraA01g010160.3C;BraA05g005770.3C	0.513673
GO:0004470	malic enzyme activity	molecular_function	BraA03g030040.3C;BraA06g032990.3C;BraA09g000510.3C;BraA07g000930.3C;BraA09g010020.3C;BraA03g058340.3C;BraA02g004070.3C;BraA03g004740.3C	0.515615
GO:0000014	single-stranded DNA endodeoxyribonuclease activity	molecular_function	BraA08g014360.3C;BraA08g014350.3C;BraA09g061420.3C;BraA08g031760.3C;BraA04g013750.3C;BraA03g017010.3C;BraA07g033440.3C;BraA04g007190.3C	0.515615
GO:0005643	nuclear pore	cellular_component	BraA07g042260.3C;BraA07g026300.3C;BraA02g000720.3C;BraA02g040100.3C;BraA05g022750.3C;BraA02g017450.3C;BraA07g020150.3C;BraA05g039610.3C	0.515615
GO:0004402	histone acetyltransferase activity	molecular_function	BraA10g022990.3C;BraA05g041580.3C;BraA09g006840.3C;BraA02g036370.3C;BraA02g042840.3C;BraA07g026970.3C;BraA03g044020.3C;BraA03g007670.3C	0.515615
GO:0005094	Rho GDP-dissociation inhibitor activity	molecular_function	BraA08g031220.3C;BraA06g009520.3C;BraA03g063420.3C;BraA09g015840.3C;BraA05g037850.3C;BraA09g012530.3C;BraA09g061000.3C;BraA01g041260.3C	0.515615
GO:0004664	prephenate dehydratase activity	molecular_function	BraA06g023470.3C;BraA08g031390.3C;BraA03g033370.3C;BraA04g019960.3C;BraA02g009880.3C;BraA09g062860.3C;BraA10g018830.3C;BraA05g038060.3C	0.515615
GO:0004386	helicase activity	molecular_function	BraA09g058090.3C;BraA06g005280.3C;BraA09g062970.3C;BraA01g009940.3C;BraA04g028880.3C;BraA04g005420.3C;BraA01g021120.3C;BraA10g028140.3C	0.515615
GO:0003689	DNA clamp loader activity	molecular_function	BraA06g039740.3C;BraA06g033830.3C;BraA02g035630.3C;BraA02g024100.3C;BraA07g027000.3C;BraA02g040850.3C;BraA09g012960.3C;BraA06g017220.3C	0.515615
GO:0000419	DNA-directed RNA polymerase V complex	cellular_component	BraA03g043080.3C;BraA06g017840.3C;BraA06g025000.3C;BraA03g040510.3C;BraA09g047760.3C;BraA06g031570.3C;BraA05g024530.3C;BraA09g027940.3C	0.515615
GO:0005622	intracellular	cellular_component	BraA03g007730.3C;BraA08g016190.3C;BraA06g004810.3C;BraA01g017610.3C;BraA03g057480.3C;BraA02g044220.3C;BraA06g025580.3C;BraA08g016880.3C;BraA07g003130.3C;BraA08g006500.3C;BraA07g015200.3C;BraA02g016240.3C;BraA07g043100.3C;BraA01g018580.3C;BraA03g026330.3C;BraA06g031350.3C;BraA09g024890.3C;BraA03g062240.3C;BraA07g040480.3C;BraA06g016870.3C;BraA01g023100.3C;BraA08g024610.3C;BraA10g004920.3C;BraA01g0…	0.517705
GO:0005315	inorganic phosphate transmembrane transporter activity	molecular_function	BraA09g019770.3C;BraA09g000620.3C;BraA05g014530.3C;BraA06g043800.3C;BraA06g019930.3C;BraA09g002880.3C;BraA04g025580.3C;BraA06g043770.3C;BraA02g008870.3C;BraA09g019840.3C;BraA04g026980.3C;BraA02g030600.3C;BraA02g030590.3C;BraA09g045520.3C;BraA02g030660.3C;BraA02g030630.3C;BraA09g019510.3C;BraA03g030140.3C;BraA02g013650.3C;BraA05g006850.3C;BraA02g030610.3C;BraA04g005250.3C;BraA05g006880.3C;BraA10g0…	0.524504
GO:0001510	RNA methylation	biological_process	BraA01g011690.3C;BraA10g009400.3C;BraA01g021210.3C;BraA01g009220.3C;BraA01g011680.3C;BraA06g019170.3C;BraA10g033700.3C;BraA03g046270.3C;BraA02g025740.3C;BraA03g050340.3C;BraA09g029720.3C;BraA06g032300.3C;BraA06g000170.3C;BraA04g023070.3C;BraA05g025730.3C;BraA09g054930.3C;BraA06g013060.3C	0.527207
GO:0000723	telomere maintenance	biological_process	BraA07g002530.3C;BraA05g016390.3C;BraA05g029740.3C;BraA05g026240.3C;BraA09g040430.3C;BraA08g010950.3C;BraA03g057670.3C;BraA10g029020.3C;BraA03g034700.3C;BraA02g021650.3C;BraA03g054400.3C;BraA01g032750.3C;BraA03g025080.3C;BraA03g049100.3C;BraA09g055210.3C;BraA02g005160.3C;BraA07g007090.3C;BraA09g043380.3C;BraA08g004790.3C;BraA03g005930.3C;BraA06g012800.3C;BraA05g026830.3C;BraA09g063360.3C;BraA02g0…	0.531969
GO:0004596	peptide alpha-N-acetyltransferase activity	molecular_function	BraA03g048390.3C;BraA01g023340.3C;BraA06g021410.3C;BraA06g023780.3C;BraA05g000240.3C;BraA01g001310.3C;BraA07g043030.3C;BraA05g007490.3C;BraA01g031130.3C;BraA02g025930.3C;BraA07g004770.3C;BraA04g018220.3C;BraA01g019040.3C;BraA03g060830.3C;BraA04g031730.3C;BraA07g042680.3C;BraA01g039640.3C;BraA10g016320.3C;BraA05g019890.3C;BraA07g025790.3C;BraA09g030410.3C;BraA03g020620.3C;BraA09g017120.3C;BraA08g0…	0.535967
GO:0004857	enzyme inhibitor activity	molecular_function	BraA01g015990.3C;BraA05g034760.3C;BraA06g000140.3C;BraA05g034730.3C;BraA05g034720.3C;BraA09g008340.3C;BraA01g039130.3C;BraA09g000800.3C;BraA06g006240.3C;BraA01g015980.3C;BraA09g052100.3C;BraA03g052340.3C;BraA02g002170.3C;BraA02g019020.3C;BraA09g039750.3C;BraA02g019860.3C;BraA06g004920.3C;BraA01g035450.3C;BraA02g027910.3C;BraA03g025650.3C;BraA06g017740.3C;BraA06g006290.3C;BraA03g013820.3C;BraA09g0…	0.543148
GO:0002161	aminoacyl-tRNA editing activity	molecular_function	BraA02g039960.3C;BraA09g062290.3C;BraA06g010780.3C;BraA06g006510.3C;BraA04g014520.3C;BraA03g050110.3C;BraA06g035010.3C;BraA03g028120.3C;BraA08g005690.3C;BraA07g013500.3C;BraA09g059260.3C;BraA10g007460.3C	0.546369
GO:0000421	autophagosome membrane	cellular_component	BraA08g015820.3C;BraA09g025640.3C;BraA03g023610.3C;BraA05g039000.3C;BraA03g046990.3C;BraA01g003650.3C;BraA05g031480.3C;BraA03g049890.3C;BraA08g022700.3C;BraA03g032690.3C;BraA01g012690.3C;BraA02g027610.3C	0.546369
GO:0003713	transcription coactivator activity	molecular_function	BraA10g020480.3C;BraA02g040430.3C;BraA03g058560.3C;BraA07g040760.3C;BraA09g001220.3C;BraA03g058540.3C;BraA05g032080.3C;BraA01g004220.3C;BraA10g000730.3C;BraA04g007480.3C;BraA06g000640.3C;BraA09g004620.3C;BraA05g016280.3C;BraA08g014080.3C;BraA06g034430.3C;BraA03g029260.3C;BraA03g058550.3C;BraA03g036740.3C;BraA08g001640.3C;BraA09g066010.3C;BraA06g001420.3C	0.550209
GO:0004379	glycylpeptide N-tetradecanoyltransferase activity	molecular_function	BraA04g032320.3C;BraA01g016820.3C;BraA10g014910.3C	0.561874
GO:0006537	glutamate biosynthetic process	biological_process	BraA04g029120.3C;BraA03g021860.3C;BraA03g021850.3C	0.561874
GO:0003934	GTP cyclohydrolase I activity	molecular_function	BraA01g041590.3C;BraA02g039750.3C;BraA05g038390.3C	0.561874
GO:0003992	N2-acetyl-L-ornithine:2-oxoglutarate 5-aminotransferase activity	molecular_function	BraA07g042900.3C;BraA02g025720.3C;BraA02g025760.3C	0.561874
GO:0004591	oxoglutarate dehydrogenase (succinyl-transferring) activity	molecular_function	BraA09g020910.3C;BraA06g029260.3C;BraA07g022040.3C	0.561874
GO:0000280	nuclear division	biological_process	BraA01g022660.3C;BraA03g045360.3C;BraA09g042220.3C	0.561874
GO:0000823	inositol-1,4,5-trisphosphate 6-kinase activity	molecular_function	BraA09g007090.3C;BraA06g037270.3C;BraA10g029850.3C	0.561874
GO:0004645	phosphorylase activity	molecular_function	BraA02g038730.3C;BraA06g036400.3C;BraA06g019940.3C	0.561874
GO:0004106	chorismate mutase activity	molecular_function	BraA06g036510.3C;BraA09g003780.3C;BraA02g038650.3C	0.561874
GO:0005847	mRNA cleavage and polyadenylation specificity factor complex	cellular_component	BraA03g005770.3C;BraA02g004930.3C;BraA02g000230.3C	0.561874
GO:0004829	threonine-tRNA ligase activity	molecular_function	BraA06g033570.3C;BraA09g057330.3C;BraA09g005380.3C	0.561874
GO:0004061	arylformamidase activity	molecular_function	BraA03g058660.3C;BraA01g003210.3C;BraA09g018880.3C	0.561874
GO:0003873	6-phosphofructo-2-kinase activity	molecular_function	BraA09g063550.3C;BraA08g033750.3C;BraA10g005710.3C	0.561874
GO:0004821	histidine-tRNA ligase activity	molecular_function	BraA03g031110.3C;BraA01g044030.3C;BraA08g023080.3C	0.561874
GO:0000035	acyl binding	molecular_function	BraA10g020210.3C;BraA02g008850.3C;BraA03g009590.3C	0.561874
GO:0008839	4-hydroxy-tetrahydrodipicolinate reductase	molecular_function	BraA04g031340.3C;BraA03g015130.3C;BraA03g023180.3C	0.561874
GO:0006464	cellular protein modification process	biological_process	BraA01g006720.3C;BraA08g017750.3C;BraA09g011190.3C	0.561874
GO:0003984	acetolactate synthase activity	molecular_function	BraA04g022900.3C;BraA03g016950.3C;BraA02g006420.3C	0.561874
GO:0051213	dioxygenase activity	molecular_function	BraA02g015920.3C;BraA01g020510.3C;BraA04g008740.3C	0.561874
GO:0000777	condensed chromosome kinetochore	cellular_component	BraA09g056080.3C;BraA05g011910.3C;BraA03g017540.3C	0.561874
GO:0003855	3-dehydroquinate dehydratase activity	molecular_function	BraA01g042090.3C;BraA03g032670.3C;BraA05g039070.3C	0.561874
GO:0006662	glycerol ether metabolic process	biological_process	BraA07g005330.3C;BraA10g029140.3C;BraA06g001630.3C	0.561874
GO:0005811	lipid particle	cellular_component	BraA07g029860.3C;BraA07g035410.3C;BraA02g019970.3C	0.561874
GO:0000002	mitochondrial genome maintenance	biological_process	BraA03g033640.3C;BraA07g008740.3C;BraA08g004980.3C	0.561874
GO:0004612	phosphoenolpyruvate carboxykinase (ATP) activity	molecular_function	BraA01g001150.3C;BraA06g029190.3C;BraA02g045310.3C	0.561874
GO:0000973	posttranscriptional tethering of RNA polymerase II gene DNA at nuclear periphery	biological_process	BraA02g025620.3C;BraA02g025630.3C;BraA07g025910.3C	0.561874
GO:0004723	calcium-dependent protein serine/threonine phosphatase activity	molecular_function	BraA06g031590.3C;BraA09g006200.3C;BraA02g042270.3C	0.561874
GO:0006754	ATP biosynthetic process	biological_process	BraA09g025620.3C;BraA02g027600.3C;BraA03g028250.3C	0.561874
GO:0004708	MAP kinase kinase activity	molecular_function	BraA09g066440.3C;BraA10g000060.3C;BraA07g014970.3C	0.561874
GO:0004820	glycine-tRNA ligase activity	molecular_function	BraA07g010800.3C;BraA07g027890.3C;BraA09g035190.3C	0.561874
GO:0001676	long-chain fatty acid metabolic process	biological_process	BraA03g032440.3C;BraA05g039380.3C;BraA06g033900.3C	0.561874
GO:0004149	dihydrolipoyllysine-residue succinyltransferase activity	molecular_function	BraA03g013590.3C;BraA02g013550.3C;BraA08g031360.3C	0.561874
GO:0002221	pattern recognition receptor signaling pathway	biological_process	BraA03g005610.3C;BraA10g025590.3C;BraA02g004680.3C	0.561874
GO:0000407	pre-autophagosomal structure	cellular_component	BraA01g021660.3C;BraA08g011000.3C;BraA09g064450.3C	0.561874
GO:0000340	RNA 7-methylguanosine cap binding	molecular_function	BraA05g015220.3C;BraA04g009570.3C;BraA08g009170.3C	0.561874
GO:0004165	dodecenoyl-CoA delta-isomerase activity	molecular_function	BraA05g038680.3C;BraA03g032970.3C;BraA01g041760.3C	0.561874
GO:0001047	core promoter binding	molecular_function	BraA10g031980.3C;BraA09g018190.3C;BraA08g001470.3C	0.561874
GO:0004353	glutamate dehydrogenase [NAD(P)+] activity	molecular_function	BraA05g042180.3C;BraA01g043400.3C;BraA10g021930.3C	0.561874
GO:0000963	mitochondrial RNA processing	biological_process	BraA01g007030.3C;BraA01g007130.3C;BraA03g056130.3C	0.561874
GO:0006355	regulation of transcription, DNA-templated	biological_process	BraA03g016960.3C;BraA05g011950.3C;BraA01g040860.3C	0.561874
GO:0009658	chloroplast organization	biological_process	BraA06g007820.3C;BraA09g025270.3C;BraA03g051790.3C	0.561874
GO:0004566	beta-glucuronidase activity	molecular_function	BraA08g009440.3C;BraA03g044250.3C;BraA10g030320.3C	0.561874
GO:0001682	tRNA 5'-leader removal	biological_process	BraA05g012700.3C;BraA01g012630.3C;BraA07g004460.3C	0.561874
GO:0005680	anaphase-promoting complex	cellular_component	BraA02g041080.3C;BraA05g039490.3C;BraA06g040820.3C	0.561874
GO:0004671	protein C-terminal S-isoprenylcysteine carboxyl O-methyltransferase activity	molecular_function	BraA03g003470.3C;BraA10g030650.3C;BraA03g063210.3C	0.561874
GO:0004067	asparaginase activity	molecular_function	BraA05g031030.3C;BraA10g030420.3C;BraA01g036100.3C	0.561874
GO:0004413	homoserine kinase activity	molecular_function	BraA09g010830.3C;BraA07g003690.3C;BraA06g030590.3C	0.561874
GO:0004794	L-threonine ammonia-lyase activity	molecular_function	BraA03g033650.3C;BraA01g040520.3C;BraA05g036600.3C	0.561874
GO:0003910	DNA ligase (ATP) activity	molecular_function	BraA10g018930.3C;BraA07g032330.3C;BraA05g037220.3C	0.561874
GO:0005483	soluble NSF attachment protein activity	molecular_function	BraA04g004190.3C;BraA09g046910.3C;BraA07g022260.3C	0.561874
GO:0003688	DNA replication origin binding	molecular_function	BraA03g025880.3C;BraA02g034380.3C;BraA06g040740.3C	0.561874
GO:0006955	immune response	biological_process	BraA07g011040.3C;BraA08g023780.3C;BraA07g011030.3C	0.561874
GO:0000427	plastid-encoded plastid RNA polymerase complex	cellular_component	BraA04g027570.3C;BraA08g013990.3C;BraA05g010460.3C	0.561874
GO:0004420	hydroxymethylglutaryl-CoA reductase (NADPH) activity	molecular_function	BraA02g023510.3C;BraA07g040140.3C;BraA07g003640.3C	0.561874
GO:0008430	selenium binding	molecular_function	BraA08g009660.3C;BraA08g009680.3C;BraA04g008060.3C	0.561874
GO:0000795	synaptonemal complex	cellular_component	BraA03g059490.3C;BraA07g026720.3C;BraA07g041320.3C	0.561874
GO:0000023	maltose metabolic process	biological_process	BraA10g022480.3C;BraA02g007090.3C;BraA05g001900.3C	0.561874
GO:0004582	dolichyl-phosphate beta-D-mannosyltransferase activity	molecular_function	BraA08g004760.3C;BraA07g015700.3C;BraA02g022260.3C	0.561874
GO:0008047	enzyme activator activity	molecular_function	BraA02g017880.3C;BraA07g033110.3C;BraA10g008570.3C	0.561874
GO:0005227	calcium activated cation channel activity	molecular_function	BraA03g028090.3C;BraA08g014880.3C;BraA01g012760.3C	0.561874
GO:0004322	ferroxidase activity	molecular_function	BraA09g001140.3C;BraA03g028650.3C;BraA05g035770.3C	0.561874
GO:0008474	palmitoyl-(protein) hydrolase activity	molecular_function	BraA09g022650.3C;BraA06g041190.3C;BraA02g033800.3C	0.561874
GO:0004451	isocitrate lyase activity	molecular_function	BraA05g025430.3C;BraA03g039990.3C;BraA06g016910.3C	0.561874
GO:0005102	receptor binding	molecular_function	BraA07g033820.3C;BraA02g018680.3C;BraA04g019630.3C	0.561874
GO:0006865	amino acid transport	biological_process	BraA05g035070.3C;BraA03g033900.3C;BraA03g035000.3C	0.561874
GO:0005354	galactose transmembrane transporter activity	molecular_function	BraA02g010760.3C;BraA10g017580.3C;BraA03g011160.3C	0.561874
GO:0004109	coproporphyrinogen oxidase activity	molecular_function	BraA09g007770.3C;BraA10g002030.3C;BraA09g065310.3C	0.561874
GO:0005310	dicarboxylic acid transmembrane transporter activity	molecular_function	BraA03g009220.3C;BraA02g008400.3C;BraA10g020640.3C	0.561874
GO:0000791	euchromatin	cellular_component	BraA03g008110.3C;BraA02g007170.3C;BraA10g022360.3C	0.561874
GO:0000212	meiotic spindle organization	biological_process	BraA10g015940.3C;BraA02g016940.3C;BraA02g011980.3C	0.561874
GO:0004514	nicotinate-nucleotide diphosphorylase (carboxylating) activity	molecular_function	BraA09g054250.3C;BraA02g034600.3C;BraA03g060540.3C	0.561874
GO:0000076	DNA replication checkpoint	biological_process	BraA05g039770.3C;BraA09g065540.3C;BraA08g035520.3C	0.561874
GO:0003881	CDP-diacylglycerol-inositol 3-phosphatidyltransferase activity	molecular_function	BraA07g033250.3C;BraA08g022970.3C;BraA07g030980.3C	0.561874
GO:0004438	phosphatidylinositol-3-phosphatase activity	molecular_function	BraA01g040190.3C;BraA10g031770.3C;BraA02g001410.3C	0.561874
GO:0003923	GPI-anchor transamidase activity	molecular_function	BraA10g021090.3C;BraA05g038500.3C;BraA09g062640.3C	0.561874
GO:0002764	immune response-regulating signaling pathway	biological_process	BraA10g020140.3C;BraA03g009640.3C;BraA02g031530.3C	0.561874
GO:0008493	tetracycline transporter activity	molecular_function	BraA07g004100.3C;BraA07g004120.3C;BraA03g043430.3C	0.561874
GO:0009295	nucleoid	cellular_component	BraA07g038570.3C;BraA04g008410.3C;BraA02g025880.3C	0.561874
GO:0008643	carbohydrate transport	biological_process	BraA03g042070.3C;BraA03g012580.3C;BraA10g013800.3C	0.561874
GO:0005223	intracellular cGMP activated cation channel activity	molecular_function	BraA04g017580.3C;BraA09g054020.3C;BraA02g011940.3C	0.561874
GO:0000993	RNA polymerase II core binding	molecular_function	BraA03g042170.3C;BraA04g026000.3C;BraA09g025460.3C	0.561874
GO:0003785	actin monomer binding	molecular_function	BraA05g010920.3C;BraA08g027070.3C;BraA10g014520.3C	0.561874
GO:0003846	2-acylglycerol O-acyltransferase activity	molecular_function	BraA05g017550.3C;BraA05g017560.3C;BraA06g001830.3C	0.561874
GO:0004663	Rab geranylgeranyltransferase activity	molecular_function	BraA03g051890.3C;BraA01g015270.3C;BraA10g026110.3C	0.561874
GO:0000249	C-22 sterol desaturase activity	molecular_function	BraA05g010620.3C;BraA04g024680.3C;BraA04g024690.3C	0.561874
GO:0006807	nitrogen compound metabolic process	biological_process	BraA04g019760.3C;BraA01g029270.3C;BraA09g020730.3C	0.561874
GO:0016491	oxidoreductase activity	molecular_function	BraA09g014190.3C;BraA05g014850.3C;BraA07g031940.3C;BraA03g000760.3C;BraA03g024760.3C;BraA05g015970.3C;BraA08g033610.3C;BraA09g013940.3C;BraA03g051640.3C;BraA04g021010.3C;BraA02g037110.3C;BraA04g020970.3C;BraA09g063320.3C;BraA05g035900.3C;BraA01g014780.3C;BraA10g033110.3C	0.569046
GO:0000290	deadenylation-dependent decapping of nuclear-transcribed mRNA	biological_process	BraA01g037520.3C;BraA04g012900.3C;BraA06g005570.3C;BraA04g012920.3C;BraA10g025270.3C;BraA07g026370.3C;BraA04g012880.3C;BraA04g012890.3C;BraA06g012570.3C;BraA05g032990.3C;BraA04g013020.3C;BraA07g042120.3C;BraA04g012910.3C;BraA08g033220.3C;BraA03g036240.3C;BraA09g062810.3C	0.569046
GO:0003924	GTPase activity	molecular_function	BraA01g012530.3C;BraA06g035870.3C;BraA10g017050.3C;BraA01g027170.3C;BraA05g012980.3C;BraA01g019440.3C;BraA03g044850.3C;BraA05g024240.3C;BraA09g045670.3C;BraA10g017660.3C;BraA04g031740.3C;BraA09g042520.3C;BraA01g042740.3C;BraA08g028870.3C;BraA07g039280.3C;BraA05g034700.3C;BraA01g007230.3C;BraA09g024440.3C;BraA05g005460.3C;BraA01g003360.3C;BraA05g010320.3C;BraA08g035180.3C;BraA04g015980.3C;BraA10g0…	0.571079
GO:0001046	core promoter sequence-specific DNA binding	molecular_function	BraA08g016360.3C;BraA05g000670.3C;BraA04g030510.3C;BraA01g004310.3C;BraA08g007990.3C;BraA08g022420.3C;BraA09g033880.3C;BraA10g022270.3C;BraA10g004590.3C;BraA02g011900.3C;BraA05g022000.3C;BraA03g008160.3C;BraA09g036890.3C;BraA01g029400.3C;BraA02g017080.3C;BraA04g029740.3C;BraA08g028240.3C;BraA02g027170.3C;BraA07g011960.3C;BraA04g017810.3C;BraA06g002790.3C;BraA09g030460.3C;BraA06g044350.3C;BraA03g0…	0.571688
GO:0003999	adenine phosphoribosyltransferase activity	molecular_function	BraA07g018050.3C;BraA09g037040.3C;BraA07g025620.3C;BraA10g026970.3C;BraA02g003810.3C;BraA03g050250.3C;BraA07g043200.3C	0.579319
GO:0000050	urea cycle	biological_process	BraA02g031240.3C;BraA07g034470.3C;BraA07g027800.3C;BraA01g033100.3C;BraA09g035170.3C;BraA02g019260.3C;BraA03g026730.3C	0.579319
GO:0000981	RNA polymerase II transcription factor activity, sequence-specific DNA binding	molecular_function	BraA07g021670.3C;BraA03g000730.3C;BraA09g045300.3C;BraA03g022050.3C;BraA07g042580.3C;BraA06g012080.3C;BraA10g033160.3C	0.579319
GO:0005975	carbohydrate metabolic process	biological_process	BraA07g027570.3C;BraA06g027840.3C;BraA04g004360.3C;BraA03g015090.3C;BraA03g064850.3C;BraA07g022160.3C;BraA01g022810.3C	0.579319
GO:0046872	metal ion binding	molecular_function	BraA09g006430.3C;BraA09g029230.3C;BraA09g040090.3C;BraA06g031160.3C;BraA03g014840.3C;BraA03g028370.3C;BraA02g015200.3C	0.579319
GO:0004742	dihydrolipoyllysine-residue acetyltransferase activity	molecular_function	BraA06g038650.3C;BraA09g024590.3C;BraA03g004660.3C;BraA09g043410.3C;BraA09g030850.3C;BraA06g000770.3C;BraA05g033100.3C	0.579319
GO:0001653	peptide receptor activity	molecular_function	BraA02g014340.3C;BraA07g036680.3C;BraA10g012130.3C;BraA09g059320.3C;BraA02g020930.3C;BraA07g036690.3C;BraA02g035420.3C	0.579319
GO:0005765	lysosomal membrane	cellular_component	BraA09g023740.3C;BraA05g003360.3C;BraA04g030580.3C;BraA07g005680.3C;BraA01g004650.3C;BraA04g012740.3C;BraA02g035930.3C	0.579319
GO:0001055	RNA polymerase II activity	molecular_function	BraA08g014260.3C;BraA01g002750.3C;BraA03g045860.3C;BraA04g007220.3C;BraA01g012410.3C;BraA08g014710.3C;BraA08g020570.3C	0.579319
GO:0006621	protein retention in ER lumen	biological_process	BraA07g010140.3C;BraA06g015580.3C;BraA07g027640.3C;BraA08g027990.3C;BraA07g016070.3C;BraA08g022820.3C;BraA07g039250.3C	0.579319
GO:0003854	3-beta-hydroxy-delta5-steroid dehydrogenase activity	molecular_function	BraA10g006630.3C;BraA08g003490.3C;BraA03g017820.3C;BraA09g052780.3C;BraA05g003570.3C;BraA08g003480.3C;BraA07g040090.3C	0.579319
GO:0004142	diacylglycerol cholinephosphotransferase activity	molecular_function	BraA02g013370.3C;BraA03g037170.3C;BraA06g009780.3C;BraA06g038900.3C;BraA09g060060.3C;BraA05g031230.3C;BraA02g036500.3C	0.579319
GO:0003712	transcription cofactor activity	molecular_function	BraA06g011820.3C;BraA03g001350.3C;BraA07g042040.3C;BraA06g029570.3C;BraA03g022440.3C;BraA03g060860.3C;BraA01g001300.3C;BraA06g026770.3C;BraA06g011850.3C;BraA09g058560.3C;BraA09g058150.3C;BraA01g038470.3C;BraA06g011830.3C;BraA07g009000.3C;BraA03g035660.3C;BraA08g034250.3C;BraA08g029590.3C;BraA06g011860.3C;BraA06g018600.3C;BraA05g003060.3C;BraA06g011840.3C;BraA08g029600.3C;BraA06g011790.3C;BraA02g0…	0.585811
GO:0000724	double-strand break repair via homologous recombination	biological_process	BraA09g026210.3C;BraA08g010030.3C;BraA05g028150.3C;BraA02g002440.3C;BraA03g059590.3C;BraA01g004300.3C;BraA05g039970.3C;BraA05g041350.3C;BraA02g017130.3C;BraA05g036890.3C;BraA09g065110.3C;BraA08g014550.3C;BraA06g010900.3C;BraA10g019550.3C;BraA03g044430.3C;BraA05g039590.3C;BraA05g015370.3C;BraA03g010420.3C;BraA09g059170.3C;BraA01g025720.3C;BraA08g020670.3C;BraA06g035950.3C;BraA05g031980.3C;BraA09g0…	0.585811
GO:0000036	ACP phosphopantetheine attachment site binding involved in fatty acid biosynthetic process	molecular_function	BraA03g052220.3C;BraA09g004870.3C;BraA05g004500.3C;BraA01g042810.3C;BraA08g033120.3C;BraA07g008000.3C;BraA02g034160.3C;BraA01g022460.3C;BraA01g015780.3C;BraA04g008920.3C;BraA03g041460.3C;BraA06g036630.3C;BraA09g062730.3C;BraA02g016600.3C;BraA03g031960.3C;BraA07g031580.3C;BraA06g005660.3C;BraA09g062740.3C;BraA09g019020.3C;BraA05g040150.3C	0.5874
GO:0004605	phosphatidate cytidylyltransferase activity	molecular_function	BraA03g023590.3C;BraA10g016440.3C;BraA04g001640.3C;BraA10g031820.3C;BraA03g001610.3C;BraA01g017520.3C;BraA03g063550.3C;BraA09g015880.3C;BraA03g063560.3C;BraA01g013030.3C;BraA03g011750.3C	0.596717
GO:0003954	NADH dehydrogenase activity	molecular_function	BraA08g033680.3C;BraA03g003610.3C;BraA08g004520.3C;BraA03g015920.3C;BraA02g002780.3C;BraA04g010370.3C;BraA02g023290.3C;BraA10g005840.3C;BraA03g007700.3C;BraA10g030840.3C;BraA03g054280.3C	0.596717
GO:0003950	NAD+ ADP-ribosyltransferase activity	molecular_function	BraA07g014110.3C;BraA09g051980.3C;BraA02g004270.3C;BraA09g015790.3C;BraA06g034610.3C;BraA02g004260.3C;BraA07g035180.3C;BraA02g043750.3C;BraA06g026140.3C;BraA02g028320.3C;BraA05g009730.3C	0.596717
GO:0000150	recombinase activity	molecular_function	BraA03g012430.3C;BraA08g033440.3C;BraA02g024990.3C;BraA05g005040.3C;BraA03g009850.3C;BraA01g031330.3C;BraA10g019820.3C;BraA04g020420.3C;BraA07g001330.3C;BraA09g056590.3C;BraA07g026380.3C	0.596717
GO:0004842	ubiquitin-protein transferase activity	molecular_function	BraA05g014760.3C;BraA05g006140.3C;BraA09g059460.3C;BraA08g003960.3C;BraA10g028210.3C;BraA04g016020.3C;BraA04g001220.3C;BraA01g042100.3C;BraA04g017080.3C;BraA09g036820.3C;BraA03g016320.3C;BraA09g005810.3C;BraA09g010760.3C;BraA08g030100.3C;BraA08g023920.3C;BraA09g005270.3C;BraA06g004030.3C;BraA04g018750.3C;BraA09g017790.3C;BraA03g039780.3C;BraA05g013810.3C;BraA06g028100.3C;BraA02g034400.3C;BraA02g0…	0.603907
GO:0005509	calcium ion binding	molecular_function	BraA09g064200.3C;BraA08g034600.3C;BraA09g004550.3C;BraA10g030900.3C;BraA09g049660.3C;BraA03g033290.3C;BraA05g040620.3C;BraA10g003750.3C;BraA04g014770.3C;BraA09g004690.3C;BraA03g053190.3C;BraA04g032180.3C;BraA01g043670.3C;BraA01g006710.3C;BraA08g035100.3C;BraA01g026740.3C;BraA06g010290.3C;BraA06g014160.3C;BraA10g027640.3C;BraA02g045720.3C;BraA07g040260.3C;BraA06g044720.3C;BraA03g017710.3C;BraA08g0…	0.612322
GO:0000149	SNARE binding	molecular_function	BraA07g002460.3C;BraA07g011570.3C;BraA02g019200.3C;BraA01g009340.3C;BraA07g021660.3C;BraA10g026980.3C;BraA02g034500.3C;BraA05g042100.3C;BraA05g036870.3C;BraA02g002600.3C;BraA04g025000.3C;BraA05g039620.3C;BraA09g018040.3C;BraA02g011750.3C;BraA06g005710.3C;BraA02g025410.3C;BraA01g030700.3C;BraA01g035220.3C;BraA01g040580.3C;BraA06g007930.3C;BraA03g037930.3C;BraA08g033100.3C;BraA04g023480.3C;BraA06g0…	0.623303
GO:0002237	response to molecule of bacterial origin	biological_process	BraA03g031200.3C;BraA02g025510.3C;BraA08g013050.3C;BraA10g021610.3C;BraA03g045350.3C;BraA08g013240.3C;BraA01g006130.3C;BraA07g042700.3C;BraA01g022670.3C;BraA08g017290.3C;BraA02g025910.3C;BraA02g007700.3C;BraA03g056960.3C;BraA07g026010.3C;BraA05g040160.3C;BraA03g047050.3C;BraA07g035970.3C;BraA07g043000.3C;BraA03g041440.3C	0.624958
GO:0003779	actin binding	molecular_function	BraA03g055480.3C;BraA04g007980.3C;BraA05g024420.3C;BraA09g001530.3C;BraA03g022060.3C;BraA03g003150.3C;BraA03g041590.3C;BraA05g014370.3C;BraA10g016150.3C;BraA10g015210.3C;BraA05g002430.3C;BraA08g009800.3C;BraA01g031450.3C;BraA06g004590.3C;BraA06g029580.3C;BraA02g010580.3C;BraA02g038390.3C;BraA07g010310.3C;BraA03g033310.3C;BraA10g017720.3C;BraA04g014500.3C;BraA08g020020.3C;BraA09g056440.3C;BraA05g0…	0.635248
GO:0004190	aspartic-type endopeptidase activity	molecular_function	BraA02g000420.3C;BraA09g018430.3C;BraA03g028150.3C;BraA03g063990.3C;BraA09g018450.3C;BraA08g009510.3C;BraA05g034380.3C;BraA10g000370.3C;BraA09g015100.3C;BraA10g021140.3C;BraA10g021130.3C;BraA01g040110.3C;BraA03g035450.3C;BraA05g034390.3C;BraA03g035820.3C;BraA10g027200.3C;BraA10g021120.3C;BraA09g066230.3C;BraA08g009530.3C;BraA01g040120.3C;BraA02g007970.3C;BraA09g048150.3C;BraA01g038690.3C	0.636813
GO:0000155	phosphorelay sensor kinase activity	molecular_function	BraA07g032080.3C;BraA01g030980.3C;BraA05g000390.3C;BraA02g003560.3C;BraA06g040070.3C;BraA10g002840.3C;BraA06g023540.3C;BraA03g004430.3C;BraA06g039700.3C;BraA03g012050.3C;BraA07g012270.3C;BraA03g004420.3C;BraA06g006450.3C;BraA03g041900.3C;BraA01g009650.3C;BraA05g030340.3C;BraA09g062320.3C;BraA01g043050.3C;BraA04g008010.3C;BraA08g018740.3C;BraA10g016140.3C;BraA07g003100.3C;BraA05g000500.3C	0.636813
GO:0003885	D-arabinono-1,4-lactone oxidase activity	molecular_function	BraA10g014340.3C;BraA02g003980.3C;BraA05g001100.3C;BraA06g019070.3C;BraA02g012830.3C;BraA05g001120.3C	0.646868
GO:0001678	cellular glucose homeostasis	biological_process	BraA05g027230.3C;BraA05g019040.3C;BraA01g001180.3C;BraA06g003260.3C;BraA08g002960.3C;BraA10g006310.3C	0.646868
GO:0004301	epoxide hydrolase activity	molecular_function	BraA09g001820.3C;BraA03g045370.3C;BraA05g039670.3C;BraA09g042250.3C;BraA03g046630.3C;BraA01g022650.3C	0.646868
GO:0004559	alpha-mannosidase activity	molecular_function	BraA09g037000.3C;BraA08g023620.3C;BraA03g006030.3C;BraA06g038110.3C;BraA09g035020.3C;BraA02g030710.3C	0.646868
GO:0004326	tetrahydrofolylpolyglutamate synthase activity	molecular_function	BraA02g001870.3C;BraA01g040490.3C;BraA03g041880.3C;BraA10g028770.3C;BraA03g002270.3C;BraA02g025830.3C	0.646868
GO:0030599	pectinesterase activity	molecular_function	BraA03g029150.3C;BraA09g000740.3C;BraA08g014950.3C;BraA05g039650.3C;BraA08g000360.3C;BraA02g026910.3C	0.646868
GO:0004047	aminomethyltransferase activity	molecular_function	BraA03g027800.3C;BraA09g026460.3C;BraA08g031370.3C;BraA01g028690.3C;BraA03g027810.3C;BraA06g008370.3C	0.646868
GO:0004853	uroporphyrinogen decarboxylase activity	molecular_function	BraA04g028660.3C;BraA08g015380.3C;BraA05g001750.3C;BraA07g018900.3C;BraA07g018890.3C;BraA09g029880.3C	0.646868
GO:0009555	pollen development	biological_process	BraA01g017220.3C;BraA06g006140.3C;BraA03g001840.3C;BraA05g001210.3C;BraA10g013920.3C;BraA02g013030.3C	0.646868
GO:0000272	polysaccharide catabolic process	biological_process	BraA03g013290.3C;BraA03g018400.3C;BraA05g005510.3C;BraA03g022860.3C;BraA06g007340.3C;BraA10g021480.3C;BraA04g030190.3C;BraA06g031470.3C;BraA02g013180.3C;BraA05g003700.3C;BraA05g009820.3C;BraA06g006230.3C;BraA02g031750.3C;BraA09g006270.3C;BraA03g022890.3C;BraA04g030200.3C;BraA03g022850.3C;BraA05g012610.3C;BraA03g022840.3C;BraA09g018740.3C;BraA03g016200.3C;BraA05g003710.3C;BraA10g009650.3C;BraA03g0…	0.647609
GO:0004712	protein serine/threonine/tyrosine kinase activity	molecular_function	BraA07g017240.3C;BraA01g041910.3C;BraA07g024070.3C;BraA03g032770.3C;BraA09g013760.3C;BraA09g053750.3C;BraA03g026100.3C;BraA05g015530.3C;BraA04g013180.3C;BraA04g017890.3C;BraA08g013210.3C;BraA09g049670.3C;BraA06g019990.3C;BraA09g012520.3C;BraA09g066130.3C;BraA05g038810.3C;BraA05g040580.3C;BraA09g053760.3C;BraA03g032780.3C;BraA03g011830.3C;BraA09g015900.3C;BraA01g041920.3C;BraA04g002570.3C;BraA01g0…	0.647609
GO:0000159	protein phosphatase type 2A complex	cellular_component	BraA01g021340.3C;BraA09g056710.3C;BraA06g013420.3C;BraA08g002480.3C;BraA09g057550.3C;BraA07g021930.3C;BraA03g046210.3C;BraA09g024680.3C;BraA02g000940.3C;BraA05g018150.3C;BraA01g033260.3C;BraA07g023440.3C;BraA06g038530.3C;BraA02g036740.3C;BraA03g039150.3C;BraA05g036730.3C;BraA07g003610.3C;BraA09g048780.3C;BraA06g004240.3C;BraA06g038520.3C;BraA03g033710.3C;BraA05g025500.3C;BraA06g002490.3C;BraA06g0…	0.647609
GO:0005242	inward rectifier potassium channel activity	molecular_function	BraA04g018600.3C;BraA03g031180.3C;BraA03g057410.3C;BraA09g021740.3C;BraA09g052990.3C;BraA01g005580.3C;BraA05g041490.3C;BraA01g009770.3C;BraA08g012880.3C;BraA06g041990.3C	0.648344
GO:0000266	mitochondrial fission	biological_process	BraA02g009720.3C;BraA09g043330.3C;BraA09g047780.3C;BraA04g018950.3C;BraA10g019000.3C;BraA08g030040.3C;BraA08g016490.3C;BraA01g004470.3C;BraA09g059090.3C;BraA10g025970.3C	0.648344
GO:0000741	karyogamy	biological_process	BraA09g033550.3C;BraA09g037310.3C;BraA01g006830.3C;BraA02g038270.3C;BraA09g006580.3C;BraA08g017860.3C;BraA07g039580.3C;BraA07g000240.3C;BraA06g036870.3C;BraA06g015110.3C	0.648344
GO:0008150	biological_process	biological_process	BraA10g021190.3C;BraA06g027490.3C;BraA08g022870.3C;BraA04g026460.3C;BraA10g019790.3C;BraA06g035080.3C;BraA02g008740.3C;BraA02g009080.3C;BraA09g008700.3C;BraA01g029680.3C;BraA06g010670.3C;BraA01g009380.3C;BraA04g004560.3C;BraA06g005230.3C;BraA10g021250.3C;BraA03g047350.3C;BraA05g032260.3C;BraA03g047360.3C;BraA09g064320.3C;BraA02g008730.3C;BraA08g033340.3C;BraA04g018970.3C;BraA03g015560.3C;BraA08g0…	0.66812
GO:0004721	phosphoprotein phosphatase activity	molecular_function	BraA08g021020.3C;BraA01g039670.3C;BraA07g017230.3C;BraA08g000250.3C;BraA01g044220.3C;BraA08g021030.3C;BraA03g031140.3C;BraA09g026020.3C;BraA10g003590.3C;BraA01g019980.3C;BraA09g002540.3C;BraA07g037820.3C;BraA08g028680.3C;BraA01g019410.3C;BraA01g044260.3C;BraA04g019560.3C;BraA08g009060.3C;BraA01g026620.3C;BraA03g022320.3C;BraA06g000270.3C;BraA06g031130.3C;BraA08g003070.3C;BraA10g005640.3C;BraA05g0…	0.669045
GO:0000326	protein storage vacuole	cellular_component	BraA07g028850.3C;BraA06g043320.3C;BraA04g026140.3C;BraA06g003970.3C;BraA08g027170.3C;BraA05g030960.3C;BraA04g001660.3C;BraA03g037440.3C;BraA07g015060.3C;BraA09g062480.3C;BraA09g065170.3C;BraA07g000570.3C;BraA06g032040.3C;BraA06g006050.3C;BraA08g003870.3C;BraA08g018960.3C;BraA06g017290.3C;BraA10g002460.3C;BraA07g024350.3C;BraA02g031070.3C;BraA01g036030.3C;BraA01g008970.3C	0.670448
GO:0000398	mRNA splicing, via spliceosome	biological_process	BraA03g002380.3C;BraA03g056780.3C;BraA09g050910.3C;BraA07g040630.3C;BraA06g024570.3C;BraA05g023160.3C;BraA05g027620.3C;BraA02g039890.3C;BraA05g036920.3C;BraA05g033970.3C;BraA01g027020.3C;BraA09g049650.3C;BraA08g032430.3C;BraA02g023740.3C;BraA08g018170.3C;BraA04g027400.3C;BraA10g030870.3C;BraA03g056940.3C;BraA01g039720.3C;BraA09g062210.3C;BraA10g001900.3C;BraA02g016800.3C;BraA01g012350.3C;BraA09g0…	0.673357
GO:0001944	vasculature development	biological_process	BraA09g036320.3C;BraA07g028030.3C;BraA08g012440.3C;BraA06g041230.3C;BraA09g022610.3C;BraA02g033740.3C;BraA03g005210.3C;BraA05g020800.3C;BraA06g029290.3C;BraA06g006420.3C;BraA09g027250.3C;BraA07g008230.3C;BraA09g036330.3C;BraA02g045340.3C;BraA07g011650.3C;BraA03g058830.3C;BraA08g033090.3C;BraA07g015580.3C;BraA09g062350.3C;BraA07g038640.3C;BraA09g008800.3C;BraA01g009130.3C;BraA03g044630.3C;BraA01g0…	0.678213
GO:0000049	tRNA binding	molecular_function	BraA07g039650.3C;BraA09g049320.3C;BraA10g013540.3C;BraA10g023760.3C;BraA08g006300.3C;BraA03g021600.3C;BraA09g006050.3C;BraA08g003120.3C;BraA01g001960.3C;BraA04g008310.3C;BraA05g028050.3C;BraA09g048670.3C;BraA05g019410.3C;BraA05g019430.3C;BraA05g001830.3C;BraA07g023280.3C;BraA06g003410.3C;BraA01g044450.3C;BraA03g007100.3C;BraA05g022570.3C;BraA04g028820.3C;BraA03g009260.3C;BraA09g049860.3C;BraA05g0…	0.678213
GO:0006066	alcohol metabolic process	biological_process	BraA07g009680.3C;BraA03g040800.3C	0.680918
GO:0000390	spliceosomal complex disassembly	biological_process	BraA06g012880.3C;BraA09g057980.3C	0.680918
GO:0004856	xylulokinase activity	molecular_function	BraA06g019880.3C;BraA09g055580.3C	0.680918
GO:0004888	transmembrane signaling receptor activity	molecular_function	BraA06g012120.3C;BraA02g031600.3C	0.680918
GO:0004844	uracil DNA N-glycosylase activity	molecular_function	BraA05g028710.3C;BraA01g034290.3C	0.680918
GO:0000422	mitophagy	biological_process	BraA02g032310.3C;BraA08g022460.3C	0.680918
GO:0004588	orotate phosphoribosyltransferase activity	molecular_function	BraA04g005410.3C;BraA07g021760.3C	0.680918
GO:0000779	condensed chromosome, centromeric region	cellular_component	BraA04g003500.3C;BraA09g047730.3C	0.680918
GO:0000009	alpha-1,6-mannosyltransferase activity	molecular_function	BraA09g066470.3C;BraA10g000030.3C	0.680918
GO:0000289	nuclear-transcribed mRNA poly(A) tail shortening	biological_process	BraA08g009990.3C;BraA09g033510.3C	0.680918
GO:0006637	acyl-CoA metabolic process	biological_process	BraA03g030060.3C;BraA02g026460.3C	0.680918
GO:0004808	tRNA (5-methylaminomethyl-2-thiouridylate)-methyltransferase activity	molecular_function	BraA05g018420.3C;BraA08g002750.3C	0.680918
GO:0010052	guard cell differentiation	biological_process	BraA03g036180.3C;BraA07g036290.3C	0.680918
GO:0002143	tRNA wobble position uridine thiolation	biological_process	BraA02g013500.3C;BraA10g013140.3C	0.680918
GO:0004329	formate-tetrahydrofolate ligase activity	molecular_function	BraA05g019020.3C;BraA06g003250.3C	0.680918
GO:0000026	alpha-1,2-mannosyltransferase activity	molecular_function	BraA08g029500.3C;BraA06g012760.3C	0.680918
GO:0008422	beta-glucosidase activity	molecular_function	BraA05g038920.3C;BraA01g041990.3C	0.680918
GO:0033365	protein localization to organelle	biological_process	BraA05g002730.3C;BraA04g029690.3C	0.680918
GO:0000247	C-8 sterol isomerase activity	molecular_function	BraA07g016030.3C;BraA06g015610.3C	0.680918
GO:0032543	mitochondrial translation	biological_process	BraA09g028590.3C;BraA03g000860.3C	0.680918
GO:0010269	response to selenium ion	biological_process	BraA04g000120.3C;BraA09g052490.3C	0.680918
GO:0004673	protein histidine kinase activity	molecular_function	BraA07g031110.3C;BraA05g015210.3C	0.680918
GO:0006069	ethanol oxidation	biological_process	BraA06g043480.3C;BraA09g020130.3C	0.680918
GO:0004055	argininosuccinate synthase activity	molecular_function	BraA03g052090.3C;BraA01g015580.3C	0.680918
GO:0000495	box H/ACA snoRNA 3'-end processing	biological_process	BraA07g022750.3C;BraA02g028460.3C	0.680918
GO:0005046	KDEL sequence binding	molecular_function	BraA08g023930.3C;BraA09g035550.3C	0.680918
GO:0003973	(S)-2-hydroxy-acid oxidase activity	molecular_function	BraA09g047450.3C;BraA09g047420.3C	0.680918
GO:0000796	condensin complex	cellular_component	BraA06g025930.3C;BraA06g019550.3C	0.680918
GO:0006400	tRNA modification	biological_process	BraA03g009380.3C;BraA02g008650.3C	0.680918
GO:0004163	diphosphomevalonate decarboxylase activity	molecular_function	BraA04g005540.3C;BraA09g045230.3C	0.680918
GO:0010150	leaf senescence	biological_process	BraA08g012010.3C;BraA01g019870.3C	0.680918
GO:0002103	endonucleolytic cleavage of tetracistronic rRNA transcript (SSU-rRNA, LSU-rRNA, 4.5S-rRNA, 5S-rRNA)	biological_process	BraA04g024010.3C;BraA05g011400.3C	0.680918
GO:0009306	protein secretion	biological_process	BraA03g029520.3C;BraA08g027250.3C	0.680918
GO:0000278	mitotic cell cycle	biological_process	BraA08g016100.3C;BraA06g004650.3C	0.680918
GO:0015015	heparan sulfate proteoglycan biosynthetic process, enzymatic modification	biological_process	BraA08g033320.3C;BraA06g005250.3C	0.680918
GO:0008202	steroid metabolic process	biological_process	BraA02g016150.3C;BraA03g026320.3C	0.680918
GO:0005658	alpha DNA polymerase:primase complex	cellular_component	BraA07g016840.3C;BraA02g035980.3C	0.680918
GO:0004360	glutamine-fructose-6-phosphate transaminase (isomerizing) activity	molecular_function	BraA07g008960.3C;BraA03g040930.3C	0.680918
GO:0000309	nicotinamide-nucleotide adenylyltransferase activity	molecular_function	BraA10g013720.3C;BraA03g013240.3C	0.680918
GO:0008654	phospholipid biosynthetic process	biological_process	BraA10g000410.3C;BraA09g066200.3C	0.680918
GO:0000792	heterochromatin	cellular_component	BraA02g033320.3C;BraA09g022420.3C	0.680918
GO:0032259	methylation	biological_process	BraA09g044090.3C;BraA04g006320.3C	0.680918
GO:0004411	homogentisate 1,2-dioxygenase activity	molecular_function	BraA10g012200.3C;BraA02g014190.3C	0.680918
GO:0003882	CDP-diacylglycerol-serine O-phosphatidyltransferase activity	molecular_function	BraA06g011180.3C;BraA09g058870.3C	0.680918
GO:0004328	formamidase activity	molecular_function	BraA01g001330.3C;BraA01g001320.3C	0.680918
GO:0016757	transferase activity, transferring glycosyl groups	molecular_function	BraA09g008710.3C;BraA04g020090.3C	0.680918
GO:0000710	meiotic mismatch repair	biological_process	BraA05g026740.3C;BraA08g012380.3C	0.680918
GO:0003991	acetylglutamate kinase activity	molecular_function	BraA09g048140.3C;BraA04g003210.3C	0.680918
GO:0005771	multivesicular body	cellular_component	BraA02g014530.3C;BraA10g011860.3C	0.680918
GO:0005372	water transmembrane transporter activity	molecular_function	BraA07g042780.3C;BraA02g025580.3C	0.680918
GO:0001881	receptor recycling	biological_process	BraA06g019180.3C;BraA06g024190.3C	0.680918
GO:0000740	nuclear membrane fusion	biological_process	BraA06g035850.3C;BraA02g039340.3C	0.680918
GO:0004377	GDP-Man:Man3GlcNAc2-PP-Dol alpha-1,2-mannosyltransferase activity	molecular_function	BraA04g028270.3C;BraA05g005900.3C	0.680918
GO:0004300	enoyl-CoA hydratase activity	molecular_function	BraA08g012080.3C;BraA09g019690.3C	0.680918
GO:0002540	leukotriene production involved in inflammatory response	biological_process	BraA06g022650.3C;BraA02g016830.3C	0.680918
GO:0004358	glutamate N-acetyltransferase activity	molecular_function	BraA04g026540.3C;BraA05g008050.3C	0.680918
GO:0003866	3-phosphoshikimate 1-carboxyvinyltransferase activity	molecular_function	BraA04g030730.3C;BraA03g023680.3C	0.680918
GO:0004168	dolichol kinase activity	molecular_function	BraA01g025710.3C;BraA05g012670.3C	0.680918
GO:0000281	mitotic cytokinesis	biological_process	BraA05g030130.3C;BraA05g028260.3C	0.680918
GO:0005542	folic acid binding	molecular_function	BraA09g056020.3C;BraA07g000040.3C	0.680918
GO:0006396	RNA processing	biological_process	BraA04g021240.3C;BraA05g014510.3C	0.680918
GO:0010214	seed coat development	biological_process	BraA05g000300.3C;BraA04g032550.3C	0.680918
GO:0004318	enoyl-[acyl-carrier-protein] reductase (NADH) activity	molecular_function	BraA03g042190.3C;BraA03g042200.3C	0.680918
GO:0030145	manganese ion binding	molecular_function	BraA09g007410.3C;BraA06g026430.3C	0.680918
GO:0000906	6,7-dimethyl-8-ribityllumazine synthase activity	molecular_function	BraA04g015110.3C;BraA04g031330.3C	0.680918
GO:0004740	pyruvate dehydrogenase (acetyl-transferring) kinase activity	molecular_function	BraA05g038950.3C;BraA03g032730.3C	0.680918
GO:0030173	integral component of Golgi membrane	cellular_component	BraA03g050640.3C;BraA01g013640.3C	0.680918
GO:0003963	RNA-3'-phosphate cyclase activity	molecular_function	BraA10g006360.3C;BraA08g004930.3C	0.680918
GO:0003938	IMP dehydrogenase activity	molecular_function	BraA06g012280.3C;BraA07g042420.3C	0.680918
GO:0004019	adenylosuccinate synthase activity	molecular_function	BraA04g003190.3C;BraA07g022940.3C	0.680918
GO:0004587	ornithine-oxo-acid transaminase activity	molecular_function	BraA09g021720.3C;BraA06g042040.3C	0.680918
GO:0005793	endoplasmic reticulum-Golgi intermediate compartment	cellular_component	BraA06g016550.3C;BraA08g027510.3C	0.680918
GO:0006024	glycosaminoglycan biosynthetic process	biological_process	BraA02g001390.3C;BraA10g031810.3C	0.680918
GO:0003987	acetate-CoA ligase activity	molecular_function	BraA04g015830.3C;BraA05g030400.3C	0.680918
GO:0004729	oxygen-dependent protoporphyrinogen oxidase activity	molecular_function	BraA10g024790.3C;BraA10g001110.3C	0.680918
GO:0004076	biotin synthase activity	molecular_function	BraA03g022720.3C;BraA05g003530.3C	0.680918
GO:0004371	glycerone kinase activity	molecular_function	BraA05g029810.3C;BraA08g004400.3C	0.680918
GO:0004463	leukotriene-A4 hydrolase activity	molecular_function	BraA02g004960.3C;BraA10g025320.3C	0.680918
GO:0006351	transcription, DNA-templated	biological_process	BraA08g031400.3C;BraA05g000050.3C	0.680918
GO:0004324	ferredoxin-NADP+ reductase activity	molecular_function	BraA09g024860.3C;BraA09g034540.3C	0.680918
GO:0004368	glycerol-3-phosphate dehydrogenase activity	molecular_function	BraA05g036400.3C;BraA01g040360.3C	0.680918
GO:0004180	carboxypeptidase activity	molecular_function	BraA09g045530.3C;BraA04g005210.3C	0.680918
GO:0004749	ribose phosphate diphosphokinase activity	molecular_function	BraA05g003250.3C;BraA03g022480.3C	0.680918
GO:0005254	chloride channel activity	molecular_function	BraA07g037240.3C;BraA07g028950.3C	0.680918
GO:0031969	chloroplast membrane	cellular_component	BraA08g023330.3C;BraA09g034700.3C	0.680918
GO:0000380	alternative mRNA splicing, via spliceosome	biological_process	BraA10g016050.3C;BraA02g011890.3C	0.680918
GO:0004733	pyridoxamine-phosphate oxidase activity	molecular_function	BraA03g026080.3C;BraA05g042150.3C	0.680918
GO:0000470	maturation of LSU-rRNA	biological_process	BraA04g000050.3C;BraA07g018220.3C	0.680918
GO:0009813	flavonoid biosynthetic process	biological_process	BraA07g014730.3C;BraA09g063490.3C	0.680918
GO:0003837	beta-ureidopropionase activity	molecular_function	BraA09g008240.3C;BraA06g027830.3C	0.680918
GO:0004719	protein-L-isoaspartate (D-aspartate) O-methyltransferase activity	molecular_function	BraA03g026190.3C;BraA06g024450.3C	0.680918
GO:0006268	DNA unwinding involved in DNA replication	biological_process	BraA03g056460.3C;BraA01g006640.3C	0.680918
GO:0000978	RNA polymerase II core promoter proximal region sequence-specific DNA binding	molecular_function	BraA07g004220.3C;BraA03g043400.3C	0.680918
GO:0004427	inorganic diphosphatase activity	molecular_function	BraA02g021420.3C;BraA07g037210.3C	0.680918
GO:0001093	TFIIB-class transcription factor binding	molecular_function	BraA01g002910.3C;BraA08g020790.3C	0.680918
GO:0001158	enhancer sequence-specific DNA binding	molecular_function	BraA02g040510.3C;BraA06g034340.3C	0.680918
GO:0000033	alpha-1,3-mannosyltransferase activity	molecular_function	BraA05g000220.3C;BraA03g024580.3C	0.680918
GO:0005086	ARF guanyl-nucleotide exchange factor activity	molecular_function	BraA10g020750.3C;BraA06g044970.3C	0.680918
GO:0004126	cytidine deaminase activity	molecular_function	BraA03g055110.3C;BraA07g001260.3C	0.680918
GO:0000412	histone peptidyl-prolyl isomerization	biological_process	BraA01g016090.3C;BraA03g052420.3C	0.680918
GO:0002215	defense response to nematode	biological_process	BraA01g020550.3C;BraA10g029410.3C	0.680918
GO:0004496	mevalonate kinase activity	molecular_function	BraA02g040740.3C;BraA09g005020.3C	0.680918
GO:0008483	transaminase activity	molecular_function	BraA03g042440.3C;BraA03g042430.3C	0.680918
GO:0004610	phosphoacetylglucosamine mutase activity	molecular_function	BraA02g020080.3C;BraA07g035520.3C	0.680918
GO:0006541	glutamine metabolic process	biological_process	BraA04g020710.3C;BraA07g019130.3C	0.680918
GO:0003913	DNA photolyase activity	molecular_function	BraA05g000340.3C;BraA03g052360.3C	0.680918
GO:0016746	transferase activity, transferring acyl groups	molecular_function	BraA01g043990.3C;BraA05g041520.3C	0.680918
GO:0004655	porphobilinogen synthase activity	molecular_function	BraA10g007810.3C;BraA07g034610.3C	0.680918
GO:0000972	transcription-dependent tethering of RNA polymerase II gene DNA at nuclear periphery	biological_process	BraA06g010980.3C;BraA09g059070.3C	0.680918
GO:0004057	arginyltransferase activity	molecular_function	BraA05g035620.3C;BraA10g028490.3C	0.680918
GO:0004775	succinate-CoA ligase (ADP-forming) activity	molecular_function	BraA09g013400.3C;BraA07g000420.3C	0.680918
GO:0000064	L-ornithine transmembrane transporter activity	molecular_function	BraA04g024350.3C;BraA07g043270.3C	0.680918
GO:0008289	lipid binding	molecular_function	BraA10g012340.3C;BraA03g014060.3C	0.680918
GO:0005464	UDP-xylose transmembrane transporter activity	molecular_function	BraA07g018690.3C;BraA04g020240.3C	0.680918
GO:0008253	5'-nucleotidase activity	molecular_function	BraA03g057720.3C;BraA01g004850.3C	0.680918
GO:0004012	phospholipid-translocating ATPase activity	molecular_function	BraA06g037320.3C;BraA06g043230.3C	0.680918
GO:0015031	protein transport	biological_process	BraA02g014900.3C;BraA10g011330.3C	0.680918
GO:0000032	cell wall mannoprotein biosynthetic process	biological_process	BraA09g053330.3C;BraA04g018580.3C	0.680918
GO:0003899	DNA-directed RNA polymerase activity	molecular_function	BraA07g041070.3C;BraA09g029210.3C	0.680918
GO:0003868	4-hydroxyphenylpyruvate dioxygenase activity	molecular_function	BraA10g005300.3C;BraA09g063880.3C	0.680918
GO:0004107	chorismate synthase activity	molecular_function	BraA05g020020.3C;BraA08g004150.3C	0.680918
GO:0004325	ferrochelatase activity	molecular_function	BraA09g052590.3C;BraA06g033080.3C	0.680918
GO:0001933	negative regulation of protein phosphorylation	biological_process	BraA10g002490.3C;BraA09g065160.3C	0.680918
GO:0005519	cytoskeletal regulatory protein binding	molecular_function	BraA02g040560.3C;BraA06g034220.3C	0.680918
GO:0004760	serine-pyruvate transaminase activity	molecular_function	BraA03g042340.3C;BraA09g010000.3C	0.680918
GO:0004352	glutamate dehydrogenase (NAD+) activity	molecular_function	BraA02g002350.3C;BraA03g002960.3C	0.680918
GO:0000789	cytoplasmic chromatin	cellular_component	BraA02g017520.3C;BraA07g032580.3C	0.680918
GO:0004151	dihydroorotase activity	molecular_function	BraA03g050610.3C;BraA01g013550.3C	0.680918
GO:0005484	SNAP receptor activity	molecular_function	BraA03g041300.3C;BraA09g059840.3C	0.680918
GO:0009626	plant-type hypersensitive response	biological_process	BraA02g023960.3C;BraA07g040680.3C	0.680918
GO:0004160	dihydroxy-acid dehydratase activity	molecular_function	BraA09g035220.3C;BraA08g023680.3C	0.680918
GO:0004789	thiamine-phosphate diphosphorylase activity	molecular_function	BraA09g040160.3C;BraA08g035470.3C	0.680918
GO:0004930	G-protein coupled receptor activity	molecular_function	BraA06g038500.3C;BraA09g024700.3C	0.680918
GO:0005876	spindle microtubule	cellular_component	BraA06g036200.3C;BraA09g003940.3C	0.680918
GO:0003690	double-stranded DNA binding	molecular_function	BraA03g026980.3C;BraA06g032940.3C;BraA09g015820.3C;BraA05g003990.3C;BraA09g001340.3C;BraA09g066310.3C;BraA04g025630.3C;BraA01g034040.3C;BraA09g023710.3C;BraA03g024620.3C;BraA02g002150.3C;BraA10g013710.3C;BraA03g018830.3C;BraA06g019970.3C;BraA03g061140.3C;BraA04g000510.3C;BraA09g012540.3C;BraA07g041990.3C;BraA03g064330.3C;BraA01g029740.3C;BraA01g010940.3C;BraA10g012350.3C;BraA06g042700.3C;BraA08g0…	0.685737
GO:0000976	transcription regulatory region sequence-specific DNA binding	molecular_function	BraA09g032790.3C;BraA07g016980.3C;BraA09g007050.3C;BraA03g039490.3C;BraA07g005710.3C;BraA08g032870.3C;BraA07g037510.3C;BraA10g029700.3C;BraA03g044620.3C;BraA01g011450.3C;BraA07g028750.3C;BraA05g026400.3C;BraA09g009270.3C;BraA08g002650.3C;BraA05g009580.3C;BraA09g028560.3C;BraA06g006040.3C	0.699833
GO:0000122	negative regulation of transcription from RNA polymerase II promoter	biological_process	BraA03g011360.3C;BraA08g032220.3C;BraA10g017250.3C;BraA01g025270.3C;BraA06g003900.3C;BraA05g027480.3C;BraA09g052330.3C;BraA02g033960.3C;BraA09g061990.3C;BraA02g011020.3C;BraA06g007020.3C;BraA01g019220.3C;BraA03g011140.3C;BraA08g009350.3C;BraA10g017630.3C;BraA03g047500.3C;BraA09g022710.3C	0.699833
GO:0003755	peptidyl-prolyl cis-trans isomerase activity	molecular_function	BraA04g022020.3C;BraA02g024780.3C;BraA01g005640.3C;BraA01g032620.3C;BraA09g045580.3C;BraA02g013430.3C;BraA09g008630.3C;BraA07g002670.3C;BraA01g032890.3C;BraA04g001860.3C;BraA06g029970.3C;BraA03g041520.3C;BraA03g045840.3C;BraA05g038590.3C;BraA02g014500.3C;BraA09g021440.3C;BraA01g032790.3C	0.699833
GO:0000175	3'-5'-exoribonuclease activity	molecular_function	BraA02g024250.3C;BraA10g024540.3C;BraA01g018260.3C;BraA06g020470.3C;BraA09g017360.3C;BraA05g042050.3C;BraA10g033360.3C;BraA05g037970.3C;BraA09g051160.3C;BraA06g021620.3C;BraA09g010960.3C;BraA03g006400.3C;BraA09g050300.3C;BraA05g000620.3C;BraA08g017540.3C;BraA01g041370.3C;BraA07g024730.3C	0.699833
GO:0004364	glutathione transferase activity	molecular_function	BraA03g029060.3C;BraA07g041490.3C;BraA10g001580.3C;BraA07g026640.3C;BraA04g021100.3C;BraA04g010210.3C;BraA02g035530.3C;BraA07g041480.3C;BraA07g034830.3C;BraA02g019490.3C;BraA07g026610.3C;BraA09g017650.3C;BraA06g026030.3C;BraA07g020480.3C;BraA02g006620.3C;BraA03g024700.3C;BraA03g016430.3C;BraA06g043430.3C;BraA04g009870.3C;BraA06g007200.3C;BraA09g009970.3C;BraA07g034800.3C;BraA09g001660.3C;BraA02g0…	0.700057
GO:0005783	endoplasmic reticulum	cellular_component	BraA05g009130.3C;BraA06g014890.3C;BraA05g042350.3C;BraA03g007630.3C;BraA10g004330.3C;BraA03g022550.3C;BraA09g026840.3C;BraA05g014270.3C;BraA06g002370.3C;BraA06g015830.3C;BraA01g005870.3C;BraA05g013280.3C;BraA09g060050.3C;BraA01g017820.3C;BraA01g020950.3C;BraA05g018100.3C;BraA09g054760.3C;BraA05g041530.3C;BraA06g015820.3C;BraA04g007570.3C;BraA02g020600.3C;BraA08g033410.3C;BraA05g038030.3C;BraA09g0…	0.700058
GO:0005840	ribosome	cellular_component	BraA09g008360.3C;BraA07g030640.3C;BraA10g013130.3C;BraA02g013510.3C;BraA02g018600.3C;BraA02g014310.3C;BraA04g005560.3C;BraA07g021650.3C;BraA06g041890.3C	0.700479
GO:0009409	response to cold	biological_process	BraA06g019540.3C;BraA05g024380.3C;BraA03g027010.3C;BraA01g031350.3C;BraA06g038770.3C;BraA09g025930.3C;BraA07g014510.3C;BraA09g029800.3C;BraA09g024510.3C	0.700479
GO:0003852	2-isopropylmalate synthase activity	molecular_function	BraA03g043740.3C;BraA04g024980.3C;BraA02g042670.3C;BraA04g024970.3C;BraA03g043750.3C;BraA06g014130.3C;BraA02g027350.3C;BraA03g043730.3C;BraA02g042660.3C	0.700479
GO:0004351	glutamate decarboxylase activity	molecular_function	BraA06g022760.3C;BraA02g035300.3C;BraA02g006980.3C;BraA01g034890.3C;BraA03g007950.3C;BraA07g031850.3C;BraA10g022660.3C;BraA03g007920.3C;BraA09g023350.3C	0.700479
GO:0004739	pyruvate dehydrogenase (acetyl-transferring) activity	molecular_function	BraA08g023520.3C;BraA09g039180.3C;BraA07g034950.3C;BraA01g027850.3C;BraA03g015810.3C;BraA09g065970.3C;BraA09g034910.3C;BraA10g009220.3C;BraA02g016100.3C	0.700479
GO:0006629	lipid metabolic process	biological_process	BraA10g013340.3C;BraA02g013340.3C;BraA03g013500.3C;BraA06g023410.3C;BraA10g018970.3C;BraA03g013470.3C;BraA03g013510.3C;BraA02g013360.3C;BraA03g013480.3C;BraA03g051450.3C;BraA09g029420.3C;BraA09g047320.3C;BraA09g047330.3C;BraA03g010330.3C;BraA06g021390.3C;BraA07g033430.3C;BraA02g013330.3C;BraA05g034940.3C;BraA10g013280.3C;BraA01g039260.3C;BraA10g013330.3C	0.703659
GO:0000209	protein polyubiquitination	biological_process	BraA08g002950.3C;BraA07g030480.3C;BraA10g003720.3C;BraA06g013080.3C;BraA06g020250.3C;BraA08g023100.3C;BraA02g016450.3C;BraA08g019040.3C;BraA05g020820.3C;BraA09g019580.3C;BraA06g039660.3C;BraA02g000580.3C;BraA10g007240.3C;BraA05g029750.3C;BraA03g021670.3C;BraA10g014230.3C;BraA05g027210.3C;BraA03g009910.3C;BraA06g011160.3C;BraA07g020200.3C;BraA08g030250.3C;BraA07g023560.3C;BraA09g023230.3C;BraA05g0…	0.705485
GO:0005871	kinesin complex	cellular_component	BraA09g045700.3C;BraA05g009200.3C;BraA04g020460.3C;BraA06g009220.3C;BraA06g009230.3C	0.717032
GO:0030586	[methionine synthase] reductase activity	molecular_function	BraA02g004520.3C;BraA03g055590.3C;BraA01g007480.3C;BraA01g021970.3C;BraA08g018180.3C	0.717032
GO:0000070	mitotic sister chromatid segregation	biological_process	BraA03g063680.3C;BraA06g007810.3C;BraA08g017510.3C;BraA03g056550.3C;BraA09g061680.3C	0.717032
GO:0000712	resolution of meiotic recombination intermediates	biological_process	BraA03g015030.3C;BraA02g044360.3C;BraA06g027370.3C;BraA01g008580.3C;BraA06g035610.3C	0.717032
GO:0003942	N-acetyl-gamma-glutamyl-phosphate reductase activity	molecular_function	BraA09g015260.3C;BraA10g015220.3C;BraA08g030050.3C;BraA09g034090.3C;BraA09g028370.3C	0.717032
GO:0009416	response to light stimulus	biological_process	BraA03g022210.3C;BraA05g016190.3C;BraA05g002660.3C;BraA03g024150.3C;BraA04g032040.3C	0.717032
GO:0004766	spermidine synthase activity	molecular_function	BraA02g014800.3C;BraA07g013960.3C;BraA08g026350.3C;BraA10g011480.3C;BraA07g013950.3C	0.717032
GO:0000257	nitrilase activity	molecular_function	BraA02g006840.3C;BraA06g021550.3C;BraA02g009700.3C;BraA03g012980.3C;BraA09g029370.3C	0.717032
GO:0000086	G2/M transition of mitotic cell cycle	biological_process	BraA05g028580.3C;BraA03g016840.3C;BraA06g021810.3C;BraA05g013020.3C;BraA06g021820.3C	0.717032
GO:0003857	3-hydroxyacyl-CoA dehydrogenase activity	molecular_function	BraA01g008530.3C;BraA09g060990.3C;BraA08g018800.3C;BraA01g040180.3C;BraA03g054820.3C	0.717032
GO:0000774	adenyl-nucleotide exchange factor activity	molecular_function	BraA03g053330.3C;BraA10g022340.3C;BraA08g007650.3C;BraA08g019730.3C;BraA01g017530.3C	0.717032
GO:0000152	nuclear ubiquitin ligase complex	cellular_component	BraA05g040920.3C;BraA05g011840.3C;BraA04g023670.3C;BraA03g030660.3C;BraA04g023680.3C	0.717032
GO:0005742	mitochondrial outer membrane translocase complex	cellular_component	BraA04g014160.3C;BraA04g014170.3C;BraA04g014150.3C;BraA04g014290.3C;BraA09g014580.3C	0.717032
GO:0005544	calcium-dependent phospholipid binding	molecular_function	BraA06g025400.3C;BraA09g045960.3C;BraA02g043260.3C;BraA09g062580.3C;BraA02g043270.3C	0.717032
GO:0002230	positive regulation of defense response to virus by host	biological_process	BraA06g031940.3C;BraA10g024340.3C;BraA03g006570.3C;BraA09g006090.3C;BraA10g024330.3C	0.717032
GO:0004579	dolichyl-diphosphooligosaccharide-protein glycotransferase activity	molecular_function	BraA01g011920.3C;BraA09g032900.3C;BraA05g023510.3C;BraA07g017270.3C;BraA09g009460.3C	0.717032
GO:0000221	vacuolar proton-transporting V-type ATPase, V1 domain	cellular_component	BraA01g004090.3C;BraA03g058650.3C;BraA08g016110.3C;BraA09g060540.3C;BraA06g008940.3C	0.717032
GO:0005575	cellular_component	cellular_component	BraA01g030440.3C;BraA04g020950.3C;BraA08g004070.3C;BraA06g023240.3C;BraA08g007420.3C;BraA01g023980.3C;BraA09g037010.3C;BraA06g035860.3C;BraA10g009890.3C;BraA08g025760.3C;BraA06g039330.3C;BraA07g006380.3C;BraA05g038470.3C;BraA07g013670.3C;BraA07g042720.3C;BraA03g006520.3C;BraA02g000650.3C;BraA05g031680.3C;BraA06g024460.3C;BraA02g019690.3C;BraA05g015250.3C;BraA06g022900.3C;BraA03g032920.3C;BraA02g0…	0.733212
GO:0000220	vacuolar proton-transporting V-type ATPase, V0 domain	cellular_component	BraA05g015360.3C;BraA07g016110.3C;BraA03g059000.3C;BraA03g024870.3C;BraA06g015530.3C;BraA03g035640.3C;BraA05g041730.3C;BraA08g019490.3C;BraA01g000260.3C;BraA08g022670.3C;BraA09g055550.3C;BraA02g020410.3C;BraA03g019850.3C;BraA08g009970.3C;BraA07g018920.3C;BraA04g020400.3C;BraA04g015650.3C;BraA08g022740.3C;BraA08g028030.3C;BraA01g003590.3C	0.736164
GO:0003697	single-stranded DNA binding	molecular_function	BraA02g041010.3C;BraA09g001260.3C;BraA05g028780.3C;BraA02g020860.3C;BraA09g034320.3C;BraA06g033580.3C;BraA01g025600.3C;BraA09g033930.3C;BraA03g049040.3C;BraA01g034310.3C;BraA02g027070.3C;BraA07g038180.3C;BraA06g037220.3C;BraA02g027390.3C;BraA06g042800.3C;BraA09g027560.3C	0.736402
GO:0004069	L-aspartate:2-oxoglutarate aminotransferase activity	molecular_function	BraA10g020790.3C;BraA02g003960.3C;BraA03g063280.3C;BraA09g055020.3C;BraA09g015550.3C;BraA01g005980.3C;BraA02g015680.3C;BraA09g015470.3C;BraA05g013640.3C;BraA09g012690.3C;BraA02g008260.3C;BraA04g016260.3C	0.740255
GO:0000105	histidine biosynthetic process	biological_process	BraA01g027200.3C;BraA09g033260.3C;BraA06g027330.3C;BraA04g011710.3C;BraA09g018200.3C;BraA05g024760.3C;BraA03g018920.3C;BraA09g008020.3C;BraA01g017670.3C;BraA01g031640.3C;BraA02g020580.3C;BraA05g023920.3C	0.740255
GO:0001708	cell fate specification	biological_process	BraA07g012310.3C;BraA08g006320.3C;BraA07g016350.3C;BraA01g030110.3C;BraA04g013890.3C;BraA06g010890.3C;BraA09g003340.3C;BraA07g001540.3C;BraA07g029670.3C;BraA03g026450.3C;BraA08g025030.3C;BraA09g037210.3C	0.740255
GO:0004791	thioredoxin-disulfide reductase activity	molecular_function	BraA08g020810.3C;BraA09g010890.3C;BraA01g006060.3C;BraA09g062190.3C;BraA03g022020.3C;BraA05g002370.3C;BraA03g059420.3C;BraA09g062180.3C;BraA04g006190.3C;BraA04g012150.3C;BraA09g010880.3C;BraA06g030500.3C	0.740255
GO:0000164	protein phosphatase type 1 complex	cellular_component	BraA04g022590.3C;BraA05g006230.3C;BraA05g013360.3C;BraA06g020080.3C;BraA03g024710.3C;BraA02g011220.3C;BraA03g052580.3C;BraA05g014800.3C;BraA10g017040.3C;BraA10g010610.3C;BraA03g015080.3C;BraA03g021110.3C	0.740255
GO:0005385	zinc ion transmembrane transporter activity	molecular_function	BraA09g051440.3C;BraA08g012460.3C;BraA07g033310.3C;BraA05g014730.3C;BraA05g034330.3C;BraA08g000240.3C;BraA08g010130.3C;BraA03g055460.3C;BraA04g032310.3C;BraA03g055500.3C;BraA01g007590.3C;BraA05g014190.3C;BraA01g007580.3C;BraA01g007120.3C;BraA03g024260.3C;BraA05g026210.3C;BraA09g033750.3C;BraA07g030930.3C;BraA10g004050.3C;BraA07g001700.3C;BraA05g034810.3C;BraA10g004060.3C;BraA05g012640.3C;BraA06g0…	0.740461
GO:0009055	electron carrier activity	molecular_function	BraA01g016380.3C;BraA02g029150.3C;BraA01g000710.3C;BraA07g018210.3C;BraA03g002550.3C;BraA03g001390.3C;BraA01g010710.3C;BraA02g005380.3C;BraA09g061210.3C;BraA03g048770.3C;BraA07g010390.3C;BraA03g025060.3C;BraA02g031520.3C;BraA07g010400.3C;BraA01g021740.3C;BraA08g008660.3C;BraA10g032390.3C;BraA01g005500.3C;BraA09g034290.3C;BraA06g008360.3C;BraA09g034280.3C;BraA02g029140.3C;BraA03g063100.3C;BraA10g0…	0.740461
GO:0003725	double-stranded RNA binding	molecular_function	BraA10g018330.3C;BraA04g020290.3C;BraA08g032470.3C;BraA06g006590.3C;BraA10g029430.3C;BraA09g052080.3C;BraA04g013660.3C;BraA07g018760.3C	0.752171
GO:0005543	phospholipid binding	molecular_function	BraA07g007380.3C;BraA05g005280.3C;BraA08g021980.3C;BraA01g027320.3C;BraA09g050650.3C;BraA08g019570.3C;BraA04g001450.3C;BraA02g045170.3C	0.752171
GO:0004748	ribonucleoside-diphosphate reductase activity, thioredoxin disulfide as acceptor	molecular_function	BraA07g009520.3C;BraA10g029930.3C;BraA06g042290.3C;BraA03g051350.3C;BraA08g022480.3C;BraA06g037880.3C;BraA07g015380.3C;BraA03g039830.3C	0.752171
GO:0000784	nuclear chromosome, telomeric region	cellular_component	BraA08g033710.3C;BraA05g019530.3C;BraA06g003600.3C;BraA09g041170.3C;BraA06g038150.3C;BraA01g023400.3C;BraA03g044890.3C;BraA08g003280.3C	0.752171
GO:0005319	lipid transporter activity	molecular_function	BraA07g018450.3C;BraA08g023050.3C;BraA05g026930.3C;BraA01g022310.3C;BraA04g020050.3C;BraA01g033110.3C;BraA03g054370.3C;BraA09g042870.3C	0.752171
GO:0000123	histone acetyltransferase complex	cellular_component	BraA03g026260.3C;BraA08g003690.3C;BraA01g001580.3C;BraA07g041000.3C;BraA04g007610.3C;BraA02g024440.3C;BraA09g045440.3C;BraA04g005280.3C	0.752171
GO:0000104	succinate dehydrogenase activity	molecular_function	BraA02g037690.3C;BraA06g037640.3C;BraA02g045630.3C;BraA09g003180.3C;BraA09g009390.3C;BraA02g045020.3C;BraA10g031280.3C;BraA07g017190.3C	0.752171
GO:0005829	cytosol	cellular_component	BraA02g036950.3C;BraA03g001900.3C;BraA03g056280.3C;BraA06g031790.3C;BraA05g008670.3C;BraA06g031760.3C;BraA06g023440.3C;BraA09g007000.3C;BraA10g011950.3C;BraA01g013410.3C;BraA09g002320.3C;BraA06g007490.3C;BraA01g021100.3C;BraA09g058860.3C;BraA08g009120.3C;BraA06g027930.3C;BraA02g020610.3C;BraA10g028650.3C;BraA04g009610.3C;BraA07g027260.3C;BraA02g007940.3C;BraA04g009980.3C;BraA07g030970.3C;BraA07g0…	0.758837
GO:0008270	zinc ion binding	molecular_function	BraA03g007080.3C;BraA05g032770.3C;BraA01g018330.3C;BraA03g036390.3C;BraA09g034000.3C;BraA07g003210.3C;BraA07g007330.3C;BraA06g004060.3C;BraA06g019630.3C;BraA03g019730.3C;BraA05g032740.3C;BraA06g035240.3C;BraA03g018780.3C;BraA05g011030.3C;BraA08g002430.3C;BraA04g026790.3C;BraA04g032010.3C;BraA05g038280.3C;BraA08g031860.3C;BraA06g044040.3C;BraA03g059720.3C;BraA01g025070.3C;BraA09g039510.3C;BraA09g0…	0.761272
GO:0006869	lipid transport	biological_process	BraA01g026940.3C;BraA09g016640.3C;BraA09g015810.3C;BraA06g009500.3C;BraA02g021830.3C;BraA07g037610.3C;BraA09g026280.3C;BraA04g032420.3C;BraA05g025150.3C;BraA01g013110.3C;BraA02g027930.3C;BraA08g033450.3C;BraA03g040080.3C;BraA09g009870.3C;BraA05g015810.3C;BraA01g021450.3C;BraA09g015570.3C;BraA09g015800.3C;BraA03g063330.3C	0.767677
GO:0004004	ATP-dependent RNA helicase activity	molecular_function	BraA08g001040.3C;BraA06g014660.3C;BraA02g037610.3C;BraA08g024660.3C;BraA02g025020.3C;BraA09g029900.3C;BraA08g028450.3C;BraA01g009950.3C;BraA07g027080.3C;BraA10g030430.3C;BraA03g027040.3C	0.781327
GO:0004620	phospholipase activity	molecular_function	BraA03g025810.3C;BraA01g001770.3C;BraA01g001780.3C;BraA03g060440.3C;BraA09g016200.3C;BraA07g021950.3C;BraA05g031290.3C;BraA01g007900.3C;BraA03g037140.3C;BraA07g005520.3C;BraA01g036460.3C	0.781327
GO:0004332	fructose-bisphosphate aldolase activity	molecular_function	BraA02g034390.3C;BraA04g025970.3C;BraA01g017270.3C;BraA06g044580.3C;BraA04g025980.3C;BraA04g025990.3C;BraA09g043990.3C;BraA04g006580.3C;BraA01g000200.3C;BraA09g055600.3C;BraA04g015630.3C	0.781327
GO:0000347	THO complex	cellular_component	BraA09g002130.3C;BraA03g043150.3C;BraA02g032740.3C;BraA05g041550.3C;BraA03g029320.3C;BraA06g044060.3C;BraA06g041970.3C;BraA03g042100.3C;BraA02g003210.3C;BraA10g007500.3C;BraA06g042940.3C	0.781327
GO:0000082	G1/S transition of mitotic cell cycle	biological_process	BraA08g016120.3C;BraA01g004130.3C;BraA09g063530.3C;BraA09g054240.3C;BraA10g005740.3C;BraA04g014530.3C;BraA01g039060.3C;BraA07g020710.3C;BraA03g001100.3C;BraA10g032640.3C;BraA03g058630.3C	0.781327
GO:0001709	cell fate determination	biological_process	BraA09g020380.3C;BraA10g002310.3C;BraA05g034410.3C;BraA06g043200.3C	0.787887
GO:0000386	second spliceosomal transesterification activity	molecular_function	BraA02g003910.3C;BraA10g002470.3C;BraA01g030750.3C;BraA08g035150.3C	0.787887
GO:0004623	phospholipase A2 activity	molecular_function	BraA09g011960.3C;BraA01g008180.3C;BraA05g016980.3C;BraA08g018570.3C	0.787887
GO:0006857	oligopeptide transport	biological_process	BraA02g013080.3C;BraA02g028660.3C;BraA09g027830.3C;BraA02g044590.3C	0.787887
GO:0004489	methylenetetrahydrofolate reductase (NAD(P)H) activity	molecular_function	BraA07g024100.3C;BraA09g052610.3C;BraA05g004120.3C;BraA09g049850.3C	0.787887
GO:0009860	pollen tube growth	biological_process	BraA09g003530.3C;BraA09g061540.3C;BraA04g026560.3C;BraA06g007630.3C	0.787887
GO:0005496	steroid binding	molecular_function	BraA06g018140.3C;BraA04g018420.3C;BraA06g024810.3C;BraA05g015710.3C	0.787887
GO:0005471	ATP:ADP antiporter activity	molecular_function	BraA07g043110.3C;BraA07g025740.3C;BraA10g028240.3C;BraA06g011560.3C	0.787887
GO:0000814	ESCRT II complex	cellular_component	BraA03g053460.3C;BraA02g001510.3C;BraA10g031450.3C;BraA01g017760.3C	0.787887
GO:0004594	pantothenate kinase activity	molecular_function	BraA09g017230.3C;BraA01g005840.3C;BraA08g017190.3C;BraA01g003040.3C	0.787887
GO:0004638	phosphoribosylaminoimidazole carboxylase activity	molecular_function	BraA01g032530.3C;BraA05g007860.3C;BraA04g026720.3C;BraA03g019650.3C	0.787887
GO:0005267	potassium channel activity	molecular_function	BraA08g012760.3C;BraA03g048110.3C;BraA09g002310.3C;BraA01g009670.3C	0.787887
GO:0004013	adenosylhomocysteinase activity	molecular_function	BraA07g009290.3C;BraA04g008150.3C;BraA08g006100.3C;BraA03g040880.3C	0.787887
GO:0000303	response to superoxide	biological_process	BraA01g011440.3C;BraA09g032860.3C;BraA03g049280.3C;BraA08g008880.3C	0.787887
GO:0004839	ubiquitin activating enzyme activity	molecular_function	BraA04g021420.3C;BraA05g014140.3C;BraA03g016030.3C;BraA10g029160.3C	0.787887
GO:0004828	serine-tRNA ligase activity	molecular_function	BraA08g031350.3C;BraA02g040760.3C;BraA06g033930.3C;BraA09g005060.3C	0.787887
GO:0004127	cytidylate kinase activity	molecular_function	BraA01g016030.3C;BraA09g050000.3C;BraA02g041260.3C;BraA06g033310.3C	0.787887
GO:0009267	cellular response to starvation	biological_process	BraA06g005940.3C;BraA09g047710.3C;BraA02g024700.3C;BraA09g037870.3C	0.787887
GO:0043161	proteasome-mediated ubiquitin-dependent protein catabolic process	biological_process	BraA10g028560.3C;BraA10g032000.3C;BraA09g020640.3C;BraA03g019350.3C	0.787887
GO:0005635	nuclear envelope	cellular_component	BraA04g010040.3C;BraA03g030980.3C;BraA07g041900.3C;BraA05g030160.3C	0.787887
GO:0003849	3-deoxy-7-phosphoheptulonate synthase activity	molecular_function	BraA01g004550.3C;BraA07g041410.3C;BraA01g000850.3C;BraA09g040590.3C	0.787887
GO:0005770	late endosome	cellular_component	BraA02g015520.3C;BraA10g010670.3C;BraA06g003920.3C;BraA10g019760.3C	0.787887
GO:0000054	ribosomal subunit export from nucleus	biological_process	BraA03g005830.3C;BraA10g013190.3C;BraA02g013440.3C;BraA09g046440.3C	0.787887
GO:0005384	manganese ion transmembrane transporter activity	molecular_function	BraA05g033000.3C;BraA09g048620.3C;BraA07g023220.3C;BraA04g002910.3C	0.787887
GO:0005777	peroxisome	cellular_component	BraA10g005190.3C;BraA01g009820.3C;BraA02g006430.3C;BraA05g032950.3C;BraA09g004150.3C;BraA04g004740.3C;BraA04g004790.3C;BraA05g018970.3C;BraA10g002820.3C;BraA03g030220.3C;BraA06g035090.3C;BraA08g019600.3C;BraA02g045180.3C;BraA05g020270.3C;BraA09g026060.3C;BraA04g030630.3C;BraA10g000310.3C;BraA08g001870.3C;BraA06g030050.3C;BraA09g012020.3C;BraA03g028080.3C;BraA02g023170.3C;BraA02g037570.3C;BraA07g0…	0.791429
GO:0004185	serine-type carboxypeptidase activity	molecular_function	BraA04g017830.3C;BraA01g006920.3C;BraA05g011320.3C;BraA03g003410.3C;BraA03g045810.3C;BraA05g041020.3C;BraA01g028800.3C;BraA05g037780.3C;BraA10g018620.3C;BraA03g064600.3C;BraA06g021210.3C;BraA09g036580.3C;BraA06g011100.3C;BraA08g024550.3C;BraA09g033660.3C;BraA02g033790.3C;BraA02g025360.3C;BraA02g003080.3C;BraA09g009950.3C;BraA05g036370.3C;BraA02g010110.3C;BraA08g017910.3C;BraA03g042290.3C;BraA03g0…	0.796651
GO:0009672	auxin:proton symporter activity	molecular_function	BraA02g045830.3C;BraA07g027360.3C;BraA09g009840.3C;BraA02g023530.3C;BraA06g016380.3C;BraA05g018320.3C;BraA07g035760.3C	0.802283
GO:0003006	developmental process involved in reproduction	biological_process	BraA01g014850.3C;BraA03g051660.3C;BraA08g020980.3C;BraA07g043190.3C;BraA01g019200.3C;BraA02g024370.3C;BraA10g011880.3C	0.802283
GO:0003865	3-oxo-5-alpha-steroid 4-dehydrogenase activity	molecular_function	BraA07g015220.3C;BraA09g010500.3C;BraA03g007270.3C;BraA03g043190.3C;BraA03g043180.3C;BraA09g046170.3C;BraA10g023600.3C	0.802283
GO:0004550	nucleoside diphosphate kinase activity	molecular_function	BraA06g026850.3C;BraA02g028590.3C;BraA09g020880.3C;BraA03g042760.3C;BraA09g007780.3C;BraA08g029270.3C;BraA09g027590.3C	0.802283
GO:0000276	mitochondrial proton-transporting ATP synthase complex, coupling factor F(o)	cellular_component	BraA08g018560.3C;BraA06g038990.3C;BraA09g043500.3C;BraA01g017000.3C;BraA08g019850.3C;BraA03g045980.3C;BraA01g008130.3C	0.802283
GO:0005093	Rab GDP-dissociation inhibitor activity	molecular_function	BraA05g038900.3C;BraA04g002170.3C;BraA01g041980.3C;BraA05g004060.3C;BraA02g003030.3C;BraA09g049810.3C;BraA09g049770.3C	0.802283
GO:0004345	glucose-6-phosphate dehydrogenase activity	molecular_function	BraA10g025630.3C;BraA07g020310.3C;BraA09g003170.3C;BraA08g009110.3C;BraA08g025060.3C;BraA06g037720.3C;BraA07g012320.3C	0.802283
GO:0003937	IMP cyclohydrolase activity	molecular_function	BraA03g012450.3C;BraA08g002270.3C;BraA09g042940.3C;BraA06g000230.3C;BraA03g008150.3C;BraA03g019680.3C;BraA04g024940.3C	0.802283
GO:0000813	ESCRT I complex	cellular_component	BraA08g014400.3C;BraA04g006330.3C;BraA06g015670.3C;BraA09g025230.3C;BraA01g012260.3C;BraA03g035270.3C;BraA02g005180.3C	0.802283
GO:0000987	core promoter proximal region sequence-specific DNA binding	molecular_function	BraA07g041030.3C;BraA07g026860.3C;BraA09g007640.3C;BraA06g037920.3C;BraA09g003050.3C;BraA05g001400.3C;BraA03g024160.3C	0.802283
GO:0004435	phosphatidylinositol phospholipase C activity	molecular_function	BraA01g041130.3C;BraA04g028190.3C;BraA10g016560.3C;BraA10g016590.3C;BraA05g037710.3C;BraA03g021270.3C;BraA09g001030.3C;BraA04g008500.3C;BraA02g011480.3C;BraA02g011500.3C;BraA06g044830.3C;BraA05g015080.3C;BraA03g011670.3C;BraA09g001020.3C	0.805769
GO:0004707	MAP kinase activity	molecular_function	BraA09g063060.3C;BraA05g032400.3C;BraA04g002210.3C;BraA05g016950.3C;BraA04g002220.3C;BraA03g022450.3C;BraA05g003220.3C;BraA06g001320.3C;BraA03g008950.3C;BraA06g007050.3C;BraA07g028610.3C;BraA01g037110.3C;BraA09g049620.3C;BraA07g024060.3C	0.805769
GO:0004197	cysteine-type endopeptidase activity	molecular_function	BraA09g052900.3C;BraA10g005000.3C;BraA03g010770.3C;BraA09g005670.3C;BraA03g027300.3C;BraA09g002400.3C;BraA07g015320.3C;BraA06g018610.3C;BraA06g043990.3C;BraA02g030380.3C;BraA07g002760.3C;BraA05g022900.3C;BraA09g064040.3C;BraA04g025450.3C;BraA01g006400.3C;BraA06g028900.3C;BraA08g022650.3C;BraA09g053550.3C;BraA08g035710.3C;BraA08g027620.3C;BraA04g025440.3C;BraA02g010350.3C;BraA02g032300.3C;BraA10g0…	0.813356
GO:0002229	defense response to oomycetes	biological_process	BraA06g031740.3C;BraA03g027270.3C;BraA03g059300.3C;BraA04g016310.3C;BraA10g018070.3C;BraA08g022020.3C;BraA10g018080.3C;BraA10g018110.3C;BraA03g027290.3C;BraA10g018010.3C;BraA02g042070.3C;BraA10g018050.3C;BraA09g028040.3C;BraA03g010860.3C;BraA02g040990.3C;BraA10g018100.3C;BraA03g061220.3C;BraA06g020940.3C;BraA09g014290.3C;BraA06g031900.3C;BraA07g028550.3C;BraA07g037800.3C;BraA10g018060.3C;BraA02g0…	0.815962
GO:0005743	mitochondrial inner membrane	cellular_component	BraA04g021480.3C;BraA06g013290.3C;BraA03g000920.3C;BraA07g038190.3C;BraA07g026710.3C;BraA08g029210.3C;BraA02g000690.3C;BraA01g040620.3C;BraA08g028810.3C;BraA05g014080.3C	0.820433
GO:0004725	protein tyrosine phosphatase activity	molecular_function	BraA05g039240.3C;BraA04g011650.3C;BraA05g027880.3C;BraA07g036310.3C;BraA06g021320.3C;BraA03g041770.3C;BraA09g059480.3C;BraA01g030450.3C;BraA07g019820.3C;BraA07g007390.3C	0.820433
GO:0004784	superoxide dismutase activity	molecular_function	BraA10g009320.3C;BraA03g015660.3C;BraA10g006220.3C;BraA06g030740.3C;BraA01g015820.3C;BraA03g015650.3C;BraA10g021990.3C;BraA09g062610.3C;BraA04g020160.3C;BraA01g039910.3C	0.820433
GO:0004871	signal transducer activity	molecular_function	BraA03g017550.3C;BraA05g041940.3C;BraA10g011980.3C;BraA10g001640.3C;BraA03g039050.3C;BraA04g025570.3C;BraA07g016450.3C;BraA07g011780.3C;BraA03g040870.3C;BraA03g039450.3C;BraA09g060220.3C;BraA10g011840.3C;BraA06g038310.3C;BraA06g027780.3C;BraA09g008220.3C;BraA02g005000.3C;BraA09g008950.3C;BraA03g034220.3C;BraA09g013970.3C;BraA09g042650.3C;BraA03g060840.3C;BraA09g034600.3C;BraA04g008090.3C;BraA05g0…	0.821559
GO:0004309	exopolyphosphatase activity	molecular_function	BraA08g032790.3C	0.82518
GO:0000460	maturation of 5.8S rRNA	biological_process	BraA02g019950.3C	0.82518
GO:0001525	angiogenesis	biological_process	BraA07g040740.3C	0.82518
GO:0030136	clathrin-coated vesicle	cellular_component	BraA03g048040.3C	0.82518
GO:0000374	Group III intron splicing	biological_process	BraA09g035010.3C	0.82518
GO:0004198	calcium-dependent cysteine-type endopeptidase activity	molecular_function	BraA06g000590.3C	0.82518
GO:0006904	vesicle docking involved in exocytosis	biological_process	BraA03g055470.3C	0.82518
GO:0004558	alpha-1,4-glucosidase activity	molecular_function	BraA07g031290.3C	0.82518
GO:0004631	phosphomevalonate kinase activity	molecular_function	BraA08g009020.3C	0.82518
GO:0001129	RNA polymerase II transcription factor activity, TBP-class protein binding, involved in preinitiation complex assembly	molecular_function	BraA07g037930.3C	0.82518
GO:0008234	cysteine-type peptidase activity	molecular_function	BraA09g048430.3C	0.82518
GO:0004305	ethanolamine kinase activity	molecular_function	BraA07g017790.3C	0.82518
GO:0005355	glucose transmembrane transporter activity	molecular_function	BraA10g022410.3C	0.82518
GO:0002376	immune system process	biological_process	BraA08g007210.3C	0.82518
GO:0008284	positive regulation of cell proliferation	biological_process	BraA09g049790.3C	0.82518
GO:0030096	plasma membrane-derived thylakoid photosystem II	cellular_component	BraA01g008860.3C	0.82518
GO:0006520	cellular amino acid metabolic process	biological_process	BraA06g000280.3C	0.82518
GO:0009011	starch synthase activity	molecular_function	BraA06g029210.3C	0.82518
GO:0001735	prenylcysteine oxidase activity	molecular_function	BraA06g027360.3C	0.82518
GO:0004359	glutaminase activity	molecular_function	BraA10g018290.3C	0.82518
GO:0008615	pyridoxine biosynthetic process	biological_process	BraA04g032160.3C	0.82518
GO:0004298	threonine-type endopeptidase activity	molecular_function	BraA09g000490.3C	0.82518
GO:0002039	p53 binding	molecular_function	BraA01g027190.3C	0.82518
GO:0019172	glyoxalase III activity	molecular_function	BraA05g041370.3C	0.82518
GO:0009742	brassinosteroid mediated signaling pathway	biological_process	BraA04g000090.3C	0.82518
GO:0001649	osteoblast differentiation	biological_process	BraA06g020460.3C	0.82518
GO:0004482	mRNA (guanine-N7-)-methyltransferase activity	molecular_function	BraA09g043420.3C	0.82518
GO:0003842	1-pyrroline-5-carboxylate dehydrogenase activity	molecular_function	BraA06g026150.3C	0.82518
GO:0009408	response to heat	biological_process	BraA01g018560.3C	0.82518
GO:0000372	Group I intron splicing	biological_process	BraA05g040670.3C	0.82518
GO:0008807	carboxyvinyl-carboxyphosphonate phosphorylmutase activity	molecular_function	BraA07g040530.3C	0.82518
GO:0000445	THO complex part of transcription export complex	cellular_component	BraA08g025260.3C	0.82518
GO:0003730	mRNA 3'-UTR binding	molecular_function	BraA09g047850.3C	0.82518
GO:0005253	anion channel activity	molecular_function	BraA01g034390.3C	0.82518
GO:0006694	steroid biosynthetic process	biological_process	BraA03g046530.3C	0.82518
GO:0004835	tubulin-tyrosine ligase activity	molecular_function	BraA04g010280.3C	0.82518
GO:0005786	signal recognition particle, endoplasmic reticulum targeting	cellular_component	BraA05g003740.3C	0.82518
GO:0005929	cilium	cellular_component	BraA04g032500.3C	0.82518
GO:0009723	response to ethylene	biological_process	BraA03g037470.3C	0.82518
GO:0016197	endosomal transport	biological_process	BraA01g033370.3C	0.82518
GO:0005753	mitochondrial proton-transporting ATP synthase complex	cellular_component	BraA09g014610.3C	0.82518
GO:0008173	RNA methyltransferase activity	molecular_function	BraA06g037820.3C	0.82518
GO:0003896	DNA primase activity	molecular_function	BraA02g015110.3C	0.82518
GO:0005049	nuclear export signal receptor activity	molecular_function	BraA05g042590.3C	0.82518
GO:0006369	termination of RNA polymerase II transcription	biological_process	BraA09g054960.3C	0.82518
GO:0003858	3-hydroxybutyrate dehydrogenase activity	molecular_function	BraA07g008320.3C	0.82518
GO:0004157	dihydropyrimidinase activity	molecular_function	BraA10g026120.3C	0.82518
GO:0006723	cuticle hydrocarbon biosynthetic process	biological_process	BraA06g037420.3C	0.82518
GO:0000481	maturation of 5S rRNA	biological_process	BraA07g009380.3C	0.82518
GO:0071567	UFM1 hydrolase activity	molecular_function	BraA06g018590.3C	0.82518
GO:0001570	vasculogenesis	biological_process	BraA10g027060.3C	0.82518
GO:0006474	N-terminal protein amino acid acetylation	biological_process	BraA03g031920.3C	0.82518
GO:0004000	adenosine deaminase activity	molecular_function	BraA09g025480.3C	0.82518
GO:0000737	DNA catabolic process, endonucleolytic	biological_process	BraA09g013540.3C	0.82518
GO:0000188	inactivation of MAPK activity	biological_process	BraA04g004810.3C	0.82518
GO:0001729	ceramide kinase activity	molecular_function	BraA03g015520.3C	0.82518
GO:0003922	GMP synthase (glutamine-hydrolyzing) activity	molecular_function	BraA09g015120.3C	0.82518
GO:0000176	nuclear exosome (RNase complex)	cellular_component	BraA08g035390.3C	0.82518
GO:0005875	microtubule associated complex	cellular_component	BraA10g023050.3C	0.82518
GO:0000333	telomerase catalytic core complex	cellular_component	BraA10g022950.3C	0.82518
GO:0042803	protein homodimerization activity	molecular_function	BraA08g022880.3C	0.82518
GO:0004527	exonuclease activity	molecular_function	BraA03g006710.3C	0.82518
GO:0097602	cullin family protein binding	molecular_function	BraA06g000340.3C	0.82518
GO:0009523	photosystem II	cellular_component	BraA01g004080.3C	0.82518
GO:0001076	transcription factor activity, RNA polymerase II transcription factor binding	molecular_function	BraA03g041270.3C	0.82518
GO:0008219	cell death	biological_process	BraA01g025910.3C	0.82518
GO:0004644	phosphoribosylglycinamide formyltransferase activity	molecular_function	BraA09g033780.3C	0.82518
GO:0008942	nitrite reductase [NAD(P)H] activity	molecular_function	BraA07g036050.3C	0.82518
GO:0005324	long-chain fatty acid transporter activity	molecular_function	BraA08g022120.3C	0.82518
GO:0000111	nucleotide-excision repair factor 2 complex	cellular_component	BraA02g006590.3C	0.82518
GO:0004714	transmembrane receptor protein tyrosine kinase activity	molecular_function	BraA08g002170.3C	0.82518
GO:0016192	vesicle-mediated transport	biological_process	BraA03g004680.3C	0.82518
GO:0008408	3'-5' exonuclease activity	molecular_function	BraA09g018760.3C	0.82518
GO:0004058	aromatic-L-amino-acid decarboxylase activity	molecular_function	BraA01g008840.3C	0.82518
GO:0008097	5S rRNA binding	molecular_function	BraA09g059590.3C	0.82518
GO:0002752	cell surface pattern recognition receptor signaling pathway	biological_process	BraA05g025510.3C	0.82518
GO:0042300	beta-amyrin synthase activity	molecular_function	BraA07g042000.3C	0.82518
GO:0034975	protein folding in endoplasmic reticulum	biological_process	BraA01g013100.3C	0.82518
GO:0006729	tetrahydrobiopterin biosynthetic process	biological_process	BraA03g015620.3C	0.82518
GO:0004123	cystathionine gamma-lyase activity	molecular_function	BraA09g004810.3C	0.82518
GO:0008922	long-chain fatty acid [acyl-carrier-protein] ligase activity	molecular_function	BraA04g008050.3C	0.82518
GO:0016779	nucleotidyltransferase activity	molecular_function	BraA03g025640.3C	0.82518
GO:0008831	dTDP-4-dehydrorhamnose reductase activity	molecular_function	BraA02g026510.3C	0.82518
GO:0003998	acylphosphatase activity	molecular_function	BraA03g000790.3C	0.82518
GO:0080167	response to karrikin	biological_process	BraA09g001390.3C	0.82518
GO:0008565	protein transporter activity	molecular_function	BraA06g034500.3C	0.82518
GO:0004458	D-lactate dehydrogenase (cytochrome) activity	molecular_function	BraA10g029270.3C	0.82518
GO:0000169	activation of MAPK activity involved in osmosensory signaling pathway	biological_process	BraA06g020840.3C	0.82518
GO:0016301	kinase activity	molecular_function	BraA09g038940.3C	0.82518
GO:0000394	RNA splicing, via endonucleolytic cleavage and ligation	biological_process	BraA07g038110.3C	0.82518
GO:0006287	base-excision repair, gap-filling	biological_process	BraA06g027430.3C	0.82518
GO:0004059	aralkylamine N-acetyltransferase activity	molecular_function	BraA05g023770.3C	0.82518
GO:0008195	phosphatidate phosphatase activity	molecular_function	BraA07g009840.3C	0.82518
GO:0010857	calcium-dependent protein kinase activity	molecular_function	BraA03g049820.3C	0.82518
GO:0000506	glycosylphosphatidylinositol-N-acetylglucosaminyltransferase (GPI-GnT) complex	cellular_component	BraA05g010120.3C	0.82518
GO:0004709	MAP kinase kinase kinase activity	molecular_function	BraA07g037700.3C	0.82518
GO:0003856	3-dehydroquinate synthase activity	molecular_function	BraA06g036830.3C	0.82518
GO:0006744	ubiquinone biosynthetic process	biological_process	BraA06g012860.3C	0.82518
GO:0006405	RNA export from nucleus	biological_process	BraA06g044740.3C	0.82518
GO:0004662	CAAX-protein geranylgeranyltransferase activity	molecular_function	BraA05g006460.3C	0.82518
GO:0004164	diphthine synthase activity	molecular_function	BraA01g006140.3C	0.82518
GO:0000964	mitochondrial RNA 5'-end processing	biological_process	BraA02g044720.3C	0.82518
GO:0003975	UDP-N-acetylglucosamine-dolichyl-phosphate N-acetylglucosaminephosphotransferase activity	molecular_function	BraA05g002240.3C	0.82518
GO:0000706	meiotic DNA double-strand break processing	biological_process	BraA01g038310.3C	0.82518
GO:0000940	condensed chromosome outer kinetochore	cellular_component	BraA09g053430.3C	0.82518
GO:0009941	chloroplast envelope	cellular_component	BraA01g038820.3C	0.82518
GO:0000224	peptide-N4-(N-acetyl-beta-glucosaminyl)asparagine amidase activity	molecular_function	BraA06g034660.3C	0.82518
GO:0000025	maltose catabolic process	biological_process	BraA09g008470.3C	0.82518
GO:0030288	outer membrane-bounded periplasmic space	cellular_component	BraA09g048280.3C	0.82518
GO:0003919	FMN adenylyltransferase activity	molecular_function	BraA03g003480.3C	0.82518
GO:0004112	cyclic-nucleotide phosphodiesterase activity	molecular_function	BraA08g013200.3C	0.82518
GO:0004540	ribonuclease activity	molecular_function	BraA07g007500.3C	0.82518
GO:0008805	carbon-monoxide oxygenase activity	molecular_function	BraA08g025600.3C	0.82518
GO:0003848	2-amino-4-hydroxy-6-hydroxymethyldihydropteridine diphosphokinase activity	molecular_function	BraA01g007680.3C	0.82518
GO:0005983	starch catabolic process	biological_process	BraA03g030480.3C	0.82518
GO:0002100	tRNA wobble adenosine to inosine editing	biological_process	BraA02g018620.3C	0.82518
GO:0006413	translational initiation	biological_process	BraA06g012650.3C	0.82518
GO:0004813	alanine-tRNA ligase activity	molecular_function	BraA05g030610.3C	0.82518
GO:0009517	PSII associated light-harvesting complex II	cellular_component	BraA02g017410.3C	0.82518
GO:0048193	Golgi vesicle transport	biological_process	BraA08g018160.3C	0.82518
GO:0004851	uroporphyrin-III C-methyltransferase activity	molecular_function	BraA04g013440.3C	0.82518
GO:0000408	EKC/KEOPS complex	cellular_component	BraA05g004990.3C	0.82518
GO:0004848	ureidoglycolate hydrolase activity	molecular_function	BraA04g025430.3C	0.82518
GO:0006281	DNA repair	biological_process	BraA05g034370.3C	0.82518
GO:0004334	fumarylacetoacetase activity	molecular_function	BraA06g009540.3C	0.82518
GO:0004412	homoserine dehydrogenase activity	molecular_function	BraA10g019620.3C	0.82518
GO:0004563	beta-N-acetylhexosaminidase activity	molecular_function	BraA07g031690.3C	0.82518
GO:0009543	chloroplast thylakoid lumen	cellular_component	BraA06g021830.3C	0.82518
GO:0015098	molybdate ion transmembrane transporter activity	molecular_function	BraA09g054420.3C	0.82518
GO:0010200	response to chitin	biological_process	BraA01g016870.3C	0.82518
GO:0004746	riboflavin synthase activity	molecular_function	BraA07g000150.3C	0.82518
GO:0007035	vacuolar acidification	biological_process	BraA05g001260.3C	0.82518
GO:0003941	L-serine ammonia-lyase activity	molecular_function	BraA02g028360.3C	0.82518
GO:0000731	DNA synthesis involved in DNA repair	biological_process	BraA06g006720.3C	0.82518
GO:0006811	ion transport	biological_process	BraA09g045390.3C	0.82518
GO:0005261	cation channel activity	molecular_function	BraA05g000100.3C	0.82518
GO:0000480	endonucleolytic cleavage in 5'-ETS of tricistronic rRNA transcript (SSU-rRNA, 5.8S rRNA, LSU-rRNA)	biological_process	BraA03g056580.3C	0.82518
GO:0004121	cystathionine beta-lyase activity	molecular_function	BraA04g003510.3C	0.82518
GO:0009414	response to water deprivation	biological_process	BraA09g034930.3C	0.82518
GO:0004846	urate oxidase activity	molecular_function	BraA07g009600.3C	0.82518
GO:0042800	histone methyltransferase activity (H3-K4 specific)	molecular_function	BraA04g019640.3C	0.82518
GO:0006506	GPI anchor biosynthetic process	biological_process	BraA10g022720.3C	0.82518
GO:0000738	DNA catabolic process, exonucleolytic	biological_process	BraA06g033630.3C	0.82518
GO:0000428	DNA-directed RNA polymerase complex	cellular_component	BraA06g023050.3C	0.82518
GO:0004026	alcohol O-acetyltransferase activity	molecular_function	BraA10g023040.3C	0.82518
GO:0051131	chaperone-mediated protein complex assembly	biological_process	BraA09g060860.3C	0.82518
GO:0001732	formation of cytoplasmic translation initiation complex	biological_process	BraA09g002790.3C	0.82518
GO:0006875	cellular metal ion homeostasis	biological_process	BraA06g012000.3C	0.82518
GO:0006888	ER to Golgi vesicle-mediated transport	biological_process	BraA09g019520.3C	0.82518
GO:0004407	histone deacetylase activity	molecular_function	BraA03g010380.3C;BraA04g019970.3C;BraA06g026700.3C;BraA07g013140.3C;BraA09g007670.3C;BraA03g038370.3C;BraA06g024220.3C;BraA03g038380.3C;BraA06g021310.3C;BraA05g028840.3C;BraA02g009920.3C;BraA02g009900.3C;BraA03g065000.3C;BraA10g018810.3C;BraA06g018680.3C;BraA02g009940.3C;BraA01g034370.3C	0.826577
GO:0003700	transcription factor activity, sequence-specific DNA binding	molecular_function	BraA02g005890.3C;BraA09g009170.3C;BraA10g021470.3C;BraA09g047100.3C;BraA03g053220.3C;BraA04g001630.3C;BraA04g014060.3C;BraA09g036670.3C;BraA02g038810.3C;BraA09g021790.3C;BraA01g019380.3C;BraA03g000040.3C;BraA05g008730.3C;BraA03g054520.3C;BraA07g009910.3C;BraA07g005170.3C;BraA04g025520.3C;BraA08g018080.3C;BraA06g012090.3C;BraA08g001220.3C;BraA01g008990.3C;BraA02g042630.3C;BraA08g000570.3C;BraA03g0…	0.82974
GO:0000462	maturation of SSU-rRNA from tricistronic rRNA transcript (SSU-rRNA, 5.8S rRNA, LSU-rRNA)	biological_process	BraA03g009570.3C;BraA05g010550.3C;BraA04g030160.3C;BraA09g038880.3C;BraA09g010820.3C;BraA07g003770.3C;BraA02g008820.3C;BraA09g038890.3C;BraA03g056320.3C;BraA03g032750.3C;BraA08g029160.3C;BraA06g020110.3C;BraA05g038910.3C	0.837734
GO:0003677	DNA binding	molecular_function	BraA10g021700.3C;BraA05g038850.3C;BraA05g042650.3C;BraA10g000900.3C;BraA07g028240.3C;BraA06g028200.3C;BraA10g016250.3C;BraA03g015050.3C;BraA03g015280.3C;BraA09g064170.3C;BraA09g043960.3C;BraA08g025570.3C;BraA09g024740.3C;BraA09g062360.3C;BraA06g030710.3C;BraA05g018580.3C;BraA05g004720.3C;BraA02g011360.3C;BraA07g032540.3C;BraA02g040370.3C;BraA02g002860.3C;BraA08g019870.3C;BraA01g043200.3C;BraA06g0…	0.847101
GO:0000788	nuclear nucleosome	cellular_component	BraA10g018700.3C;BraA06g020660.3C;BraA04g020550.3C;BraA07g019050.3C;BraA10g017740.3C;BraA03g011050.3C	0.849515
GO:0004616	phosphogluconate dehydrogenase (decarboxylating) activity	molecular_function	BraA06g013370.3C;BraA05g041200.3C;BraA02g020290.3C;BraA01g030590.3C;BraA09g013650.3C;BraA04g014140.3C	0.849515
GO:0004108	citrate (Si)-synthase activity	molecular_function	BraA05g003150.3C;BraA04g002580.3C;BraA09g048990.3C;BraA04g031200.3C;BraA04g002070.3C;BraA07g023590.3C	0.849515
GO:0004362	glutathione-disulfide reductase activity	molecular_function	BraA07g009030.3C;BraA08g018840.3C;BraA09g045490.3C;BraA03g054660.3C;BraA04g005290.3C;BraA01g008770.3C	0.849515
GO:0004367	glycerol-3-phosphate dehydrogenase [NAD+] activity	molecular_function	BraA01g037760.3C;BraA09g032310.3C;BraA04g013220.3C;BraA05g038020.3C;BraA04g028810.3C;BraA03g021990.3C	0.849515
GO:0006651	diacylglycerol biosynthetic process	biological_process	BraA03g045330.3C;BraA09g009600.3C;BraA02g045740.3C;BraA07g017550.3C;BraA05g009700.3C;BraA03g045320.3C	0.849515
GO:0004478	methionine adenosyltransferase activity	molecular_function	BraA03g029510.3C;BraA04g026170.3C;BraA05g000750.3C;BraA09g002300.3C;BraA01g035280.3C;BraA05g008480.3C	0.849515
GO:0000808	origin recognition complex	cellular_component	BraA10g002080.3C;BraA03g062190.3C;BraA10g023100.3C;BraA09g026180.3C;BraA07g022680.3C;BraA09g038710.3C	0.849515
GO:0003994	aconitate hydratase activity	molecular_function	BraA06g008190.3C;BraA07g007160.3C;BraA03g042060.3C;BraA01g002710.3C;BraA10g013000.3C;BraA08g020550.3C	0.849515
GO:0006979	response to oxidative stress	biological_process	BraA03g049750.3C;BraA02g026160.3C;BraA07g043150.3C;BraA09g029440.3C;BraA07g040850.3C;BraA06g001210.3C	0.849515
GO:0004373	glycogen (starch) synthase activity	molecular_function	BraA01g044620.3C;BraA06g008300.3C;BraA05g022890.3C;BraA08g031440.3C;BraA05g040820.3C;BraA08g012850.3C	0.849515
GO:0000015	phosphopyruvate hydratase complex	cellular_component	BraA10g005900.3C;BraA03g019060.3C;BraA05g014620.3C;BraA09g044000.3C;BraA10g005890.3C;BraA07g038010.3C	0.849515
GO:0003978	UDP-glucose 4-epimerase activity	molecular_function	BraA09g027620.3C;BraA03g051560.3C;BraA06g009010.3C;BraA08g030770.3C;BraA03g062300.3C;BraA09g012980.3C	0.849515
GO:0004812	aminoacyl-tRNA ligase activity	molecular_function	BraA04g004650.3C;BraA10g007170.3C;BraA09g051640.3C;BraA04g019030.3C;BraA08g013320.3C;BraA07g002060.3C;BraA05g017710.3C;BraA02g025600.3C;BraA07g025000.3C;BraA07g023390.3C;BraA04g011770.3C;BraA03g031750.3C;BraA09g046220.3C;BraA03g014830.3C;BraA01g042880.3C;BraA06g002540.3C	0.853422
GO:0000323	lytic vacuole	cellular_component	BraA10g014980.3C;BraA01g005100.3C;BraA02g012510.3C	0.856577
GO:0003844	1,4-alpha-glucan branching enzyme activity	molecular_function	BraA10g032560.3C;BraA04g025900.3C;BraA05g026800.3C	0.856577
GO:0004657	proline dehydrogenase activity	molecular_function	BraA06g036100.3C;BraA04g011230.3C;BraA09g003980.3C	0.856577
GO:0005504	fatty acid binding	molecular_function	BraA04g019280.3C;BraA06g001290.3C;BraA09g052430.3C	0.856577
GO:0004793	threonine aldolase activity	molecular_function	BraA05g042620.3C;BraA08g033070.3C;BraA09g062680.3C	0.856577
GO:0004321	fatty-acyl-CoA synthase activity	molecular_function	BraA09g060120.3C;BraA09g025000.3C;BraA02g044000.3C	0.856577
GO:0000922	spindle pole	cellular_component	BraA06g026080.3C;BraA06g026050.3C;BraA02g043740.3C	0.856577
GO:0005758	mitochondrial intermembrane space	cellular_component	BraA10g021320.3C;BraA06g001600.3C;BraA03g008870.3C	0.856577
GO:0007275	multicellular organism development	biological_process	BraA08g006810.3C;BraA04g028490.3C;BraA01g017770.3C	0.856577
GO:0000453	enzyme-directed rRNA 2'-O-methylation	biological_process	BraA08g019970.3C;BraA10g006140.3C;BraA03g052730.3C	0.856577
GO:0004474	malate synthase activity	molecular_function	BraA02g001120.3C;BraA03g010830.3C;BraA02g028040.3C	0.856577
GO:0000271	polysaccharide biosynthetic process	biological_process	BraA02g006730.3C;BraA04g003460.3C;BraA10g022900.3C	0.856577
GO:0000312	plastid small ribosomal subunit	cellular_component	BraA09g023110.3C;BraA09g023100.3C;BraA07g027980.3C	0.856577
GO:0009793	embryo development ending in seed dormancy	biological_process	BraA08g006570.3C;BraA09g042000.3C;BraA02g031180.3C	0.856577
GO:0004776	succinate-CoA ligase (GDP-forming) activity	molecular_function	BraA03g003440.3C;BraA03g043560.3C;BraA10g030620.3C	0.856577
GO:0000812	Swr1 complex	cellular_component	BraA03g011870.3C;BraA05g025170.3C;BraA09g036970.3C	0.856577
GO:0000904	cell morphogenesis involved in differentiation	biological_process	BraA09g061020.3C;BraA08g031240.3C;BraA09g015850.3C	0.856577
GO:0000578	embryonic axis specification	biological_process	BraA07g017890.3C;BraA02g021430.3C;BraA07g037250.3C	0.856577
GO:0004753	saccharopine dehydrogenase activity	molecular_function	BraA03g057740.3C;BraA09g034330.3C;BraA01g004800.3C	0.856577
GO:0004365	glyceraldehyde-3-phosphate dehydrogenase (NAD+) (phosphorylating) activity	molecular_function	BraA06g012240.3C;BraA02g025340.3C;BraA08g007230.3C	0.856577
GO:0009648	photoperiodism	biological_process	BraA09g020500.3C;BraA01g023330.3C;BraA09g042660.3C	0.856577
GO:0004615	phosphomannomutase activity	molecular_function	BraA05g005470.3C;BraA02g007100.3C;BraA03g023960.3C	0.856577
GO:0006468	protein phosphorylation	biological_process	BraA05g026230.3C;BraA01g032740.3C;BraA01g039100.3C	0.856577
GO:0000387	spliceosomal snRNP assembly	biological_process	BraA10g023000.3C;BraA02g027420.3C;BraA06g025840.3C	0.856577
GO:0005459	UDP-galactose transmembrane transporter activity	molecular_function	BraA09g059420.3C;BraA08g017410.3C;BraA06g010490.3C	0.856577
GO:0005052	peroxisome matrix targeting signal-1 binding	molecular_function	BraA02g012910.3C;BraA03g013040.3C;BraA10g014170.3C	0.856577
GO:0000447	endonucleolytic cleavage in ITS1 to separate SSU-rRNA from 5.8S rRNA and LSU-rRNA from tricistronic rRNA transcript (SSU-rRNA, 5.8S rRNA, LSU-rRNA)	biological_process	BraA09g005140.3C;BraA02g040830.3C;BraA07g021460.3C	0.856577
GO:0004349	glutamate 5-kinase activity	molecular_function	BraA05g006260.3C;BraA03g021080.3C;BraA04g004460.3C	0.856577
GO:0004679	AMP-activated protein kinase activity	molecular_function	BraA03g046820.3C;BraA08g011810.3C;BraA10g019460.3C	0.856577
GO:0004795	threonine synthase activity	molecular_function	BraA08g018420.3C;BraA09g011810.3C;BraA01g007870.3C	0.856577
GO:0003935	GTP cyclohydrolase II activity	molecular_function	BraA09g054860.3C;BraA09g008210.3C;BraA02g010750.3C	0.856577
GO:0004001	adenosine kinase activity	molecular_function	BraA10g032700.3C;BraA03g000820.3C;BraA01g040550.3C	0.856577
GO:0003959	NADPH dehydrogenase activity	molecular_function	BraA02g023600.3C;BraA09g057440.3C;BraA08g027980.3C;BraA03g042180.3C;BraA10g022970.3C;BraA06g022770.3C;BraA08g035300.3C;BraA06g022790.3C;BraA07g017700.3C	0.856886
GO:0004017	adenylate kinase activity	molecular_function	BraA09g004010.3C;BraA03g030260.3C;BraA08g009380.3C;BraA05g006680.3C;BraA06g026920.3C;BraA06g035970.3C;BraA10g018140.3C;BraA09g007800.3C;BraA03g026300.3C	0.856886
GO:0009506	plasmodesma	cellular_component	BraA09g005600.3C;BraA10g025740.3C;BraA09g005590.3C;BraA01g042760.3C;BraA02g041220.3C;BraA06g033270.3C;BraA03g005480.3C;BraA06g033290.3C;BraA02g041230.3C	0.856886
GO:0004312	fatty acid synthase activity	molecular_function	BraA06g041960.3C;BraA09g059570.3C;BraA09g021760.3C;BraA08g003630.3C;BraA02g032750.3C;BraA03g020440.3C;BraA07g038670.3C;BraA09g059560.3C;BraA03g041760.3C	0.856886
GO:0004222	metalloendopeptidase activity	molecular_function	BraA07g032930.3C;BraA06g037850.3C;BraA06g044150.3C;BraA01g044350.3C;BraA07g030070.3C;BraA04g019050.3C;BraA05g015230.3C;BraA01g033860.3C;BraA08g002390.3C;BraA09g063650.3C;BraA09g019210.3C;BraA01g019940.3C;BraA05g002460.3C;BraA07g031190.3C;BraA04g023290.3C;BraA05g030680.3C;BraA01g043680.3C;BraA05g017930.3C;BraA02g040260.3C;BraA06g026010.3C;BraA10g010340.3C;BraA01g011900.3C;BraA10g003730.3C;BraA10g0…	0.864121
GO:0002020	protease binding	molecular_function	BraA05g037150.3C;BraA03g043350.3C;BraA08g008860.3C;BraA06g004580.3C;BraA09g038510.3C;BraA03g033950.3C;BraA05g037140.3C;BraA02g004080.3C;BraA02g020760.3C;BraA01g040820.3C;BraA01g027130.3C;BraA09g040510.3C	0.867355
GO:0004356	glutamate-ammonia ligase activity	molecular_function	BraA08g008200.3C;BraA10g023190.3C;BraA08g009150.3C;BraA01g034850.3C;BraA02g016970.3C;BraA06g004530.3C;BraA05g020160.3C;BraA10g021840.3C;BraA02g006550.3C;BraA05g029760.3C;BraA09g037120.3C;BraA09g044140.3C	0.867355
GO:0006508	proteolysis	biological_process	BraA01g023300.3C;BraA03g043200.3C;BraA01g037990.3C;BraA01g004500.3C;BraA03g045540.3C;BraA07g020560.3C;BraA09g026090.3C;BraA01g021790.3C;BraA07g018130.3C;BraA01g038150.3C;BraA09g042570.3C;BraA07g000130.3C;BraA03g050240.3C;BraA06g025040.3C;BraA01g023770.3C;BraA09g041330.3C;BraA06g017730.3C;BraA08g024250.3C;BraA10g012260.3C	0.867466
GO:0003841	1-acylglycerol-3-phosphate O-acyltransferase activity	molecular_function	BraA02g022570.3C;BraA05g028420.3C;BraA05g018430.3C;BraA01g014910.3C;BraA07g027970.3C;BraA04g003170.3C;BraA07g022970.3C;BraA09g048210.3C	0.890015
GO:0000790	nuclear chromatin	cellular_component	BraA01g032950.3C;BraA05g027290.3C;BraA07g006810.3C;BraA03g026840.3C;BraA05g018590.3C;BraA10g014620.3C;BraA02g000540.3C;BraA05g026520.3C	0.890015
GO:0000338	protein deneddylation	biological_process	BraA03g053120.3C;BraA01g020700.3C;BraA01g020690.3C;BraA07g014420.3C;BraA01g017120.3C;BraA09g050700.3C;BraA09g040180.3C;BraA03g046700.3C	0.890015
GO:0000285	1-phosphatidylinositol-3-phosphate 5-kinase activity	molecular_function	BraA06g021440.3C;BraA06g021450.3C;BraA01g037390.3C;BraA10g004850.3C;BraA07g035680.3C;BraA03g036360.3C;BraA02g020170.3C;BraA01g004730.3C	0.890015
GO:0004792	thiosulfate sulfurtransferase activity	molecular_function	BraA07g026330.3C;BraA02g025170.3C;BraA06g012390.3C;BraA09g009810.3C;BraA07g042210.3C	0.892441
GO:0004617	phosphoglycerate dehydrogenase activity	molecular_function	BraA03g058690.3C;BraA01g004070.3C;BraA10g024400.3C;BraA03g038870.3C;BraA02g005670.3C	0.892441
GO:0000822	inositol hexakisphosphate binding	molecular_function	BraA09g060380.3C;BraA08g030740.3C;BraA07g019780.3C;BraA09g060560.3C;BraA08g030750.3C	0.892441
GO:0004014	adenosylmethionine decarboxylase activity	molecular_function	BraA03g030940.3C;BraA01g034920.3C;BraA05g017090.3C;BraA02g007900.3C;BraA03g008880.3C;BraA10g021310.3C;BraA03g007250.3C;BraA10g023660.3C;BraA01g044340.3C;BraA05g017080.3C;BraA10g023650.3C	0.894276
GO:0005375	copper ion transmembrane transporter activity	molecular_function	BraA03g009740.3C;BraA05g007670.3C;BraA02g010970.3C;BraA02g009040.3C;BraA02g011140.3C;BraA06g042780.3C;BraA06g020010.3C;BraA10g017120.3C;BraA10g017140.3C;BraA10g019980.3C;BraA02g011150.3C	0.894276
GO:0001731	formation of translation preinitiation complex	biological_process	BraA08g031900.3C;BraA03g027600.3C;BraA02g016220.3C;BraA09g047930.3C;BraA08g016690.3C;BraA02g031200.3C;BraA03g021160.3C;BraA10g002660.3C;BraA05g006090.3C;BraA08g012040.3C;BraA09g020430.3C;BraA02g028410.3C;BraA03g050990.3C;BraA04g010270.3C;BraA06g007680.3C;BraA09g065030.3C;BraA04g014680.3C;BraA09g048770.3C;BraA06g043180.3C;BraA09g027030.3C;BraA09g046880.3C	0.898263
GO:0004372	glycine hydroxymethyltransferase activity	molecular_function	BraA01g005570.3C;BraA04g008160.3C;BraA07g035910.3C;BraA08g027010.3C;BraA07g029630.3C;BraA09g040930.3C;BraA08g006110.3C;BraA08g005730.3C;BraA08g021770.3C;BraA08g007700.3C	0.918198
GO:0003747	translation release factor activity	molecular_function	BraA06g008870.3C;BraA09g052200.3C;BraA09g031590.3C;BraA03g062070.3C;BraA06g035940.3C;BraA01g018430.3C;BraA05g015130.3C;BraA04g000500.3C;BraA08g030700.3C;BraA09g002900.3C	0.918198
GO:0000275	mitochondrial proton-transporting ATP synthase complex, catalytic core F(1)	cellular_component	BraA02g002830.3C;BraA06g041370.3C;BraA02g033480.3C;BraA02g004900.3C;BraA02g002820.3C;BraA05g018210.3C;BraA03g005750.3C;BraA03g003800.3C;BraA08g002500.3C;BraA09g022480.3C	0.918198
GO:0000024	maltose biosynthetic process	biological_process	BraA03g047370.3C;BraA01g019450.3C	0.919007
GO:0004340	glucokinase activity	molecular_function	BraA07g000960.3C;BraA09g012100.3C	0.919007
GO:0003838	sterol 24-C-methyltransferase activity	molecular_function	BraA07g039560.3C;BraA03g005870.3C	0.919007
GO:0004150	dihydroneopterin aldolase activity	molecular_function	BraA05g035180.3C;BraA05g035170.3C	0.919007
GO:0000124	SAGA complex	cellular_component	BraA09g001000.3C;BraA06g037860.3C	0.919007
GO:0005654	nucleoplasm	cellular_component	BraA07g002550.3C;BraA09g053650.3C	0.919007
GO:0005353	fructose transmembrane transporter activity	molecular_function	BraA01g035840.3C;BraA03g046580.3C	0.919007
GO:0000811	GINS complex	cellular_component	BraA04g028150.3C;BraA02g026100.3C	0.919007
GO:0004633	phosphopantothenoylcysteine decarboxylase activity	molecular_function	BraA03g038240.3C;BraA05g029500.3C	0.919007
GO:0004418	hydroxymethylbilane synthase activity	molecular_function	BraA10g030600.3C;BraA03g003420.3C	0.919007
GO:0004075	biotin carboxylase activity	molecular_function	BraA03g058570.3C;BraA09g065370.3C	0.919007
GO:0000469	cleavage involved in rRNA processing	biological_process	BraA09g060670.3C;BraA04g013840.3C	0.919007
GO:0005080	protein kinase C binding	molecular_function	BraA07g022440.3C;BraA04g003980.3C	0.919007
GO:0004044	amidophosphoribosyltransferase activity	molecular_function	BraA01g000160.3C;BraA07g004500.3C	0.919007
GO:0004314	[acyl-carrier-protein] S-malonyltransferase activity	molecular_function	BraA03g016080.3C;BraA05g014050.3C	0.919007
GO:0009058	biosynthetic process	biological_process	BraA06g040680.3C;BraA01g019970.3C	0.919007
GO:0004455	ketol-acid reductoisomerase activity	molecular_function	BraA04g002670.3C;BraA09g048840.3C	0.919007
GO:0006814	sodium ion transport	biological_process	BraA02g044530.3C;BraA03g038860.3C	0.919007
GO:0000248	C-5 sterol desaturase activity	molecular_function	BraA01g044080.3C;BraA03g031030.3C	0.919007
GO:0005457	GDP-fucose transmembrane transporter activity	molecular_function	BraA07g040910.3C;BraA07g040280.3C	0.919007
GO:0000030	mannosyltransferase activity	molecular_function	BraA02g005680.3C;BraA06g012540.3C	0.919007
GO:0000778	condensed nuclear chromosome kinetochore	cellular_component	BraA07g005070.3C;BraA02g037270.3C	0.919007
GO:0000170	sphingosine hydroxylase activity	molecular_function	BraA06g010400.3C;BraA07g034560.3C	0.919007
GO:0008514	organic anion transmembrane transporter activity	molecular_function	BraA10g032160.3C;BraA01g040430.3C	0.919007
GO:0019788	NEDD8 transferase activity	molecular_function	BraA03g009690.3C;BraA10g020070.3C	0.919007
GO:0004347	glucose-6-phosphate isomerase activity	molecular_function	BraA01g015390.3C;BraA09g019380.3C	0.919007
GO:0000780	condensed nuclear chromosome, centromeric region	cellular_component	BraA08g016850.3C;BraA02g007120.3C	0.919007
GO:0016614	oxidoreductase activity, acting on CH-OH group of donors	molecular_function	BraA09g046810.3C;BraA03g015240.3C	0.919007
GO:0006679	glucosylceramide biosynthetic process	biological_process	BraA07g000940.3C;BraA09g056390.3C	0.919007
GO:0008146	sulfotransferase activity	molecular_function	BraA03g045180.3C;BraA03g057640.3C	0.919007
GO:0003678	DNA helicase activity	molecular_function	BraA03g052270.3C;BraA06g029430.3C	0.919007
GO:0004316	3-oxoacyl-[acyl-carrier-protein] reductase (NADPH) activity	molecular_function	BraA08g025130.3C;BraA07g012390.3C	0.919007
GO:0000786	nucleosome	cellular_component	BraA07g021790.3C;BraA09g019360.3C;BraA05g017570.3C;BraA02g034910.3C;BraA06g005900.3C;BraA02g010590.3C;BraA09g008610.3C;BraA06g005090.3C;BraA03g020470.3C;BraA01g017960.3C;BraA03g011080.3C;BraA02g039530.3C;BraA04g005340.3C;BraA02g045160.3C;BraA05g020130.3C;BraA06g020670.3C;BraA06g013280.3C;BraA09g009400.3C;BraA06g001850.3C;BraA02g040810.3C;BraA03g038250.3C;BraA04g020580.3C;BraA09g023250.3C;BraA06g0…	0.919998
GO:0000815	ESCRT III complex	cellular_component	BraA06g042980.3C;BraA10g018630.3C;BraA01g011430.3C;BraA09g012090.3C;BraA08g035090.3C;BraA03g054930.3C;BraA03g042160.3C;BraA07g000990.3C;BraA01g008420.3C;BraA06g027320.3C;BraA09g020620.3C;BraA10g002520.3C;BraA03g043290.3C	0.920844
GO:0005615	extracellular space	cellular_component	BraA07g040450.3C;BraA01g009410.3C;BraA02g019280.3C;BraA03g047800.3C;BraA07g030310.3C;BraA02g021530.3C;BraA09g064630.3C;BraA02g036670.3C;BraA02g037620.3C;BraA06g037700.3C;BraA09g037890.3C;BraA02g009990.3C;BraA07g027160.3C;BraA07g012810.3C;BraA02g038170.3C;BraA07g028880.3C	0.92501
GO:0004751	ribose-5-phosphate isomerase activity	molecular_function	BraA06g040640.3C;BraA05g040340.3C;BraA02g020240.3C;BraA01g042920.3C	0.929596
GO:0005802	trans-Golgi network	cellular_component	BraA02g018640.3C;BraA07g033810.3C;BraA07g030580.3C;BraA05g007650.3C	0.929596
GO:0005249	voltage-gated potassium channel activity	molecular_function	BraA03g013650.3C;BraA01g034820.3C;BraA07g018660.3C;BraA04g013910.3C	0.929596
GO:0003878	ATP citrate synthase activity	molecular_function	BraA08g031940.3C;BraA09g016910.3C;BraA09g004530.3C;BraA02g040200.3C	0.929596
GO:0004475	mannose-1-phosphate guanylyltransferase activity	molecular_function	BraA03g055870.3C;BraA03g021070.3C;BraA05g006280.3C;BraA03g027370.3C	0.929596
GO:0002679	respiratory burst involved in defense response	biological_process	BraA04g025550.3C;BraA04g006930.3C;BraA09g014740.3C;BraA09g043610.3C;BraA03g018810.3C;BraA03g046070.3C;BraA03g034990.3C;BraA01g039350.3C;BraA10g010310.3C	0.938904
GO:0000418	DNA-directed RNA polymerase IV complex	cellular_component	BraA05g016750.3C;BraA08g011780.3C;BraA03g040340.3C;BraA03g021210.3C;BraA08g001400.3C;BraA03g065490.3C;BraA06g008120.3C;BraA06g001200.3C;BraA09g003420.3C;BraA01g020540.3C;BraA09g012850.3C;BraA05g029430.3C;BraA07g005420.3C;BraA09g049480.3C;BraA03g062260.3C	0.94017
GO:0004462	lactoylglutathione lyase activity	molecular_function	BraA06g005360.3C;BraA07g032620.3C;BraA02g026120.3C;BraA06g011430.3C;BraA07g018790.3C;BraA05g012260.3C	0.943978
GO:0008375	acetylglucosaminyltransferase activity	molecular_function	BraA03g028610.3C;BraA07g033530.3C;BraA02g018290.3C;BraA09g043240.3C;BraA07g033520.3C;BraA03g057230.3C	0.943978
GO:0003830	beta-1,4-mannosylglycoprotein 4-beta-N-acetylglucosaminyltransferase activity	molecular_function	BraA03g006330.3C;BraA09g009980.3C;BraA07g031080.3C;BraA10g024570.3C;BraA06g008720.3C;BraA06g037520.3C	0.943978
GO:0005744	mitochondrial inner membrane presequence translocase complex	cellular_component	BraA01g020640.3C;BraA08g011710.3C;BraA07g019200.3C;BraA04g000520.3C;BraA08g011730.3C;BraA04g008930.3C	0.943978
GO:0004045	aminoacyl-tRNA hydrolase activity	molecular_function	BraA10g027250.3C;BraA10g023450.3C;BraA01g023920.3C;BraA03g004400.3C;BraA10g022930.3C;BraA03g007720.3C	0.943978
GO:0004869	cysteine-type endopeptidase inhibitor activity	molecular_function	BraA01g020080.3C;BraA03g021700.3C;BraA03g001950.3C;BraA08g011910.3C;BraA09g024350.3C;BraA06g041030.3C;BraA02g034110.3C;BraA10g002240.3C;BraA05g034530.3C;BraA01g042110.3C;BraA03g040490.3C;BraA08g011920.3C;BraA04g028950.3C;BraA09g024360.3C;BraA09g015320.3C;BraA01g020100.3C;BraA04g023050.3C;BraA01g020120.3C;BraA09g015330.3C;BraA05g039100.3C;BraA10g002270.3C	0.946198
GO:0000028	ribosomal small subunit assembly	biological_process	BraA03g001720.3C;BraA01g030190.3C;BraA08g029830.3C;BraA01g039280.3C;BraA09g004050.3C;BraA03g023910.3C;BraA02g039330.3C;BraA06g032890.3C;BraA07g036790.3C;BraA10g031650.3C;BraA03g002440.3C;BraA07g009280.3C;BraA04g026370.3C;BraA10g012590.3C;BraA09g050670.3C;BraA03g040890.3C;BraA09g064980.3C;BraA06g011520.3C;BraA04g017900.3C;BraA07g020550.3C;BraA03g035040.3C;BraA02g001480.3C;BraA10g002800.3C;BraA04g0…	0.949621
GO:0000156	phosphorelay response regulator activity	molecular_function	BraA06g034890.3C;BraA05g042450.3C;BraA07g031180.3C;BraA07g033390.3C;BraA06g007290.3C;BraA04g018620.3C;BraA10g032970.3C;BraA01g024740.3C;BraA04g003520.3C;BraA03g021580.3C;BraA08g028390.3C;BraA02g000630.3C;BraA03g057090.3C;BraA01g020760.3C;BraA07g033540.3C;BraA02g040060.3C;BraA02g002270.3C;BraA01g009590.3C;BraA06g018810.3C;BraA03g046670.3C;BraA09g006930.3C;BraA02g035050.3C;BraA09g006120.3C;BraA05g0…	0.953087
GO:0004161	dimethylallyltranstransferase activity	molecular_function	BraA01g037240.3C;BraA05g032530.3C;BraA06g040860.3C;BraA09g011510.3C;BraA01g037230.3C;BraA05g010470.3C;BraA04g017500.3C;BraA03g036510.3C;BraA03g035070.3C;BraA07g002120.3C;BraA02g034250.3C;BraA03g060290.3C;BraA01g002000.3C;BraA09g054090.3C	0.953291
GO:0004129	cytochrome-c oxidase activity	molecular_function	BraA05g031440.3C;BraA10g013950.3C;BraA03g012110.3C;BraA08g008730.3C;BraA05g031450.3C;BraA07g025110.3C;BraA08g026810.3C;BraA03g037030.3C;BraA03g037060.3C;BraA02g026060.3C;BraA01g018870.3C;BraA09g051790.3C;BraA01g036550.3C;BraA05g031420.3C	0.953291
GO:0005262	calcium channel activity	molecular_function	BraA03g060310.3C;BraA02g029850.3C;BraA09g009480.3C;BraA04g017480.3C;BraA09g054100.3C;BraA07g027920.3C;BraA09g011090.3C;BraA02g045670.3C;BraA01g026900.3C;BraA07g017300.3C;BraA03g060300.3C	0.953501
GO:0005739	mitochondrion	cellular_component	BraA10g025280.3C;BraA06g035740.3C;BraA09g015670.3C;BraA09g039670.3C;BraA06g019480.3C;BraA09g004640.3C;BraA10g026200.3C;BraA02g014160.3C;BraA08g009500.3C;BraA06g006340.3C;BraA03g018350.3C;BraA01g012930.3C;BraA09g014200.3C;BraA04g002360.3C;BraA03g013750.3C;BraA05g034190.3C;BraA02g005960.3C;BraA06g016510.3C;BraA09g000210.3C;BraA01g019350.3C;BraA06g038980.3C;BraA09g062690.3C;BraA06g007000.3C;BraA06g0…	0.956186
GO:0004568	chitinase activity	molecular_function	BraA02g026670.3C;BraA01g038860.3C;BraA05g034520.3C;BraA03g035320.3C;BraA09g019190.3C;BraA08g034170.3C;BraA09g002350.3C;BraA10g001120.3C	0.956274
GO:0004564	beta-fructofuranosidase activity	molecular_function	BraA08g015640.3C;BraA03g061860.3C;BraA07g036450.3C;BraA03g026930.3C;BraA10g018900.3C;BraA05g021880.3C;BraA08g007970.3C;BraA09g040380.3C	0.956274
GO:0022625	cytosolic large ribosomal subunit	cellular_component	BraA07g009700.3C;BraA03g040790.3C;BraA01g030620.3C	0.959613
GO:0004311	farnesyltranstransferase activity	molecular_function	BraA01g000080.3C;BraA01g021190.3C;BraA04g015180.3C	0.959613
GO:0004310	farnesyl-diphosphate farnesyltransferase activity	molecular_function	BraA01g003670.3C;BraA03g058950.3C;BraA01g003660.3C	0.959613
GO:0004797	thymidine kinase activity	molecular_function	BraA05g037910.3C;BraA03g043690.3C;BraA07g003840.3C	0.959613
GO:0006970	response to osmotic stress	biological_process	BraA05g025340.3C;BraA01g037270.3C;BraA09g009220.3C;BraA05g025360.3C;BraA03g036470.3C	0.963985
GO:0000291	nuclear-transcribed mRNA catabolic process, exonucleolytic	biological_process	BraA08g010790.3C;BraA09g019100.3C;BraA10g017030.3C;BraA10g012250.3C;BraA03g055950.3C	0.963985
GO:0004861	cyclin-dependent protein serine/threonine kinase inhibitor activity	molecular_function	BraA03g045190.3C;BraA09g004330.3C;BraA05g012780.3C;BraA09g041740.3C;BraA03g041370.3C	0.963985
GO:0000154	rRNA modification	biological_process	BraA07g017660.3C;BraA04g008120.3C;BraA05g000510.3C;BraA09g000250.3C;BraA06g000130.3C	0.963985
GO:0000413	protein peptidyl-prolyl isomerization	biological_process	BraA06g027800.3C;BraA08g012160.3C;BraA04g014670.3C;BraA08g022860.3C;BraA09g040400.3C;BraA09g010510.3C;BraA10g019280.3C;BraA09g066350.3C;BraA08g027650.3C;BraA05g015660.3C;BraA01g000630.3C;BraA09g051560.3C;BraA03g041510.3C;BraA01g003400.3C;BraA10g017180.3C;BraA10g016600.3C;BraA03g024420.3C;BraA02g009510.3C;BraA05g036590.3C;BraA07g028620.3C;BraA05g040590.3C;BraA02g022080.3C;BraA06g035490.3C;BraA09g0…	0.965732
GO:0000302	response to reactive oxygen species	biological_process	BraA09g002070.3C;BraA09g049630.3C;BraA03g050820.3C;BraA05g007700.3C;BraA03g009240.3C;BraA04g008800.3C;BraA01g022930.3C;BraA02g008430.3C;BraA02g044030.3C;BraA10g013650.3C;BraA10g025200.3C;BraA04g010550.3C;BraA03g000150.3C;BraA08g033370.3C;BraA08g028890.3C;BraA04g004140.3C;BraA03g019760.3C;BraA03g048540.3C;BraA09g001780.3C;BraA03g047300.3C;BraA01g009120.3C;BraA03g015710.3C;BraA01g003440.3C;BraA01g0…	0.968012
GO:0018708	thiol S-methyltransferase activity	molecular_function	BraA04g031380.3C	0.969442
GO:0008685	2-C-methyl-D-erythritol 2,4-cyclodiphosphate synthase activity	molecular_function	BraA09g014810.3C	0.969442
GO:0003826	alpha-ketoacid dehydrogenase activity	molecular_function	BraA01g041770.3C	0.969442
GO:0000455	enzyme-directed rRNA pseudouridine synthesis	biological_process	BraA03g045930.3C	0.969442
GO:0035556	intracellular signal transduction	biological_process	BraA03g022200.3C	0.969442
GO:0000171	ribonuclease MRP activity	molecular_function	BraA04g008000.3C	0.969442
GO:0009535	chloroplast thylakoid membrane	cellular_component	BraA02g016470.3C	0.969442
GO:0004788	thiamine diphosphokinase activity	molecular_function	BraA10g001530.3C	0.969442
GO:0008380	RNA splicing	biological_process	BraA10g000040.3C	0.969442
GO:0000900	translation repressor activity, nucleic acid binding	molecular_function	BraA09g054750.3C	0.969442
GO:0000012	single strand break repair	biological_process	BraA09g062940.3C	0.969442
GO:0004816	asparagine-tRNA ligase activity	molecular_function	BraA03g033250.3C	0.969442
GO:0004042	acetyl-CoA:L-glutamate N-acetyltransferase activity	molecular_function	BraA03g060930.3C	0.969442
GO:0000703	oxidized pyrimidine nucleobase lesion DNA N-glycosylase activity	molecular_function	BraA09g064260.3C	0.969442
GO:0004056	argininosuccinate lyase activity	molecular_function	BraA10g027150.3C	0.969442
GO:0005778	peroxisomal membrane	cellular_component	BraA09g010180.3C	0.969442
GO:0002131	wobble position cytosine ribose methylation	biological_process	BraA03g036120.3C	0.969442
GO:0004665	prephenate dehydrogenase (NADP+) activity	molecular_function	BraA09g058590.3C	0.969442
GO:0009641	shade avoidance	biological_process	BraA03g052350.3C	0.969442
GO:0046658	anchored component of plasma membrane	cellular_component	BraA09g052450.3C	0.969442
GO:0005982	starch metabolic process	biological_process	BraA03g008480.3C	0.969442
GO:0050285	sinapine esterase activity	molecular_function	BraA08g024160.3C	0.969442
GO:0004315	3-oxoacyl-[acyl-carrier-protein] synthase activity	molecular_function	BraA09g015720.3C	0.969442
GO:0004333	fumarate hydratase activity	molecular_function	BraA01g044230.3C	0.969442
GO:0007568	aging	biological_process	BraA02g012030.3C	0.969442
GO:0004592	pantoate-beta-alanine ligase activity	molecular_function	BraA02g039870.3C	0.969442
GO:0005344	oxygen transporter activity	molecular_function	BraA05g036230.3C	0.969442
GO:0004814	arginine-tRNA ligase activity	molecular_function	BraA08g019830.3C	0.969442
GO:0004648	O-phospho-L-serine:2-oxoglutarate aminotransferase activity	molecular_function	BraA08g020750.3C	0.969442
GO:0009611	response to wounding	biological_process	BraA02g014410.3C	0.969442
GO:0000121	glycerol-1-phosphatase activity	molecular_function	BraA03g052780.3C	0.969442
GO:0042802	identical protein binding	molecular_function	BraA02g019430.3C	0.969442
GO:0004419	hydroxymethylglutaryl-CoA lyase activity	molecular_function	BraA03g025350.3C	0.969442
GO:0003864	3-methyl-2-oxobutanoate hydroxymethyltransferase activity	molecular_function	BraA09g051080.3C	0.969442
GO:0005053	peroxisome matrix targeting signal-2 binding	molecular_function	BraA09g035670.3C	0.969442
GO:0004629	phospholipase C activity	molecular_function	BraA05g041950.3C	0.969442
GO:0004457	lactate dehydrogenase activity	molecular_function	BraA01g019340.3C	0.969442
GO:0006221	pyrimidine nucleotide biosynthetic process	biological_process	BraA05g028670.3C	0.969442
GO:0004343	glucosamine 6-phosphate N-acetyltransferase activity	molecular_function	BraA02g006190.3C	0.969442
GO:0000463	maturation of LSU-rRNA from tricistronic rRNA transcript (SSU-rRNA, 5.8S rRNA, LSU-rRNA)	biological_process	BraA03g006370.3C	0.969442
GO:0005534	galactose binding	molecular_function	BraA03g022340.3C	0.969442
GO:0004584	dolichyl-phosphate-mannose-glycolipid alpha-mannosyltransferase activity	molecular_function	BraA08g031340.3C	0.969442
GO:0004668	protein-arginine deiminase activity	molecular_function	BraA10g030500.3C	0.969442
GO:0004735	pyrroline-5-carboxylate reductase activity	molecular_function	BraA10g024380.3C	0.969442
GO:0000919	cell plate assembly	biological_process	BraA10g031130.3C	0.969442
GO:0006995	cellular response to nitrogen starvation	biological_process	BraA03g064360.3C	0.969442
GO:0004641	phosphoribosylformylglycinamidine cyclo-ligase activity	molecular_function	BraA07g021980.3C	0.969442
GO:0008285	negative regulation of cell proliferation	biological_process	BraA06g042280.3C	0.969442
GO:0007219	Notch signaling pathway	biological_process	BraA10g004420.3C	0.969442
GO:0005943	phosphatidylinositol 3-kinase complex, class IA	cellular_component	BraA07g015170.3C	0.969442
GO:0003980	UDP-glucose:glycoprotein glucosyltransferase activity	molecular_function	BraA07g035830.3C	0.969442
GO:0004555	alpha,alpha-trehalase activity	molecular_function	BraA03g051630.3C	0.969442
GO:0000798	nuclear cohesin complex	cellular_component	BraA09g049440.3C	0.969442
GO:0003876	AMP deaminase activity	molecular_function	BraA04g027120.3C	0.969442
GO:0000719	photoreactive repair	biological_process	BraA03g034670.3C;BraA02g010930.3C;BraA03g032840.3C;BraA06g011870.3C;BraA05g036050.3C;BraA09g006040.3C;BraA05g013190.3C;BraA04g005740.3C;BraA02g029580.3C;BraA10g014870.3C;BraA05g012470.3C;BraA09g029400.3C;BraA05g019570.3C;BraA04g002770.3C;BraA06g015380.3C	0.972655
GO:0000902	cell morphogenesis	biological_process	BraA09g003040.3C;BraA06g007870.3C;BraA05g026390.3C;BraA09g061430.3C;BraA09g048480.3C;BraA08g004850.3C;BraA06g037930.3C;BraA01g009600.3C;BraA08g030600.3C;BraA10g024080.3C;BraA07g023090.3C;BraA04g003020.3C;BraA07g036240.3C;BraA05g002740.3C;BraA06g008600.3C	0.972655
GO:0004747	ribokinase activity	molecular_function	BraA05g019830.3C;BraA09g057930.3C;BraA04g002380.3C;BraA04g028850.3C;BraA03g027170.3C;BraA07g023920.3C;BraA03g016690.3C;BraA09g064180.3C;BraA06g043490.3C;BraA03g015310.3C;BraA10g010430.3C;BraA10g004720.3C	0.973648
GO:0009507	chloroplast	cellular_component	BraA08g029770.3C;BraA02g008500.3C;BraA02g028230.3C;BraA01g003490.3C;BraA05g031350.3C;BraA06g010460.3C;BraA05g027550.3C;BraA02g035080.3C;BraA02g006460.3C;BraA01g022230.3C;BraA02g023540.3C;BraA09g049310.3C;BraA03g039900.3C;BraA01g002840.3C;BraA05g035970.3C;BraA06g035960.3C;BraA05g028380.3C;BraA02g005710.3C;BraA03g030360.3C;BraA05g012230.3C;BraA05g025140.3C;BraA03g026220.3C;BraA02g014230.3C;BraA01g0…	0.974172
GO:0006952	defense response	biological_process	BraA07g037160.3C;BraA09g015210.3C;BraA03g009600.3C;BraA06g013330.3C;BraA07g029580.3C;BraA09g020650.3C;BraA07g037170.3C;BraA07g013840.3C;BraA07g028990.3C;BraA03g004610.3C;BraA06g014590.3C;BraA07g042230.3C;BraA05g012760.3C;BraA02g036150.3C;BraA09g020020.3C;BraA05g025040.3C;BraA02g021320.3C;BraA07g029610.3C;BraA07g003200.3C;BraA05g019250.3C;BraA09g019140.3C;BraA07g042480.3C;BraA01g004180.3C;BraA02g0…	0.976209
GO:0004618	phosphoglycerate kinase activity	molecular_function	BraA05g034280.3C;BraA02g025380.3C;BraA07g042460.3C;BraA03g035490.3C	0.979137
GO:0004860	protein kinase inhibitor activity	molecular_function	BraA03g034370.3C;BraA02g030240.3C;BraA05g036220.3C;BraA08g033280.3C	0.979137
GO:0016740	transferase activity	molecular_function	BraA02g038860.3C;BraA04g015030.3C;BraA02g038850.3C;BraA02g039050.3C;BraA06g036320.3C;BraA06g036310.3C	0.981127
GO:0002238	response to molecule of fungal origin	biological_process	BraA10g027520.3C;BraA03g053630.3C;BraA01g033830.3C;BraA05g028030.3C;BraA08g019480.3C;BraA01g018060.3C	0.981127
GO:0002181	cytoplasmic translation	biological_process	BraA09g032050.3C;BraA10g003800.3C;BraA02g030640.3C;BraA09g011180.3C;BraA07g002690.3C;BraA06g029980.3C	0.981127
GO:0004452	isopentenyl-diphosphate delta-isomerase activity	molecular_function	BraA03g007480.3C;BraA03g031130.3C	0.981436
GO:0005784	Sec61 translocon complex	cellular_component	BraA03g023520.3C;BraA10g018240.3C	0.981436
GO:0000776	kinetochore	cellular_component	BraA03g004410.3C;BraA05g031780.3C	0.981436
GO:0009107	lipoate biosynthetic process	biological_process	BraA06g030880.3C;BraA02g002740.3C	0.981436
GO:0004609	phosphatidylserine decarboxylase activity	molecular_function	BraA01g016690.3C;BraA01g011910.3C	0.981436
GO:0006487	protein N-linked glycosylation	biological_process	BraA08g031410.3C;BraA02g000730.3C	0.981436
GO:0004306	ethanolamine-phosphate cytidylyltransferase activity	molecular_function	BraA06g034410.3C;BraA03g020340.3C	0.981436
GO:0004801	sedoheptulose-7-phosphate:D-glyceraldehyde-3-phosphate glyceronetransferase activity	molecular_function	BraA03g005720.3C;BraA06g009430.3C	0.981436
GO:0001673	male germ cell nucleus	cellular_component	BraA03g038760.3C;BraA09g045480.3C	0.981436
GO:0000917	barrier septum assembly	biological_process	BraA10g016260.3C;BraA10g026660.3C	0.981436
GO:0006810	transport	biological_process	BraA03g026380.3C;BraA04g032450.3C;BraA02g031130.3C;BraA01g036020.3C;BraA03g011990.3C;BraA06g012020.3C;BraA05g030950.3C;BraA02g020050.3C	0.984066
GO:0008194	UDP-glycosyltransferase activity	molecular_function	BraA01g021230.3C;BraA09g044100.3C;BraA07g014710.3C;BraA05g025010.3C;BraA05g014480.3C;BraA02g006790.3C;BraA05g008390.3C;BraA01g021380.3C;BraA03g040010.3C;BraA05g025020.3C;BraA01g022800.3C;BraA05g014470.3C;BraA03g019140.3C;BraA10g028620.3C;BraA05g008540.3C;BraA05g008550.3C;BraA03g046260.3C;BraA09g044110.3C;BraA03g040000.3C;BraA01g021270.3C;BraA01g021250.3C;BraA08g016140.3C;BraA04g022840.3C;BraA04g0…	0.988291
GO:0000138	Golgi trans cisterna	cellular_component	BraA04g001510.3C;BraA09g050560.3C;BraA01g044490.3C	0.989629
GO:0043086	negative regulation of catalytic activity	biological_process	BraA07g029830.3C;BraA10g010210.3C;BraA06g025880.3C	0.989629
GO:0005730	nucleolus	cellular_component	BraA01g042390.3C;BraA05g039720.3C;BraA02g040870.3C;BraA03g032180.3C;BraA07g020320.3C;BraA04g013350.3C;BraA10g001470.3C	0.989951
GO:0000989	transcription factor activity, transcription factor binding	molecular_function	BraA05g019330.3C;BraA03g016680.3C;BraA02g017030.3C;BraA07g026570.3C;BraA09g023210.3C;BraA07g027710.3C;BraA06g040430.3C;BraA06g022010.3C;BraA02g024800.3C;BraA09g028240.3C;BraA02g022870.3C;BraA06g003280.3C;BraA07g041700.3C;BraA08g003010.3C;BraA01g000250.3C;BraA08g022730.3C;BraA06g044590.3C	0.990775
GO:0004866	endopeptidase inhibitor activity	molecular_function	BraA07g028790.3C;BraA03g020930.3C;BraA07g037460.3C;BraA07g036670.3C;BraA07g037440.3C;BraA07g037410.3C;BraA07g011590.3C;BraA07g037430.3C;BraA06g013650.3C;BraA07g037450.3C;BraA08g029030.3C;BraA02g020900.3C;BraA07g037420.3C;BraA09g004590.3C;BraA02g020920.3C;BraA09g036210.3C	0.993288
GO:0006636	unsaturated fatty acid biosynthetic process	biological_process	BraA05g031200.3C;BraA03g037190.3C;BraA05g031170.3C;BraA09g016490.3C;BraA05g031210.3C;BraA01g017750.3C	0.994111
GO:0004519	endonuclease activity	molecular_function	BraA01g001430.3C;BraA01g006850.3C;BraA09g062340.3C;BraA03g041860.3C;BraA10g012240.3C;BraA04g004340.3C;BraA08g017630.3C;BraA03g061620.3C;BraA06g020570.3C;BraA09g050150.3C;BraA03g044200.3C;BraA06g020610.3C;BraA02g042950.3C;BraA09g006880.3C;BraA01g039300.3C;BraA05g000110.3C;BraA03g044190.3C;BraA03g044150.3C;BraA02g014130.3C;BraA01g043460.3C;BraA09g030340.3C;BraA02g035750.3C;BraA08g015780.3C;BraA04g0…	0.994114
GO:0009570	chloroplast stroma	cellular_component	BraA10g020580.3C	0.994659
GO:0006808	regulation of nitrogen utilization	biological_process	BraA07g035840.3C	0.994659
GO:0016798	hydrolase activity, acting on glycosyl bonds	molecular_function	BraA06g013960.3C	0.994659
GO:0008233	peptidase activity	molecular_function	BraA09g054900.3C	0.994659
GO:0009791	post-embryonic development	biological_process	BraA02g003020.3C	0.994659
GO:0000213	tRNA-intron endonuclease activity	molecular_function	BraA10g017780.3C	0.994659

## Sheet: Table S3
Table S3. KEGG pathway analysis of the DMGs in s_stem vs. wt_stem.
Pathway ID	Pathway name	Genes	p value
2010	ABC transporters	BraA08g035650.3C;BraA07g003110.3C;BraA07g007210.3C;BraA04g005350.3C;BraA06g043650.3C;BraA01g036210.3C;BraA08g004170.3C;BraA04g004730.3C;BraA03g044720.3C;BraA03g053680.3C;BraA01g026030.3C;BraA02g029690.3C;BraA05g000840.3C;BraA06g001390.3C;BraA03g019210.3C;BraA06g007590.3C;BraA07g010550.3C;BraA02g036580.3C;BraA08g029950.3C;BraA07g033220.3C;BraA06g023510.3C;BraA02g034630.3C;BraA10g020910.3C;BraA04g0…	0.00075649
4144	Endocytosis	BraA02g036020.3C;BraA02g043330.3C;BraA08g016130.3C;BraA09g042430.3C;BraA05g017350.3C;BraA03g063720.3C;BraA01g041600.3C;BraA09g026480.3C;BraA09g062330.3C;BraA04g028490.3C;BraA06g006440.3C;BraA05g031090.3C;BraA04g001480.3C;BraA09g061950.3C;BraA02g014530.3C;BraA08g019940.3C;BraA08g034630.3C;BraA03g018100.3C;BraA03g035270.3C;BraA01g043680.3C;BraA09g057270.3C;BraA06g016220.3C;BraA01g042250.3C;BraA02g0…	0.0164768
4141	Protein processing in endoplasmic reticulum	BraA01g014950.3C;BraA03g029300.3C;BraA08g034070.3C;BraA02g037150.3C;BraA05g038590.3C;BraA02g018590.3C;BraA02g034720.3C;BraA09g051900.3C;BraA02g013750.3C;BraA02g001500.3C;BraA08g022770.3C;BraA05g031740.3C;BraA09g044190.3C;BraA06g016560.3C;BraA01g005400.3C;BraA08g008010.3C;BraA05g040200.3C;BraA03g009190.3C;BraA06g035000.3C;BraA05g029140.3C;BraA03g032920.3C;BraA09g050700.3C;BraA03g032660.3C;BraA06g0…	0.0213983
350	Tyrosine metabolism	BraA09g056260.3C;BraA09g055010.3C;BraA03g000200.3C;BraA08g011500.3C;BraA05g001540.3C;BraA10g012200.3C;BraA05g037210.3C;BraA02g035530.3C;BraA04g012670.3C;BraA01g035830.3C;BraA07g043070.3C;BraA01g025290.3C;BraA07g000490.3C;BraA03g045650.3C;BraA02g025980.3C;BraA09g012250.3C;BraA07g025760.3C;BraA04g016260.3C;BraA09g055020.3C;BraA10g015090.3C;BraA06g009540.3C;BraA09g012270.3C;BraA07g000480.3C;BraA08g0…	0.0608471
3008	Ribosome biogenesis in eukaryotes	BraA08g034840.3C;BraA01g011580.3C;BraA09g006220.3C;BraA06g031060.3C;BraA07g043060.3C;BraA03g064280.3C;BraA09g061850.3C;BraA07g025770.3C;BraA01g030670.3C;BraA08g024870.3C;BraA09g009540.3C;BraA04g011670.3C;BraA05g019550.3C;BraA05g017100.3C;BraA03g007780.3C;BraA04g011240.3C;BraA09g019720.3C;BraA09g047250.3C;BraA09g003490.3C;BraA09g056180.3C;BraA06g038970.3C;BraA06g017880.3C;BraA04g017060.3C;BraA01g0…	0.0692465
500	Starch and sucrose metabolism	BraA01g041060.3C;BraA01g019450.3C;BraA05g032320.3C;BraA10g023260.3C;BraA10g027740.3C;BraA03g023380.3C;BraA07g027120.3C;BraA04g028900.3C;BraA05g039870.3C;BraA04g015040.3C;BraA03g025240.3C;BraA07g023240.3C;BraA01g014700.3C;BraA04g026410.3C;BraA09g004510.3C;BraA09g010430.3C;BraA02g034940.3C;BraA03g023690.3C;BraA03g051630.3C;BraA07g008810.3C;BraA03g013290.3C;BraA01g003770.3C;BraA10g013180.3C;BraA06g0…	0.0830235
3018	RNA degradation	BraA07g018930.3C;BraA09g017560.3C;BraA06g027530.3C;BraA02g007560.3C;BraA10g021830.3C;BraA10g029790.3C;BraA05g031610.3C;BraA03g008570.3C;BraA10g020970.3C;BraA03g034350.3C;BraA09g051160.3C;BraA10g031480.3C;BraA06g000300.3C;BraA06g026520.3C;BraA10g033340.3C;BraA05g022790.3C;BraA03g047910.3C;BraA03g041010.3C;BraA07g023490.3C;BraA03g036950.3C;BraA08g016930.3C;BraA09g048830.3C;BraA09g033280.3C;BraA08g0…	0.0851122
310	Lysine degradation	BraA04g022640.3C;BraA09g034330.3C;BraA05g004110.3C;BraA03g037930.3C;BraA04g025000.3C;BraA06g013480.3C;BraA07g024090.3C;BraA05g011550.3C;BraA06g041290.3C;BraA07g040740.3C;BraA07g033080.3C;BraA09g049840.3C;BraA09g019220.3C;BraA07g025980.3C;BraA10g031430.3C;BraA06g013470.3C;BraA04g023880.3C;BraA03g057740.3C;BraA09g002170.3C;BraA06g013510.3C;BraA03g001820.3C;BraA03g054020.3C;BraA09g053230.3C;BraA10g0…	0.101801
3430	Mismatch repair	BraA05g026740.3C;BraA09g051840.3C;BraA10g011960.3C;BraA09g058450.3C;BraA03g014510.3C;BraA02g016460.3C;BraA03g029310.3C;BraA03g057040.3C;BraA07g042730.3C;BraA06g030840.3C;BraA03g038390.3C;BraA07g011080.3C;BraA03g004490.3C;BraA03g059490.3C;BraA10g011690.3C;BraA03g026840.3C;BraA09g000530.3C;BraA08g028910.3C;BraA06g040910.3C;BraA02g027070.3C;BraA07g008740.3C;BraA02g014180.3C;BraA08g029720.3C;BraA06g0…	0.102003
562	Inositol phosphate metabolism	BraA08g022970.3C;BraA03g021840.3C;BraA09g047600.3C;BraA05g008080.3C;BraA04g026490.3C;BraA09g018830.3C;BraA01g024160.3C;BraA01g041190.3C;BraA10g031760.3C;BraA02g011480.3C;BraA03g001880.3C;BraA01g041130.3C;BraA04g003670.3C;BraA10g004480.3C;BraA04g019370.3C;BraA10g032590.3C;BraA06g037270.3C;BraA10g016590.3C;BraA02g035230.3C;BraA07g033250.3C;BraA10g031770.3C;BraA10g004300.3C;BraA01g004360.3C;BraA06g0…	0.114007
400	Phenylalanine, tyrosine and tryptophan biosynthesis	BraA05g022200.3C;BraA05g033090.3C;BraA05g020020.3C;BraA03g032670.3C;BraA02g007380.3C;BraA09g058590.3C;BraA10g018830.3C;BraA06g036510.3C;BraA09g037560.3C;BraA09g062590.3C;BraA01g037680.3C;BraA06g023470.3C;BraA03g041700.3C;BraA04g019960.3C;BraA05g032580.3C;BraA01g000850.3C;BraA06g038020.3C;BraA09g062860.3C;BraA06g035740.3C;BraA03g024690.3C;BraA09g028830.3C;BraA07g012620.3C;BraA01g004550.3C;BraA05g0…	0.127951
460	Cyanoamino acid metabolism	BraA03g062840.3C;BraA09g011740.3C;BraA01g004100.3C;BraA09g048420.3C;BraA04g000790.3C;BraA01g029330.3C;BraA02g014900.3C;BraA01g029340.3C;BraA09g029850.3C;BraA08g017910.3C;BraA06g019840.3C;BraA05g033960.3C;BraA06g019860.3C;BraA05g013050.3C;BraA09g052040.3C;BraA06g008000.3C;BraA06g044590.3C;BraA03g064410.3C;BraA01g016930.3C;BraA06g015420.3C;BraA06g007980.3C;BraA01g040350.3C;BraA04g025400.3C;BraA08g0…	0.143906
300	Lysine biosynthesis	BraA05g017280.3C;BraA03g005010.3C;BraA02g030310.3C;BraA03g002240.3C;BraA09g044590.3C;BraA03g042440.3C;BraA05g008100.3C;BraA06g021650.3C;BraA03g004380.3C;BraA01g004450.3C;BraA07g021370.3C;BraA02g032600.3C;BraA10g026360.3C;BraA03g042430.3C;BraA08g016470.3C;BraA05g017060.3C;BraA01g007660.3C;BraA10g032160.3C	0.149475
4145	Phagosome	BraA04g029640.3C;BraA09g035750.3C;BraA03g010770.3C;BraA05g028520.3C;BraA04g022390.3C;BraA07g032030.3C;BraA10g014780.3C;BraA06g018610.3C;BraA02g031210.3C;BraA07g011410.3C;BraA05g007930.3C;BraA01g034150.3C;BraA06g020000.3C;BraA01g023770.3C;BraA10g026070.3C;BraA05g011230.3C;BraA09g033790.3C;BraA08g035710.3C;BraA05g010950.3C;BraA09g051180.3C;BraA01g025030.3C;BraA06g003540.3C;BraA05g010960.3C;BraA01g0…	0.160304
4120	Ubiquitin mediated proteolysis	BraA02g019480.3C;BraA08g026090.3C;BraA08g025950.3C;BraA09g049900.3C;BraA02g036930.3C;BraA07g019360.3C;BraA10g014010.3C;BraA03g022170.3C;BraA09g050960.3C;BraA05g029640.3C;BraA03g002080.3C;BraA05g017360.3C;BraA09g048610.3C;BraA03g016030.3C;BraA08g032950.3C;BraA07g016190.3C;BraA04g002920.3C;BraA05g017450.3C;BraA03g043320.3C;BraA07g034540.3C;BraA02g019980.3C;BraA05g013410.3C;BraA08g030240.3C;BraA03g0…	0.172726
904	Diterpenoid biosynthesis	BraA09g016580.3C;BraA02g025070.3C;BraA08g005940.3C;BraA01g036610.3C;BraA03g062370.3C;BraA05g012040.3C;BraA03g002880.3C;BraA08g014480.3C;BraA06g010260.3C;BraA03g028730.3C;BraA09g062880.3C;BraA06g033010.3C;BraA08g030300.3C;BraA06g032250.3C;BraA04g009850.3C;BraA10g001200.3C;BraA06g001790.3C;BraA08g027470.3C;BraA10g002250.3C;BraA10g018720.3C;BraA09g016520.3C;BraA04g007600.3C;BraA06g022430.3C;BraA09g0…	0.195748
290	Valine, leucine and isoleucine biosynthesis	BraA01g024210.3C;BraA02g005320.3C;BraA02g025820.3C;BraA05g037550.3C;BraA04g008640.3C;BraA06g040390.3C;BraA02g028220.3C;BraA08g006460.3C;BraA03g022560.3C;BraA02g006420.3C;BraA07g043030.3C;BraA02g012440.3C;BraA09g027810.3C;BraA05g016930.3C;BraA04g022900.3C;BraA05g032490.3C;BraA02g025810.3C;BraA01g037150.3C;BraA03g027380.3C;BraA02g025840.3C;BraA08g009360.3C;BraA06g011020.3C;BraA02g034900.3C;BraA05g0…	0.197336
62	Fatty acid elongation	BraA09g018510.3C;BraA03g027100.3C;BraA09g022650.3C;BraA07g012430.3C;BraA02g026460.3C;BraA03g030060.3C;BraA10g023600.3C;BraA09g065990.3C;BraA10g031470.3C;BraA06g005040.3C;BraA10g017010.3C;BraA01g025460.3C;BraA02g010720.3C;BraA10g031780.3C;BraA06g041190.3C;BraA02g016020.3C;BraA03g047530.3C;BraA07g029700.3C;BraA09g046170.3C;BraA09g052820.3C;BraA05g001130.3C;BraA07g012420.3C;BraA03g036230.3C;BraA07g0…	0.20217
908	Zeatin biosynthesis	BraA09g011860.3C;BraA10g028670.3C;BraA06g002740.3C;BraA02g020480.3C;BraA07g014720.3C;BraA02g017430.3C;BraA04g019910.3C;BraA01g030410.3C;BraA07g001320.3C;BraA09g040620.3C;BraA09g040600.3C;BraA04g000310.3C;BraA09g052370.3C;BraA07g009460.3C;BraA01g031750.3C;BraA02g012590.3C;BraA07g014730.3C;BraA10g019400.3C;BraA01g033870.3C;BraA03g014910.3C;BraA04g024410.3C;BraA05g025010.3C;BraA09g044100.3C;BraA09g0…	0.21165
232	Caffeine metabolism	BraA04g031610.3C;BraA04g001410.3C;BraA07g009620.3C;BraA05g005290.3C;BraA04g031600.3C;BraA04g001440.3C;BraA04g006520.3C;BraA09g050660.3C	0.231946
380	Tryptophan metabolism	BraA06g022070.3C;BraA02g002210.3C;BraA09g024220.3C;BraA05g003870.3C;BraA08g017020.3C;BraA07g003570.3C;BraA07g038080.3C;BraA10g026830.3C;BraA03g059440.3C;BraA06g021550.3C;BraA06g023170.3C;BraA06g009440.3C;BraA05g011570.3C;BraA02g005530.3C;BraA06g043510.3C;BraA03g061220.3C;BraA07g015680.3C;BraA07g015530.3C;BraA05g014100.3C;BraA05g012890.3C;BraA03g044300.3C;BraA03g002810.3C;BraA09g039820.3C;BraA06g0…	0.24719
941	Flavonoid biosynthesis	BraA02g044200.3C;BraA10g020190.3C;BraA08g012060.3C;BraA09g007920.3C;BraA10g009560.3C;BraA02g042070.3C;BraA05g033360.3C;BraA01g037950.3C;BraA02g004400.3C;BraA02g044190.3C;BraA09g028040.3C;BraA02g022690.3C;BraA01g003480.3C;BraA01g038540.3C;BraA08g020170.3C;BraA09g046720.3C;BraA03g027870.3C;BraA01g020510.3C;BraA03g047210.3C;BraA08g020190.3C;BraA04g005570.3C;BraA02g004420.3C;BraA03g059660.3C;BraA09g0…	0.267653
3050	Proteasome	BraA02g030360.3C;BraA05g041610.3C;BraA07g015080.3C;BraA05g013660.3C;BraA06g017260.3C;BraA08g018990.3C;BraA02g017530.3C;BraA02g014760.3C;BraA05g025180.3C;BraA10g016200.3C;BraA03g009350.3C;BraA04g021780.3C;BraA06g028040.3C;BraA08g000140.3C;BraA04g020800.3C;BraA06g001100.3C;BraA03g025300.3C;BraA02g003230.3C;BraA10g006700.3C;BraA06g044010.3C;BraA01g026110.3C;BraA02g037740.3C;BraA08g033920.3C;BraA04g0…	0.27233
901	Indole alkaloid biosynthesis	BraA02g019050.3C;BraA03g060420.3C;BraA10g027580.3C;BraA04g017290.3C;BraA04g017280.3C;BraA03g021900.3C;BraA05g002170.3C;BraA09g054170.3C;BraA04g003560.3C;BraA04g017330.3C;BraA06g005630.3C;BraA04g017320.3C;BraA04g003570.3C;BraA02g022050.3C;BraA02g022030.3C;BraA07g022650.3C;BraA05g028280.3C;BraA01g001860.3C;BraA04g012550.3C;BraA09g028520.3C;BraA09g047690.3C;BraA09g047700.3C;BraA09g049420.3C;BraA05g0…	0.275653
61	Fatty acid biosynthesis	BraA07g026960.3C;BraA05g000590.3C;BraA07g038670.3C;BraA09g043760.3C;BraA05g039380.3C;BraA03g041760.3C;BraA05g009570.3C;BraA06g041960.3C;BraA06g033900.3C;BraA08g025130.3C;BraA07g010900.3C;BraA01g043320.3C;BraA09g024540.3C;BraA03g031070.3C;BraA04g008870.3C;BraA01g044130.3C;BraA02g016150.3C;BraA03g041460.3C;BraA02g032750.3C;BraA10g026610.3C;BraA01g044100.3C;BraA09g059570.3C;BraA05g039920.3C;BraA03g0…	0.278522
73	Cutin, suberine and wax biosynthesis	BraA07g020390.3C;BraA04g030440.3C;BraA09g055230.3C;BraA07g038550.3C;BraA04g026730.3C;BraA03g005380.3C;BraA02g013210.3C;BraA05g014570.3C;BraA06g044290.3C;BraA06g008630.3C;BraA08g016400.3C;BraA03g010330.3C;BraA02g044170.3C;BraA03g012250.3C;BraA10g013230.3C;BraA09g018290.3C;BraA02g003630.3C;BraA08g035260.3C;BraA09g054200.3C;BraA03g065310.3C;BraA03g055210.3C;BraA09g000630.3C;BraA08g010160.3C;BraA09g0…	0.303257
100	Steroid biosynthesis	BraA03g050430.3C;BraA03g051320.3C;BraA04g007810.3C;BraA07g021590.3C;BraA02g001210.3C;BraA08g003480.3C;BraA01g003670.3C;BraA03g001420.3C;BraA01g013360.3C;BraA01g033430.3C;BraA03g027570.3C;BraA03g031040.3C;BraA08g005700.3C;BraA08g002990.3C;BraA09g050560.3C;BraA04g016830.3C;BraA10g032070.3C;BraA08g000260.3C;BraA01g044090.3C;BraA06g015610.3C;BraA05g001630.3C;BraA08g028770.3C;BraA03g029680.3C;BraA09g0…	0.309818
250	Alanine, aspartate and glutamate metabolism	BraA02g006980.3C;BraA10g026230.3C;BraA09g010000.3C;BraA01g034890.3C;BraA03g007980.3C;BraA02g025290.3C;BraA03g004190.3C;BraA05g025100.3C;BraA05g025080.3C;BraA01g000580.3C;BraA04g027210.3C;BraA03g005130.3C;BraA05g040610.3C;BraA07g031850.3C;BraA02g035300.3C;BraA06g019700.3C;BraA05g025070.3C;BraA03g007920.3C;BraA01g044830.3C;BraA10g024420.3C;BraA03g042340.3C;BraA06g028460.3C;BraA06g023920.3C;BraA02g0…	0.347212
3013	RNA transport	BraA03g029790.3C;BraA09g001530.3C;BraA01g006890.3C;BraA10g004290.3C;BraA05g000860.3C;BraA07g010500.3C;BraA06g044060.3C;BraA01g033610.3C;BraA03g053440.3C;BraA05g026810.3C;BraA01g009620.3C;BraA01g035050.3C;BraA09g047500.3C;BraA04g001980.3C;BraA09g058840.3C;BraA02g035330.3C;BraA09g046880.3C;BraA04g025170.3C;BraA02g033470.3C;BraA01g038420.3C;BraA10g020840.3C;BraA05g003230.3C;BraA04g020510.3C;BraA03g0…	0.351616
3440	Homologous recombination	BraA07g011930.3C;BraA08g034810.3C;BraA03g012430.3C;BraA06g000030.3C;BraA06g043500.3C;BraA03g039170.3C;BraA07g025200.3C;BraA06g032510.3C;BraA09g057680.3C;BraA01g014710.3C;BraA08g011560.3C;BraA03g043080.3C;BraA03g034420.3C;BraA09g026210.3C;BraA09g020070.3C;BraA09g055080.3C;BraA01g004760.3C;BraA10g004320.3C;BraA04g028880.3C;BraA02g044350.3C;BraA03g017040.3C;BraA10g003740.3C;BraA03g010420.3C;BraA02g0…	0.35696
260	Glycine, serine and threonine metabolism	BraA03g027330.3C;BraA01g040520.3C;BraA07g028040.3C;BraA10g011540.3C;BraA02g042750.3C;BraA08g031570.3C;BraA08g025430.3C;BraA09g031190.3C;BraA08g009910.3C;BraA03g018310.3C;BraA09g059110.3C;BraA05g029880.3C;BraA09g062680.3C;BraA03g060350.3C;BraA08g009920.3C;BraA08g006110.3C;BraA01g021490.3C;BraA03g045840.3C;BraA08g027740.3C;BraA09g010830.3C;BraA03g043860.3C;BraA07g019650.3C;BraA08g006070.3C;BraA02g0…	0.38991
4626	Plant-pathogen interaction	BraA05g019780.3C;BraA02g031710.3C;BraA01g027860.3C;BraA07g030170.3C;BraA08g026430.3C;BraA05g039310.3C;BraA10g014930.3C;BraA05g008990.3C;BraA02g028750.3C;BraA03g053310.3C;BraA05g018010.3C;BraA02g023580.3C;BraA06g002310.3C;BraA02g013120.3C;BraA06g044350.3C;BraA05g008220.3C;BraA06g031040.3C;BraA09g011410.3C;BraA04g024220.3C;BraA04g028340.3C;BraA02g032770.3C;BraA04g022490.3C;BraA09g047260.3C;BraA06g0…	0.404596
4075	Plant hormone signal transduction	BraA03g021430.3C;BraA05g001990.3C;BraA03g001290.3C;BraA07g029850.3C;BraA04g012560.3C;BraA07g022220.3C;BraA05g029710.3C;BraA03g018910.3C;BraA01g041390.3C;BraA01g008680.3C;BraA02g012230.3C;BraA01g016840.3C;BraA04g018550.3C;BraA05g011670.3C;BraA06g030280.3C;BraA01g030310.3C;BraA10g000620.3C;BraA10g008240.3C;BraA06g020840.3C;BraA09g045200.3C;BraA01g004630.3C;BraA06g018810.3C;BraA09g009300.3C;BraA05g0…	0.414299
480	Glutathione metabolism	BraA04g017740.3C;BraA02g019500.3C;BraA03g029050.3C;BraA04g013580.3C;BraA02g028350.3C;BraA05g000010.3C;BraA02g006880.3C;BraA04g021100.3C;BraA05g014700.3C;BraA06g004710.3C;BraA06g007200.3C;BraA07g026610.3C;BraA09g017650.3C;BraA04g022100.3C;BraA08g028190.3C;BraA04g024660.3C;BraA10g006200.3C;BraA07g026640.3C;BraA02g024660.3C;BraA08g006790.3C;BraA09g001660.3C;BraA07g040730.3C;BraA10g001580.3C;BraA09g0…	0.416537
710	Carbon fixation in photosynthetic organisms	BraA07g022160.3C;BraA02g037000.3C;BraA05g023780.3C;BraA04g004360.3C;BraA08g008980.3C;BraA08g007230.3C;BraA09g033090.3C;BraA09g060510.3C;BraA06g008890.3C;BraA06g038170.3C	0.429735
240	Pyrimidine metabolism	BraA09g035170.3C;BraA04g006190.3C;BraA09g033030.3C;BraA01g011390.3C;BraA03g043050.3C;BraA02g005840.3C;BraA05g018970.3C;BraA06g000390.3C;BraA06g001950.3C;BraA08g025380.3C;BraA07g007920.3C;BraA03g025840.3C;BraA09g062180.3C;BraA01g003720.3C;BraA05g038040.3C;BraA09g050000.3C;BraA06g019980.3C;BraA05g033880.3C;BraA09g045330.3C;BraA04g005410.3C;BraA09g010890.3C;BraA03g035440.3C;BraA06g037800.3C;BraA07g0…	0.4489
909	Sesquiterpenoid and triterpenoid biosynthesis	BraA09g045390.3C;BraA10g012740.3C;BraA05g023750.3C;BraA03g063030.3C;BraA03g061960.3C;BraA03g062960.3C;BraA01g037210.3C;BraA01g038410.3C;BraA03g036500.3C;BraA01g037220.3C;BraA07g042010.3C;BraA04g011870.3C;BraA06g012550.3C;BraA10g015690.3C;BraA02g031380.3C;BraA03g049170.3C;BraA08g014160.3C;BraA06g031370.3C;BraA01g037250.3C;BraA09g021260.3C;BraA03g035710.3C;BraA07g042000.3C;BraA03g036520.3C;BraA07g0…	0.461334
942	Anthocyanin biosynthesis	BraA06g003890.3C;BraA03g046290.3C;BraA06g021610.3C;BraA03g014130.3C;BraA03g040000.3C;BraA03g014120.3C;BraA02g014230.3C;BraA01g032010.3C;BraA03g061390.3C;BraA03g014140.3C;BraA05g025420.3C;BraA10g012180.3C;BraA03g061370.3C;BraA02g014220.3C;BraA01g021150.3C;BraA01g021380.3C;BraA08g003300.3C;BraA03g046300.3C;BraA05g025380.3C;BraA03g014180.3C;BraA03g014150.3C;BraA01g031990.3C;BraA08g011250.3C;BraA09g0…	0.461334
600	Sphingolipid metabolism	BraA09g060050.3C;BraA06g003750.3C;BraA07g004760.3C;BraA05g037040.3C;BraA01g033830.3C;BraA04g005770.3C;BraA05g000940.3C;BraA01g010750.3C;BraA05g007580.3C;BraA07g036250.3C;BraA01g031130.3C;BraA08g014410.3C;BraA09g030410.3C;BraA02g031740.3C;BraA02g032210.3C;BraA05g000240.3C;BraA03g032360.3C;BraA08g025650.3C;BraA07g002040.3C;BraA03g064570.3C;BraA06g024750.3C;BraA08g033640.3C;BraA06g041140.3C;BraA08g0…	0.49102
966	Glucosinolate biosynthesis	BraA03g043730.3C;BraA04g024980.3C;BraA02g042660.3C;BraA09g024170.3C;BraA03g043750.3C;BraA04g024970.3C;BraA06g014220.3C;BraA05g010390.3C;BraA04g029510.3C;BraA07g027460.3C;BraA04g008320.3C;BraA03g043740.3C;BraA04g028510.3C;BraA01g028570.3C;BraA09g018100.3C;BraA07g028430.3C;BraA09g018130.3C;BraA06g012350.3C;BraA09g024150.3C;BraA02g042670.3C;BraA09g018080.3C;BraA07g038050.3C;BraA09g016680.3C;BraA02g0…	0.51959
740	Riboflavin metabolism	BraA08g014690.3C;BraA10g032630.3C;BraA06g018570.3C;BraA07g000150.3C;BraA06g019630.3C;BraA04g015110.3C;BraA06g024490.3C;BraA03g052780.3C;BraA03g023190.3C;BraA09g008210.3C;BraA03g001110.3C;BraA08g022010.3C;BraA09g018640.3C;BraA03g049380.3C;BraA04g031330.3C;BraA01g012180.3C;BraA09g054860.3C;BraA02g010750.3C	0.525608
601	Glycosphingolipid biosynthesis - lacto and neolacto series	BraA05g031840.3C;BraA02g020230.3C;BraA03g053720.3C;BraA03g028610.3C;BraA01g029890.3C;BraA04g012410.3C;BraA10g002100.3C;BraA01g036790.3C;BraA06g001560.3C;BraA07g035740.3C;BraA07g020030.3C;BraA08g019400.3C;BraA01g043530.3C	0.531127
591	Linoleic acid metabolism	BraA07g031000.3C;BraA07g030990.3C;BraA07g031020.3C;BraA07g031010.3C;BraA07g025400.3C;BraA02g016000.3C;BraA02g021090.3C;BraA01g026400.3C;BraA01g026390.3C;BraA08g029260.3C;BraA01g031660.3C;BraA02g017730.3C;BraA05g024820.3C	0.531127
220	Arginine biosynthesis	BraA04g009900.3C;BraA02g024700.3C;BraA02g027800.3C;BraA05g020160.3C;BraA01g000040.3C;BraA07g040040.3C;BraA04g006880.3C;BraA08g014800.3C;BraA10g001180.3C;BraA03g056870.3C;BraA06g039680.3C;BraA01g006700.3C;BraA10g016960.3C;BraA03g052090.3C;BraA06g007330.3C;BraA06g025730.3C;BraA07g010370.3C;BraA04g000670.3C;BraA07g014210.3C;BraA03g018430.3C;BraA08g009150.3C;BraA09g032720.3C;BraA03g060930.3C;BraA03g0…	0.548834
592	alpha-Linolenic acid metabolism	BraA08g028140.3C;BraA02g030050.3C;BraA03g060050.3C;BraA07g028600.3C;BraA09g024530.3C;BraA06g022770.3C;BraA05g021060.3C;BraA10g031930.3C;BraA07g016240.3C;BraA06g038770.3C;BraA02g018030.3C;BraA07g017570.3C;BraA08g021080.3C;BraA07g032310.3C;BraA07g019420.3C;BraA05g040640.3C;BraA08g019810.3C;BraA05g035420.3C;BraA02g017120.3C;BraA07g015710.3C;BraA02g017110.3C;BraA10g031900.3C;BraA05g035440.3C;BraA03g0…	0.550901
3060	Protein export	BraA01g020750.3C;BraA03g004170.3C;BraA09g045310.3C;BraA08g029930.3C;BraA01g035640.3C;BraA02g026240.3C;BraA09g054900.3C;BraA09g058820.3C;BraA06g011370.3C;BraA09g006770.3C;BraA02g040730.3C;BraA08g004120.3C;BraA04g024640.3C;BraA07g008590.3C;BraA08g026930.3C;BraA06g018370.3C;BraA07g002000.3C;BraA04g020640.3C;BraA06g025450.3C;BraA09g022940.3C;BraA02g016240.3C;BraA07g032920.3C;BraA02g036180.3C;BraA03g0…	0.55441
770	Pantothenate and CoA biosynthesis	BraA07g018230.3C;BraA09g017230.3C;BraA03g038240.3C;BraA01g005840.3C;BraA09g015250.3C;BraA09g051080.3C;BraA01g003040.3C;BraA06g030540.3C;BraA03g025100.3C;BraA07g002470.3C;BraA10g033480.3C;BraA05g020140.3C;BraA03g038050.3C;BraA09g015140.3C;BraA02g000410.3C;BraA05g029500.3C;BraA05g035450.3C;BraA05g022530.3C;BraA01g028220.3C;BraA03g038250.3C;BraA05g031800.3C;BraA08g017190.3C	0.556971
564	Glycerophospholipid metabolism	BraA02g017270.3C;BraA05g004680.3C;BraA09g060060.3C;BraA05g015790.3C;BraA03g016900.3C;BraA04g028420.3C;BraA05g017670.3C;BraA01g017520.3C;BraA09g060140.3C;BraA04g028370.3C;BraA10g013400.3C;BraA07g028650.3C;BraA07g017790.3C;BraA01g036540.3C;BraA06g034410.3C;BraA04g028360.3C;BraA04g010470.3C;BraA02g045050.3C;BraA08g033990.3C;BraA03g020820.3C;BraA02g034240.3C;BraA03g012080.3C;BraA05g031400.3C;BraA08g0…	0.558362
10	Glycolysis / Gluconeogenesis	BraA03g059920.3C;BraA10g007340.3C;BraA09g039970.3C;BraA06g000770.3C;BraA06g026340.3C;BraA04g006580.3C;BraA05g038790.3C;BraA07g006870.3C;BraA04g015630.3C;BraA06g011410.3C;BraA01g000200.3C;BraA09g045940.3C;BraA05g027230.3C;BraA03g049040.3C;BraA01g019340.3C;BraA05g008070.3C;BraA09g021230.3C;BraA05g025250.3C;BraA01g038770.3C;BraA03g001030.3C;BraA03g012470.3C;BraA06g029190.3C;BraA02g045310.3C;BraA09g0…	0.563735
943	Isoflavonoid biosynthesis	BraA03g059230.3C;BraA06g024660.3C;BraA09g029550.3C;BraA06g039240.3C;BraA08g015460.3C;BraA05g019630.3C;BraA08g005100.3C;BraA04g030680.3C;BraA03g059240.3C;BraA09g024050.3C;BraA05g030620.3C;BraA01g024130.3C;BraA08g028320.3C;BraA08g035120.3C;BraA05g005160.3C;BraA01g024140.3C;BraA02g002180.3C	0.565313
72	Synthesis and degradation of ketone bodies	BraA05g002050.3C;BraA03g025350.3C;BraA09g000690.3C;BraA09g026740.3C;BraA02g028120.3C;BraA09g061130.3C;BraA06g009690.3C	0.603883
430	Taurine and hypotaurine metabolism	BraA10g024230.3C;BraA04g012330.3C;BraA03g054970.3C;BraA01g000570.3C;BraA09g025420.3C;BraA03g054990.3C;BraA04g002650.3C;BraA05g003210.3C;BraA01g008390.3C;BraA06g044240.3C;BraA03g006630.3C;BraA08g022350.3C;BraA03g054980.3C;BraA06g044230.3C;BraA08g001410.3C;BraA01g000550.3C	0.605822
340	Histidine metabolism	BraA04g023160.3C;BraA05g023920.3C;BraA02g020580.3C;BraA09g008020.3C;BraA01g027200.3C;BraA09g018200.3C;BraA08g007050.3C;BraA01g017670.3C;BraA03g018920.3C;BraA05g020990.3C;BraA09g018750.3C;BraA09g033260.3C;BraA06g027330.3C;BraA04g011710.3C;BraA05g024760.3C;BraA01g031640.3C	0.605822
730	Thiamine metabolism	BraA05g014550.3C;BraA03g013750.3C;BraA07g008940.3C;BraA06g029230.3C;BraA03g052640.3C;BraA09g008770.3C;BraA02g015480.3C;BraA10g012830.3C;BraA09g040160.3C;BraA03g046310.3C;BraA03g039860.3C;BraA10g026770.3C;BraA01g021140.3C;BraA03g046320.3C;BraA10g001530.3C;BraA06g010880.3C	0.605822
20	Citrate cycle (TCA cycle)	BraA09g009390.3C;BraA10g029800.3C;BraA08g031360.3C;BraA06g001460.3C;BraA05g039890.3C;BraA10g030620.3C;BraA05g032230.3C;BraA06g022700.3C;BraA05g017230.3C;BraA03g044680.3C;BraA06g019480.3C;BraA07g007160.3C;BraA04g002580.3C;BraA08g031940.3C;BraA06g029260.3C;BraA02g040180.3C;BraA10g014600.3C;BraA05g022610.3C;BraA06g037640.3C;BraA10g002950.3C;BraA01g044230.3C;BraA08g015360.3C;BraA03g042060.3C;BraA09g0…	0.631918
511	Other glycan degradation	BraA09g058700.3C;BraA07g012650.3C;BraA01g006460.3C;BraA01g036100.3C;BraA06g018460.3C;BraA03g026030.3C;BraA04g004820.3C;BraA01g030470.3C;BraA06g004900.3C;BraA02g026370.3C;BraA10g024610.3C;BraA01g039800.3C;BraA05g005180.3C;BraA03g024880.3C;BraA09g000710.3C;BraA01g039820.3C;BraA02g037830.3C;BraA05g032830.3C;BraA09g018540.3C;BraA10g028820.3C;BraA05g013960.3C;BraA09g064380.3C;BraA04g020110.3C;BraA09g0…	0.641049
330	Arginine and proline metabolism	BraA08g027890.3C;BraA04g014950.3C;BraA06g036320.3C;BraA01g002730.3C;BraA10g024380.3C;BraA05g003320.3C;BraA03g052670.3C;BraA04g030570.3C;BraA09g003460.3C;BraA03g005860.3C;BraA05g029800.3C;BraA10g021330.3C;BraA03g042550.3C;BraA09g015540.3C;BraA04g004460.3C;BraA06g015790.3C;BraA06g030260.3C;BraA02g016840.3C;BraA08g020560.3C;BraA05g006260.3C;BraA06g036990.3C;BraA08g022660.3C;BraA02g038860.3C;BraA02g0…	0.653866
4712	Circadian rhythm - plant	BraA10g024670.3C;BraA03g024170.3C;BraA04g012050.3C;BraA06g037920.3C;BraA04g000980.3C;BraA10g000470.3C;BraA01g032370.3C;BraA07g021110.3C;BraA06g030710.3C;BraA02g026680.3C;BraA03g000720.3C;BraA09g065950.3C;BraA02g042140.3C;BraA09g003340.3C;BraA05g038000.3C;BraA09g057780.3C;BraA08g024070.3C;BraA03g024140.3C;BraA05g038050.3C;BraA07g018240.3C;BraA04g032170.3C;BraA05g042450.3C;BraA02g000630.3C;BraA09g0…	0.665473
130	Ubiquinone and other terpenoid-quinone biosynthesis	BraA03g046870.3C;BraA01g019490.3C;BraA02g014250.3C;BraA10g005300.3C;BraA01g014350.3C;BraA10g012610.3C;BraA07g025380.3C;BraA05g026420.3C;BraA06g016050.3C;BraA03g051170.3C;BraA08g020880.3C;BraA10g010820.3C;BraA08g011870.3C;BraA02g022480.3C;BraA10g003360.3C;BraA09g026980.3C;BraA09g038870.3C;BraA03g051190.3C;BraA09g053440.3C;BraA07g028130.3C;BraA05g018190.3C;BraA09g026970.3C;BraA07g001790.3C;BraA08g0…	0.68659
4140	Regulation of autophagy	BraA01g028110.3C;BraA04g005840.3C;BraA10g021440.3C;BraA09g051250.3C;BraA09g020260.3C;BraA03g063090.3C;BraA02g017700.3C;BraA06g020360.3C;BraA07g024790.3C;BraA03g008460.3C;BraA03g030500.3C;BraA08g024650.3C;BraA10g008580.3C;BraA01g002230.3C;BraA07g033990.3C;BraA09g045680.3C;BraA04g017080.3C;BraA01g034190.3C;BraA01g034830.3C;BraA10g022680.3C;BraA03g032690.3C;BraA03g044500.3C;BraA04g005150.3C;BraA02g0…	0.692753
650	Butanoate metabolism	BraA09g047420.3C;BraA09g047450.3C	0.694021
950	Isoquinoline alkaloid biosynthesis	BraA01g004890.3C;BraA03g057660.3C	0.694021
520	Amino sugar and nucleotide sugar metabolism	BraA10g022310.3C;BraA02g027690.3C;BraA02g006190.3C;BraA09g036310.3C;BraA02g019710.3C;BraA10g017980.3C;BraA08g015250.3C;BraA08g015280.3C;BraA04g019980.3C;BraA03g055720.3C;BraA04g008800.3C;BraA04g005060.3C;BraA09g020900.3C;BraA09g032990.3C;BraA05g010090.3C;BraA06g043040.3C;BraA03g028190.3C;BraA02g021030.3C;BraA07g015320.3C;BraA06g031470.3C;BraA01g013900.3C;BraA01g012860.3C;BraA03g027720.3C;BraA09g0…	0.702153
531	Glycosaminoglycan degradation	BraA05g008260.3C;BraA03g059200.3C;BraA04g031870.3C;BraA08g015490.3C;BraA03g030120.3C;BraA10g000400.3C;BraA08g009440.3C;BraA02g010230.3C;BraA10g018410.3C;BraA09g050970.3C;BraA09g045630.3C;BraA03g024000.3C;BraA04g001200.3C;BraA03g020630.3C;BraA05g005590.3C;BraA07g028850.3C;BraA03g051030.3C;BraA03g044250.3C;BraA06g019580.3C;BraA03g019370.3C;BraA05g008270.3C;BraA09g066210.3C;BraA03g006520.3C;BraA10g0…	0.705198
280	Valine, leucine and isoleucine degradation	BraA08g022260.3C;BraA08g027370.3C;BraA01g036080.3C;BraA06g020990.3C;BraA06g016890.3C;BraA01g041770.3C;BraA03g058570.3C;BraA05g042260.3C;BraA04g008760.3C;BraA07g008690.3C;BraA03g041130.3C;BraA05g014780.3C;BraA02g045840.3C;BraA04g020930.3C;BraA04g021030.3C;BraA02g035700.3C;BraA08g033880.3C;BraA08g012080.3C;BraA05g031020.3C;BraA08g033890.3C;BraA06g013920.3C;BraA03g003830.3C;BraA03g060720.3C;BraA07g0…	0.705198
910	Nitrogen metabolism	BraA02g005540.3C;BraA07g026900.3C;BraA06g004890.3C;BraA05g040570.3C;BraA01g025680.3C;BraA01g044810.3C;BraA02g001290.3C;BraA06g021140.3C;BraA06g005340.3C;BraA05g012790.3C;BraA06g030010.3C;BraA02g005650.3C;BraA09g011150.3C;BraA07g002990.3C;BraA01g029210.3C;BraA09g015500.3C;BraA09g062950.3C;BraA06g027810.3C;BraA08g014670.3C;BraA01g004520.3C;BraA02g010140.3C;BraA02g024390.3C;BraA01g027230.3C;BraA06g0…	0.709133
514	Other types of O-glycan biosynthesis	BraA09g063500.3C;BraA09g050860.3C;BraA05g036430.3C;BraA08g029350.3C;BraA09g023980.3C;BraA02g016260.3C;BraA04g031790.3C;BraA05g029260.3C;BraA09g036980.3C;BraA04g001270.3C;BraA05g029270.3C;BraA10g005870.3C;BraA06g031170.3C;BraA06g018070.3C;BraA09g050840.3C;BraA06g001140.3C;BraA09g013140.3C;BraA09g050850.3C;BraA01g001630.3C;BraA07g024550.3C;BraA03g050040.3C;BraA08g024810.3C;BraA01g034630.3C;BraA09g0…	0.721071
970	Aminoacyl-tRNA biosynthesis	BraA05g040040.3C;BraA06g003000.3C;BraA05g033200.3C;BraA08g017560.3C;BraA05g030610.3C;BraA01g006660.3C;BraA06g005690.3C;BraA05g035200.3C;BraA09g055820.3C;BraA07g023280.3C;BraA01g037560.3C;BraA02g025600.3C;BraA08g001130.3C;BraA05g027910.3C;BraA10g029860.3C;BraA09g005060.3C;BraA09g035190.3C;BraA03g000860.3C;BraA06g016720.3C;BraA02g008340.3C;BraA04g011770.3C;BraA08g012280.3C;BraA05g013390.3C;BraA06g0…	0.724854
940	Phenylpropanoid biosynthesis	BraA09g029360.3C;BraA10g018620.3C;BraA01g001090.3C;BraA10g012300.3C;BraA10g024460.3C;BraA01g002420.3C;BraA01g021100.3C;BraA02g006460.3C;BraA03g047640.3C;BraA01g002620.3C;BraA10g020890.3C;BraA07g030540.3C;BraA07g031560.3C;BraA06g029960.3C;BraA04g010820.3C;BraA03g003200.3C;BraA08g011180.3C;BraA09g033130.3C;BraA09g009150.3C;BraA02g008550.3C;BraA10g012310.3C;BraA02g008560.3C;BraA05g006330.3C;BraA09g0…	0.749769
790	Folate biosynthesis	BraA05g035180.3C;BraA06g025340.3C;BraA02g024840.3C;BraA08g021880.3C;BraA03g017000.3C;BraA05g001520.3C;BraA09g066090.3C;BraA09g019190.3C;BraA04g020710.3C;BraA01g040490.3C;BraA07g024710.3C;BraA09g059860.3C;BraA03g024110.3C;BraA03g041880.3C;BraA05g038390.3C;BraA03g012180.3C;BraA07g019130.3C;BraA07g012100.3C;BraA07g041750.3C;BraA02g003800.3C;BraA10g028770.3C;BraA10g027000.3C;BraA05g035170.3C;BraA02g0…	0.771093
3030	DNA replication	BraA01g032490.3C;BraA03g062730.3C;BraA09g001830.3C;BraA09g027560.3C;BraA05g000780.3C;BraA03g042890.3C;BraA01g028680.3C;BraA04g009940.3C;BraA07g004620.3C;BraA02g030880.3C;BraA02g040850.3C;BraA09g031930.3C;BraA08g006030.3C;BraA05g024340.3C;BraA01g015540.3C;BraA05g031140.3C;BraA09g014150.3C;BraA08g018890.3C;BraA02g035200.3C;BraA09g052380.3C;BraA10g019730.3C;BraA09g014020.3C;BraA01g016090.3C;BraA01g0…	0.781436
965	Betalain biosynthesis	BraA05g015780.3C;BraA08g011070.3C;BraA05g015770.3C;BraA08g011100.3C	0.803289
71	Fatty acid degradation	BraA06g042500.3C;BraA09g043070.3C;BraA09g022910.3C;BraA10g005020.3C;BraA02g039900.3C;BraA03g054820.3C;BraA02g034210.3C;BraA01g041760.3C;BraA01g040180.3C;BraA08g018800.3C;BraA03g018600.3C;BraA09g008510.3C;BraA04g023760.3C;BraA01g019720.3C;BraA06g025750.3C;BraA03g032970.3C;BraA05g038680.3C;BraA06g035730.3C;BraA05g038700.3C;BraA05g011680.3C;BraA09g004100.3C;BraA01g008530.3C;BraA03g017600.3C;BraA02g0…	0.804134
785	Lipoic acid metabolism	BraA02g031700.3C;BraA06g030880.3C;BraA09g058270.3C;BraA01g006720.3C;BraA06g037670.3C;BraA09g056000.3C;BraA08g017750.3C;BraA10g003170.3C;BraA06g008730.3C;BraA02g037660.3C;BraA02g002740.3C	0.805596
196	Photosynthesis - antenna proteins	BraA05g037360.3C;BraA08g005510.3C;BraA02g041700.3C;BraA01g029170.3C;BraA03g022340.3C;BraA02g023540.3C;BraA09g016320.3C;BraA08g023650.3C;BraA05g010660.3C;BraA09g035160.3C;BraA03g065020.3C;BraA09g045720.3C;BraA07g021900.3C;BraA09g022800.3C;BraA04g001140.3C;BraA03g041940.3C;BraA08g029760.3C;BraA09g028120.3C;BraA05g010700.3C;BraA04g024630.3C;BraA07g024630.3C;BraA03g027230.3C;BraA10g012410.3C;BraA02g0…	0.847763
906	Carotenoid biosynthesis	BraA04g019440.3C;BraA03g048740.3C;BraA01g010660.3C;BraA04g025280.3C;BraA09g014960.3C;BraA08g028150.3C;BraA06g042600.3C;BraA03g026320.3C;BraA06g039790.3C;BraA08g011400.3C;BraA04g005080.3C;BraA09g021180.3C;BraA05g023230.3C;BraA06g005700.3C;BraA04g019480.3C;BraA09g053400.3C;BraA08g016140.3C;BraA01g033670.3C;BraA07g028510.3C;BraA09g042960.3C;BraA07g009070.3C;BraA02g036150.3C;BraA08g024160.3C;BraA05g0…	0.85526
4070	Phosphatidylinositol signaling system	BraA09g029390.3C;BraA09g015890.3C;BraA02g038520.3C;BraA07g003860.3C;BraA10g008630.3C;BraA09g004550.3C;BraA01g026200.3C;BraA10g024300.3C;BraA05g017710.3C;BraA02g013880.3C;BraA09g045430.3C;BraA03g030520.3C;BraA07g017960.3C;BraA03g006600.3C;BraA10g012720.3C;BraA06g001850.3C;BraA03g020470.3C;BraA10g012580.3C;BraA04g008980.3C;BraA06g023250.3C;BraA02g000540.3C;BraA09g017440.3C;BraA10g017710.3C;BraA05g0…	0.859172
944	Flavone and flavonol biosynthesis	BraA05g008550.3C;BraA04g006320.3C;BraA02g006790.3C	0.867726
3450	Non-homologous end-joining	BraA06g012800.3C;BraA10g015060.3C;BraA08g004790.3C	0.867726
410	beta-Alanine metabolism	BraA03g028080.3C;BraA02g039870.3C;BraA09g047590.3C	0.867726
4130	SNARE interactions in vesicular transport	BraA09g064730.3C;BraA06g007930.3C;BraA02g025410.3C;BraA07g013170.3C;BraA03g034970.3C;BraA06g041590.3C;BraA09g061410.3C;BraA07g023310.3C;BraA03g023640.3C;BraA05g035120.3C;BraA03g003210.3C;BraA05g009780.3C;BraA09g056440.3C;BraA05g032600.3C;BraA02g019200.3C;BraA07g021660.3C;BraA08g034680.3C;BraA05g039620.3C;BraA01g008300.3C;BraA06g021000.3C;BraA09g001930.3C;BraA09g046420.3C;BraA07g002460.3C;BraA01g0…	0.872227
30	Pentose phosphate pathway	BraA06g031720.3C;BraA06g031760.3C;BraA06g007610.3C;BraA03g005720.3C;BraA05g003250.3C;BraA02g043170.3C;BraA09g003060.3C;BraA09g009840.3C;BraA04g001550.3C;BraA01g042920.3C;BraA08g025060.3C;BraA06g031750.3C;BraA05g018320.3C;BraA04g028850.3C;BraA09g013040.3C;BraA07g024370.3C;BraA06g031780.3C;BraA07g027360.3C;BraA06g040640.3C;BraA01g034990.3C;BraA03g022480.3C;BraA01g023740.3C;BraA08g004440.3C;BraA05g0…	0.880615
360	Phenylalanine metabolism	BraA09g044270.3C;BraA01g016990.3C;BraA07g033240.3C;BraA07g021160.3C;BraA02g001320.3C;BraA02g018010.3C;BraA08g025270.3C;BraA08g010640.3C;BraA04g006280.3C;BraA04g026260.3C;BraA05g036420.3C;BraA07g012600.3C;BraA09g051500.3C;BraA08g016250.3C;BraA04g015350.3C	0.897683
1040	Biosynthesis of unsaturated fatty acids	BraA05g031200.3C;BraA03g037190.3C;BraA05g031210.3C;BraA05g031170.3C;BraA05g014270.3C;BraA05g034790.3C;BraA08g033950.3C;BraA09g064130.3C;BraA09g016490.3C;BraA09g064150.3C;BraA05g013280.3C;BraA10g004760.3C;BraA09g064140.3C;BraA04g021300.3C;BraA04g022800.3C;BraA08g033940.3C;BraA10g004750.3C;BraA03g034680.3C;BraA03g015910.3C;BraA05g035680.3C;BraA01g039180.3C;BraA08g034060.3C	0.902634
51	Fructose and mannose metabolism	BraA07g037400.3C;BraA03g027170.3C;BraA01g038700.3C;BraA01g039940.3C;BraA10g005710.3C;BraA03g016690.3C;BraA07g034140.3C;BraA05g006280.3C;BraA08g033750.3C;BraA07g017530.3C;BraA10g004720.3C;BraA07g028050.3C;BraA02g017380.3C;BraA07g000160.3C;BraA01g022530.3C;BraA06g009590.3C;BraA05g029810.3C;BraA09g063550.3C;BraA02g045750.3C;BraA03g015310.3C;BraA03g000310.3C;BraA03g023960.3C;BraA05g030360.3C;BraA03g0…	0.92662
905	Brassinosteroid biosynthesis	BraA03g059990.3C;BraA03g036600.3C;BraA01g037120.3C;BraA09g041760.3C;BraA06g000450.3C;BraA07g022230.3C;BraA02g001830.3C;BraA03g046190.3C;BraA05g000900.3C;BraA03g036560.3C;BraA03g036570.3C;BraA06g009040.3C;BraA05g032470.3C;BraA01g037820.3C;BraA01g021350.3C;BraA02g039080.3C;BraA09g057570.3C;BraA10g014110.3C;BraA08g034970.3C;BraA05g033300.3C;BraA03g036580.3C;BraA03g046180.3C;BraA01g002350.3C;BraA05g0…	0.93414
750	Vitamin B6 metabolism	BraA10g018290.3C;BraA07g030210.3C;BraA08g023560.3C;BraA09g017030.3C;BraA05g040600.3C;BraA08g022000.3C;BraA09g011460.3C;BraA04g000960.3C;BraA04g027090.3C;BraA08g033840.3C;BraA10g024200.3C;BraA02g015910.3C;BraA07g002160.3C;BraA09g017040.3C;BraA08g026050.3C;BraA01g001200.3C;BraA08g021250.3C;BraA06g019640.3C;BraA03g061060.3C;BraA01g036180.3C;BraA03g000050.3C;BraA06g041550.3C;BraA01g044820.3C;BraA07g0…	0.93414
402	Benzoxazinoid biosynthesis	BraA10g004660.3C;BraA10g004670.3C;BraA09g063820.3C;BraA09g063850.3C;BraA10g005320.3C;BraA10g004640.3C;BraA09g063790.3C;BraA03g035560.3C;BraA09g064940.3C;BraA09g063840.3C;BraA09g063800.3C;BraA10g001980.3C;BraA09g051010.3C;BraA04g022080.3C;BraA03g011320.3C;BraA08g034920.3C;BraA10g005330.3C;BraA03g011330.3C;BraA10g001970.3C;BraA04g022070.3C;BraA09g063830.3C	0.98018
900	Terpenoid backbone biosynthesis	BraA06g043410.3C;BraA10g016670.3C;BraA03g018930.3C;BraA01g037230.3C;BraA01g026470.3C;BraA01g037240.3C;BraA06g012860.3C;BraA07g017900.3C;BraA02g006200.3C;BraA09g014810.3C;BraA10g016660.3C;BraA01g025520.3C;BraA09g007410.3C;BraA10g009850.3C;BraA10g030650.3C;BraA03g007480.3C;BraA04g015640.3C;BraA06g026870.3C;BraA03g031130.3C;BraA02g028180.3C;BraA07g041610.3C;BraA03g011740.3C;BraA04g014050.3C;BraA07g0…	0.981991
3015	mRNA surveillance pathway	BraA01g017410.3C;BraA04g027320.3C;BraA09g050640.3C;BraA04g019290.3C;BraA05g037220.3C;BraA08g002480.3C;BraA07g000500.3C;BraA06g038530.3C;BraA09g020300.3C;BraA05g007280.3C;BraA03g013890.3C;BraA02g036740.3C;BraA03g037270.3C;BraA03g022320.3C;BraA07g012830.3C;BraA10g005650.3C;BraA06g013780.3C;BraA02g004930.3C;BraA01g033640.3C;BraA02g028110.3C;BraA02g003690.3C;BraA01g023780.3C;BraA09g057420.3C;BraA10g0…	0.981993
195	Photosynthesis	BraA05g006520.3C;BraA07g042080.3C;BraA01g043130.3C;BraA01g008860.3C;BraA03g025060.3C;BraA07g031170.3C;BraA10g005400.3C;BraA03g006460.3C;BraA09g034540.3C;BraA02g017820.3C;BraA09g032560.3C;BraA03g063100.3C;BraA01g012030.3C;BraA08g018830.3C;BraA08g031860.3C;BraA01g036110.3C;BraA08g000440.3C;BraA08g002230.3C;BraA01g021740.3C;BraA07g018210.3C;BraA10g019740.3C;BraA09g016610.3C;BraA08g008660.3C;BraA06g0…	0.987199
4146	Peroxisome	BraA09g052160.3C;BraA09g044020.3C;BraA03g041240.3C;BraA05g027040.3C;BraA05g038130.3C;BraA06g033920.3C;BraA02g045760.3C;BraA03g032080.3C;BraA09g007420.3C;BraA03g031310.3C;BraA08g025420.3C;BraA10g016840.3C;BraA09g035670.3C;BraA10g009320.3C;BraA04g001370.3C;BraA10g020650.3C;BraA09g062610.3C;BraA05g006110.3C;BraA02g012910.3C;BraA04g020160.3C;BraA09g029790.3C;BraA06g019590.3C;BraA01g034650.3C;BraA09g0…	0.989664
3040	Spliceosome	BraA08g021420.3C;BraA03g032420.3C;BraA04g006110.3C;BraA09g042730.3C;BraA09g049910.3C;BraA09g047470.3C;BraA01g043270.3C;BraA10g023860.3C;BraA01g039720.3C;BraA05g023160.3C;BraA09g012340.3C;BraA04g017550.3C;BraA09g007210.3C;BraA08g024660.3C;BraA10g028850.3C;BraA04g032290.3C;BraA01g028560.3C;BraA04g014480.3C;BraA09g030000.3C;BraA05g037440.3C;BraA03g038430.3C;BraA01g038250.3C;BraA07g023450.3C;BraA04g0…	0.996824
563	Glycosylphosphatidylinositol(GPI)-anchor biosynthesis	BraA09g018400.3C;BraA07g029220.3C;BraA07g036590.3C;BraA05g039980.3C;BraA01g009500.3C;BraA06g006480.3C;BraA10g017680.3C;BraA10g022720.3C;BraA05g016670.3C;BraA01g027010.3C;BraA02g000070.3C;BraA02g009600.3C;BraA09g058400.3C;BraA09g043470.3C;BraA07g023270.3C;BraA02g020800.3C;BraA10g027520.3C;BraA06g037700.3C;BraA05g036540.3C;BraA06g039350.3C;BraA05g040660.3C;BraA08g029690.3C;BraA10g017670.3C;BraA03g0…	0.999129
190	Oxidative phosphorylation	BraA09g010410.3C;BraA01g043960.3C;BraA02g041360.3C;BraA01g000260.3C;BraA02g038260.3C;BraA03g055500.3C;BraA03g037030.3C;BraA01g037720.3C;BraA07g041790.3C;BraA05g004500.3C;BraA07g023390.3C;BraA03g054280.3C;BraA09g024550.3C;BraA02g027190.3C;BraA09g012290.3C;BraA03g059000.3C;BraA09g044180.3C;BraA05g025950.3C;BraA03g045980.3C;BraA08g008850.3C;BraA04g001280.3C;BraA09g025090.3C;BraA09g060540.3C;BraA02g0…	0.99988
3010	Ribosome	BraA06g042320.3C;BraA03g030290.3C;BraA07g022360.3C;BraA02g019380.3C;BraA01g006210.3C;BraA05g012000.3C;BraA09g017860.3C;BraA09g049610.3C;BraA01g040030.3C;BraA03g052740.3C;BraA06g021840.3C;BraA02g019310.3C;BraA09g032140.3C;BraA03g038500.3C;BraA03g058960.3C;BraA01g010210.3C;BraA09g037950.3C;BraA09g022400.3C;BraA03g019610.3C;BraA03g027060.3C;BraA10g018900.3C;BraA03g041610.3C;BraA03g002440.3C;BraA06g0…	1

## Sheet: Table S4
Table S4. GO functional enrichment of the DMGs in s_bud vs. wt_bud.
GO ID	GO Term	GO Function	Genes	p value
GO:0007049	cell cycle	biological_process	BraA06g004650.3C	6.4e-14
GO:0051301	cell division	biological_process	BraA03g036180.3C;BraA07g036290.3C	3.7e-11
GO:0009725	response to hormone	biological_process	BraA03g060940.3C	3.3e-09
GO:0009733	response to auxin	biological_process	BraA04g030840.3C	2.4e-07
GO:0004672	protein kinase activity	molecular_function	BraA09g033890.3C;BraA07g008640.3C;BraA01g036780.3C;BraA01g027640.3C;BraA10g003240.3C;BraA07g020770.3C;BraA08g015160.3C;BraA09g026640.3C;BraA06g028990.3C;BraA06g021640.3C;BraA03g031410.3C;BraA06g013070.3C;BraA06g040870.3C;BraA09g039100.3C;BraA07g005450.3C;BraA01g013530.3C;BraA02g044870.3C;BraA08g009270.3C;BraA03g013200.3C;BraA03g055840.3C;BraA02g020350.3C;BraA06g037210.3C;BraA07g032990.3C;BraA09g0…	2.4948e-06
GO:0009735	response to cytokinin	biological_process	BraA05g017350.3C;BraA02g035240.3C;BraA06g040010.3C;BraA01g025940.3C;BraA02g035250.3C	1.5e-06
GO:0033466	zeatin biosynthesis process	biological_process	BraA06g040680.3C;BraA09g015650.3C	2.9e-05
GO:0007165	signal transduction	biological_process	BraA09g045610.3C;BraA04g018390.3C;BraA02g024350.3C;BraA01g031140.3C;BraA07g021140.3C;BraA07g038150.3C;BraA06g014290.3C;BraA02g022150.3C;BraA01g027260.3C;BraA07g028420.3C;BraA09g057510.3C;BraA03g031710.3C;BraA09g012040.3C;BraA06g013610.3C;BraA07g028410.3C;BraA09g056420.3C;BraA04g005140.3C;BraA05g004610.3C;BraA09g057610.3C;BraA09g063380.3C;BraA03g038030.3C;BraA05g029960.3C;BraA07g027490.3C;BraA09g0…	8.93168e-05
GO:0001709	cell fate determination	biological_process	BraA09g020380.3C;BraA10g002310.3C;BraA05g034410.3C	0.000879662
GO:0000148	1,3-beta-D-glucan synthase complex	cellular_component	BraA02g004600.3C;BraA09g063900.3C;BraA07g006320.3C;BraA05g012120.3C;BraA09g002640.3C;BraA05g038460.3C;BraA09g025290.3C;BraA10g025720.3C;BraA05g012170.3C;BraA05g008500.3C;BraA09g016710.3C;BraA09g010050.3C;BraA06g017530.3C;BraA07g023720.3C;BraA10g005220.3C;BraA10g004390.3C;BraA01g041620.3C;BraA04g017660.3C;BraA09g002650.3C;BraA05g012150.3C;BraA03g033140.3C;BraA05g032510.3C	0.0011297
GO:0004722	protein serine/threonine phosphatase activity	molecular_function	BraA07g042530.3C;BraA10g007890.3C;BraA01g042130.3C;BraA05g030470.3C;BraA10g016990.3C;BraA09g040670.3C;BraA05g000950.3C;BraA05g022160.3C;BraA05g030230.3C;BraA08g001390.3C;BraA01g035550.3C;BraA01g007970.3C;BraA09g008010.3C;BraA10g006280.3C;BraA09g063330.3C;BraA04g000760.3C;BraA03g058350.3C;BraA06g004770.3C;BraA03g036870.3C;BraA10g005820.3C;BraA06g027310.3C;BraA09g027290.3C;BraA05g018520.3C;BraA09g0…	0.00638886
GO:0000911	cytokinesis by cell plate formation	biological_process	BraA04g001540.3C;BraA06g018170.3C;BraA10g027050.3C;BraA07g020830.3C;BraA10g012510.3C;BraA04g014650.3C;BraA06g007350.3C;BraA04g001090.3C;BraA02g013900.3C;BraA03g028760.3C;BraA03g003210.3C;BraA03g029920.3C;BraA06g004080.3C;BraA06g023810.3C;BraA04g030710.3C;BraA10g021440.3C;BraA01g028670.3C;BraA02g037520.3C;BraA03g016210.3C;BraA06g018250.3C;BraA05g011800.3C;BraA09g050490.3C;BraA03g017470.3C;BraA06g0…	0.00677746
GO:0003964	RNA-directed DNA polymerase activity	molecular_function	BraA09g056330.3C;BraA04g000200.3C;BraA03g064940.3C;BraA04g003950.3C;BraA03g031330.3C;BraA04g017390.3C;BraA09g008750.3C;BraA02g020520.3C;BraA04g009900.3C;BraA06g026590.3C;BraA09g037380.3C;BraA04g006880.3C;BraA05g012160.3C;BraA06g016470.3C;BraA03g056870.3C;BraA06g001000.3C;BraA03g045790.3C;BraA06g010600.3C;BraA07g006480.3C;BraA05g012070.3C;BraA02g036680.3C;BraA05g026420.3C;BraA09g017970.3C;BraA03g0…	0.00775391
GO:0005623	cell	cellular_component	BraA03g060560.3C;BraA02g034120.3C;BraA09g022830.3C;BraA07g033210.3C;BraA06g044100.3C;BraA09g043620.3C;BraA08g016200.3C;BraA08g024840.3C;BraA09g046300.3C;BraA01g001650.3C;BraA03g058610.3C;BraA06g041020.3C;BraA06g038810.3C;BraA09g016060.3C;BraA09g036990.3C	0.00979194
GO:0000118	histone deacetylase complex	cellular_component	BraA07g034920.3C;BraA01g044910.3C;BraA07g030100.3C;BraA09g017520.3C;BraA03g006590.3C;BraA03g061520.3C;BraA06g007280.3C;BraA02g019570.3C;BraA05g005660.3C;BraA02g019530.3C;BraA09g010130.3C;BraA04g031940.3C;BraA01g043010.3C;BraA10g024310.3C;BraA05g015480.3C;BraA02g005820.3C;BraA01g027830.3C;BraA05g015490.3C;BraA08g017010.3C;BraA02g019540.3C;BraA07g030090.3C	0.0101127
GO:0000145	exocyst	cellular_component	BraA02g005230.3C;BraA02g000970.3C;BraA10g008300.3C;BraA10g017560.3C;BraA10g024960.3C;BraA07g029420.3C;BraA07g018980.3C;BraA06g016620.3C;BraA10g006440.3C;BraA05g032980.3C;BraA03g034290.3C;BraA10g017570.3C;BraA01g040700.3C;BraA07g029120.3C;BraA03g011890.3C;BraA10g008830.3C;BraA10g032580.3C;BraA05g006590.3C;BraA02g011610.3C;BraA05g006600.3C;BraA05g036390.3C;BraA03g056700.3C;BraA03g033800.3C;BraA04g0…	0.0109831
GO:0004674	protein serine/threonine kinase activity	molecular_function	BraA03g049520.3C;BraA01g031150.3C;BraA05g017100.3C;BraA06g019390.3C;BraA03g040360.3C;BraA03g025970.3C;BraA09g007020.3C;BraA10g033320.3C;BraA03g033560.3C;BraA06g035220.3C;BraA02g030060.3C;BraA03g032000.3C;BraA09g027010.3C;BraA09g015980.3C;BraA06g007520.3C;BraA09g021970.3C;BraA05g016050.3C;BraA05g019300.3C;BraA03g000100.3C;BraA09g053910.3C;BraA07g039310.3C;BraA05g013300.3C;BraA01g013740.3C;BraA10g0…	0.0136687
GO:0005198	structural molecule activity	molecular_function	BraA10g008370.3C;BraA03g026060.3C;BraA07g004600.3C;BraA09g034390.3C;BraA02g014020.3C;BraA08g014910.3C;BraA03g029410.3C;BraA08g032030.3C;BraA06g002820.3C;BraA03g030160.3C;BraA03g023580.3C;BraA06g038510.3C;BraA07g023190.3C;BraA09g025170.3C;BraA03g056630.3C;BraA01g012170.3C;BraA06g041270.3C;BraA01g000530.3C;BraA02g001150.3C;BraA05g006070.3C;BraA01g039770.3C;BraA09g043830.3C;BraA02g014140.3C;BraA06g0…	0.0177509
GO:0005506	iron ion binding	molecular_function	BraA10g027310.3C;BraA03g052520.3C;BraA07g038840.3C;BraA07g027860.3C;BraA04g004330.3C;BraA06g011600.3C;BraA09g044280.3C;BraA01g001520.3C;BraA05g028300.3C;BraA03g038810.3C;BraA04g008320.3C;BraA01g039750.3C;BraA03g001990.3C;BraA05g020440.3C;BraA03g038630.3C;BraA05g028290.3C;BraA05g032540.3C;BraA10g000700.3C;BraA10g010400.3C;BraA09g020930.3C;BraA01g006340.3C;BraA01g001530.3C;BraA08g014280.3C;BraA06g0…	0.0179887
GO:0004124	cysteine synthase activity	molecular_function	BraA04g031460.3C;BraA01g021750.3C;BraA05g003800.3C;BraA09g004820.3C;BraA04g001180.3C;BraA08g010980.3C;BraA04g001190.3C;BraA01g043580.3C;BraA09g050980.3C;BraA03g031910.3C;BraA06g034250.3C;BraA02g040540.3C;BraA04g002260.3C	0.018147
GO:0005794	Golgi apparatus	cellular_component	BraA01g014060.3C;BraA05g037290.3C;BraA06g002780.3C;BraA09g058970.3C;BraA06g040530.3C;BraA07g011290.3C;BraA09g030450.3C;BraA03g017970.3C;BraA03g042900.3C;BraA01g021400.3C;BraA06g039400.3C;BraA08g030330.3C;BraA08g001840.3C;BraA01g044360.3C;BraA03g013840.3C;BraA01g018250.3C;BraA09g049450.3C;BraA04g026930.3C;BraA09g027540.3C;BraA08g004130.3C;BraA03g018080.3C;BraA09g019280.3C;BraA06g011070.3C;BraA08g0…	0.0201829
GO:0005886	plasma membrane	cellular_component	BraA02g017230.3C;BraA09g030310.3C;BraA07g021920.3C;BraA06g008540.3C;BraA10g032050.3C;BraA10g016070.3C;BraA06g009920.3C;BraA08g017760.3C;BraA03g055300.3C;BraA02g005950.3C;BraA06g043310.3C;BraA06g030640.3C;BraA06g013930.3C;BraA09g028180.3C;BraA03g008980.3C;BraA07g020070.3C;BraA07g019470.3C;BraA06g005340.3C;BraA03g055620.3C;BraA04g008190.3C;BraA05g005230.3C;BraA03g030560.3C;BraA03g033240.3C;BraA07g0…	0.02026
GO:0004028	3-chloroallyl aldehyde dehydrogenase activity	molecular_function	BraA06g024290.3C;BraA08g005910.3C;BraA05g038790.3C;BraA01g002390.3C;BraA09g039480.3C;BraA01g004020.3C;BraA07g028040.3C;BraA03g041190.3C;BraA08g021050.3C;BraA02g025290.3C;BraA09g010060.3C;BraA05g020840.3C;BraA06g024330.3C;BraA07g042400.3C;BraA08g026360.3C;BraA03g059920.3C;BraA06g024280.3C;BraA06g018870.3C	0.0224252
GO:0004175	endopeptidase activity	molecular_function	BraA04g009830.3C;BraA02g010160.3C;BraA08g031320.3C;BraA04g021650.3C;BraA09g000340.3C;BraA03g018930.3C;BraA06g006620.3C;BraA01g041740.3C;BraA09g036370.3C;BraA02g029370.3C;BraA03g029910.3C;BraA06g007420.3C;BraA08g032460.3C;BraA08g011470.3C;BraA03g016220.3C;BraA03g046520.3C;BraA09g017330.3C;BraA02g029340.3C	0.0224252
GO:0004564	beta-fructofuranosidase activity	molecular_function	BraA02g009820.3C;BraA08g015640.3C;BraA03g061860.3C;BraA07g036450.3C;BraA01g042340.3C;BraA03g026930.3C;BraA10g018900.3C;BraA05g021880.3C;BraA08g007970.3C;BraA01g003470.3C;BraA05g038930.3C;BraA09g040380.3C	0.024704
GO:0003774	motor activity	molecular_function	BraA10g012420.3C;BraA01g008800.3C;BraA09g020070.3C;BraA03g039130.3C;BraA08g022840.3C;BraA02g008900.3C;BraA09g057680.3C;BraA01g018110.3C;BraA08g034820.3C;BraA04g002800.3C;BraA02g014010.3C;BraA01g004760.3C;BraA03g009650.3C;BraA08g034810.3C;BraA03g057770.3C;BraA07g023300.3C;BraA09g065040.3C;BraA09g013330.3C;BraA07g000540.3C;BraA02g014660.3C;BraA05g027380.3C;BraA03g016990.3C;BraA06g003350.3C;BraA10g0…	0.0249242
GO:0005388	calcium-transporting ATPase activity	molecular_function	BraA01g016730.3C;BraA02g036840.3C;BraA01g031260.3C;BraA05g038260.3C;BraA08g021580.3C;BraA02g012500.3C;BraA09g063100.3C;BraA05g024290.3C;BraA09g054470.3C;BraA03g055330.3C;BraA01g016760.3C;BraA10g014990.3C;BraA03g039650.3C;BraA01g032470.3C;BraA05g025950.3C;BraA03g060900.3C;BraA01g007830.3C;BraA09g000940.3C;BraA08g010240.3C;BraA07g002320.3C;BraA07g022810.3C;BraA09g063220.3C	0.0278723
GO:0005216	ion channel activity	molecular_function	BraA04g018100.3C;BraA10g027400.3C;BraA01g027270.3C;BraA07g023290.3C;BraA01g023630.3C;BraA01g028180.3C;BraA10g011490.3C;BraA03g060170.3C;BraA03g029750.3C;BraA03g029180.3C;BraA01g027550.3C;BraA10g013620.3C;BraA05g029910.3C;BraA06g000100.3C;BraA05g001360.3C;BraA10g024360.3C;BraA01g007370.3C;BraA02g014790.3C;BraA03g013320.3C;BraA05g029920.3C;BraA03g004310.3C;BraA10g024010.3C;BraA06g012030.3C;BraA03g0…	0.0323392
GO:0000059	protein import into nucleus, docking	biological_process	BraA07g017750.3C;BraA03g016880.3C;BraA04g002520.3C;BraA02g008450.3C;BraA02g018880.3C;BraA05g022950.3C;BraA10g011810.3C;BraA04g003070.3C;BraA02g030510.3C;BraA03g053790.3C;BraA07g004130.3C;BraA02g030520.3C;BraA07g012990.3C;BraA10g028840.3C;BraA10g022870.3C;BraA03g034080.3C;BraA02g012550.3C;BraA09g019640.3C;BraA05g012990.3C;BraA05g001300.3C;BraA09g010730.3C;BraA05g037330.3C;BraA02g001900.3C;BraA01g0…	0.0323392
GO:0004565	beta-galactosidase activity	molecular_function	BraA06g027250.3C;BraA03g024900.3C;BraA03g059130.3C;BraA02g044310.3C;BraA07g003230.3C;BraA01g035750.3C;BraA01g003370.3C;BraA07g023840.3C;BraA07g021190.3C;BraA04g023630.3C;BraA07g023580.3C;BraA01g002360.3C;BraA03g043310.3C;BraA07g025600.3C;BraA05g023380.3C;BraA07g012160.3C;BraA02g012650.3C;BraA08g005650.3C;BraA07g018830.3C;BraA05g023360.3C;BraA01g037810.3C;BraA07g028960.3C;BraA04g006680.3C;BraA07g0…	0.0327591
GO:0004506	squalene monooxygenase activity	molecular_function	BraA01g001230.3C;BraA02g042300.3C;BraA09g056220.3C;BraA06g031540.3C;BraA09g017900.3C;BraA02g042310.3C;BraA04g007810.3C;BraA06g031530.3C;BraA09g006230.3C;BraA04g016830.3C;BraA02g042320.3C	0.0336299
GO:0003883	CTP synthase activity	molecular_function	BraA03g049260.3C;BraA01g011390.3C;BraA05g034420.3C;BraA03g035440.3C;BraA09g034170.3C;BraA02g026870.3C;BraA07g010340.3C;BraA07g007920.3C;BraA05g010180.3C;BraA01g038730.3C	0.0457804
GO:0004144	diacylglycerol O-acyltransferase activity	molecular_function	BraA03g045590.3C;BraA03g020610.3C;BraA02g020740.3C;BraA09g011830.3C;BraA03g014500.3C;BraA01g044750.3C;BraA02g020720.3C;BraA05g006760.3C;BraA05g014990.3C;BraA01g022340.3C;BraA07g001370.3C;BraA02g014610.3C;BraA03g065310.3C;BraA03g020600.3C;BraA04g030440.3C	0.0487799
GO:0005096	GTPase activator activity	molecular_function	BraA03g059540.3C;BraA04g019750.3C;BraA10g003380.3C;BraA03g049460.3C;BraA03g005680.3C;BraA09g001250.3C;BraA02g015240.3C;BraA10g020930.3C;BraA10g020980.3C;BraA09g037580.3C;BraA09g007010.3C;BraA05g037810.3C;BraA05g035410.3C;BraA10g026150.3C;BraA10g025460.3C;BraA04g028420.3C;BraA03g063460.3C;BraA02g008110.3C;BraA08g034650.3C;BraA09g024880.3C;BraA02g006270.3C;BraA05g001140.3C;BraA02g043330.3C;BraA06g0…	0.0523175
GO:0005768	endosome	cellular_component	BraA09g002860.3C;BraA09g035240.3C;BraA03g047160.3C;BraA08g023270.3C;BraA06g015250.3C;BraA07g022520.3C;BraA06g039270.3C;BraA10g021820.3C;BraA02g004410.3C;BraA07g025100.3C;BraA10g025330.3C;BraA08g030950.3C;BraA04g004260.3C;BraA01g005650.3C;BraA02g009060.3C;BraA02g041740.3C;BraA10g019960.3C;BraA05g035940.3C;BraA05g028890.3C;BraA01g005460.3C;BraA01g032520.3C;BraA07g010540.3C;BraA07g007490.3C;BraA03g0…	0.0533435
GO:0003755	peptidyl-prolyl cis-trans isomerase activity	molecular_function	BraA04g022020.3C;BraA02g024780.3C;BraA01g005640.3C;BraA09g045580.3C;BraA02g013430.3C;BraA09g008630.3C;BraA07g002670.3C;BraA01g032890.3C;BraA04g001860.3C;BraA06g029970.3C;BraA03g041520.3C;BraA09g043260.3C;BraA01g003460.3C;BraA03g045840.3C;BraA05g038590.3C;BraA02g014500.3C;BraA09g021440.3C;BraA02g009520.3C;BraA01g032790.3C	0.0553974
GO:0005634	nucleus	cellular_component	BraA01g043500.3C;BraA10g017390.3C;BraA02g010990.3C;BraA09g001970.3C;BraA02g020940.3C;BraA07g015510.3C;BraA03g040690.3C;BraA01g014220.3C;BraA07g028510.3C;BraA07g018080.3C;BraA07g013970.3C;BraA09g014570.3C;BraA03g044410.3C;BraA01g036720.3C;BraA07g011950.3C;BraA01g010120.3C;BraA03g044530.3C;BraA05g029030.3C;BraA02g015160.3C;BraA02g040820.3C;BraA02g030470.3C;BraA06g043900.3C;BraA03g027820.3C;BraA10g0…	0.0570847
GO:0003006	developmental process involved in reproduction	biological_process	BraA01g014850.3C;BraA03g051660.3C;BraA03g047520.3C;BraA08g020980.3C;BraA07g043190.3C;BraA01g019200.3C;BraA02g024370.3C;BraA10g011880.3C;BraA06g011390.3C	0.0623203
GO:0003840	gamma-glutamyltransferase activity	molecular_function	BraA01g008390.3C;BraA03g054970.3C;BraA01g000550.3C;BraA08g022350.3C;BraA03g054990.3C;BraA01g000570.3C;BraA06g044240.3C;BraA03g054980.3C;BraA06g044230.3C	0.0623203
GO:0003865	3-oxo-5-alpha-steroid 4-dehydrogenase activity	molecular_function	BraA04g026970.3C;BraA07g015220.3C;BraA09g010500.3C;BraA03g007270.3C;BraA03g043190.3C;BraA02g006300.3C;BraA03g043180.3C;BraA09g046170.3C;BraA10g023600.3C	0.0623203
GO:0005313	L-glutamate transmembrane transporter activity	molecular_function	BraA09g017950.3C;BraA06g027750.3C;BraA03g061990.3C;BraA06g006910.3C;BraA09g057960.3C;BraA01g027470.3C;BraA09g062080.3C;BraA09g008200.3C;BraA06g006890.3C	0.0623203
GO:0004791	thioredoxin-disulfide reductase activity	molecular_function	BraA02g035190.3C;BraA08g020810.3C;BraA09g010890.3C;BraA01g006060.3C;BraA04g006180.3C;BraA09g062190.3C;BraA03g022020.3C;BraA03g059420.3C;BraA09g062180.3C;BraA04g006190.3C;BraA04g012150.3C;BraA09g010880.3C;BraA06g030500.3C;BraA04g006200.3C	0.0628669
GO:0004497	monooxygenase activity	molecular_function	BraA05g005310.3C;BraA07g019510.3C;BraA03g044300.3C;BraA06g044820.3C;BraA02g017400.3C;BraA03g046420.3C;BraA03g036580.3C;BraA02g039080.3C;BraA01g001500.3C;BraA03g046180.3C;BraA06g008630.3C;BraA09g015770.3C;BraA05g005260.3C;BraA08g017020.3C;BraA06g032230.3C;BraA02g017420.3C;BraA03g036550.3C;BraA05g000910.3C;BraA01g037120.3C;BraA04g014320.3C;BraA08g011400.3C;BraA02g015360.3C;BraA09g003910.3C;BraA04g0…	0.067223
GO:0005524	ATP binding	molecular_function	BraA06g039500.3C;BraA09g017180.3C;BraA01g030690.3C;BraA02g032830.3C;BraA10g013480.3C;BraA01g014000.3C;BraA09g017710.3C;BraA05g031760.3C;BraA07g039440.3C;BraA10g007070.3C;BraA03g016790.3C;BraA06g036950.3C;BraA09g016380.3C;BraA05g013780.3C;BraA02g042910.3C;BraA02g015060.3C;BraA06g044440.3C;BraA05g041330.3C;BraA09g003520.3C;BraA02g037420.3C;BraA10g027230.3C;BraA04g025910.3C;BraA03g039680.3C;BraA07g0…	0.0672904
GO:0002213	defense response to insect	biological_process	BraA05g003770.3C;BraA03g050740.3C;BraA10g024810.3C;BraA09g054350.3C;BraA04g021050.3C;BraA01g013720.3C;BraA06g018410.3C;BraA02g038290.3C;BraA09g003560.3C;BraA02g012430.3C;BraA06g024580.3C;BraA03g012530.3C;BraA06g036860.3C;BraA04g004250.3C;BraA07g039330.3C;BraA02g038280.3C;BraA03g050750.3C;BraA10g015140.3C	0.0691887
GO:0000502	proteasome complex	cellular_component	BraA02g025160.3C;BraA01g015570.3C;BraA08g001360.3C;BraA04g019400.3C;BraA03g052080.3C;BraA05g015830.3C;BraA03g054490.3C;BraA10g027920.3C;BraA02g003230.3C;BraA03g009350.3C;BraA01g031860.3C;BraA05g016620.3C;BraA03g007650.3C;BraA09g006520.3C;BraA03g014400.3C;BraA06g044010.3C;BraA07g000250.3C;BraA09g018670.3C;BraA02g030360.3C;BraA06g017260.3C;BraA07g007040.3C;BraA02g014630.3C;BraA06g044760.3C;BraA08g0…	0.0693279
GO:0005345	purine nucleobase transmembrane transporter activity	molecular_function	BraA06g015320.3C;BraA04g017760.3C;BraA01g022180.3C;BraA05g020520.3C;BraA08g012840.3C;BraA07g039030.3C;BraA09g036510.3C;BraA10g007650.3C;BraA09g029330.3C;BraA08g028110.3C;BraA06g015290.3C;BraA08g024450.3C;BraA08g012820.3C;BraA09g034100.3C;BraA06g006770.3C;BraA08g012810.3C;BraA08g012830.3C;BraA09g034060.3C;BraA06g015300.3C;BraA07g011800.3C;BraA01g009720.3C;BraA01g027140.3C	0.0706511
GO:0003993	acid phosphatase activity	molecular_function	BraA08g018620.3C;BraA01g017190.3C;BraA09g059970.3C;BraA02g031000.3C;BraA09g011240.3C;BraA06g043410.3C;BraA08g035080.3C;BraA01g041630.3C;BraA04g019310.3C;BraA09g065090.3C;BraA05g036550.3C;BraA08g009450.3C;BraA09g043870.3C;BraA09g010460.3C;BraA06g010040.3C;BraA03g043130.3C;BraA03g043100.3C;BraA02g012470.3C;BraA08g010990.3C;BraA03g017330.3C;BraA01g008360.3C;BraA06g040030.3C;BraA05g006160.3C;BraA04g0…	0.0771795
GO:0001666	response to hypoxia	biological_process	BraA02g012310.3C;BraA09g013710.3C;BraA06g008210.3C;BraA02g044300.3C;BraA07g014210.3C;BraA09g055170.3C;BraA04g012330.3C;BraA03g001290.3C;BraA06g002870.3C;BraA08g019880.3C;BraA05g032790.3C;BraA07g004830.3C;BraA10g007920.3C;BraA08g029330.3C;BraA01g033450.3C;BraA02g038430.3C;BraA06g027220.3C;BraA01g037630.3C;BraA01g042360.3C;BraA07g027070.3C;BraA06g034940.3C;BraA02g040860.3C;BraA05g020970.3C;BraA09g0…	0.0784526
GO:0004693	cyclin-dependent protein serine/threonine kinase activity	molecular_function	BraA03g000520.3C;BraA09g001110.3C;BraA09g041350.3C;BraA05g020670.3C;BraA05g013490.3C;BraA07g037720.3C;BraA06g035450.3C;BraA04g005220.3C;BraA09g007930.3C;BraA04g005640.3C;BraA10g027420.3C;BraA09g054820.3C;BraA02g045200.3C;BraA10g027610.3C;BraA04g020030.3C;BraA09g008650.3C;BraA03g045010.3C;BraA02g031590.3C;BraA04g016470.3C;BraA03g060890.3C;BraA06g042650.3C;BraA08g005310.3C;BraA01g023270.3C;BraA04g0…	0.0837095
GO:0004031	aldehyde oxidase activity	molecular_function	BraA06g022060.3C;BraA06g023170.3C;BraA06g022070.3C;BraA10g019670.3C;BraA06g022080.3C;BraA10g003130.3C;BraA04g019480.3C;BraA02g009250.3C	0.0848352
GO:0006886	intracellular protein transport	biological_process	BraA03g037270.3C;BraA03g060100.3C;BraA08g021170.3C;BraA08g011370.3C;BraA03g051310.3C;BraA05g017790.3C;BraA01g036250.3C;BraA09g016590.3C	0.0848352
GO:0002184	cytoplasmic translational termination	biological_process	BraA09g052440.3C;BraA07g007130.3C;BraA03g026490.3C;BraA09g057420.3C;BraA01g023750.3C;BraA06g013780.3C;BraA08g028930.3C;BraA04g000230.3C	0.0848352
GO:0004742	dihydrolipoyllysine-residue acetyltransferase activity	molecular_function	BraA06g038650.3C;BraA09g024590.3C;BraA03g004660.3C;BraA09g043410.3C;BraA03g036210.3C;BraA09g030850.3C;BraA06g000770.3C;BraA05g033100.3C	0.0848352
GO:0003978	UDP-glucose 4-epimerase activity	molecular_function	BraA09g014370.3C;BraA01g014620.3C;BraA09g027620.3C;BraA03g051560.3C;BraA06g009010.3C;BraA08g030770.3C;BraA03g062300.3C;BraA09g012980.3C	0.0848352
GO:0016491	oxidoreductase activity	molecular_function	BraA09g014190.3C;BraA09g026130.3C;BraA05g014850.3C;BraA07g031940.3C;BraA03g000760.3C;BraA03g024760.3C;BraA05g015970.3C;BraA09g013940.3C;BraA03g051640.3C;BraA02g037110.3C;BraA04g020970.3C;BraA09g063320.3C;BraA05g014830.3C;BraA05g035900.3C;BraA02g006280.3C;BraA01g014780.3C;BraA10g033110.3C	0.0860853
GO:0003955	NAD(P)H dehydrogenase (quinone) activity	molecular_function	BraA04g002700.3C;BraA10g003360.3C;BraA01g017290.3C;BraA03g060260.3C;BraA08g020640.3C;BraA03g021730.3C;BraA08g013680.3C;BraA07g005830.3C;BraA09g038870.3C;BraA01g018020.3C;BraA01g002070.3C;BraA10g010820.3C;BraA09g032080.3C;BraA02g035690.3C;BraA08g006270.3C;BraA02g011420.3C;BraA10g012610.3C;BraA02g013870.3C;BraA10g022640.3C;BraA03g013910.3C;BraA04g007120.3C	0.0861085
GO:0005737	cytoplasm	cellular_component	BraA07g041350.3C;BraA08g021820.3C;BraA01g011560.3C;BraA05g031510.3C;BraA06g029650.3C;BraA06g002400.3C;BraA02g018100.3C;BraA07g028430.3C;BraA09g020590.3C;BraA03g014740.3C;BraA06g010260.3C;BraA09g046200.3C;BraA04g005800.3C;BraA06g018310.3C;BraA09g018070.3C;BraA07g002510.3C;BraA03g011330.3C;BraA02g004810.3C;BraA02g016690.3C;BraA09g060160.3C;BraA09g043670.3C;BraA05g027920.3C;BraA06g025940.3C;BraA03g0…	0.0866867
GO:0000155	phosphorelay sensor kinase activity	molecular_function	BraA05g000390.3C;BraA09g037160.3C;BraA02g003560.3C;BraA02g011790.3C;BraA06g040070.3C;BraA10g002840.3C;BraA06g023540.3C;BraA03g004430.3C;BraA06g039700.3C;BraA08g034940.3C;BraA03g012050.3C;BraA07g012270.3C;BraA03g004420.3C;BraA06g006450.3C;BraA03g041900.3C;BraA01g009650.3C;BraA05g030340.3C;BraA09g062320.3C;BraA04g008010.3C;BraA08g018740.3C;BraA08g022570.3C;BraA10g016140.3C;BraA07g003100.3C;BraA05g0…	0.100162
GO:0004842	ubiquitin-protein transferase activity	molecular_function	BraA05g014760.3C;BraA05g006140.3C;BraA09g059460.3C;BraA08g003960.3C;BraA10g028210.3C;BraA04g016020.3C;BraA04g001220.3C;BraA01g042100.3C;BraA09g036820.3C;BraA09g005810.3C;BraA09g010760.3C;BraA08g030100.3C;BraA08g023920.3C;BraA04g018750.3C;BraA09g017790.3C;BraA03g039780.3C;BraA05g013810.3C;BraA06g028100.3C;BraA02g038680.3C;BraA09g045680.3C;BraA05g039090.3C;BraA08g025110.3C;BraA02g017700.3C;BraA02g0…	0.102224
GO:0004784	superoxide dismutase activity	molecular_function	BraA10g009320.3C;BraA03g015660.3C;BraA10g006220.3C;BraA06g030740.3C;BraA01g015820.3C;BraA03g015650.3C;BraA10g021990.3C;BraA05g035880.3C;BraA09g062610.3C;BraA04g020160.3C;BraA01g039910.3C;BraA09g006630.3C	0.103388
GO:0005315	inorganic phosphate transmembrane transporter activity	molecular_function	BraA09g019770.3C;BraA09g000620.3C;BraA05g014530.3C;BraA06g043800.3C;BraA06g019930.3C;BraA09g002880.3C;BraA04g025580.3C;BraA06g043770.3C;BraA02g008870.3C;BraA09g019840.3C;BraA04g026980.3C;BraA03g013730.3C;BraA02g030600.3C;BraA02g030590.3C;BraA09g045520.3C;BraA02g030630.3C;BraA09g019510.3C;BraA09g019760.3C;BraA03g030140.3C;BraA02g013650.3C;BraA05g006850.3C;BraA02g030610.3C;BraA04g005250.3C;BraA05g0…	0.104537
GO:0004630	phospholipase D activity	molecular_function	BraA05g017670.3C;BraA03g027680.3C;BraA08g007450.3C;BraA03g027700.3C;BraA01g042490.3C;BraA03g059700.3C;BraA06g000720.3C;BraA05g030480.3C;BraA08g002130.3C;BraA06g032680.3C;BraA03g027710.3C;BraA10g000160.3C;BraA09g026730.3C;BraA02g013710.3C;BraA03g040130.3C;BraA02g026380.3C	0.106665
GO:0003825	alpha,alpha-trehalose-phosphate synthase (UDP-forming) activity	molecular_function	BraA08g033930.3C;BraA03g047730.3C;BraA10g005140.3C;BraA01g028060.3C;BraA06g012810.3C;BraA07g041670.3C;BraA10g005120.3C;BraA03g053750.3C;BraA10g005130.3C;BraA03g061490.3C;BraA09g011560.3C;BraA09g039370.3C;BraA10g005150.3C;BraA08g026340.3C;BraA06g012820.3C;BraA02g024760.3C	0.106665
GO:0004843	thiol-dependent ubiquitin-specific protease activity	molecular_function	BraA02g011920.3C;BraA03g051950.3C;BraA04g028980.3C;BraA08g022060.3C;BraA05g035030.3C;BraA03g039460.3C;BraA01g006860.3C;BraA03g036410.3C;BraA05g032660.3C;BraA01g015340.3C;BraA08g012650.3C;BraA07g031710.3C;BraA08g002460.3C;BraA05g026580.3C;BraA03g012130.3C;BraA10g029290.3C;BraA07g021720.3C;BraA03g010090.3C;BraA02g003620.3C;BraA10g029340.3C;BraA05g035020.3C;BraA03g035020.3C;BraA03g047550.3C;BraA01g0…	0.112878
GO:0000304	response to singlet oxygen	biological_process	BraA03g058010.3C;BraA08g024860.3C;BraA08g016500.3C;BraA09g003490.3C;BraA01g026880.3C;BraA03g058190.3C;BraA06g036930.3C	0.115483
GO:0003885	D-arabinono-1,4-lactone oxidase activity	molecular_function	BraA10g014340.3C;BraA02g003980.3C;BraA05g001100.3C;BraA06g019070.3C;BraA02g012830.3C;BraA05g001110.3C;BraA05g001120.3C	0.115483
GO:0004607	phosphatidylcholine-sterol O-acyltransferase activity	molecular_function	BraA10g002570.3C;BraA09g065120.3C;BraA07g012090.3C;BraA02g005020.3C;BraA01g011100.3C;BraA03g048950.3C;BraA10g025210.3C	0.115483
GO:0000003	reproduction	biological_process	BraA01g032910.3C;BraA05g026440.3C;BraA05g026410.3C;BraA08g015660.3C;BraA05g026450.3C;BraA02g009540.3C;BraA08g022810.3C	0.115483
GO:0004301	epoxide hydrolase activity	molecular_function	BraA09g001820.3C;BraA03g045370.3C;BraA05g039670.3C;BraA04g019330.3C;BraA09g042250.3C;BraA03g046630.3C;BraA01g022650.3C	0.115483
GO:0003985	acetyl-CoA C-acetyltransferase activity	molecular_function	BraA09g022910.3C;BraA09g026740.3C;BraA02g034210.3C;BraA06g035730.3C;BraA02g039500.3C;BraA09g004100.3C;BraA02g028120.3C	0.115483
GO:0016021	integral component of membrane	cellular_component	BraA06g014650.3C;BraA10g005870.3C;BraA02g036520.3C;BraA07g004740.3C;BraA02g031670.3C;BraA08g019910.3C;BraA07g028100.3C;BraA02g027250.3C;BraA01g028300.3C;BraA09g007860.3C;BraA01g021160.3C;BraA07g011790.3C;BraA03g029690.3C;BraA05g008740.3C;BraA02g012800.3C;BraA01g024490.3C;BraA01g021910.3C;BraA09g000920.3C;BraA04g015890.3C;BraA06g018070.3C;BraA06g038390.3C;BraA07g021020.3C;BraA07g041850.3C;BraA08g0…	0.134665
GO:0005516	calmodulin binding	molecular_function	BraA03g012990.3C;BraA07g032650.3C;BraA07g008080.3C;BraA01g040610.3C;BraA04g006660.3C;BraA05g007090.3C;BraA01g019360.3C;BraA07g003540.3C;BraA06g025540.3C;BraA03g037560.3C;BraA02g012560.3C;BraA06g022270.3C;BraA06g010540.3C;BraA08g015240.3C;BraA09g061390.3C;BraA09g016310.3C;BraA02g027180.3C;BraA02g038720.3C;BraA04g024180.3C;BraA07g019800.3C;BraA02g035790.3C;BraA10g014250.3C;BraA03g050670.3C;BraA03g0…	0.140937
GO:0004177	aminopeptidase activity	molecular_function	BraA10g014780.3C;BraA01g006840.3C;BraA08g000190.3C;BraA01g004910.3C;BraA03g026290.3C;BraA03g049350.3C;BraA09g053860.3C;BraA05g039860.3C;BraA08g030570.3C;BraA02g005200.3C;BraA05g002410.3C;BraA01g001760.3C;BraA05g004970.3C;BraA08g016750.3C;BraA01g008120.3C;BraA07g024660.3C;BraA01g011620.3C;BraA10g031690.3C;BraA08g032730.3C;BraA06g038780.3C;BraA01g002060.3C;BraA04g017740.3C	0.141619
GO:0004252	serine-type endopeptidase activity	molecular_function	BraA04g012220.3C;BraA07g037980.3C;BraA02g028690.3C;BraA02g011410.3C;BraA03g053060.3C;BraA05g032780.3C;BraA02g035990.3C;BraA10g017020.3C;BraA01g011480.3C;BraA01g025990.3C;BraA03g049510.3C;BraA09g003510.3C;BraA09g011770.3C;BraA02g038940.3C;BraA06g040540.3C;BraA06g043010.3C;BraA06g020050.3C;BraA09g032250.3C;BraA04g021450.3C;BraA09g009030.3C;BraA04g019100.3C;BraA03g025680.3C;BraA05g028810.3C;BraA07g0…	0.147221
GO:0005215	transporter activity	molecular_function	BraA04g005350.3C;BraA06g042080.3C;BraA03g044730.3C;BraA01g032090.3C;BraA07g017760.3C;BraA02g020790.3C;BraA08g014300.3C;BraA09g021580.3C;BraA10g006730.3C;BraA03g042080.3C;BraA05g007130.3C;BraA10g024860.3C;BraA03g045660.3C;BraA09g045420.3C;BraA01g018800.3C;BraA05g012020.3C;BraA02g020270.3C;BraA07g030190.3C;BraA09g066210.3C;BraA05g031010.3C;BraA02g005730.3C;BraA09g005860.3C;BraA05g006040.3C;BraA03g0…	0.151765
GO:0008152	metabolic process	biological_process	BraA08g022010.3C;BraA06g024490.3C;BraA09g020720.3C;BraA02g036200.3C;BraA06g012750.3C;BraA01g008000.3C;BraA09g045840.3C;BraA02g000440.3C;BraA06g018570.3C;BraA08g029510.3C;BraA05g007890.3C;BraA09g018640.3C;BraA10g033380.3C;BraA06g039130.3C;BraA03g001680.3C;BraA10g031670.3C;BraA04g029150.3C;BraA02g001450.3C	0.151937
GO:0003872	6-phosphofructokinase activity	molecular_function	BraA05g017860.3C;BraA07g040190.3C;BraA08g021950.3C;BraA01g008380.3C;BraA08g010410.3C;BraA01g017010.3C;BraA02g012740.3C;BraA06g009590.3C;BraA01g038700.3C;BraA10g014550.3C;BraA02g037780.3C;BraA06g040830.3C;BraA06g016400.3C;BraA03g044610.3C;BraA08g031270.3C;BraA09g025990.3C;BraA03g012880.3C;BraA01g005200.3C	0.151937
GO:0005783	endoplasmic reticulum	cellular_component	BraA05g009130.3C;BraA03g007630.3C;BraA10g004330.3C;BraA03g022550.3C;BraA09g026840.3C;BraA05g014270.3C;BraA06g002370.3C;BraA09g015400.3C;BraA06g015830.3C;BraA01g005870.3C;BraA05g013280.3C;BraA09g013580.3C;BraA01g017820.3C;BraA05g001610.3C;BraA01g020950.3C;BraA09g055870.3C;BraA05g018100.3C;BraA09g054760.3C;BraA05g041530.3C;BraA06g015820.3C;BraA09g043200.3C;BraA04g007570.3C;BraA02g020600.3C;BraA08g0…	0.153815
GO:0030586	[methionine synthase] reductase activity	molecular_function	BraA01g035480.3C;BraA02g004520.3C;BraA03g055590.3C;BraA01g007480.3C;BraA01g021970.3C;BraA08g018180.3C	0.157201
GO:0004659	prenyltransferase activity	molecular_function	BraA05g035000.3C;BraA01g028360.3C;BraA03g035080.3C;BraA04g031070.3C;BraA05g004400.3C;BraA07g001790.3C	0.157201
GO:0000257	nitrilase activity	molecular_function	BraA02g006840.3C;BraA06g021550.3C;BraA02g009700.3C;BraA04g022180.3C;BraA03g012980.3C;BraA09g029370.3C	0.157201
GO:0004046	aminoacylase activity	molecular_function	BraA03g018430.3C;BraA01g000040.3C;BraA06g044960.3C;BraA03g018420.3C;BraA10g007380.3C;BraA03g018410.3C	0.157201
GO:0004579	dolichyl-diphosphooligosaccharide-protein glycotransferase activity	molecular_function	BraA01g011920.3C;BraA03g049450.3C;BraA09g032900.3C;BraA05g023510.3C;BraA07g017270.3C;BraA09g009460.3C	0.157201
GO:0004366	glycerol-3-phosphate O-acyltransferase activity	molecular_function	BraA01g039620.3C;BraA03g029380.3C;BraA05g034970.3C;BraA10g028830.3C;BraA10g001190.3C;BraA09g002200.3C;BraA09g000610.3C;BraA05g023520.3C;BraA09g032920.3C;BraA01g003150.3C;BraA01g039650.3C;BraA10g018390.3C;BraA08g008890.3C;BraA10g005240.3C	0.161476
GO:0006813	potassium ion transport	biological_process	BraA10g026410.3C;BraA09g025530.3C;BraA09g066290.3C;BraA03g063770.3C;BraA10g000230.3C;BraA09g065510.3C;BraA07g001170.3C;BraA09g056520.3C;BraA07g001230.3C;BraA09g025340.3C;BraA10g000240.3C;BraA07g001270.3C;BraA07g001220.3C;BraA07g001180.3C	0.161476
GO:0004970	ionotropic glutamate receptor activity	molecular_function	BraA04g018240.3C;BraA04g020860.3C;BraA04g018250.3C;BraA02g039610.3C;BraA04g020850.3C;BraA02g039620.3C;BraA04g023230.3C;BraA02g039600.3C;BraA04g020840.3C;BraA05g012530.3C;BraA09g042780.3C;BraA04g020820.3C;BraA09g004180.3C;BraA01g003100.3C;BraA07g039260.3C;BraA03g017180.3C;BraA05g012500.3C;BraA09g004170.3C;BraA08g015350.3C;BraA05g014940.3C;BraA09g051050.3C;BraA06g035600.3C;BraA04g020830.3C;BraA10g0…	0.163686
GO:0003700	transcription factor activity, sequence-specific DNA binding	molecular_function	BraA02g005890.3C;BraA09g009170.3C;BraA10g021470.3C;BraA09g047100.3C;BraA09g055240.3C;BraA03g053220.3C;BraA04g001630.3C;BraA04g014060.3C;BraA09g036670.3C;BraA02g038810.3C;BraA09g025880.3C;BraA09g021790.3C;BraA01g019380.3C;BraA05g008730.3C;BraA03g054520.3C;BraA07g009910.3C;BraA04g025520.3C;BraA08g018080.3C;BraA06g012090.3C;BraA08g001220.3C;BraA01g008990.3C;BraA02g042630.3C;BraA08g000570.3C;BraA03g0…	0.166068
GO:0009409	response to cold	biological_process	BraA06g019540.3C;BraA03g040550.3C;BraA05g024380.3C;BraA03g027010.3C;BraA01g031350.3C;BraA06g038770.3C;BraA09g025930.3C;BraA07g014510.3C;BraA09g029800.3C;BraA09g024510.3C	0.167286
GO:0003852	2-isopropylmalate synthase activity	molecular_function	BraA03g043740.3C;BraA04g024980.3C;BraA02g042670.3C;BraA04g024970.3C;BraA03g043750.3C;BraA06g014130.3C;BraA02g027350.3C;BraA09g057230.3C;BraA03g043730.3C;BraA02g042660.3C	0.167286
GO:0000139	Golgi membrane	cellular_component	BraA07g019300.3C;BraA09g022210.3C;BraA04g002390.3C;BraA07g013560.3C;BraA07g022200.3C;BraA05g039110.3C;BraA10g025580.3C;BraA02g026880.3C;BraA08g009570.3C;BraA07g013540.3C;BraA03g017790.3C;BraA10g032230.3C;BraA09g058480.3C;BraA08g024810.3C;BraA01g043110.3C;BraA06g008310.3C;BraA10g011680.3C;BraA02g007680.3C;BraA08g006700.3C;BraA05g036970.3C;BraA09g055000.3C;BraA10g002970.3C;BraA07g016700.3C;BraA06g0…	0.172399
GO:0004857	enzyme inhibitor activity	molecular_function	BraA01g015990.3C;BraA05g034760.3C;BraA06g000140.3C;BraA05g034720.3C;BraA09g008340.3C;BraA08g026540.3C;BraA01g039130.3C;BraA09g000800.3C;BraA06g006240.3C;BraA01g015980.3C;BraA06g006280.3C;BraA03g052340.3C;BraA02g002170.3C;BraA02g019020.3C;BraA09g039750.3C;BraA02g019860.3C;BraA01g035450.3C;BraA02g027910.3C;BraA03g025650.3C;BraA06g017740.3C;BraA03g013820.3C;BraA09g026360.3C;BraA01g038560.3C;BraA06g0…	0.178566
GO:0005381	iron ion transmembrane transporter activity	molecular_function	BraA01g028630.3C;BraA01g010980.3C;BraA03g048890.3C;BraA01g011010.3C;BraA01g010990.3C;BraA09g010260.3C;BraA07g025990.3C;BraA06g031620.3C;BraA09g061640.3C;BraA01g011020.3C;BraA07g042710.3C;BraA06g040200.3C;BraA06g016610.3C;BraA01g018700.3C;BraA08g027450.3C;BraA07g005470.3C;BraA09g021020.3C;BraA07g015310.3C;BraA01g011000.3C;BraA02g031570.3C;BraA09g016600.3C;BraA03g048930.3C;BraA02g035060.3C;BraA03g0…	0.179133
GO:0004712	protein serine/threonine/tyrosine kinase activity	molecular_function	BraA07g017240.3C;BraA01g041910.3C;BraA07g024070.3C;BraA03g032770.3C;BraA09g013760.3C;BraA09g053750.3C;BraA03g026100.3C;BraA05g015530.3C;BraA04g013180.3C;BraA04g017890.3C;BraA08g013210.3C;BraA09g049670.3C;BraA06g019990.3C;BraA09g014540.3C;BraA09g012520.3C;BraA09g066130.3C;BraA05g040580.3C;BraA09g053760.3C;BraA03g011830.3C;BraA09g009420.3C;BraA09g015900.3C;BraA01g041920.3C;BraA04g002570.3C;BraA03g0…	0.188538
GO:0005774	vacuolar membrane	cellular_component	BraA04g015300.3C;BraA07g027910.3C;BraA07g042450.3C;BraA10g003980.3C;BraA09g045690.3C;BraA06g024820.3C;BraA10g033370.3C;BraA02g034990.3C;BraA03g021820.3C;BraA09g058290.3C;BraA06g005630.3C;BraA03g007000.3C;BraA09g003060.3C;BraA09g023280.3C;BraA06g040290.3C;BraA05g034270.3C;BraA05g002070.3C;BraA01g023990.3C;BraA06g000710.3C;BraA09g045660.3C;BraA01g014330.3C;BraA04g027540.3C;BraA03g038440.3C;BraA09g0…	0.189035
GO:0001558	regulation of cell growth	biological_process	BraA05g040600.3C;BraA08g018930.3C;BraA01g044820.3C;BraA03g054590.3C;BraA03g037610.3C;BraA03g045720.3C;BraA01g035870.3C;BraA05g030540.3C;BraA04g029130.3C;BraA09g052700.3C;BraA03g057080.3C;BraA01g008940.3C;BraA01g022250.3C	0.1971
GO:0004022	alcohol dehydrogenase (NAD) activity	molecular_function	BraA02g041970.3C;BraA08g026820.3C;BraA09g032360.3C;BraA08g002160.3C;BraA10g020890.3C;BraA01g012750.3C;BraA06g006380.3C;BraA09g033130.3C;BraA06g042570.3C;BraA05g022940.3C;BraA08g002870.3C;BraA07g014660.3C;BraA09g040580.3C	0.1971
GO:0004805	trehalose-phosphatase activity	molecular_function	BraA01g013200.3C;BraA03g050290.3C;BraA01g000660.3C;BraA06g044220.3C;BraA02g015830.3C;BraA03g004140.3C;BraA02g045000.3C;BraA08g022190.3C;BraA07g041220.3C;BraA04g016190.3C;BraA06g028610.3C;BraA05g021550.3C;BraA10g027740.3C	0.1971
GO:0001708	cell fate specification	biological_process	BraA06g037290.3C;BraA07g012310.3C;BraA08g006320.3C;BraA07g016350.3C;BraA01g030110.3C;BraA04g013890.3C;BraA06g010890.3C;BraA09g003340.3C;BraA07g029670.3C;BraA03g005490.3C;BraA02g004590.3C;BraA08g025030.3C;BraA09g037210.3C	0.1971
GO:0000288	nuclear-transcribed mRNA catabolic process, deadenylation-dependent decay	biological_process	BraA09g066430.3C;BraA06g005060.3C;BraA09g000840.3C;BraA02g038970.3C;BraA10g000100.3C;BraA05g033640.3C;BraA08g033400.3C;BraA03g011190.3C;BraA05g033630.3C;BraA07g020890.3C;BraA02g010790.3C;BraA07g005840.3C;BraA05g032860.3C	0.1971
GO:0003746	translation elongation factor activity	molecular_function	BraA06g005200.3C;BraA06g039520.3C;BraA07g035750.3C;BraA03g005160.3C;BraA03g028810.3C;BraA02g026520.3C;BraA05g013200.3C;BraA02g004340.3C;BraA08g014100.3C;BraA09g063030.3C;BraA08g023440.3C;BraA02g002800.3C;BraA03g010740.3C;BraA08g032500.3C;BraA01g011410.3C;BraA03g049270.3C;BraA09g063940.3C;BraA07g019980.3C;BraA05g037550.3C;BraA09g027470.3C;BraA09g063010.3C;BraA02g041210.3C;BraA02g044260.3C;BraA04g0…	0.202147
GO:0016740	transferase activity	molecular_function	BraA02g038860.3C;BraA07g019770.3C;BraA03g037380.3C;BraA04g019120.3C;BraA04g015030.3C;BraA02g038850.3C;BraA02g039050.3C;BraA06g036320.3C;BraA06g036310.3C	0.21118
GO:0004602	glutathione peroxidase activity	molecular_function	BraA03g016820.3C;BraA10g006200.3C;BraA05g013090.3C;BraA09g026940.3C;BraA04g032410.3C;BraA05g000010.3C;BraA09g053340.3C;BraA03g057030.3C;BraA03g022710.3C	0.21118
GO:0004845	uracil phosphoribosyltransferase activity	molecular_function	BraA01g017260.3C;BraA04g013500.3C;BraA09g044860.3C;BraA02g037490.3C;BraA08g000320.3C;BraA09g003220.3C;BraA07g021470.3C;BraA06g037800.3C;BraA10g013890.3C	0.21118
GO:0006633	fatty acid biosynthetic process	biological_process	BraA08g017820.3C;BraA03g034680.3C;BraA01g044100.3C;BraA01g006810.3C;BraA03g031070.3C;BraA01g044130.3C;BraA05g041270.3C;BraA05g035680.3C;BraA01g022680.3C	0.21118
GO:0004222	metalloendopeptidase activity	molecular_function	BraA07g032930.3C;BraA07g031200.3C;BraA06g037850.3C;BraA06g044150.3C;BraA01g044350.3C;BraA07g030070.3C;BraA04g019050.3C;BraA01g033860.3C;BraA08g002390.3C;BraA09g063650.3C;BraA09g019210.3C;BraA01g019940.3C;BraA05g002460.3C;BraA07g031190.3C;BraA02g003500.3C;BraA04g023290.3C;BraA05g030680.3C;BraA01g043680.3C;BraA05g040980.3C;BraA05g017930.3C;BraA02g040260.3C;BraA06g026010.3C;BraA10g010340.3C;BraA01g0…	0.211632
GO:0003860	3-hydroxyisobutyryl-CoA hydrolase activity	molecular_function	BraA02g045840.3C;BraA04g020930.3C;BraA05g014780.3C;BraA04g021030.3C;BraA05g014750.3C	0.213988
GO:0005244	voltage-gated ion channel activity	molecular_function	BraA08g034720.3C;BraA10g003230.3C;BraA04g014710.3C;BraA08g023130.3C;BraA01g021470.3C	0.213988
GO:0006950	response to stress	biological_process	BraA10g022600.3C;BraA10g007620.3C;BraA04g006460.3C;BraA07g034080.3C;BraA08g005810.3C	0.213988
GO:0004837	tyrosine decarboxylase activity	molecular_function	BraA09g012250.3C;BraA07g000490.3C;BraA07g000480.3C;BraA09g012270.3C;BraA09g056260.3C	0.213988
GO:0000938	GARP complex	cellular_component	BraA01g010820.3C;BraA09g002160.3C;BraA01g007090.3C;BraA05g018980.3C;BraA03g048840.3C	0.213988
GO:0004838	L-tyrosine:2-oxoglutarate aminotransferase activity	molecular_function	BraA03g025500.3C;BraA09g053440.3C;BraA09g056110.3C;BraA05g015170.3C;BraA02g014250.3C	0.213988
GO:0005338	nucleotide-sugar transmembrane transporter activity	molecular_function	BraA09g019240.3C;BraA01g029920.3C;BraA03g027070.3C;BraA09g031310.3C;BraA05g022310.3C	0.213988
GO:0004839	ubiquitin activating enzyme activity	molecular_function	BraA04g021420.3C;BraA05g014140.3C;BraA05g038170.3C;BraA03g016030.3C;BraA10g029160.3C	0.213988
GO:0006486	protein glycosylation	biological_process	BraA02g011440.3C;BraA06g030380.3C;BraA10g016660.3C;BraA10g018260.3C;BraA10g018250.3C	0.213988
GO:0005384	manganese ion transmembrane transporter activity	molecular_function	BraA05g033000.3C;BraA09g048620.3C;BraA09g014630.3C;BraA07g023220.3C;BraA04g002910.3C	0.213988
GO:0002229	defense response to oomycetes	biological_process	BraA01g000830.3C;BraA06g031740.3C;BraA03g027270.3C;BraA09g017290.3C;BraA10g026870.3C;BraA03g059300.3C;BraA04g016310.3C;BraA09g006180.3C;BraA08g022020.3C;BraA10g018080.3C;BraA10g018110.3C;BraA03g027290.3C;BraA10g018010.3C;BraA02g042070.3C;BraA09g028040.3C;BraA02g040990.3C;BraA10g018100.3C;BraA03g061220.3C;BraA01g015240.3C;BraA06g020940.3C;BraA09g014290.3C;BraA06g031900.3C;BraA07g028550.3C;BraA07g0…	0.216217
GO:0000049	tRNA binding	molecular_function	BraA07g039650.3C;BraA09g049320.3C;BraA10g013540.3C;BraA10g023760.3C;BraA04g015880.3C;BraA08g006300.3C;BraA03g021600.3C;BraA09g006050.3C;BraA08g003120.3C;BraA01g001960.3C;BraA04g008310.3C;BraA05g028050.3C;BraA09g048670.3C;BraA05g019410.3C;BraA05g019430.3C;BraA07g023280.3C;BraA06g003410.3C;BraA01g044450.3C;BraA03g007100.3C;BraA02g009970.3C;BraA05g022570.3C;BraA04g028820.3C;BraA03g009260.3C;BraA09g0…	0.216217
GO:0004806	triglyceride lipase activity	molecular_function	BraA05g002920.3C;BraA08g005570.3C;BraA09g027630.3C;BraA06g018820.3C;BraA04g001070.3C;BraA10g032260.3C;BraA05g004680.3C;BraA03g030070.3C;BraA03g016580.3C;BraA03g001420.3C;BraA03g001410.3C;BraA10g004570.3C;BraA10g007150.3C;BraA10g004960.3C;BraA01g037530.3C;BraA10g005490.3C;BraA07g022740.3C;BraA08g033990.3C;BraA01g010040.3C;BraA02g001210.3C;BraA03g046650.3C;BraA05g032720.3C;BraA05g038250.3C;BraA05g0…	0.218128
GO:0004526	ribonuclease P activity	molecular_function	BraA05g024750.3C;BraA10g011350.3C;BraA03g048350.3C;BraA09g058470.3C;BraA03g029530.3C;BraA02g025560.3C;BraA09g038120.3C;BraA02g025570.3C;BraA06g031000.3C;BraA09g059950.3C;BraA09g059940.3C;BraA07g025970.3C	0.239127
GO:0000326	protein storage vacuole	cellular_component	BraA07g028850.3C;BraA06g043320.3C;BraA04g026140.3C;BraA08g027170.3C;BraA05g030960.3C;BraA07g037330.3C;BraA02g021560.3C;BraA04g001660.3C;BraA03g037440.3C;BraA07g015060.3C;BraA09g062480.3C;BraA09g065170.3C;BraA07g000570.3C;BraA06g006050.3C;BraA08g003870.3C;BraA08g018960.3C;BraA06g017290.3C;BraA10g002460.3C;BraA07g024350.3C;BraA02g031070.3C;BraA01g036030.3C;BraA01g008970.3C	0.239567
GO:0000038	very long-chain fatty acid metabolic process	biological_process	BraA04g015930.3C;BraA02g018480.3C;BraA09g065990.3C;BraA05g010280.3C;BraA02g033670.3C;BraA09g010440.3C;BraA07g030740.3C;BraA09g022550.3C;BraA07g004540.3C;BraA07g029700.3C;BraA04g019210.3C;BraA08g015890.3C;BraA02g039980.3C;BraA01g004000.3C;BraA06g041310.3C;BraA03g043030.3C;BraA03g058730.3C;BraA05g001130.3C;BraA09g052820.3C;BraA06g015010.3C;BraA08g015900.3C;BraA07g005530.3C	0.239567
GO:0004089	carbonate dehydratase activity	molecular_function	BraA09g039520.3C;BraA07g035140.3C;BraA09g015500.3C;BraA01g027230.3C;BraA06g005290.3C;BraA06g004890.3C;BraA07g014010.3C;BraA08g014670.3C;BraA06g005330.3C;BraA01g044810.3C;BraA01g011720.3C;BraA08g014570.3C;BraA08g028180.3C;BraA07g018600.3C;BraA05g020740.3C;BraA06g004880.3C;BraA06g005320.3C;BraA08g016540.3C;BraA05g040570.3C;BraA06g027810.3C;BraA09g043790.3C;BraA10g032140.3C;BraA03g016460.3C;BraA08g0…	0.246831
GO:0005643	nuclear pore	cellular_component	BraA07g042260.3C;BraA07g026300.3C;BraA02g000720.3C;BraA02g040100.3C;BraA05g022750.3C;BraA10g032840.3C;BraA07g020150.3C;BraA05g039610.3C	0.264954
GO:0004550	nucleoside diphosphate kinase activity	molecular_function	BraA06g026850.3C;BraA02g028590.3C;BraA08g000450.3C;BraA09g020880.3C;BraA03g042760.3C;BraA09g007780.3C;BraA08g029270.3C;BraA09g027590.3C	0.264954
GO:0005094	Rho GDP-dissociation inhibitor activity	molecular_function	BraA08g031220.3C;BraA06g009520.3C;BraA03g063420.3C;BraA09g015840.3C;BraA05g037850.3C;BraA09g012530.3C;BraA09g061000.3C;BraA01g041260.3C	0.264954
GO:0003724	RNA helicase activity	molecular_function	BraA09g017560.3C;BraA01g027760.3C;BraA08g025720.3C;BraA09g042480.3C;BraA09g038310.3C;BraA03g024390.3C;BraA07g027660.3C;BraA10g004290.3C	0.264954
GO:0005545	1-phosphatidylinositol binding	molecular_function	BraA01g016660.3C;BraA07g012630.3C;BraA09g037590.3C;BraA10g015120.3C;BraA09g023240.3C;BraA08g035510.3C;BraA04g018730.3C;BraA02g012440.3C;BraA09g031600.3C;BraA09g053130.3C;BraA01g005770.3C;BraA06g040390.3C;BraA08g009360.3C;BraA06g011020.3C;BraA02g018070.3C;BraA02g027220.3C;BraA02g034900.3C;BraA09g065410.3C	0.267237
GO:0004407	histone deacetylase activity	molecular_function	BraA03g010380.3C;BraA04g019970.3C;BraA10g009670.3C;BraA07g013140.3C;BraA09g007670.3C;BraA03g038370.3C;BraA06g024220.3C;BraA03g038380.3C;BraA06g021310.3C;BraA05g028840.3C;BraA01g004600.3C;BraA02g009900.3C;BraA03g065000.3C;BraA10g018810.3C;BraA06g018680.3C;BraA02g009940.3C;BraA01g034370.3C;BraA06g018670.3C	0.267237
GO:0003924	GTPase activity	molecular_function	BraA01g012530.3C;BraA06g035870.3C;BraA10g017050.3C;BraA01g027170.3C;BraA05g012980.3C;BraA01g036920.3C;BraA03g044850.3C;BraA05g024240.3C;BraA08g024180.3C;BraA09g045670.3C;BraA08g012220.3C;BraA10g017660.3C;BraA08g026760.3C;BraA04g031740.3C;BraA09g042520.3C;BraA01g042740.3C;BraA08g028870.3C;BraA07g039280.3C;BraA05g014630.3C;BraA01g007230.3C;BraA09g024440.3C;BraA05g005460.3C;BraA01g003360.3C;BraA05g0…	0.267731
GO:0006952	defense response	biological_process	BraA07g037160.3C;BraA09g015210.3C;BraA03g009600.3C;BraA07g029580.3C;BraA09g020650.3C;BraA07g037170.3C;BraA07g028990.3C;BraA06g014590.3C;BraA07g042230.3C;BraA05g012760.3C;BraA08g016150.3C;BraA02g036150.3C;BraA09g020020.3C;BraA05g025040.3C;BraA04g023510.3C;BraA08g016160.3C;BraA02g021320.3C;BraA07g029610.3C;BraA07g003200.3C;BraA05g019250.3C;BraA09g019140.3C;BraA07g042480.3C;BraA01g004160.3C;BraA02g0…	0.268837
GO:0004556	alpha-amylase activity	molecular_function	BraA05g040120.3C;BraA05g021220.3C;BraA03g026790.3C;BraA10g031940.3C;BraA01g022020.3C;BraA07g039610.3C;BraA08g004660.3C;BraA05g006150.3C;BraA08g035410.3C;BraA05g021230.3C;BraA07g034700.3C	0.288162
GO:0004338	glucan exo-1,3-beta-glucosidase activity	molecular_function	BraA04g003400.3C;BraA10g020220.3C;BraA04g003410.3C;BraA09g047900.3C;BraA09g047910.3C;BraA09g047880.3C;BraA02g008840.3C;BraA04g003380.3C;BraA10g020080.3C;BraA04g003370.3C;BraA04g003430.3C	0.288162
GO:0004675	transmembrane receptor protein serine/threonine kinase activity	molecular_function	BraA07g036270.3C;BraA09g037820.3C;BraA03g058170.3C;BraA04g017630.3C;BraA09g037800.3C;BraA10g023910.3C;BraA03g058280.3C;BraA01g004630.3C;BraA03g057870.3C;BraA07g031960.3C;BraA07g029410.3C	0.288162
GO:0000828	inositol hexakisphosphate kinase activity	molecular_function	BraA07g005500.3C;BraA09g021320.3C;BraA03g030530.3C;BraA03g030520.3C;BraA01g044920.3C;BraA04g008980.3C;BraA02g045590.3C;BraA10g024300.3C;BraA07g003860.3C;BraA03g006600.3C;BraA05g016040.3C	0.288162
GO:0000215	tRNA 2'-phosphotransferase activity	molecular_function	BraA05g005060.3C;BraA05g005090.3C;BraA05g005000.3C;BraA05g005030.3C	0.291286
GO:0004802	transketolase activity	molecular_function	BraA09g050480.3C;BraA05g005050.3C;BraA07g024370.3C;BraA04g001550.3C	0.291286
GO:0000922	spindle pole	cellular_component	BraA06g026080.3C;BraA06g019280.3C;BraA06g026050.3C;BraA02g043740.3C	0.291286
GO:0000769	syncytium formation by mitosis without cytokinesis	biological_process	BraA06g017630.3C;BraA09g003810.3C;BraA02g038760.3C;BraA06g036350.3C	0.291286
GO:0030170	pyridoxal phosphate binding	molecular_function	BraA05g025100.3C;BraA01g031790.3C;BraA05g025080.3C;BraA05g025070.3C	0.291286
GO:0000312	plastid small ribosomal subunit	cellular_component	BraA07g038680.3C;BraA09g023110.3C;BraA09g023100.3C;BraA07g027980.3C	0.291286
GO:0000126	transcription factor TFIIIB complex	cellular_component	BraA08g022600.3C;BraA03g033870.3C;BraA05g000380.3C;BraA03g033880.3C	0.291286
GO:0004776	succinate-CoA ligase (GDP-forming) activity	molecular_function	BraA03g003440.3C;BraA03g043560.3C;BraA02g002660.3C;BraA10g030620.3C	0.291286
GO:0001736	establishment of planar polarity	biological_process	BraA04g027030.3C;BraA05g007500.3C;BraA03g019900.3C;BraA10g032720.3C	0.291286
GO:0000339	RNA cap binding	molecular_function	BraA03g048010.3C;BraA03g042370.3C;BraA01g009620.3C;BraA08g012700.3C	0.291286
GO:0004103	choline kinase activity	molecular_function	BraA07g036140.3C;BraA09g031250.3C;BraA07g038230.3C;BraA09g029920.3C	0.291286
GO:0004753	saccharopine dehydrogenase activity	molecular_function	BraA03g057740.3C;BraA09g034330.3C;BraA03g057730.3C;BraA01g004800.3C	0.291286
GO:0004609	phosphatidylserine decarboxylase activity	molecular_function	BraA01g016690.3C;BraA10g015110.3C;BraA01g019850.3C;BraA01g011910.3C	0.291286
GO:0006397	mRNA processing	biological_process	BraA09g048030.3C;BraA09g021170.3C;BraA02g031770.3C;BraA01g044440.3C	0.291286
GO:0004140	dephospho-CoA kinase activity	molecular_function	BraA05g022530.3C;BraA07g002470.3C;BraA07g018230.3C;BraA03g025100.3C	0.291286
GO:0001560	regulation of cell growth by extracellular stimulus	biological_process	BraA07g000220.3C;BraA09g012050.3C;BraA02g011720.3C;BraA07g001360.3C	0.291286
GO:0034219	carbohydrate transmembrane transport	biological_process	BraA03g057210.3C;BraA08g017160.3C;BraA01g005790.3C;BraA07g005640.3C	0.291286
GO:0000077	DNA damage checkpoint	biological_process	BraA01g024570.3C;BraA08g000050.3C;BraA05g005220.3C;BraA07g012870.3C	0.291286
GO:0009536	plastid	cellular_component	BraA06g023060.3C;BraA06g023070.3C;BraA09g030470.3C;BraA06g023040.3C	0.291286
GO:0004560	alpha-L-fucosidase activity	molecular_function	BraA04g020110.3C;BraA02g017900.3C;BraA07g033140.3C;BraA02g037970.3C	0.291286
GO:0005047	signal recognition particle binding	molecular_function	BraA10g028460.3C;BraA07g001970.3C;BraA06g024880.3C;BraA06g017960.3C	0.291286
GO:0001056	RNA polymerase III activity	molecular_function	BraA06g042680.3C;BraA09g063720.3C;BraA02g010480.3C;BraA08g033830.3C	0.291286
GO:0004637	phosphoribosylamine-glycine ligase activity	molecular_function	BraA08g032380.3C;BraA07g004450.3C;BraA03g022220.3C;BraA06g006740.3C	0.291286
GO:0004146	dihydrofolate reductase activity	molecular_function	BraA03g043050.3C;BraA03g025840.3C;BraA03g058890.3C;BraA01g003720.3C	0.291286
GO:0000179	rRNA (adenine-N6,N6-)-dimethyltransferase activity	molecular_function	BraA08g010530.3C;BraA07g010480.3C;BraA09g066300.3C;BraA07g010500.3C	0.291286
GO:0000122	negative regulation of transcription from RNA polymerase II promoter	biological_process	BraA08g032220.3C;BraA04g000360.3C;BraA01g025270.3C;BraA06g003900.3C;BraA05g027480.3C;BraA09g052330.3C;BraA02g033960.3C;BraA09g061990.3C;BraA02g011020.3C;BraA06g007020.3C;BraA01g019220.3C;BraA03g011140.3C;BraA08g009350.3C;BraA10g017630.3C;BraA10g025660.3C;BraA03g047500.3C;BraA09g022710.3C	0.308889
GO:0004869	cysteine-type endopeptidase inhibitor activity	molecular_function	BraA01g020080.3C;BraA10g026160.3C;BraA03g001950.3C;BraA08g011910.3C;BraA01g020130.3C;BraA01g038880.3C;BraA09g024350.3C;BraA03g017020.3C;BraA06g041030.3C;BraA02g034110.3C;BraA10g002240.3C;BraA05g034530.3C;BraA01g042110.3C;BraA03g040490.3C;BraA08g011920.3C;BraA04g028950.3C;BraA09g015320.3C;BraA01g020100.3C;BraA01g020070.3C;BraA04g023050.3C;BraA01g020120.3C;BraA09g015330.3C;BraA05g039100.3C	0.317034
GO:0000272	polysaccharide catabolic process	biological_process	BraA03g018400.3C;BraA05g005510.3C;BraA03g022860.3C;BraA06g007340.3C;BraA10g021480.3C;BraA04g030190.3C;BraA03g022880.3C;BraA06g031470.3C;BraA02g013180.3C;BraA05g003700.3C;BraA06g006230.3C;BraA02g031750.3C;BraA09g006270.3C;BraA03g022890.3C;BraA04g030200.3C;BraA03g022850.3C;BraA05g012610.3C;BraA03g022840.3C;BraA09g000540.3C;BraA09g018740.3C;BraA03g016200.3C;BraA05g003710.3C;BraA10g009650.3C;BraA06g0…	0.319026
GO:0004553	hydrolase activity, hydrolyzing O-glycosyl compounds	molecular_function	BraA03g011780.3C;BraA03g035110.3C;BraA09g039940.3C;BraA07g007140.3C;BraA09g060330.3C;BraA10g013180.3C;BraA09g052050.3C;BraA04g020960.3C;BraA10g019680.3C;BraA01g029610.3C;BraA02g013450.3C;BraA06g023300.3C;BraA09g028870.3C;BraA05g004360.3C;BraA06g038720.3C;BraA07g000160.3C;BraA04g005430.3C;BraA02g020430.3C;BraA07g008730.3C;BraA10g031520.3C;BraA02g040250.3C;BraA05g004420.3C;BraA10g012660.3C;BraA07g0…	0.328727
GO:0002084	protein depalmitoylation	biological_process	BraA03g050140.3C;BraA01g019180.3C;BraA01g019170.3C;BraA01g019190.3C;BraA08g012400.3C;BraA03g050150.3C;BraA01g019160.3C	0.330018
GO:0009738	abscisic acid-activated signaling pathway	biological_process	BraA07g032090.3C;BraA07g035500.3C;BraA07g035510.3C;BraA04g010620.3C;BraA04g010610.3C;BraA07g029770.3C;BraA01g003560.3C	0.330018
GO:0003999	adenine phosphoribosyltransferase activity	molecular_function	BraA07g018050.3C;BraA09g037040.3C;BraA08g024900.3C;BraA07g025620.3C;BraA10g026970.3C;BraA03g050250.3C;BraA07g043200.3C	0.330018
GO:0000050	urea cycle	biological_process	BraA02g031240.3C;BraA07g034470.3C;BraA07g027800.3C;BraA01g033100.3C;BraA09g035170.3C;BraA02g019260.3C;BraA03g026730.3C	0.330018
GO:0004367	glycerol-3-phosphate dehydrogenase [NAD+] activity	molecular_function	BraA01g037760.3C;BraA09g032310.3C;BraA05g002290.3C;BraA05g038020.3C;BraA07g020220.3C;BraA04g028810.3C;BraA03g021990.3C	0.330018
GO:0046872	metal ion binding	molecular_function	BraA09g006430.3C;BraA08g027290.3C;BraA09g040090.3C;BraA06g031160.3C;BraA03g014840.3C;BraA03g028370.3C;BraA02g015200.3C	0.330018
GO:0004373	glycogen (starch) synthase activity	molecular_function	BraA01g044640.3C;BraA01g044620.3C;BraA06g008300.3C;BraA05g022890.3C;BraA08g031440.3C;BraA05g040820.3C;BraA08g012850.3C	0.330018
GO:0005765	lysosomal membrane	cellular_component	BraA09g023740.3C;BraA04g030580.3C;BraA07g005680.3C;BraA03g057850.3C;BraA01g004650.3C;BraA04g012740.3C;BraA02g035930.3C	0.330018
GO:0001055	RNA polymerase II activity	molecular_function	BraA08g014260.3C;BraA01g002750.3C;BraA04g007220.3C;BraA01g012410.3C;BraA08g014710.3C;BraA08g020570.3C;BraA09g043270.3C	0.330018
GO:0004040	amidase activity	molecular_function	BraA06g027920.3C;BraA06g027890.3C;BraA01g003450.3C;BraA09g062520.3C;BraA10g031190.3C;BraA10g029860.3C;BraA02g033980.3C	0.330018
GO:0000325	plant-type vacuole	cellular_component	BraA01g038370.3C;BraA02g024930.3C;BraA04g002590.3C;BraA05g011510.3C;BraA09g052000.3C;BraA07g023570.3C;BraA03g027540.3C;BraA02g028510.3C;BraA09g060900.3C;BraA04g029340.3C;BraA08g001300.3C;BraA03g031840.3C;BraA05g020280.3C;BraA02g029730.3C;BraA02g000390.3C;BraA03g031820.3C;BraA01g004530.3C;BraA03g003860.3C;BraA06g039940.3C;BraA09g034670.3C;BraA06g004620.3C;BraA03g060790.3C;BraA09g015710.3C;BraA03g0…	0.342411
GO:0000160	phosphorelay signal transduction system	biological_process	BraA03g002890.3C;BraA09g003800.3C;BraA09g051960.3C;BraA02g008380.3C;BraA05g030830.3C;BraA01g032170.3C;BraA10g001990.3C;BraA03g037500.3C;BraA02g011810.3C;BraA04g011610.3C	0.34464
GO:0004021	L-alanine:2-oxoglutarate aminotransferase activity	molecular_function	BraA07g035330.3C;BraA07g024050.3C;BraA03g051200.3C;BraA03g051230.3C;BraA09g026980.3C;BraA07g035320.3C;BraA02g019880.3C;BraA01g014290.3C;BraA09g026970.3C;BraA03g051190.3C	0.34464
GO:0005789	endoplasmic reticulum membrane	cellular_component	BraA02g028710.3C;BraA05g036520.3C;BraA01g022620.3C;BraA09g064150.3C;BraA09g064140.3C;BraA03g025310.3C;BraA09g028090.3C;BraA08g032970.3C;BraA04g032210.3C;BraA10g028030.3C;BraA09g014710.3C;BraA06g005880.3C;BraA02g028180.3C;BraA09g032060.3C;BraA09g064130.3C;BraA06g028950.3C;BraA04g031700.3C;BraA01g011420.3C;BraA10g029670.3C;BraA04g012980.3C;BraA09g062620.3C;BraA07g004190.3C;BraA05g006820.3C;BraA04g0…	0.351247
GO:0001522	pseudouridine synthesis	biological_process	BraA09g062200.3C;BraA06g015940.3C;BraA06g006680.3C;BraA07g015760.3C;BraA01g043390.3C;BraA02g007540.3C;BraA07g000330.3C;BraA09g012350.3C;BraA10g002110.3C;BraA03g033030.3C;BraA09g031170.3C;BraA06g015880.3C;BraA07g039590.3C	0.351472
GO:0000228	nuclear chromosome	cellular_component	BraA03g052600.3C;BraA01g023470.3C;BraA05g019670.3C;BraA03g038390.3C;BraA03g007370.3C;BraA04g013430.3C;BraA01g029750.3C;BraA08g006660.3C;BraA02g006410.3C;BraA10g023350.3C;BraA09g000530.3C;BraA01g009970.3C;BraA06g030840.3C	0.351472
GO:0004034	aldose 1-epimerase activity	molecular_function	BraA03g012470.3C;BraA01g014450.3C;BraA03g030570.3C;BraA01g034770.3C;BraA02g012360.3C;BraA05g025250.3C;BraA06g019200.3C;BraA05g029580.3C;BraA03g006680.3C;BraA03g006350.3C;BraA01g016640.3C;BraA09g016050.3C;BraA10g024210.3C;BraA01g001840.3C;BraA10g015230.3C;BraA03g051410.3C	0.354786
GO:0016787	hydrolase activity	molecular_function	BraA02g029020.3C;BraA02g000360.3C;BraA10g019340.3C;BraA01g015130.3C;BraA01g025370.3C;BraA09g052350.3C;BraA07g019500.3C;BraA06g021460.3C;BraA04g005550.3C;BraA07g020680.3C;BraA05g012290.3C;BraA01g003930.3C;BraA05g028280.3C;BraA03g038650.3C;BraA09g045220.3C;BraA10g019300.3C	0.354786
GO:0001510	RNA methylation	biological_process	BraA01g011690.3C;BraA04g016360.3C;BraA01g011700.3C;BraA01g021210.3C;BraA01g009220.3C;BraA01g011680.3C;BraA06g019170.3C;BraA10g033700.3C;BraA03g046270.3C;BraA02g025740.3C;BraA03g050340.3C;BraA09g029720.3C;BraA06g000170.3C;BraA04g023070.3C;BraA05g025730.3C;BraA06g013060.3C	0.354786
GO:0004129	cytochrome-c oxidase activity	molecular_function	BraA05g031440.3C;BraA10g013950.3C;BraA05g031410.3C;BraA03g012110.3C;BraA08g008730.3C;BraA05g031450.3C;BraA07g025110.3C;BraA03g037030.3C;BraA03g037020.3C;BraA03g037060.3C;BraA03g054120.3C;BraA02g026060.3C;BraA01g018870.3C;BraA09g051790.3C;BraA01g036550.3C;BraA05g031420.3C	0.354786
GO:0003333	amino acid transmembrane transport	biological_process	BraA09g037270.3C;BraA03g049440.3C;BraA08g005920.3C;BraA03g021190.3C;BraA03g059280.3C;BraA02g024300.3C;BraA05g033350.3C;BraA08g015450.3C;BraA10g033710.3C;BraA05g020900.3C;BraA10g007850.3C;BraA04g024910.3C;BraA07g012400.3C;BraA03g025870.3C;BraA05g011560.3C;BraA01g003230.3C;BraA09g055860.3C;BraA03g003820.3C;BraA06g040090.3C;BraA01g033640.3C;BraA08g015430.3C;BraA10g005660.3C;BraA10g028440.3C;BraA09g0…	0.355323
GO:0006869	lipid transport	biological_process	BraA01g026940.3C;BraA09g016640.3C;BraA09g015810.3C;BraA06g009500.3C;BraA01g031850.3C;BraA07g037610.3C;BraA09g026280.3C;BraA04g032420.3C;BraA05g025150.3C;BraA01g013110.3C;BraA02g027930.3C;BraA08g033450.3C;BraA03g040080.3C;BraA09g009870.3C;BraA05g015810.3C;BraA01g021450.3C;BraA09g015570.3C;BraA09g015800.3C;BraA03g063330.3C	0.35622
GO:0004190	aspartic-type endopeptidase activity	molecular_function	BraA09g018430.3C;BraA03g063990.3C;BraA09g021960.3C;BraA09g018450.3C;BraA08g009510.3C;BraA05g034380.3C;BraA10g000370.3C;BraA09g015100.3C;BraA10g021140.3C;BraA10g021130.3C;BraA01g040110.3C;BraA03g035450.3C;BraA05g034390.3C;BraA03g035820.3C;BraA10g027200.3C;BraA10g021120.3C;BraA09g066230.3C;BraA08g009530.3C;BraA01g040120.3C;BraA02g007970.3C;BraA09g025870.3C;BraA09g048150.3C	0.356544
GO:0003824	catalytic activity	molecular_function	BraA03g001110.3C;BraA03g012600.3C;BraA06g018400.3C;BraA05g012490.3C;BraA01g043290.3C;BraA02g037120.3C;BraA06g009890.3C;BraA01g036180.3C;BraA03g037880.3C;BraA09g052130.3C;BraA07g038200.3C;BraA08g006880.3C;BraA04g026520.3C;BraA03g036690.3C;BraA09g014620.3C;BraA01g033430.3C;BraA02g037200.3C;BraA09g062890.3C;BraA03g055900.3C;BraA05g011830.3C;BraA04g003260.3C;BraA10g001020.3C;BraA06g017480.3C;BraA01g0…	0.357768
GO:0005451	monovalent cation:proton antiporter activity	molecular_function	BraA04g005940.3C;BraA09g062910.3C;BraA06g021280.3C;BraA01g025860.3C;BraA10g018670.3C;BraA09g010040.3C;BraA06g023390.3C;BraA10g004440.3C;BraA03g051370.3C;BraA10g016340.3C;BraA04g014100.3C;BraA02g025240.3C;BraA04g007230.3C;BraA04g023030.3C;BraA07g021420.3C;BraA03g038020.3C;BraA09g013630.3C;BraA09g044720.3C;BraA03g010470.3C;BraA04g021540.3C;BraA01g035030.3C;BraA05g008010.3C;BraA06g005400.3C;BraA09g0…	0.386327
GO:0000724	double-strand break repair via homologous recombination	biological_process	BraA09g026210.3C;BraA08g010030.3C;BraA05g028150.3C;BraA01g004300.3C;BraA05g039970.3C;BraA05g041350.3C;BraA02g017130.3C;BraA05g036890.3C;BraA09g065110.3C;BraA08g014550.3C;BraA06g010900.3C;BraA10g019550.3C;BraA03g044430.3C;BraA05g039590.3C;BraA05g015370.3C;BraA03g010420.3C;BraA09g059170.3C;BraA01g025720.3C;BraA08g020670.3C;BraA06g035950.3C;BraA05g031980.3C;BraA09g004030.3C;BraA07g031640.3C;BraA03g0…	0.392517
GO:0003777	microtubule motor activity	molecular_function	BraA08g009490.3C;BraA02g013740.3C;BraA08g022690.3C;BraA06g044610.3C;BraA01g025440.3C;BraA02g039270.3C;BraA09g041480.3C;BraA06g044620.3C;BraA07g014260.3C;BraA08g023200.3C;BraA06g014180.3C;BraA08g002220.3C;BraA09g013270.3C;BraA02g040780.3C;BraA01g035880.3C;BraA01g026000.3C;BraA01g039240.3C;BraA03g009450.3C;BraA04g007680.3C;BraA09g009860.3C;BraA06g044600.3C;BraA03g037370.3C;BraA03g004290.3C;BraA05g0…	0.39428
GO:0004596	peptide alpha-N-acetyltransferase activity	molecular_function	BraA03g048390.3C;BraA06g021410.3C;BraA06g023780.3C;BraA05g000240.3C;BraA01g001310.3C;BraA07g043030.3C;BraA05g007490.3C;BraA01g031130.3C;BraA02g025930.3C;BraA07g004770.3C;BraA04g018220.3C;BraA01g019040.3C;BraA03g060830.3C;BraA04g031730.3C;BraA07g042680.3C;BraA01g039640.3C;BraA10g016320.3C;BraA05g019890.3C;BraA07g025790.3C;BraA04g027500.3C;BraA09g017120.3C;BraA08g021550.3C;BraA05g018000.3C;BraA07g0…	0.39566
GO:0004379	glycylpeptide N-tetradecanoyltransferase activity	molecular_function	BraA04g032320.3C;BraA01g016820.3C;BraA10g014910.3C	0.396503
GO:0006537	glutamate biosynthetic process	biological_process	BraA04g029120.3C;BraA03g021860.3C;BraA03g021850.3C	0.396503
GO:0003992	N2-acetyl-L-ornithine:2-oxoglutarate 5-aminotransferase activity	molecular_function	BraA07g042900.3C;BraA02g025720.3C;BraA02g025760.3C	0.396503
GO:0004591	oxoglutarate dehydrogenase (succinyl-transferring) activity	molecular_function	BraA09g020910.3C;BraA06g029260.3C;BraA07g022040.3C	0.396503
GO:0004106	chorismate mutase activity	molecular_function	BraA06g036510.3C;BraA09g003780.3C;BraA02g038650.3C	0.396503
GO:0005847	mRNA cleavage and polyadenylation specificity factor complex	cellular_component	BraA03g005770.3C;BraA02g004930.3C;BraA02g000230.3C	0.396503
GO:0004829	threonine-tRNA ligase activity	molecular_function	BraA06g033570.3C;BraA09g057330.3C;BraA09g005380.3C	0.396503
GO:0003873	6-phosphofructo-2-kinase activity	molecular_function	BraA09g063550.3C;BraA08g033750.3C;BraA10g005710.3C	0.396503
GO:0000124	SAGA complex	cellular_component	BraA09g003090.3C;BraA09g001000.3C;BraA06g037860.3C	0.396503
GO:0000035	acyl binding	molecular_function	BraA10g020210.3C;BraA02g008850.3C;BraA03g009590.3C	0.396503
GO:0006464	cellular protein modification process	biological_process	BraA01g006720.3C;BraA08g017750.3C;BraA09g011190.3C	0.396503
GO:0004418	hydroxymethylbilane synthase activity	molecular_function	BraA10g030600.3C;BraA02g002650.3C;BraA03g003420.3C	0.396503
GO:0000002	mitochondrial genome maintenance	biological_process	BraA03g033640.3C;BraA07g008740.3C;BraA08g004980.3C	0.396503
GO:0004044	amidophosphoribosyltransferase activity	molecular_function	BraA01g000160.3C;BraA01g003570.3C;BraA07g004500.3C	0.396503
GO:0004612	phosphoenolpyruvate carboxykinase (ATP) activity	molecular_function	BraA01g001150.3C;BraA06g029190.3C;BraA02g045310.3C	0.396503
GO:0000973	posttranscriptional tethering of RNA polymerase II gene DNA at nuclear periphery	biological_process	BraA02g025620.3C;BraA02g025630.3C;BraA07g025910.3C	0.396503
GO:0004723	calcium-dependent protein serine/threonine phosphatase activity	molecular_function	BraA06g031590.3C;BraA09g006200.3C;BraA02g042270.3C	0.396503
GO:0006754	ATP biosynthetic process	biological_process	BraA09g025620.3C;BraA02g027600.3C;BraA03g028250.3C	0.396503
GO:0004314	[acyl-carrier-protein] S-malonyltransferase activity	molecular_function	BraA04g021500.3C;BraA03g016080.3C;BraA05g014050.3C	0.396503
GO:0004820	glycine-tRNA ligase activity	molecular_function	BraA07g010800.3C;BraA07g027890.3C;BraA09g035190.3C	0.396503
GO:0001676	long-chain fatty acid metabolic process	biological_process	BraA03g032440.3C;BraA05g039380.3C;BraA06g033900.3C	0.396503
GO:0000407	pre-autophagosomal structure	cellular_component	BraA01g021660.3C;BraA08g011000.3C;BraA09g064450.3C	0.396503
GO:0000340	RNA 7-methylguanosine cap binding	molecular_function	BraA05g015220.3C;BraA04g009570.3C;BraA08g009170.3C	0.396503
GO:0001047	core promoter binding	molecular_function	BraA10g031980.3C;BraA09g018190.3C;BraA08g001470.3C	0.396503
GO:0004455	ketol-acid reductoisomerase activity	molecular_function	BraA04g002670.3C;BraA07g023500.3C;BraA09g048840.3C	0.396503
GO:0009658	chloroplast organization	biological_process	BraA06g007820.3C;BraA09g025270.3C;BraA03g051790.3C	0.396503
GO:0004671	protein C-terminal S-isoprenylcysteine carboxyl O-methyltransferase activity	molecular_function	BraA03g003470.3C;BraA10g030650.3C;BraA03g063210.3C	0.396503
GO:0004794	L-threonine ammonia-lyase activity	molecular_function	BraA03g033650.3C;BraA01g040520.3C;BraA05g036600.3C	0.396503
GO:0003910	DNA ligase (ATP) activity	molecular_function	BraA10g018930.3C;BraA07g032330.3C;BraA05g037220.3C	0.396503
GO:0003688	DNA replication origin binding	molecular_function	BraA03g025880.3C;BraA02g034380.3C;BraA06g040740.3C	0.396503
GO:0004347	glucose-6-phosphate isomerase activity	molecular_function	BraA01g015390.3C;BraA03g052000.3C;BraA09g019380.3C	0.396503
GO:0000427	plastid-encoded plastid RNA polymerase complex	cellular_component	BraA04g027570.3C;BraA08g013990.3C;BraA05g010460.3C	0.396503
GO:0008047	enzyme activator activity	molecular_function	BraA02g017880.3C;BraA07g033110.3C;BraA10g008570.3C	0.396503
GO:0005354	galactose transmembrane transporter activity	molecular_function	BraA02g010760.3C;BraA10g017580.3C;BraA03g011160.3C	0.396503
GO:0000791	euchromatin	cellular_component	BraA03g008110.3C;BraA02g007170.3C;BraA10g022360.3C	0.396503
GO:0004438	phosphatidylinositol-3-phosphatase activity	molecular_function	BraA01g040190.3C;BraA10g031770.3C;BraA02g001410.3C	0.396503
GO:0002764	immune response-regulating signaling pathway	biological_process	BraA10g020140.3C;BraA03g009640.3C;BraA02g031530.3C	0.396503
GO:0009295	nucleoid	cellular_component	BraA07g038570.3C;BraA04g008410.3C;BraA02g025880.3C	0.396503
GO:0008146	sulfotransferase activity	molecular_function	BraA03g045180.3C;BraA01g004960.3C;BraA03g057640.3C	0.396503
GO:0005223	intracellular cGMP activated cation channel activity	molecular_function	BraA04g017580.3C;BraA09g054020.3C;BraA02g011940.3C	0.396503
GO:0000993	RNA polymerase II core binding	molecular_function	BraA03g042170.3C;BraA04g026000.3C;BraA09g025460.3C	0.396503
GO:0003846	2-acylglycerol O-acyltransferase activity	molecular_function	BraA05g017550.3C;BraA05g017560.3C;BraA06g001830.3C	0.396503
GO:0004663	Rab geranylgeranyltransferase activity	molecular_function	BraA03g051890.3C;BraA01g015270.3C;BraA10g026110.3C	0.396503
GO:0000249	C-22 sterol desaturase activity	molecular_function	BraA05g010620.3C;BraA04g024680.3C;BraA04g024690.3C	0.396503
GO:0006807	nitrogen compound metabolic process	biological_process	BraA04g019760.3C;BraA01g029270.3C;BraA09g020730.3C	0.396503
GO:0000785	chromatin	cellular_component	BraA09g008000.3C;BraA03g004650.3C;BraA01g002890.3C;BraA03g059550.3C;BraA08g022640.3C;BraA07g015590.3C;BraA02g044330.3C;BraA05g031460.3C;BraA08g014900.3C;BraA03g001650.3C;BraA08g017890.3C;BraA10g026670.3C;BraA03g050060.3C;BraA06g033880.3C;BraA07g032700.3C;BraA06g027290.3C;BraA10g012400.3C;BraA06g016170.3C	0.401873
GO:0000290	deadenylation-dependent decapping of nuclear-transcribed mRNA	biological_process	BraA04g012990.3C;BraA01g037520.3C;BraA04g012900.3C;BraA06g005570.3C;BraA04g012920.3C;BraA10g025270.3C;BraA07g026370.3C;BraA04g012880.3C;BraA04g012890.3C;BraA05g032990.3C;BraA04g013020.3C;BraA07g042120.3C;BraA04g012910.3C;BraA08g033220.3C;BraA09g062810.3C	0.404766
GO:0004702	receptor signaling protein serine/threonine kinase activity	molecular_function	BraA03g030760.3C;BraA02g013540.3C;BraA09g015090.3C;BraA05g012410.3C;BraA03g013580.3C;BraA03g035970.3C;BraA02g039020.3C;BraA07g016850.3C;BraA10g013110.3C;BraA01g001700.3C;BraA10g014500.3C;BraA08g010570.3C;BraA05g033580.3C;BraA10g003690.3C;BraA01g044500.3C	0.404766
GO:0000243	commitment complex	cellular_component	BraA06g041910.3C;BraA06g035680.3C;BraA05g038090.3C;BraA05g033200.3C;BraA03g028880.3C;BraA08g035070.3C;BraA03g028690.3C;BraA10g002590.3C;BraA08g027770.3C;BraA01g041430.3C;BraA06g016070.3C;BraA02g030020.3C	0.407235
GO:0000164	protein phosphatase type 1 complex	cellular_component	BraA04g022590.3C;BraA05g006230.3C;BraA05g013360.3C;BraA06g020080.3C;BraA03g024710.3C;BraA02g011220.3C;BraA09g013570.3C;BraA03g052580.3C;BraA10g017040.3C;BraA10g010610.3C;BraA03g015080.3C;BraA03g021110.3C	0.407235
GO:0001678	cellular glucose homeostasis	biological_process	BraA05g027230.3C;BraA05g019040.3C;BraA01g001180.3C;BraA06g003260.3C;BraA08g002960.3C;BraA10g006310.3C	0.407511
GO:0004559	alpha-mannosidase activity	molecular_function	BraA09g037000.3C;BraA08g023620.3C;BraA03g006030.3C;BraA06g038110.3C;BraA09g035020.3C;BraA02g030710.3C	0.407511
GO:0004326	tetrahydrofolylpolyglutamate synthase activity	molecular_function	BraA02g001870.3C;BraA01g040490.3C;BraA03g041880.3C;BraA06g041950.3C;BraA03g002270.3C;BraA02g025830.3C	0.407511
GO:0004853	uroporphyrinogen decarboxylase activity	molecular_function	BraA04g028660.3C;BraA08g015380.3C;BraA05g001750.3C;BraA07g018900.3C;BraA07g018890.3C;BraA03g036710.3C	0.407511
GO:0005525	GTP binding	molecular_function	BraA07g025080.3C;BraA10g020270.3C;BraA07g005460.3C;BraA10g022860.3C;BraA02g032400.3C;BraA06g017420.3C;BraA03g007200.3C;BraA04g010560.3C;BraA03g051780.3C;BraA08g026450.3C;BraA09g008890.3C;BraA09g002110.3C;BraA07g025960.3C;BraA07g042760.3C;BraA09g031450.3C;BraA01g022530.3C;BraA05g034830.3C;BraA06g007120.3C;BraA06g007130.3C;BraA01g020610.3C;BraA03g015070.3C;BraA05g000690.3C;BraA10g010620.3C;BraA03g0…	0.40818
GO:0000790	nuclear chromatin	cellular_component	BraA01g032950.3C;BraA05g027290.3C;BraA07g006810.3C;BraA09g025780.3C;BraA03g026840.3C;BraA08g002610.3C;BraA05g018590.3C;BraA10g014620.3C;BraA02g000540.3C	0.408703
GO:0001664	G-protein coupled receptor binding	molecular_function	BraA05g023840.3C;BraA01g003860.3C;BraA09g052740.3C;BraA04g017230.3C;BraA09g033240.3C;BraA08g016010.3C;BraA03g058800.3C;BraA06g026330.3C;BraA01g003870.3C	0.408703
GO:0000166	nucleotide binding	molecular_function	BraA03g035390.3C;BraA08g015960.3C;BraA04g004570.3C;BraA09g017880.3C;BraA03g000750.3C;BraA05g015200.3C;BraA08g006200.3C;BraA10g002010.3C;BraA05g036210.3C;BraA08g008270.3C;BraA01g009330.3C;BraA09g019340.3C;BraA03g031660.3C;BraA03g030610.3C;BraA06g043470.3C;BraA05g029520.3C;BraA04g023990.3C;BraA03g043960.3C;BraA04g019240.3C;BraA06g010940.3C;BraA09g039380.3C;BraA06g005430.3C;BraA05g027470.3C;BraA02g0…	0.419863
GO:0004683	calmodulin-dependent protein kinase activity	molecular_function	BraA08g030830.3C;BraA07g017690.3C;BraA09g009710.3C;BraA04g029100.3C;BraA05g013210.3C;BraA01g023000.3C;BraA07g022920.3C;BraA03g021800.3C;BraA09g060630.3C;BraA06g031040.3C;BraA03g039380.3C;BraA07g039450.3C;BraA09g041690.3C;BraA06g009060.3C;BraA04g025500.3C;BraA02g042460.3C;BraA03g064470.3C;BraA05g006890.3C;BraA03g059380.3C;BraA09g048110.3C;BraA04g029090.3C;BraA05g005970.3C;BraA04g027460.3C;BraA01g0…	0.431572
GO:0005615	extracellular space	cellular_component	BraA07g040450.3C;BraA01g009410.3C;BraA02g019280.3C;BraA03g047800.3C;BraA07g030310.3C;BraA09g064630.3C;BraA02g036670.3C;BraA01g028310.3C;BraA02g037620.3C;BraA06g037700.3C;BraA09g037890.3C;BraA02g009990.3C;BraA07g027160.3C;BraA07g012810.3C;BraA02g038170.3C;BraA07g028880.3C;BraA10g007030.3C	0.450506
GO:0004335	galactokinase activity	molecular_function	BraA01g020740.3C;BraA08g011610.3C;BraA10g024580.3C;BraA10g000200.3C;BraA10g026520.3C;BraA10g000190.3C;BraA04g001400.3C;BraA07g013320.3C;BraA10g024590.3C;BraA01g041960.3C;BraA05g038870.3C;BraA09g066040.3C;BraA10g013940.3C;BraA03g032760.3C	0.458476
GO:0004430	1-phosphatidylinositol 4-kinase activity	molecular_function	BraA05g018610.3C;BraA06g027540.3C;BraA04g028940.3C;BraA03g021680.3C;BraA09g006220.3C;BraA03g024210.3C;BraA09g047250.3C;BraA02g044430.3C;BraA06g002890.3C;BraA06g009900.3C;BraA05g019790.3C;BraA06g038970.3C;BraA06g003960.3C;BraA06g031580.3C	0.458476
GO:0005509	calcium ion binding	molecular_function	BraA09g064200.3C;BraA08g034600.3C;BraA09g004550.3C;BraA10g030900.3C;BraA09g049660.3C;BraA03g033290.3C;BraA05g040620.3C;BraA10g003750.3C;BraA09g024970.3C;BraA09g004690.3C;BraA03g053190.3C;BraA04g032180.3C;BraA01g043670.3C;BraA01g006710.3C;BraA08g035100.3C;BraA01g026740.3C;BraA06g010290.3C;BraA10g027640.3C;BraA01g004990.3C;BraA02g045720.3C;BraA06g044720.3C;BraA03g017710.3C;BraA09g063780.3C;BraA09g0…	0.464011
GO:0004372	glycine hydroxymethyltransferase activity	molecular_function	BraA01g001110.3C;BraA01g005570.3C;BraA04g008160.3C;BraA07g035910.3C;BraA07g029630.3C;BraA09g040930.3C;BraA01g005080.3C;BraA08g006110.3C;BraA08g005730.3C;BraA08g021770.3C;BraA08g007700.3C	0.467957
GO:0003747	translation release factor activity	molecular_function	BraA06g008870.3C;BraA09g052200.3C;BraA09g031590.3C;BraA03g062070.3C;BraA08g009710.3C;BraA08g009720.3C;BraA06g035940.3C;BraA01g018430.3C;BraA05g015130.3C;BraA04g000500.3C;BraA05g000820.3C	0.467957
GO:0002161	aminoacyl-tRNA editing activity	molecular_function	BraA02g039960.3C;BraA09g062290.3C;BraA06g010780.3C;BraA04g014520.3C;BraA03g050110.3C;BraA06g035010.3C;BraA03g028120.3C;BraA08g005690.3C;BraA07g013500.3C;BraA09g059260.3C;BraA10g007460.3C	0.467957
GO:0004176	ATP-dependent peptidase activity	molecular_function	BraA08g033920.3C;BraA09g052830.3C;BraA07g032970.3C;BraA05g013660.3C;BraA06g041360.3C;BraA09g061230.3C;BraA09g030650.3C;BraA06g015280.3C;BraA03g014510.3C;BraA09g052940.3C;BraA10g011690.3C;BraA05g042490.3C;BraA09g057160.3C;BraA04g019170.3C;BraA06g028040.3C;BraA10g005170.3C;BraA07g026170.3C;BraA10g016700.3C;BraA09g063270.3C;BraA04g023410.3C;BraA04g020800.3C;BraA06g019820.3C;BraA06g014320.3C;BraA10g0…	0.472225
GO:0000184	nuclear-transcribed mRNA catabolic process, nonsense-mediated decay	biological_process	BraA03g032720.3C;BraA01g044800.3C;BraA10g020920.3C;BraA02g005570.3C;BraA09g007680.3C;BraA09g022460.3C;BraA02g033470.3C;BraA02g008160.3C	0.48005
GO:0005247	voltage-gated chloride channel activity	molecular_function	BraA04g015280.3C;BraA06g033240.3C;BraA06g037830.3C;BraA06g000470.3C;BraA08g000460.3C;BraA02g016360.3C;BraA02g037480.3C;BraA08g009470.3C	0.48005
GO:0000784	nuclear chromosome, telomeric region	cellular_component	BraA08g033710.3C;BraA05g019530.3C;BraA06g003600.3C;BraA09g041170.3C;BraA01g023400.3C;BraA03g044890.3C;BraA09g008880.3C;BraA08g003280.3C	0.48005
GO:0005319	lipid transporter activity	molecular_function	BraA07g018450.3C;BraA08g023050.3C;BraA05g026930.3C;BraA04g020050.3C;BraA01g033110.3C;BraA03g054370.3C;BraA09g042870.3C;BraA06g015350.3C	0.48005
GO:0004521	endoribonuclease activity	molecular_function	BraA09g021530.3C;BraA01g019920.3C;BraA06g031700.3C;BraA06g030450.3C;BraA01g033050.3C;BraA01g019930.3C;BraA03g039370.3C;BraA05g042580.3C	0.48005
GO:0000123	histone acetyltransferase complex	cellular_component	BraA08g003690.3C;BraA01g001580.3C;BraA04g005320.3C;BraA07g041000.3C;BraA04g007610.3C;BraA02g024440.3C;BraA09g045440.3C;BraA04g005280.3C	0.48005
GO:0000932	cytoplasmic mRNA processing body	cellular_component	BraA09g052470.3C;BraA03g002940.3C;BraA02g026530.3C;BraA09g020370.3C;BraA09g007450.3C;BraA05g011230.3C;BraA07g012880.3C;BraA09g000470.3C;BraA09g065390.3C;BraA04g000150.3C;BraA06g043220.3C;BraA09g007490.3C;BraA08g005360.3C;BraA03g028990.3C;BraA02g043190.3C;BraA10g001690.3C;BraA06g025290.3C;BraA04g027950.3C;BraA10g006830.3C	0.490376
GO:0000220	vacuolar proton-transporting V-type ATPase, V0 domain	cellular_component	BraA05g015360.3C;BraA03g059000.3C;BraA07g041770.3C;BraA03g024870.3C;BraA06g015530.3C;BraA05g041730.3C;BraA08g019490.3C;BraA08g015760.3C;BraA01g000260.3C;BraA08g022670.3C;BraA03g043170.3C;BraA02g020410.3C;BraA03g019850.3C;BraA07g018920.3C;BraA04g015650.3C;BraA07g041780.3C;BraA08g022740.3C;BraA08g028030.3C;BraA01g003590.3C	0.490376
GO:0005871	kinesin complex	cellular_component	BraA09g045700.3C;BraA04g020460.3C;BraA06g009220.3C;BraA06g009230.3C;BraA04g025750.3C	0.497924
GO:0000256	allantoin catabolic process	biological_process	BraA06g043670.3C;BraA02g030700.3C;BraA01g008890.3C;BraA01g019500.3C;BraA03g047310.3C	0.497924
GO:0004751	ribose-5-phosphate isomerase activity	molecular_function	BraA06g040640.3C;BraA05g040340.3C;BraA06g043030.3C;BraA02g020240.3C;BraA01g042920.3C	0.497924
GO:0000070	mitotic sister chromatid segregation	biological_process	BraA03g063680.3C;BraA04g009480.3C;BraA06g007810.3C;BraA08g017510.3C;BraA03g056550.3C	0.497924
GO:0005249	voltage-gated potassium channel activity	molecular_function	BraA03g013650.3C;BraA09g053810.3C;BraA01g034820.3C;BraA07g018660.3C;BraA04g013910.3C	0.497924
GO:0000712	resolution of meiotic recombination intermediates	biological_process	BraA03g015030.3C;BraA02g044360.3C;BraA06g027370.3C;BraA01g008580.3C;BraA06g035610.3C	0.497924
GO:0032502	developmental process	biological_process	BraA03g004380.3C;BraA05g017060.3C;BraA05g017280.3C;BraA01g007660.3C;BraA06g021650.3C	0.497924
GO:0003958	NADPH-hemoprotein reductase activity	molecular_function	BraA01g015300.3C;BraA01g015310.3C;BraA03g030870.3C;BraA05g025480.3C;BraA03g051910.3C	0.497924
GO:0000494	box C/D snoRNA 3'-end processing	biological_process	BraA10g010750.3C;BraA02g015320.3C;BraA01g029160.3C;BraA01g016360.3C;BraA03g052690.3C	0.497924
GO:0000086	G2/M transition of mitotic cell cycle	biological_process	BraA05g028580.3C;BraA06g021810.3C;BraA07g040180.3C;BraA05g013020.3C;BraA06g021820.3C	0.497924
GO:0004072	aspartate kinase activity	molecular_function	BraA09g033770.3C;BraA02g004760.3C;BraA03g006100.3C;BraA10g025480.3C;BraA01g011040.3C	0.497924
GO:0003857	3-hydroxyacyl-CoA dehydrogenase activity	molecular_function	BraA01g008530.3C;BraA09g060990.3C;BraA01g040180.3C;BraA03g054820.3C;BraA05g031880.3C	0.497924
GO:0004475	mannose-1-phosphate guanylyltransferase activity	molecular_function	BraA03g055960.3C;BraA03g055870.3C;BraA03g021070.3C;BraA05g006280.3C;BraA04g027980.3C	0.497924
GO:0005544	calcium-dependent phospholipid binding	molecular_function	BraA06g025410.3C;BraA09g045960.3C;BraA02g043260.3C;BraA09g062580.3C;BraA02g043270.3C	0.497924
GO:0002230	positive regulation of defense response to virus by host	biological_process	BraA06g031940.3C;BraA10g024340.3C;BraA03g006570.3C;BraA03g059940.3C;BraA09g006090.3C	0.497924
GO:0000156	phosphorelay response regulator activity	molecular_function	BraA06g034890.3C;BraA05g042450.3C;BraA07g031180.3C;BraA07g033390.3C;BraA06g007290.3C;BraA04g018620.3C;BraA10g032970.3C;BraA01g024740.3C;BraA04g003520.3C;BraA10g017830.3C;BraA08g028390.3C;BraA09g017500.3C;BraA02g000630.3C;BraA04g004060.3C;BraA03g057090.3C;BraA01g020760.3C;BraA07g033540.3C;BraA02g002270.3C;BraA06g018810.3C;BraA03g046670.3C;BraA09g006930.3C;BraA02g035050.3C;BraA09g006120.3C;BraA03g0…	0.498198
GO:0005507	copper ion binding	molecular_function	BraA08g009910.3C;BraA04g023210.3C;BraA02g027860.3C;BraA05g028770.3C;BraA08g018010.3C;BraA08g017270.3C;BraA03g011020.3C;BraA07g025460.3C;BraA01g025460.3C;BraA04g022250.3C;BraA10g033280.3C;BraA02g042050.3C;BraA04g006150.3C;BraA04g029900.3C;BraA01g038160.3C;BraA09g064020.3C;BraA07g017000.3C;BraA03g014290.3C;BraA10g017800.3C;BraA10g014210.3C;BraA07g010070.3C;BraA10g019910.3C;BraA06g031930.3C;BraA01g0…	0.5011
GO:0003729	mRNA binding	molecular_function	BraA02g001160.3C;BraA06g011370.3C;BraA08g020030.3C;BraA03g052610.3C;BraA02g024820.3C;BraA09g047350.3C;BraA06g004220.3C;BraA08g029120.3C;BraA02g015710.3C;BraA04g007150.3C;BraA01g001730.3C;BraA08g005630.3C;BraA01g016300.3C;BraA08g004120.3C;BraA10g032340.3C;BraA05g020010.3C	0.501658
GO:0003684	damaged DNA binding	molecular_function	BraA06g003570.3C;BraA10g023520.3C;BraA04g011090.3C;BraA03g011650.3C;BraA06g012160.3C;BraA06g017250.3C;BraA09g052750.3C;BraA04g019230.3C;BraA09g058350.3C;BraA07g019540.3C;BraA03g026270.3C;BraA05g017740.3C;BraA06g042830.3C;BraA08g014540.3C;BraA06g042820.3C;BraA02g011460.3C	0.501658
GO:0005773	vacuole	cellular_component	BraA03g024550.3C;BraA02g019330.3C;BraA03g036700.3C;BraA05g025220.3C;BraA02g019340.3C;BraA01g008740.3C;BraA03g052100.3C;BraA06g022550.3C;BraA09g003960.3C;BraA03g040570.3C;BraA04g003550.3C;BraA04g003530.3C;BraA03g051320.3C;BraA01g016670.3C;BraA01g037010.3C;BraA05g033870.3C;BraA01g022400.3C;BraA05g015340.3C;BraA07g031610.3C;BraA02g022050.3C;BraA07g024230.3C;BraA01g015590.3C;BraA07g011460.3C;BraA09g0…	0.504003
GO:0000462	maturation of SSU-rRNA from tricistronic rRNA transcript (SSU-rRNA, 5.8S rRNA, LSU-rRNA)	biological_process	BraA03g009570.3C;BraA04g030160.3C;BraA09g010820.3C;BraA07g003770.3C;BraA02g008820.3C;BraA09g038890.3C;BraA03g022930.3C;BraA10g020280.3C;BraA03g056320.3C;BraA06g042840.3C;BraA03g032750.3C;BraA06g020110.3C;BraA05g038910.3C	0.515337
GO:0006810	transport	biological_process	BraA04g032450.3C;BraA03g051540.3C;BraA07g035470.3C;BraA02g031130.3C;BraA01g036020.3C;BraA10g019420.3C;BraA06g012020.3C;BraA08g021760.3C;BraA05g030950.3C;BraA02g020050.3C	0.532898
GO:0000210	NAD+ diphosphatase activity	molecular_function	BraA02g008670.3C;BraA03g046640.3C;BraA09g022880.3C;BraA06g040950.3C;BraA02g032330.3C;BraA02g018670.3C;BraA08g011540.3C;BraA08g028820.3C;BraA01g016230.3C;BraA01g020840.3C	0.532898
GO:0001054	RNA polymerase I activity	molecular_function	BraA04g021160.3C;BraA04g003160.3C;BraA03g012140.3C;BraA01g028380.3C;BraA07g010790.3C;BraA07g022990.3C;BraA03g062440.3C;BraA07g010760.3C;BraA09g016900.3C;BraA09g048220.3C	0.532898
GO:0000150	recombinase activity	molecular_function	BraA03g012430.3C;BraA08g033440.3C;BraA02g024990.3C;BraA05g005040.3C;BraA01g031330.3C;BraA10g019820.3C;BraA04g020420.3C;BraA07g001330.3C;BraA09g056590.3C;BraA07g026380.3C	0.532898
GO:0002679	respiratory burst involved in defense response	biological_process	BraA04g025550.3C;BraA04g006930.3C;BraA09g014740.3C;BraA09g043610.3C;BraA05g035100.3C;BraA03g018810.3C;BraA03g034990.3C;BraA06g014840.3C;BraA01g039350.3C;BraA10g010310.3C	0.532898
GO:0000723	telomere maintenance	biological_process	BraA07g002530.3C;BraA01g026290.3C;BraA05g016390.3C;BraA05g026240.3C;BraA09g040430.3C;BraA08g010950.3C;BraA10g029020.3C;BraA03g034700.3C;BraA02g021650.3C;BraA03g054400.3C;BraA01g032750.3C;BraA03g025080.3C;BraA03g049100.3C;BraA09g055210.3C;BraA09g043380.3C;BraA08g004790.3C;BraA03g005930.3C;BraA05g026830.3C;BraA09g063360.3C;BraA02g034270.3C;BraA05g016380.3C;BraA08g031880.3C;BraA10g012050.3C;BraA09g0…	0.537036
GO:0003779	actin binding	molecular_function	BraA03g013810.3C;BraA03g055480.3C;BraA04g007980.3C;BraA05g024420.3C;BraA09g001530.3C;BraA03g022060.3C;BraA03g003150.3C;BraA05g014370.3C;BraA10g015210.3C;BraA05g002430.3C;BraA01g031450.3C;BraA06g004590.3C;BraA08g018230.3C;BraA06g029580.3C;BraA02g010580.3C;BraA02g038390.3C;BraA07g010310.3C;BraA03g033310.3C;BraA04g014500.3C;BraA10g002020.3C;BraA05g039780.3C;BraA10g030270.3C;BraA05g015850.3C;BraA03g0…	0.538689
GO:0008168	methyltransferase activity	molecular_function	BraA02g005550.3C;BraA03g022670.3C;BraA10g007230.3C;BraA09g035570.3C;BraA02g005560.3C;BraA07g034420.3C;BraA06g037010.3C;BraA02g017120.3C;BraA07g019420.3C;BraA03g008370.3C;BraA07g034410.3C;BraA04g030400.3C;BraA04g008100.3C;BraA09g007660.3C;BraA08g030580.3C;BraA01g035300.3C;BraA07g004430.3C;BraA09g054780.3C	0.538832
GO:0006066	alcohol metabolic process	biological_process	BraA07g009680.3C;BraA03g040800.3C	0.539719
GO:0000390	spliceosomal complex disassembly	biological_process	BraA06g012880.3C;BraA09g057980.3C	0.539719
GO:0004856	xylulokinase activity	molecular_function	BraA06g019880.3C;BraA09g055580.3C	0.539719
GO:0004888	transmembrane signaling receptor activity	molecular_function	BraA06g012120.3C;BraA02g031600.3C	0.539719
GO:0000455	enzyme-directed rRNA pseudouridine synthesis	biological_process	BraA05g006710.3C;BraA03g045930.3C	0.539719
GO:0000422	mitophagy	biological_process	BraA02g032310.3C;BraA08g022460.3C	0.539719
GO:0004588	orotate phosphoribosyltransferase activity	molecular_function	BraA04g005410.3C;BraA07g021760.3C	0.539719
GO:0000779	condensed chromosome, centromeric region	cellular_component	BraA04g003500.3C;BraA09g047730.3C	0.539719
GO:0000171	ribonuclease MRP activity	molecular_function	BraA05g003470.3C;BraA04g008000.3C	0.539719
GO:0006637	acyl-CoA metabolic process	biological_process	BraA03g030060.3C;BraA02g026460.3C	0.539719
GO:0004808	tRNA (5-methylaminomethyl-2-thiouridylate)-methyltransferase activity	molecular_function	BraA05g018420.3C;BraA08g002750.3C	0.539719
GO:0004329	formate-tetrahydrofolate ligase activity	molecular_function	BraA05g019020.3C;BraA06g003250.3C	0.539719
GO:0000026	alpha-1,2-mannosyltransferase activity	molecular_function	BraA08g029500.3C;BraA06g012760.3C	0.539719
GO:0008422	beta-glucosidase activity	molecular_function	BraA05g038920.3C;BraA01g041990.3C	0.539719
GO:0033365	protein localization to organelle	biological_process	BraA05g002730.3C;BraA04g029690.3C	0.539719
GO:0000247	C-8 sterol isomerase activity	molecular_function	BraA07g016030.3C;BraA06g015610.3C	0.539719
GO:0032543	mitochondrial translation	biological_process	BraA09g028590.3C;BraA03g000860.3C	0.539719
GO:0010269	response to selenium ion	biological_process	BraA04g000120.3C;BraA09g052490.3C	0.539719
GO:0000900	translation repressor activity, nucleic acid binding	molecular_function	BraA04g016520.3C;BraA09g054750.3C	0.539719
GO:0000012	single strand break repair	biological_process	BraA09g062940.3C;BraA06g005380.3C	0.539719
GO:0004673	protein histidine kinase activity	molecular_function	BraA07g031110.3C;BraA05g015210.3C	0.539719
GO:0006069	ethanol oxidation	biological_process	BraA06g043480.3C;BraA09g020130.3C	0.539719
GO:0000796	condensin complex	cellular_component	BraA06g025930.3C;BraA06g019550.3C	0.539719
GO:0006400	tRNA modification	biological_process	BraA03g009380.3C;BraA02g008650.3C	0.539719
GO:0004163	diphosphomevalonate decarboxylase activity	molecular_function	BraA04g005540.3C;BraA09g045230.3C	0.539719
GO:0000703	oxidized pyrimidine nucleobase lesion DNA N-glycosylase activity	molecular_function	BraA03g016720.3C;BraA09g064260.3C	0.539719
GO:0015015	heparan sulfate proteoglycan biosynthetic process, enzymatic modification	biological_process	BraA08g033320.3C;BraA06g005250.3C	0.539719
GO:0008202	steroid metabolic process	biological_process	BraA02g016150.3C;BraA03g026320.3C	0.539719
GO:0005658	alpha DNA polymerase:primase complex	cellular_component	BraA07g016840.3C;BraA02g035980.3C	0.539719
GO:0008654	phospholipid biosynthetic process	biological_process	BraA10g000410.3C;BraA09g066200.3C	0.539719
GO:0000792	heterochromatin	cellular_component	BraA02g033320.3C;BraA09g022420.3C	0.539719
GO:0005778	peroxisomal membrane	cellular_component	BraA09g010170.3C;BraA09g010180.3C	0.539719
GO:0004411	homogentisate 1,2-dioxygenase activity	molecular_function	BraA10g012200.3C;BraA02g014190.3C	0.539719
GO:0003882	CDP-diacylglycerol-serine O-phosphatidyltransferase activity	molecular_function	BraA06g011180.3C;BraA09g058870.3C	0.539719
GO:0016757	transferase activity, transferring glycosyl groups	molecular_function	BraA09g008710.3C;BraA04g020090.3C	0.539719
GO:0003991	acetylglutamate kinase activity	molecular_function	BraA09g048140.3C;BraA04g003210.3C	0.539719
GO:0005771	multivesicular body	cellular_component	BraA02g014530.3C;BraA10g011860.3C	0.539719
GO:0005372	water transmembrane transporter activity	molecular_function	BraA07g042780.3C;BraA02g025580.3C	0.539719
GO:0001881	receptor recycling	biological_process	BraA06g019180.3C;BraA06g024190.3C	0.539719
GO:0000740	nuclear membrane fusion	biological_process	BraA06g035850.3C;BraA02g039340.3C	0.539719
GO:0009641	shade avoidance	biological_process	BraA03g052350.3C;BraA01g016010.3C	0.539719
GO:0004300	enoyl-CoA hydratase activity	molecular_function	BraA08g012080.3C;BraA09g019690.3C	0.539719
GO:0002540	leukotriene production involved in inflammatory response	biological_process	BraA06g022650.3C;BraA02g016830.3C	0.539719
GO:0003866	3-phosphoshikimate 1-carboxyvinyltransferase activity	molecular_function	BraA04g030730.3C;BraA03g023680.3C	0.539719
GO:0000966	RNA 5'-end processing	biological_process	BraA09g013350.3C;BraA09g013110.3C	0.539719
GO:0004333	fumarate hydratase activity	molecular_function	BraA05g000400.3C;BraA01g044230.3C	0.539719
GO:0007568	aging	biological_process	BraA02g012030.3C;BraA10g015910.3C	0.539719
GO:0000281	mitotic cytokinesis	biological_process	BraA05g030130.3C;BraA05g028260.3C	0.539719
GO:0006396	RNA processing	biological_process	BraA04g021240.3C;BraA05g014510.3C	0.539719
GO:0010214	seed coat development	biological_process	BraA05g000300.3C;BraA04g032550.3C	0.539719
GO:0004318	enoyl-[acyl-carrier-protein] reductase (NADH) activity	molecular_function	BraA03g042190.3C;BraA03g042200.3C	0.539719
GO:0030145	manganese ion binding	molecular_function	BraA09g007410.3C;BraA06g026430.3C	0.539719
GO:0004740	pyruvate dehydrogenase (acetyl-transferring) kinase activity	molecular_function	BraA05g038950.3C;BraA03g032730.3C	0.539719
GO:0030173	integral component of Golgi membrane	cellular_component	BraA03g050640.3C;BraA01g013640.3C	0.539719
GO:0003963	RNA-3'-phosphate cyclase activity	molecular_function	BraA10g006360.3C;BraA08g004930.3C	0.539719
GO:0004019	adenylosuccinate synthase activity	molecular_function	BraA04g003190.3C;BraA07g022940.3C	0.539719
GO:0004587	ornithine-oxo-acid transaminase activity	molecular_function	BraA09g021720.3C;BraA06g042040.3C	0.539719
GO:0006024	glycosaminoglycan biosynthetic process	biological_process	BraA02g001390.3C;BraA10g031810.3C	0.539719
GO:0003987	acetate-CoA ligase activity	molecular_function	BraA04g015830.3C;BraA05g030400.3C	0.539719
GO:0004729	oxygen-dependent protoporphyrinogen oxidase activity	molecular_function	BraA10g024790.3C;BraA10g001110.3C	0.539719
GO:0004076	biotin synthase activity	molecular_function	BraA03g022720.3C;BraA05g003530.3C	0.539719
GO:0004371	glycerone kinase activity	molecular_function	BraA05g029810.3C;BraA08g004400.3C	0.539719
GO:0004324	ferredoxin-NADP+ reductase activity	molecular_function	BraA09g024860.3C;BraA09g034540.3C	0.539719
GO:0004368	glycerol-3-phosphate dehydrogenase activity	molecular_function	BraA05g036400.3C;BraA01g040360.3C	0.539719
GO:0004180	carboxypeptidase activity	molecular_function	BraA09g045530.3C;BraA04g005210.3C	0.539719
GO:0031969	chloroplast membrane	cellular_component	BraA08g023330.3C;BraA09g034700.3C	0.539719
GO:0000380	alternative mRNA splicing, via spliceosome	biological_process	BraA10g016050.3C;BraA02g011890.3C	0.539719
GO:0000470	maturation of LSU-rRNA	biological_process	BraA04g000050.3C;BraA07g018220.3C	0.539719
GO:0003837	beta-ureidopropionase activity	molecular_function	BraA09g008240.3C;BraA06g027830.3C	0.539719
GO:0004719	protein-L-isoaspartate (D-aspartate) O-methyltransferase activity	molecular_function	BraA03g026190.3C;BraA06g024450.3C	0.539719
GO:0006268	DNA unwinding involved in DNA replication	biological_process	BraA03g056460.3C;BraA01g006640.3C	0.539719
GO:0000978	RNA polymerase II core promoter proximal region sequence-specific DNA binding	molecular_function	BraA07g004220.3C;BraA03g043400.3C	0.539719
GO:0004427	inorganic diphosphatase activity	molecular_function	BraA02g021420.3C;BraA07g037210.3C	0.539719
GO:0005086	ARF guanyl-nucleotide exchange factor activity	molecular_function	BraA10g020750.3C;BraA06g044970.3C	0.539719
GO:0004126	cytidine deaminase activity	molecular_function	BraA03g055110.3C;BraA07g001260.3C	0.539719
GO:0004629	phospholipase C activity	molecular_function	BraA05g041950.3C;BraA01g043630.3C	0.539719
GO:0002215	defense response to nematode	biological_process	BraA01g020550.3C;BraA10g029410.3C	0.539719
GO:0004496	mevalonate kinase activity	molecular_function	BraA02g040740.3C;BraA09g005020.3C	0.539719
GO:0008483	transaminase activity	molecular_function	BraA03g042440.3C;BraA03g042430.3C	0.539719
GO:0006221	pyrimidine nucleotide biosynthetic process	biological_process	BraA05g028670.3C;BraA03g038450.3C	0.539719
GO:0003913	DNA photolyase activity	molecular_function	BraA05g000340.3C;BraA03g052360.3C	0.539719
GO:0016746	transferase activity, transferring acyl groups	molecular_function	BraA01g043990.3C;BraA05g041520.3C	0.539719
GO:0000463	maturation of LSU-rRNA from tricistronic rRNA transcript (SSU-rRNA, 5.8S rRNA, LSU-rRNA)	biological_process	BraA03g006370.3C;BraA04g027670.3C	0.539719
GO:0000972	transcription-dependent tethering of RNA polymerase II gene DNA at nuclear periphery	biological_process	BraA06g010980.3C;BraA09g059070.3C	0.539719
GO:0004057	arginyltransferase activity	molecular_function	BraA05g035620.3C;BraA10g028490.3C	0.539719
GO:0008289	lipid binding	molecular_function	BraA10g012340.3C;BraA03g014060.3C	0.539719
GO:0000919	cell plate assembly	biological_process	BraA05g027560.3C;BraA10g031130.3C	0.539719
GO:0008253	5'-nucleotidase activity	molecular_function	BraA03g057720.3C;BraA01g004850.3C	0.539719
GO:0004012	phospholipid-translocating ATPase activity	molecular_function	BraA06g037320.3C;BraA06g043230.3C	0.539719
GO:0004826	phenylalanine-tRNA ligase activity	molecular_function	BraA06g000400.3C;BraA01g017230.3C	0.539719
GO:0004641	phosphoribosylformylglycinamidine cyclo-ligase activity	molecular_function	BraA07g021980.3C;BraA09g045900.3C	0.539719
GO:0000032	cell wall mannoprotein biosynthetic process	biological_process	BraA09g053330.3C;BraA04g018580.3C	0.539719
GO:0003899	DNA-directed RNA polymerase activity	molecular_function	BraA07g041070.3C;BraA09g029210.3C	0.539719
GO:0005943	phosphatidylinositol 3-kinase complex, class IA	cellular_component	BraA06g016980.3C;BraA07g015170.3C	0.539719
GO:0003980	UDP-glucose:glycoprotein glucosyltransferase activity	molecular_function	BraA07g029690.3C;BraA07g035830.3C	0.539719
GO:0003868	4-hydroxyphenylpyruvate dioxygenase activity	molecular_function	BraA10g005300.3C;BraA09g063880.3C	0.539719
GO:0004107	chorismate synthase activity	molecular_function	BraA05g020020.3C;BraA08g004150.3C	0.539719
GO:0001933	negative regulation of protein phosphorylation	biological_process	BraA10g002490.3C;BraA09g065160.3C	0.539719
GO:0005519	cytoskeletal regulatory protein binding	molecular_function	BraA02g040560.3C;BraA06g034220.3C	0.539719
GO:0004760	serine-pyruvate transaminase activity	molecular_function	BraA03g042340.3C;BraA09g010000.3C	0.539719
GO:0004352	glutamate dehydrogenase (NAD+) activity	molecular_function	BraA02g002350.3C;BraA03g002960.3C	0.539719
GO:0000789	cytoplasmic chromatin	cellular_component	BraA02g017520.3C;BraA07g032580.3C	0.539719
GO:0005484	SNAP receptor activity	molecular_function	BraA03g041300.3C;BraA09g059840.3C	0.539719
GO:0009626	plant-type hypersensitive response	biological_process	BraA02g023960.3C;BraA07g040680.3C	0.539719
GO:0004930	G-protein coupled receptor activity	molecular_function	BraA06g038500.3C;BraA09g024700.3C	0.539719
GO:0005876	spindle microtubule	cellular_component	BraA06g036200.3C;BraA09g003940.3C	0.539719
GO:0003743	translation initiation factor activity	molecular_function	BraA01g017830.3C;BraA07g013150.3C;BraA10g009810.3C;BraA07g007400.3C;BraA07g035920.3C;BraA03g023930.3C;BraA09g014050.3C;BraA10g012990.3C;BraA05g010680.3C;BraA06g029340.3C;BraA10g026350.3C;BraA03g056310.3C;BraA04g017640.3C;BraA09g024820.3C;BraA04g011180.3C;BraA05g038360.3C;BraA08g027440.3C;BraA01g030600.3C;BraA09g014060.3C;BraA02g023700.3C;BraA09g038480.3C;BraA07g007110.3C;BraA03g005030.3C;BraA08g0…	0.552245
GO:0003697	single-stranded DNA binding	molecular_function	BraA02g041010.3C;BraA09g001260.3C;BraA05g028780.3C;BraA02g020860.3C;BraA09g034320.3C;BraA06g033580.3C;BraA09g033930.3C;BraA03g049040.3C;BraA03g044000.3C;BraA01g034310.3C;BraA07g038180.3C;BraA06g037220.3C;BraA02g027390.3C;BraA06g042800.3C;BraA09g027560.3C	0.554707
GO:0000162	tryptophan biosynthetic process	biological_process	BraA09g011320.3C;BraA08g031570.3C;BraA08g031560.3C;BraA09g045470.3C;BraA04g014870.3C;BraA02g042740.3C;BraA02g022810.3C;BraA03g024690.3C;BraA10g012880.3C;BraA08g007500.3C;BraA03g002200.3C;BraA10g022130.3C;BraA03g041700.3C;BraA07g019650.3C;BraA09g006740.3C;BraA07g030400.3C;BraA07g034260.3C;BraA04g011130.3C;BraA02g042730.3C;BraA09g001590.3C;BraA03g043830.3C;BraA03g053490.3C;BraA09g037560.3C	0.556941
GO:0004470	malic enzyme activity	molecular_function	BraA07g027600.3C;BraA06g032990.3C;BraA09g000510.3C;BraA09g010020.3C;BraA03g058340.3C;BraA02g004070.3C;BraA03g004740.3C	0.557741
GO:0009672	auxin:proton symporter activity	molecular_function	BraA02g045830.3C;BraA07g027360.3C;BraA08g002840.3C;BraA02g023530.3C;BraA06g016380.3C;BraA05g018320.3C;BraA07g035760.3C	0.557741
GO:0004345	glucose-6-phosphate dehydrogenase activity	molecular_function	BraA10g025630.3C;BraA07g020310.3C;BraA09g003170.3C;BraA08g009110.3C;BraA08g025060.3C;BraA06g037720.3C;BraA07g012320.3C	0.557741
GO:0004386	helicase activity	molecular_function	BraA09g058090.3C;BraA06g005280.3C;BraA09g062970.3C;BraA04g028880.3C;BraA04g005420.3C;BraA01g021120.3C;BraA07g018630.3C	0.557741
GO:0006631	fatty acid metabolic process	biological_process	BraA08g019590.3C;BraA09g009920.3C;BraA05g023690.3C;BraA02g040290.3C;BraA03g040860.3C;BraA02g008880.3C;BraA06g005760.3C	0.557741
GO:0004416	hydroxyacylglutathione hydrolase activity	molecular_function	BraA05g003580.3C;BraA06g001260.3C;BraA08g001460.3C;BraA04g030340.3C;BraA09g064120.3C;BraA05g013290.3C;BraA05g035960.3C	0.557741
GO:0000293	ferric-chelate reductase activity	molecular_function	BraA09g065480.3C;BraA10g000430.3C;BraA09g033010.3C;BraA02g042340.3C;BraA09g066170.3C;BraA06g031320.3C;BraA09g066180.3C	0.557741
GO:0005777	peroxisome	cellular_component	BraA09g046130.3C;BraA10g005190.3C;BraA02g006430.3C;BraA05g032950.3C;BraA04g004790.3C;BraA04g004770.3C;BraA05g018970.3C;BraA10g002820.3C;BraA03g030220.3C;BraA06g035090.3C;BraA08g019600.3C;BraA09g026060.3C;BraA04g030630.3C;BraA10g000310.3C;BraA08g001870.3C;BraA06g030050.3C;BraA09g012020.3C;BraA03g028080.3C;BraA02g023170.3C;BraA07g041510.3C;BraA03g022520.3C;BraA04g004780.3C;BraA08g033910.3C;BraA08g0…	0.571931
GO:0004356	glutamate-ammonia ligase activity	molecular_function	BraA10g023190.3C;BraA08g009150.3C;BraA01g034850.3C;BraA06g004530.3C;BraA05g020160.3C;BraA04g010460.3C;BraA10g021840.3C;BraA02g006550.3C;BraA05g029760.3C;BraA09g037120.3C;BraA09g044140.3C;BraA04g009580.3C	0.574523
GO:0005262	calcium channel activity	molecular_function	BraA03g060310.3C;BraA02g029850.3C;BraA09g009480.3C;BraA04g017480.3C;BraA03g059770.3C;BraA09g054100.3C;BraA06g006470.3C;BraA07g027920.3C;BraA09g011090.3C;BraA02g045670.3C;BraA01g026900.3C;BraA03g060300.3C	0.574523
GO:0005576	extracellular region	cellular_component	BraA10g011470.3C;BraA03g054640.3C;BraA04g004550.3C;BraA01g007430.3C;BraA04g000660.3C;BraA04g011460.3C;BraA02g043940.3C;BraA02g039910.3C;BraA09g030610.3C;BraA09g011680.3C;BraA07g043120.3C;BraA06g026560.3C;BraA01g037150.3C;BraA07g004150.3C;BraA08g028990.3C;BraA05g030260.3C;BraA04g000220.3C;BraA06g042330.3C;BraA07g004470.3C;BraA01g007620.3C;BraA10g001240.3C;BraA03g001860.3C;BraA03g046800.3C;BraA04g0…	0.595418
GO:0004197	cysteine-type endopeptidase activity	molecular_function	BraA10g018170.3C;BraA09g052900.3C;BraA10g005000.3C;BraA03g010770.3C;BraA09g005670.3C;BraA03g027300.3C;BraA03g012680.3C;BraA09g002400.3C;BraA07g015320.3C;BraA06g018610.3C;BraA06g043990.3C;BraA02g030380.3C;BraA05g022900.3C;BraA01g006400.3C;BraA08g022650.3C;BraA09g053550.3C;BraA08g027620.3C;BraA03g010760.3C;BraA04g025440.3C;BraA08g026940.3C;BraA02g032300.3C;BraA10g005010.3C;BraA02g028450.3C;BraA01g0…	0.596329
GO:0000062	fatty-acyl-CoA binding	molecular_function	BraA06g025750.3C;BraA10g005020.3C;BraA09g033390.3C;BraA01g018670.3C;BraA01g042640.3C;BraA06g042500.3C;BraA03g051730.3C;BraA02g040800.3C;BraA06g020990.3C;BraA05g039810.3C;BraA01g019720.3C;BraA06g028570.3C;BraA08g002910.3C;BraA05g023960.3C;BraA10g005060.3C;BraA03g053910.3C;BraA10g005030.3C;BraA05g038700.3C;BraA03g032110.3C;BraA03g059980.3C;BraA01g041800.3C;BraA09g043070.3C	0.600159
GO:0005575	cellular_component	cellular_component	BraA04g020950.3C;BraA08g004070.3C;BraA06g023240.3C;BraA10g016630.3C;BraA01g023980.3C;BraA09g037010.3C;BraA06g035860.3C;BraA10g009890.3C;BraA06g039330.3C;BraA07g006380.3C;BraA05g038470.3C;BraA07g013670.3C;BraA03g006520.3C;BraA02g000650.3C;BraA05g031680.3C;BraA06g024460.3C;BraA02g036710.3C;BraA03g007750.3C;BraA06g022900.3C;BraA02g041410.3C;BraA07g013460.3C;BraA01g036700.3C;BraA09g018980.3C;BraA06g0…	0.60022
GO:0000386	second spliceosomal transesterification activity	molecular_function	BraA02g003910.3C;BraA10g002470.3C;BraA01g030750.3C;BraA08g035150.3C	0.600478
GO:0022625	cytosolic large ribosomal subunit	cellular_component	BraA07g009700.3C;BraA04g007690.3C;BraA03g040790.3C;BraA01g030620.3C	0.600478
GO:0004758	serine C-palmitoyltransferase activity	molecular_function	BraA01g024090.3C;BraA03g060040.3C;BraA06g024750.3C;BraA06g024740.3C	0.600478
GO:0004311	farnesyltranstransferase activity	molecular_function	BraA01g028430.3C;BraA01g021190.3C;BraA04g012770.3C;BraA04g015180.3C	0.600478
GO:0005496	steroid binding	molecular_function	BraA10g010650.3C;BraA06g018140.3C;BraA04g018420.3C;BraA06g024810.3C	0.600478
GO:0000245	spliceosomal complex assembly	biological_process	BraA10g030610.3C;BraA03g049580.3C;BraA05g002990.3C;BraA09g005170.3C	0.600478
GO:0000727	double-strand break repair via break-induced replication	biological_process	BraA03g041450.3C;BraA07g008010.3C;BraA07g002580.3C;BraA03g035340.3C	0.600478
GO:0005471	ATP:ADP antiporter activity	molecular_function	BraA07g043110.3C;BraA10g028240.3C;BraA06g011560.3C;BraA08g029820.3C	0.600478
GO:0000055	ribosomal large subunit export from nucleus	biological_process	BraA09g060290.3C;BraA01g041290.3C;BraA10g028470.3C;BraA07g031880.3C	0.600478
GO:0003887	DNA-directed DNA polymerase activity	molecular_function	BraA03g052070.3C;BraA03g025200.3C;BraA01g015540.3C;BraA06g010630.3C	0.600478
GO:0003863	3-methyl-2-oxobutanoate dehydrogenase (2-methylpropanoyl-transferring) activity	molecular_function	BraA02g035700.3C;BraA08g000670.3C;BraA03g003830.3C;BraA08g027370.3C	0.600478
GO:0006779	porphyrin-containing compound biosynthetic process	biological_process	BraA09g007910.3C;BraA01g024770.3C;BraA06g008970.3C;BraA09g062130.3C	0.600478
GO:0004013	adenosylhomocysteinase activity	molecular_function	BraA07g009290.3C;BraA04g008150.3C;BraA08g006100.3C;BraA03g040880.3C	0.600478
GO:0009267	cellular response to starvation	biological_process	BraA06g005940.3C;BraA09g047710.3C;BraA02g024700.3C;BraA09g037870.3C	0.600478
GO:0004536	deoxyribonuclease activity	molecular_function	BraA04g007000.3C;BraA02g018590.3C;BraA01g043640.3C;BraA10g022450.3C	0.600478
GO:0004445	inositol-polyphosphate 5-phosphatase activity	molecular_function	BraA05g011940.3C;BraA10g004480.3C;BraA08g034280.3C;BraA09g064330.3C	0.600478
GO:0004512	inositol-3-phosphate synthase activity	molecular_function	BraA02g003370.3C;BraA01g000700.3C;BraA04g016220.3C;BraA10g027710.3C	0.600478
GO:0000054	ribosomal subunit export from nucleus	biological_process	BraA03g005830.3C;BraA10g013190.3C;BraA04g004430.3C;BraA02g013440.3C	0.600478
GO:0000060	protein import into nucleus, translocation	biological_process	BraA04g031640.3C;BraA03g023790.3C;BraA03g051930.3C;BraA05g005370.3C	0.600478
GO:0004467	long-chain fatty acid-CoA ligase activity	molecular_function	BraA10g026610.3C;BraA09g013870.3C;BraA05g000610.3C;BraA02g028550.3C;BraA05g000590.3C;BraA01g014520.3C;BraA09g027580.3C;BraA07g026960.3C;BraA05g019770.3C	0.600894
GO:0004312	fatty acid synthase activity	molecular_function	BraA06g041960.3C;BraA09g059570.3C;BraA09g021760.3C;BraA08g003630.3C;BraA02g032750.3C;BraA03g020440.3C;BraA07g038670.3C;BraA09g059560.3C;BraA03g041760.3C	0.600894
GO:0000741	karyogamy	biological_process	BraA09g033550.3C;BraA09g037310.3C;BraA01g006830.3C;BraA02g038270.3C;BraA09g006580.3C;BraA07g039580.3C;BraA07g000240.3C;BraA06g036870.3C;BraA06g015110.3C	0.600894
GO:0004650	polygalacturonase activity	molecular_function	BraA04g031410.3C;BraA03g033550.3C;BraA09g051030.3C;BraA03g037130.3C;BraA04g003230.3C;BraA07g020700.3C;BraA02g029790.3C;BraA03g029480.3C;BraA08g024280.3C;BraA03g023110.3C;BraA04g031430.3C;BraA05g037870.3C;BraA07g022910.3C;BraA09g048090.3C;BraA08g028340.3C;BraA04g012380.3C;BraA05g002520.3C;BraA02g039370.3C;BraA06g038200.3C;BraA03g049070.3C;BraA06g042790.3C;BraA10g001430.3C;BraA03g026540.3C;BraA07g0…	0.602168
GO:0005622	intracellular	cellular_component	BraA03g007730.3C;BraA03g017590.3C;BraA08g016190.3C;BraA06g004810.3C;BraA01g017610.3C;BraA03g057480.3C;BraA02g044220.3C;BraA08g016880.3C;BraA07g003130.3C;BraA08g006500.3C;BraA07g015200.3C;BraA02g016240.3C;BraA03g026330.3C;BraA06g031350.3C;BraA09g024890.3C;BraA09g037170.3C;BraA07g040480.3C;BraA06g016870.3C;BraA01g023100.3C;BraA08g024610.3C;BraA10g015970.3C;BraA10g022920.3C;BraA08g034030.3C;BraA03g0…	0.615816
GO:0004864	protein phosphatase inhibitor activity	molecular_function	BraA09g052870.3C;BraA10g028350.3C;BraA03g029760.3C;BraA02g014770.3C;BraA09g000060.3C;BraA04g027160.3C;BraA09g022320.3C;BraA01g018740.3C;BraA06g041650.3C;BraA04g028450.3C;BraA03g020010.3C;BraA05g007290.3C;BraA01g009450.3C;BraA06g042180.3C;BraA10g011520.3C;BraA02g001740.3C;BraA08g012630.3C;BraA01g010160.3C;BraA05g005770.3C	0.617515
GO:0005887	integral component of plasma membrane	cellular_component	BraA01g043490.3C;BraA03g045750.3C;BraA07g022600.3C;BraA01g043510.3C;BraA08g009030.3C;BraA09g043100.3C;BraA09g040030.3C;BraA03g035310.3C;BraA09g021250.3C;BraA03g037280.3C;BraA07g014340.3C;BraA01g034570.3C;BraA03g009170.3C;BraA02g014000.3C;BraA02g031850.3C;BraA05g039250.3C;BraA02g031860.3C;BraA02g014850.3C;BraA04g003680.3C;BraA04g007350.3C;BraA05g042060.3C;BraA03g035330.3C;BraA05g023870.3C;BraA05g0…	0.620226
GO:0003682	chromatin binding	molecular_function	BraA03g050120.3C;BraA01g030740.3C;BraA07g040440.3C;BraA10g026010.3C;BraA07g035220.3C;BraA03g052410.3C;BraA02g019370.3C;BraA10g020900.3C;BraA07g017970.3C;BraA03g041210.3C;BraA03g003430.3C;BraA07g027170.3C;BraA04g007640.3C;BraA02g004470.3C;BraA09g045500.3C;BraA04g019710.3C;BraA02g006050.3C;BraA06g024170.3C;BraA10g023960.3C;BraA02g004010.3C;BraA02g002840.3C;BraA07g018110.3C;BraA07g009860.3C;BraA03g0…	0.625935
GO:0005739	mitochondrion	cellular_component	BraA10g025280.3C;BraA06g035740.3C;BraA09g039670.3C;BraA06g019480.3C;BraA09g004640.3C;BraA10g026200.3C;BraA02g014160.3C;BraA08g009500.3C;BraA06g006340.3C;BraA03g018350.3C;BraA01g012930.3C;BraA09g014200.3C;BraA03g013750.3C;BraA02g005960.3C;BraA09g000210.3C;BraA01g019350.3C;BraA06g038980.3C;BraA04g000430.3C;BraA06g010880.3C;BraA01g005270.3C;BraA05g028100.3C;BraA02g003550.3C;BraA09g011440.3C;BraA07g0…	0.62695
GO:0000977	RNA polymerase II regulatory region sequence-specific DNA binding	molecular_function	BraA09g022560.3C;BraA04g002340.3C;BraA04g020250.3C;BraA09g042110.3C;BraA07g006880.3C;BraA05g017160.3C;BraA04g003580.3C;BraA09g028800.3C;BraA04g012040.3C;BraA07g002390.3C;BraA07g018150.3C;BraA08g020140.3C;BraA03g060350.3C;BraA01g005150.3C;BraA06g011360.3C;BraA06g041300.3C;BraA03g040920.3C;BraA03g039480.3C;BraA08g013420.3C;BraA06g018270.3C;BraA01g032900.3C;BraA07g018730.3C;BraA09g026530.3C;BraA04g0…	0.626966
GO:0000775	chromosome, centromeric region	cellular_component	BraA07g024090.3C;BraA04g016660.3C;BraA06g013460.3C;BraA06g013560.3C;BraA03g006020.3C;BraA05g011550.3C;BraA03g020430.3C;BraA02g001520.3C;BraA05g005240.3C;BraA03g001820.3C;BraA03g025220.3C;BraA04g023880.3C;BraA07g040300.3C;BraA06g013570.3C;BraA07g034150.3C;BraA06g011670.3C;BraA04g019510.3C;BraA03g001530.3C;BraA10g031420.3C;BraA06g013510.3C;BraA03g023240.3C;BraA07g033080.3C;BraA04g031570.3C;BraA06g0…	0.633946
GO:0004069	L-aspartate:2-oxoglutarate aminotransferase activity	molecular_function	BraA10g020790.3C;BraA02g003960.3C;BraA03g063280.3C;BraA09g055020.3C;BraA09g015550.3C;BraA01g005980.3C;BraA02g015680.3C;BraA05g013640.3C;BraA09g012690.3C;BraA03g004710.3C;BraA04g016260.3C	0.634943
GO:0005375	copper ion transmembrane transporter activity	molecular_function	BraA05g007670.3C;BraA02g010970.3C;BraA02g009040.3C;BraA02g011140.3C;BraA06g042780.3C;BraA09g020770.3C;BraA06g020010.3C;BraA10g017120.3C;BraA10g017140.3C;BraA10g019980.3C;BraA02g011150.3C	0.634943
GO:0000788	nuclear nucleosome	cellular_component	BraA06g020660.3C;BraA04g020550.3C;BraA07g019050.3C;BraA03g010460.3C;BraA10g017740.3C;BraA03g011050.3C	0.639991
GO:0004362	glutathione-disulfide reductase activity	molecular_function	BraA07g009030.3C;BraA08g018840.3C;BraA09g045490.3C;BraA03g054660.3C;BraA04g005290.3C;BraA01g008770.3C	0.639991
GO:0004478	methionine adenosyltransferase activity	molecular_function	BraA03g019180.3C;BraA03g029510.3C;BraA04g026170.3C;BraA05g000750.3C;BraA09g002300.3C;BraA05g008480.3C	0.639991
GO:0000981	RNA polymerase II transcription factor activity, sequence-specific DNA binding	molecular_function	BraA07g021670.3C;BraA03g000730.3C;BraA03g022050.3C;BraA07g042580.3C;BraA06g012080.3C;BraA10g033160.3C	0.639991
GO:0005975	carbohydrate metabolic process	biological_process	BraA06g027840.3C;BraA04g004360.3C;BraA03g015090.3C;BraA07g022160.3C;BraA01g022810.3C;BraA09g046560.3C	0.639991
GO:0000254	C-4 methylsterol oxidase activity	molecular_function	BraA02g028020.3C;BraA08g033630.3C;BraA01g013370.3C;BraA10g006090.3C;BraA03g051440.3C;BraA09g063340.3C	0.639991
GO:0000793	condensed chromosome	cellular_component	BraA03g019630.3C;BraA01g035770.3C;BraA05g012360.3C;BraA04g010480.3C;BraA04g023400.3C;BraA01g028280.3C	0.639991
GO:0001653	peptide receptor activity	molecular_function	BraA02g014340.3C;BraA07g036680.3C;BraA10g012130.3C;BraA09g059320.3C;BraA07g036690.3C;BraA02g035420.3C	0.639991
GO:0005452	inorganic anion exchanger activity	molecular_function	BraA05g000710.3C;BraA04g000750.3C;BraA05g000700.3C;BraA05g000720.3C;BraA03g032700.3C;BraA02g022500.3C	0.639991
GO:0004142	diacylglycerol cholinephosphotransferase activity	molecular_function	BraA02g013370.3C;BraA03g037170.3C;BraA06g009780.3C;BraA06g038900.3C;BraA05g031230.3C;BraA02g036500.3C	0.639991
GO:0004557	alpha-galactosidase activity	molecular_function	BraA02g002710.3C;BraA02g036920.3C;BraA05g022020.3C;BraA03g003500.3C;BraA03g003510.3C;BraA02g002700.3C	0.639991
GO:0004066	asparagine synthase (glutamine-hydrolyzing) activity	molecular_function	BraA10g021080.3C;BraA06g023920.3C;BraA06g019700.3C;BraA09g024070.3C;BraA06g028460.3C;BraA02g007980.3C	0.639991
GO:0004601	peroxidase activity	molecular_function	BraA10g003850.3C;BraA09g013170.3C;BraA07g017670.3C;BraA06g041400.3C;BraA02g009770.3C;BraA01g001350.3C;BraA09g030190.3C;BraA02g007250.3C;BraA09g027240.3C;BraA03g002070.3C;BraA03g020080.3C;BraA03g056260.3C;BraA02g044450.3C;BraA05g025370.3C;BraA02g039310.3C;BraA01g015810.3C;BraA09g059310.3C;BraA06g017920.3C;BraA05g011000.3C;BraA03g026770.3C;BraA06g010710.3C;BraA02g023920.3C;BraA09g064560.3C;BraA03g0…	0.641122
GO:0000149	SNARE binding	molecular_function	BraA07g002460.3C;BraA07g011570.3C;BraA02g019200.3C;BraA03g017240.3C;BraA01g009340.3C;BraA10g016080.3C;BraA10g026980.3C;BraA02g034500.3C;BraA05g042100.3C;BraA05g036870.3C;BraA02g002600.3C;BraA05g039620.3C;BraA01g005860.3C;BraA09g018040.3C;BraA02g011750.3C;BraA06g005710.3C;BraA01g030700.3C;BraA01g035220.3C;BraA01g040580.3C;BraA06g007930.3C;BraA03g037930.3C;BraA08g033100.3C;BraA06g041590.3C;BraA03g0…	0.651894
GO:0005829	cytosol	cellular_component	BraA03g001900.3C;BraA03g056280.3C;BraA06g031790.3C;BraA05g008670.3C;BraA06g031760.3C;BraA06g023440.3C;BraA07g019730.3C;BraA09g007000.3C;BraA10g011950.3C;BraA01g013410.3C;BraA09g002320.3C;BraA01g021100.3C;BraA09g058860.3C;BraA08g009120.3C;BraA06g027930.3C;BraA02g020610.3C;BraA10g028650.3C;BraA04g009610.3C;BraA07g027260.3C;BraA02g007940.3C;BraA04g009980.3C;BraA07g030970.3C;BraA01g035370.3C;BraA03g0…	0.65322
GO:0000815	ESCRT III complex	cellular_component	BraA06g042980.3C;BraA10g018630.3C;BraA01g011430.3C;BraA09g012090.3C;BraA08g035090.3C;BraA02g010090.3C;BraA08g014110.3C;BraA03g054930.3C;BraA01g008420.3C;BraA06g027320.3C;BraA09g020620.3C;BraA10g002520.3C;BraA03g010520.3C	0.663176
GO:0006508	proteolysis	biological_process	BraA01g023300.3C;BraA03g043200.3C;BraA03g050130.3C;BraA09g042580.3C;BraA01g004500.3C;BraA03g045540.3C;BraA07g020560.3C;BraA09g026090.3C;BraA01g021790.3C;BraA07g018130.3C;BraA01g038150.3C;BraA09g042570.3C;BraA03g050240.3C;BraA06g025040.3C;BraA09g041330.3C;BraA06g017730.3C;BraA08g024250.3C;BraA10g012260.3C	0.663433
GO:0005351	sugar:proton symporter activity	molecular_function	BraA07g002130.3C;BraA07g004640.3C;BraA07g026250.3C;BraA01g011070.3C;BraA09g061400.3C;BraA06g016300.3C;BraA09g012140.3C;BraA02g040680.3C;BraA02g023500.3C;BraA05g040020.3C;BraA07g040010.3C;BraA02g017160.3C;BraA07g004660.3C;BraA07g040650.3C;BraA01g042840.3C;BraA03g005880.3C;BraA03g028300.3C;BraA03g032430.3C;BraA03g058820.3C;BraA01g038410.3C;BraA06g019600.3C;BraA03g002390.3C;BraA03g039100.3C;BraA06g0…	0.665418
GO:0000398	mRNA splicing, via spliceosome	biological_process	BraA03g002380.3C;BraA03g056780.3C;BraA09g050910.3C;BraA07g040630.3C;BraA05g023160.3C;BraA05g027620.3C;BraA05g036920.3C;BraA01g027020.3C;BraA09g049650.3C;BraA04g030820.3C;BraA08g032430.3C;BraA02g023740.3C;BraA08g018170.3C;BraA03g049300.3C;BraA02g001930.3C;BraA04g027400.3C;BraA10g030870.3C;BraA07g031720.3C;BraA01g039720.3C;BraA09g062210.3C;BraA10g026950.3C;BraA10g001900.3C;BraA02g016800.3C;BraA01g0…	0.668291
GO:0006636	unsaturated fatty acid biosynthetic process	biological_process	BraA05g031200.3C;BraA03g037210.3C;BraA03g037200.3C;BraA05g031170.3C;BraA09g016490.3C;BraA08g019580.3C;BraA03g037220.3C;BraA05g031210.3C	0.670308
GO:0003841	1-acylglycerol-3-phosphate O-acyltransferase activity	molecular_function	BraA05g018430.3C;BraA03g055970.3C;BraA07g027970.3C;BraA03g051690.3C;BraA04g003170.3C;BraA07g022970.3C;BraA01g034060.3C;BraA09g048210.3C	0.670308
GO:0004351	glutamate decarboxylase activity	molecular_function	BraA06g022760.3C;BraA02g035300.3C;BraA02g006980.3C;BraA01g034890.3C;BraA05g029820.3C;BraA07g031850.3C;BraA10g022660.3C;BraA09g023350.3C	0.670308
GO:0000307	cyclin-dependent protein kinase holoenzyme complex	cellular_component	BraA01g010840.3C;BraA07g012040.3C;BraA08g024790.3C;BraA09g037340.3C;BraA02g039780.3C;BraA03g020270.3C;BraA08g013560.3C;BraA09g005110.3C	0.670308
GO:0000285	1-phosphatidylinositol-3-phosphate 5-kinase activity	molecular_function	BraA06g021440.3C;BraA06g021450.3C;BraA01g037390.3C;BraA10g004850.3C;BraA07g035680.3C;BraA03g036360.3C;BraA02g020170.3C;BraA01g004730.3C	0.670308
GO:0009507	chloroplast	cellular_component	BraA08g029770.3C;BraA02g008500.3C;BraA02g028230.3C;BraA01g003490.3C;BraA05g031350.3C;BraA06g010460.3C;BraA05g027550.3C;BraA01g022230.3C;BraA02g023540.3C;BraA09g049310.3C;BraA03g039900.3C;BraA10g024370.3C;BraA01g002840.3C;BraA05g035970.3C;BraA06g035960.3C;BraA05g028380.3C;BraA02g005710.3C;BraA03g038210.3C;BraA05g012230.3C;BraA05g025140.3C;BraA01g044170.3C;BraA03g026220.3C;BraA02g014230.3C;BraA01g0…	0.675353
GO:0008150	biological_process	biological_process	BraA08g022870.3C;BraA04g026460.3C;BraA02g007820.3C;BraA06g035080.3C;BraA02g009080.3C;BraA09g008700.3C;BraA01g029680.3C;BraA06g010670.3C;BraA04g004560.3C;BraA06g005230.3C;BraA10g021250.3C;BraA03g047350.3C;BraA03g047360.3C;BraA09g064320.3C;BraA08g033340.3C;BraA04g018970.3C;BraA03g015560.3C;BraA03g030330.3C;BraA08g021220.3C;BraA06g009000.3C;BraA03g047760.3C;BraA01g025630.3C;BraA04g013710.3C;BraA02g0…	0.682956
GO:0003712	transcription cofactor activity	molecular_function	BraA06g011820.3C;BraA03g001350.3C;BraA07g042040.3C;BraA06g029570.3C;BraA03g060860.3C;BraA01g001300.3C;BraA06g011850.3C;BraA09g058560.3C;BraA09g058150.3C;BraA01g038470.3C;BraA06g011830.3C;BraA07g009000.3C;BraA03g035660.3C;BraA08g034250.3C;BraA08g029590.3C;BraA06g018600.3C;BraA05g003060.3C;BraA06g011840.3C;BraA08g029600.3C;BraA06g011790.3C;BraA02g024960.3C;BraA06g012640.3C;BraA09g058550.3C;BraA08g0…	0.687027
GO:0005199	structural constituent of cell wall	molecular_function	BraA03g041170.3C;BraA01g004250.3C;BraA06g032830.3C;BraA01g033950.3C;BraA08g016310.3C;BraA03g022600.3C;BraA08g003750.3C;BraA03g038640.3C;BraA01g031440.3C;BraA05g024400.3C;BraA03g058490.3C;BraA05g003450.3C;BraA07g004970.3C;BraA04g030500.3C;BraA09g038640.3C	0.687328
GO:0000175	3'-5'-exoribonuclease activity	molecular_function	BraA02g024250.3C;BraA10g024540.3C;BraA01g018260.3C;BraA06g020470.3C;BraA09g017360.3C;BraA05g042050.3C;BraA10g033360.3C;BraA03g031380.3C;BraA09g051160.3C;BraA06g021620.3C;BraA09g010960.3C;BraA03g010220.3C;BraA09g050300.3C;BraA08g017540.3C;BraA01g041370.3C	0.687328
GO:0004004	ATP-dependent RNA helicase activity	molecular_function	BraA06g014660.3C;BraA02g037610.3C;BraA08g024660.3C;BraA02g025020.3C;BraA09g029900.3C;BraA08g028450.3C;BraA01g009950.3C;BraA07g027080.3C;BraA10g030430.3C;BraA03g027040.3C	0.695251
GO:0004620	phospholipase activity	molecular_function	BraA03g025810.3C;BraA03g060450.3C;BraA03g060440.3C;BraA09g016200.3C;BraA07g021950.3C;BraA05g031290.3C;BraA01g007900.3C;BraA03g037140.3C;BraA07g005520.3C;BraA01g036460.3C	0.695251
GO:0000045	autophagosome assembly	biological_process	BraA03g056180.3C;BraA04g022550.3C;BraA02g006950.3C;BraA07g025220.3C;BraA09g052060.3C;BraA08g017920.3C;BraA03g002010.3C;BraA05g013480.3C;BraA10g023330.3C;BraA03g007380.3C;BraA05g028170.3C;BraA03g055830.3C;BraA10g022680.3C;BraA09g009280.3C;BraA01g006990.3C;BraA09g051250.3C;BraA09g041720.3C	0.708432
GO:0000036	ACP phosphopantetheine attachment site binding involved in fatty acid biosynthetic process	molecular_function	BraA01g042810.3C;BraA08g033120.3C;BraA07g008000.3C;BraA02g034160.3C;BraA01g022460.3C;BraA01g015780.3C;BraA04g008920.3C;BraA03g041460.3C;BraA06g036630.3C;BraA09g062730.3C;BraA02g016600.3C;BraA03g031960.3C;BraA07g031580.3C;BraA09g062740.3C;BraA09g019020.3C;BraA05g040150.3C;BraA04g009880.3C	0.708432
GO:0000381	regulation of alternative mRNA splicing, via spliceosome	biological_process	BraA04g017070.3C;BraA07g021620.3C;BraA07g021630.3C	0.712152
GO:0000323	lytic vacuole	cellular_component	BraA03g012590.3C;BraA01g005100.3C;BraA02g012510.3C	0.712152
GO:0003844	1,4-alpha-glucan branching enzyme activity	molecular_function	BraA10g032560.3C;BraA04g025900.3C;BraA05g026800.3C	0.712152
GO:0005504	fatty acid binding	molecular_function	BraA04g019280.3C;BraA06g001290.3C;BraA09g052430.3C	0.712152
GO:0004818	glutamate-tRNA ligase activity	molecular_function	BraA01g017450.3C;BraA06g033370.3C;BraA02g041320.3C	0.712152
GO:0004476	mannose-6-phosphate isomerase activity	molecular_function	BraA02g017380.3C;BraA01g044070.3C;BraA09g041280.3C	0.712152
GO:0007275	multicellular organism development	biological_process	BraA08g006810.3C;BraA04g028490.3C;BraA01g017770.3C	0.712152
GO:0000453	enzyme-directed rRNA 2'-O-methylation	biological_process	BraA08g019970.3C;BraA10g006140.3C;BraA03g052730.3C	0.712152
GO:0004474	malate synthase activity	molecular_function	BraA02g001120.3C;BraA03g010830.3C;BraA02g028040.3C	0.712152
GO:0000271	polysaccharide biosynthetic process	biological_process	BraA02g006730.3C;BraA04g003460.3C;BraA10g022900.3C	0.712152
GO:0000234	phosphoethanolamine N-methyltransferase activity	molecular_function	BraA04g010470.3C;BraA07g028670.3C;BraA06g004430.3C	0.712152
GO:0004385	guanylate kinase activity	molecular_function	BraA04g003220.3C;BraA09g048130.3C;BraA07g022930.3C	0.712152
GO:0004832	valine-tRNA ligase activity	molecular_function	BraA07g002240.3C;BraA10g023070.3C;BraA07g011700.3C	0.712152
GO:0009793	embryo development ending in seed dormancy	biological_process	BraA08g006570.3C;BraA02g031180.3C;BraA09g020420.3C	0.712152
GO:0006855	drug transmembrane transport	biological_process	BraA03g052700.3C;BraA08g014790.3C;BraA08g019990.3C	0.712152
GO:0003983	UTP:glucose-1-phosphate uridylyltransferase activity	molecular_function	BraA09g053110.3C;BraA01g043720.3C;BraA05g041780.3C	0.712152
GO:0004128	cytochrome-b5 reductase activity, acting on NAD(P)H	molecular_function	BraA03g008130.3C;BraA02g007210.3C;BraA10g022310.3C	0.712152
GO:0000578	embryonic axis specification	biological_process	BraA07g017890.3C;BraA02g021430.3C;BraA07g037250.3C	0.712152
GO:0004018	N6-(1,2-dicarboxyethyl)AMP AMP-lyase (fumarate-forming) activity	molecular_function	BraA03g048270.3C;BraA08g012930.3C;BraA04g012260.3C	0.712152
GO:0005274	allantoin uptake transmembrane transporter activity	molecular_function	BraA09g038340.3C;BraA09g024060.3C;BraA02g036140.3C	0.712152
GO:0010227	floral organ abscission	biological_process	BraA07g018940.3C;BraA03g060550.3C;BraA02g010430.3C	0.712152
GO:0009107	lipoate biosynthetic process	biological_process	BraA06g030880.3C;BraA02g002740.3C;BraA03g003550.3C	0.712152
GO:0006487	protein N-linked glycosylation	biological_process	BraA02g000730.3C;BraA06g008350.3C;BraA10g032830.3C	0.712152
GO:0004365	glyceraldehyde-3-phosphate dehydrogenase (NAD+) (phosphorylating) activity	molecular_function	BraA06g012240.3C;BraA02g025340.3C;BraA08g007230.3C	0.712152
GO:0009648	photoperiodism	biological_process	BraA09g020500.3C;BraA01g023330.3C;BraA09g042660.3C	0.712152
GO:0004615	phosphomannomutase activity	molecular_function	BraA05g005470.3C;BraA02g007100.3C;BraA03g023960.3C	0.712152
GO:0006468	protein phosphorylation	biological_process	BraA05g026230.3C;BraA01g032740.3C;BraA01g039100.3C	0.712152
GO:0004801	sedoheptulose-7-phosphate:D-glyceraldehyde-3-phosphate glyceronetransferase activity	molecular_function	BraA03g005720.3C;BraA06g009430.3C;BraA10g025400.3C	0.712152
GO:0004375	glycine dehydrogenase (decarboxylating) activity	molecular_function	BraA03g018310.3C;BraA05g010040.3C;BraA01g004980.3C	0.712152
GO:0000914	phragmoplast assembly	biological_process	BraA01g042710.3C;BraA07g009420.3C;BraA01g030320.3C	0.712152
GO:0005052	peroxisome matrix targeting signal-1 binding	molecular_function	BraA02g012910.3C;BraA03g013040.3C;BraA10g014170.3C	0.712152
GO:0004349	glutamate 5-kinase activity	molecular_function	BraA09g046430.3C;BraA03g021080.3C;BraA04g004460.3C	0.712152
GO:0008540	proteasome regulatory particle, base subcomplex	cellular_component	BraA05g006370.3C;BraA05g031970.3C;BraA02g022780.3C	0.712152
GO:0005985	sucrose metabolic process	biological_process	BraA09g035680.3C;BraA09g044960.3C;BraA04g005700.3C	0.712152
GO:0001673	male germ cell nucleus	cellular_component	BraA04g005300.3C;BraA03g038760.3C;BraA09g045480.3C	0.712152
GO:0003977	UDP-N-acetylglucosamine diphosphorylase activity	molecular_function	BraA05g010090.3C;BraA08g010260.3C;BraA09g033870.3C	0.712152
GO:0000917	barrier septum assembly	biological_process	BraA10g016260.3C;BraA03g004670.3C;BraA10g026660.3C	0.712152
GO:0004001	adenosine kinase activity	molecular_function	BraA10g032700.3C;BraA03g000820.3C;BraA01g040550.3C	0.712152
GO:0000786	nucleosome	cellular_component	BraA07g021790.3C;BraA09g019360.3C;BraA05g008000.3C;BraA05g017570.3C;BraA02g034910.3C;BraA06g005900.3C;BraA02g010590.3C;BraA03g011200.3C;BraA09g008610.3C;BraA06g005090.3C;BraA10g027510.3C;BraA10g005430.3C;BraA01g017960.3C;BraA03g011080.3C;BraA02g039530.3C;BraA04g005340.3C;BraA05g020130.3C;BraA06g020670.3C;BraA09g009400.3C;BraA06g001850.3C;BraA02g040810.3C;BraA03g038250.3C;BraA04g020580.3C;BraA09g0…	0.712325
GO:0000165	MAPK cascade	biological_process	BraA03g052940.3C;BraA09g029190.3C;BraA03g039660.3C;BraA05g018200.3C;BraA06g005980.3C;BraA09g027220.3C;BraA05g039180.3C;BraA01g032420.3C;BraA04g012930.3C;BraA09g062650.3C;BraA07g002560.3C;BraA09g032810.3C	0.716568
GO:0004518	nuclease activity	molecular_function	BraA01g028740.3C;BraA02g030480.3C;BraA03g016170.3C;BraA09g009800.3C;BraA06g015210.3C	0.723955
GO:0005085	guanyl-nucleotide exchange factor activity	molecular_function	BraA01g003020.3C;BraA07g008350.3C;BraA06g023150.3C;BraA09g066370.3C;BraA04g001480.3C	0.723955
GO:0004618	phosphoglycerate kinase activity	molecular_function	BraA05g034280.3C;BraA02g025380.3C;BraA07g026180.3C;BraA03g035490.3C;BraA01g038640.3C	0.723955
GO:0030599	pectinesterase activity	molecular_function	BraA03g029150.3C;BraA09g000740.3C;BraA08g014950.3C;BraA05g039650.3C;BraA08g000360.3C	0.723955
GO:0009555	pollen development	biological_process	BraA06g006140.3C;BraA03g001840.3C;BraA05g001210.3C;BraA10g013920.3C;BraA02g013030.3C	0.723955
GO:0004309	exopolyphosphatase activity	molecular_function	BraA08g032790.3C	0.734659
GO:0001525	angiogenesis	biological_process	BraA07g040740.3C	0.734659
GO:0030136	clathrin-coated vesicle	cellular_component	BraA03g048040.3C	0.734659
GO:0000374	Group III intron splicing	biological_process	BraA09g035010.3C	0.734659
GO:0004198	calcium-dependent cysteine-type endopeptidase activity	molecular_function	BraA06g000590.3C	0.734659
GO:0006904	vesicle docking involved in exocytosis	biological_process	BraA03g055470.3C	0.734659
GO:0004558	alpha-1,4-glucosidase activity	molecular_function	BraA07g031290.3C	0.734659
GO:0004631	phosphomevalonate kinase activity	molecular_function	BraA08g009020.3C	0.734659
GO:0001129	RNA polymerase II transcription factor activity, TBP-class protein binding, involved in preinitiation complex assembly	molecular_function	BraA07g037930.3C	0.734659
GO:0008234	cysteine-type peptidase activity	molecular_function	BraA09g048430.3C	0.734659
GO:0004305	ethanolamine kinase activity	molecular_function	BraA07g017790.3C	0.734659
GO:0008284	positive regulation of cell proliferation	biological_process	BraA09g049790.3C	0.734659
GO:0030096	plasma membrane-derived thylakoid photosystem II	cellular_component	BraA01g008860.3C	0.734659
GO:0006520	cellular amino acid metabolic process	biological_process	BraA06g000280.3C	0.734659
GO:0009011	starch synthase activity	molecular_function	BraA06g029210.3C	0.734659
GO:0001735	prenylcysteine oxidase activity	molecular_function	BraA06g027360.3C	0.734659
GO:0004359	glutaminase activity	molecular_function	BraA10g018290.3C	0.734659
GO:0002039	p53 binding	molecular_function	BraA01g027190.3C	0.734659
GO:0019172	glyoxalase III activity	molecular_function	BraA05g041370.3C	0.734659
GO:0001649	osteoblast differentiation	biological_process	BraA06g020460.3C	0.734659
GO:0004482	mRNA (guanine-N7-)-methyltransferase activity	molecular_function	BraA09g043420.3C	0.734659
GO:0003842	1-pyrroline-5-carboxylate dehydrogenase activity	molecular_function	BraA06g026150.3C	0.734659
GO:0000372	Group I intron splicing	biological_process	BraA05g040670.3C	0.734659
GO:0008807	carboxyvinyl-carboxyphosphonate phosphorylmutase activity	molecular_function	BraA07g040530.3C	0.734659
GO:0000445	THO complex part of transcription export complex	cellular_component	BraA08g025260.3C	0.734659
GO:0003730	mRNA 3'-UTR binding	molecular_function	BraA09g047850.3C	0.734659
GO:0005253	anion channel activity	molecular_function	BraA01g034390.3C	0.734659
GO:0006694	steroid biosynthetic process	biological_process	BraA03g046530.3C	0.734659
GO:0004181	metallocarboxypeptidase activity	molecular_function	BraA02g020320.3C	0.734659
GO:0004835	tubulin-tyrosine ligase activity	molecular_function	BraA04g010280.3C	0.734659
GO:0005786	signal recognition particle, endoplasmic reticulum targeting	cellular_component	BraA05g003740.3C	0.734659
GO:0005929	cilium	cellular_component	BraA04g032500.3C	0.734659
GO:0009723	response to ethylene	biological_process	BraA03g037470.3C	0.734659
GO:0016197	endosomal transport	biological_process	BraA01g033370.3C	0.734659
GO:0005753	mitochondrial proton-transporting ATP synthase complex	cellular_component	BraA09g014610.3C	0.734659
GO:0008173	RNA methyltransferase activity	molecular_function	BraA06g037820.3C	0.734659
GO:0003896	DNA primase activity	molecular_function	BraA02g015110.3C	0.734659
GO:0005049	nuclear export signal receptor activity	molecular_function	BraA05g042590.3C	0.734659
GO:0006369	termination of RNA polymerase II transcription	biological_process	BraA09g054960.3C	0.734659
GO:0003858	3-hydroxybutyrate dehydrogenase activity	molecular_function	BraA07g008320.3C	0.734659
GO:0004157	dihydropyrimidinase activity	molecular_function	BraA10g026120.3C	0.734659
GO:0006914	autophagy	biological_process	BraA05g004100.3C	0.734659
GO:0006723	cuticle hydrocarbon biosynthetic process	biological_process	BraA06g037420.3C	0.734659
GO:0000481	maturation of 5S rRNA	biological_process	BraA07g009380.3C	0.734659
GO:0071567	UFM1 hydrolase activity	molecular_function	BraA06g018590.3C	0.734659
GO:0001570	vasculogenesis	biological_process	BraA10g027060.3C	0.734659
GO:0006474	N-terminal protein amino acid acetylation	biological_process	BraA03g031920.3C	0.734659
GO:0004000	adenosine deaminase activity	molecular_function	BraA09g025480.3C	0.734659
GO:0000188	inactivation of MAPK activity	biological_process	BraA04g004810.3C	0.734659
GO:0001729	ceramide kinase activity	molecular_function	BraA03g015520.3C	0.734659
GO:0003922	GMP synthase (glutamine-hydrolyzing) activity	molecular_function	BraA09g015120.3C	0.734659
GO:0000176	nuclear exosome (RNase complex)	cellular_component	BraA08g035390.3C	0.734659
GO:0005875	microtubule associated complex	cellular_component	BraA10g023050.3C	0.734659
GO:0000333	telomerase catalytic core complex	cellular_component	BraA10g022950.3C	0.734659
GO:0042803	protein homodimerization activity	molecular_function	BraA08g022880.3C	0.734659
GO:0004527	exonuclease activity	molecular_function	BraA03g006710.3C	0.734659
GO:0097602	cullin family protein binding	molecular_function	BraA06g000340.3C	0.734659
GO:0009523	photosystem II	cellular_component	BraA01g004080.3C	0.734659
GO:0047134	protein-disulfide reductase activity	molecular_function	BraA09g001410.3C	0.734659
GO:0003727	single-stranded RNA binding	molecular_function	BraA05g030350.3C	0.734659
GO:0001076	transcription factor activity, RNA polymerase II transcription factor binding	molecular_function	BraA03g041270.3C	0.734659
GO:0008219	cell death	biological_process	BraA01g025910.3C	0.734659
GO:0000918	barrier septum site selection	biological_process	BraA06g031420.3C	0.734659
GO:0008942	nitrite reductase [NAD(P)H] activity	molecular_function	BraA07g036050.3C	0.734659
GO:0005324	long-chain fatty acid transporter activity	molecular_function	BraA08g022120.3C	0.734659
GO:0004714	transmembrane receptor protein tyrosine kinase activity	molecular_function	BraA08g002170.3C	0.734659
GO:0016192	vesicle-mediated transport	biological_process	BraA03g004680.3C	0.734659
GO:0008408	3'-5' exonuclease activity	molecular_function	BraA09g018760.3C	0.734659
GO:0004058	aromatic-L-amino-acid decarboxylase activity	molecular_function	BraA01g008840.3C	0.734659
GO:0008097	5S rRNA binding	molecular_function	BraA09g059590.3C	0.734659
GO:0002752	cell surface pattern recognition receptor signaling pathway	biological_process	BraA05g025510.3C	0.734659
GO:0042300	beta-amyrin synthase activity	molecular_function	BraA07g042000.3C	0.734659
GO:0034975	protein folding in endoplasmic reticulum	biological_process	BraA01g013100.3C	0.734659
GO:0006729	tetrahydrobiopterin biosynthetic process	biological_process	BraA03g015620.3C	0.734659
GO:0004123	cystathionine gamma-lyase activity	molecular_function	BraA09g004810.3C	0.734659
GO:0008922	long-chain fatty acid [acyl-carrier-protein] ligase activity	molecular_function	BraA04g008050.3C	0.734659
GO:0016779	nucleotidyltransferase activity	molecular_function	BraA03g025640.3C	0.734659
GO:0008831	dTDP-4-dehydrorhamnose reductase activity	molecular_function	BraA02g026510.3C	0.734659
GO:0003998	acylphosphatase activity	molecular_function	BraA03g000790.3C	0.734659
GO:0009451	RNA modification	biological_process	BraA07g029640.3C	0.734659
GO:0080167	response to karrikin	biological_process	BraA09g001390.3C	0.734659
GO:0000169	activation of MAPK activity involved in osmosensory signaling pathway	biological_process	BraA06g020840.3C	0.734659
GO:0016301	kinase activity	molecular_function	BraA09g038940.3C	0.734659
GO:0000394	RNA splicing, via endonucleolytic cleavage and ligation	biological_process	BraA07g038110.3C	0.734659
GO:0003948	N4-(beta-N-acetylglucosaminyl)-L-asparaginase activity	molecular_function	BraA03g044550.3C	0.734659
GO:0003843	1,3-beta-D-glucan synthase activity	molecular_function	BraA05g013760.3C	0.734659
GO:0006287	base-excision repair, gap-filling	biological_process	BraA06g027430.3C	0.734659
GO:0004059	aralkylamine N-acetyltransferase activity	molecular_function	BraA05g023770.3C	0.734659
GO:0000182	rDNA binding	molecular_function	BraA03g060120.3C	0.734659
GO:0008195	phosphatidate phosphatase activity	molecular_function	BraA07g009840.3C	0.734659
GO:0004709	MAP kinase kinase kinase activity	molecular_function	BraA07g037700.3C	0.734659
GO:0000095	S-adenosyl-L-methionine transmembrane transporter activity	molecular_function	BraA08g022400.3C	0.734659
GO:0003856	3-dehydroquinate synthase activity	molecular_function	BraA06g036830.3C	0.734659
GO:0006744	ubiquinone biosynthetic process	biological_process	BraA06g012860.3C	0.734659
GO:0006405	RNA export from nucleus	biological_process	BraA06g044740.3C	0.734659
GO:0004164	diphthine synthase activity	molecular_function	BraA01g006140.3C	0.734659
GO:0000964	mitochondrial RNA 5'-end processing	biological_process	BraA02g044720.3C	0.734659
GO:0003975	UDP-N-acetylglucosamine-dolichyl-phosphate N-acetylglucosaminephosphotransferase activity	molecular_function	BraA05g002240.3C	0.734659
GO:0000706	meiotic DNA double-strand break processing	biological_process	BraA01g038310.3C	0.734659
GO:0000940	condensed chromosome outer kinetochore	cellular_component	BraA09g053430.3C	0.734659
GO:0009941	chloroplast envelope	cellular_component	BraA01g038820.3C	0.734659
GO:0000224	peptide-N4-(N-acetyl-beta-glucosaminyl)asparagine amidase activity	molecular_function	BraA06g034660.3C	0.734659
GO:0000025	maltose catabolic process	biological_process	BraA09g008470.3C	0.734659
GO:0005874	microtubule	cellular_component	BraA02g019040.3C	0.734659
GO:0006672	ceramide metabolic process	biological_process	BraA10g026370.3C	0.734659
GO:0009908	flower development	biological_process	BraA06g025420.3C	0.734659
GO:0000301	retrograde transport, vesicle recycling within Golgi	biological_process	BraA03g001190.3C	0.734659
GO:0003919	FMN adenylyltransferase activity	molecular_function	BraA03g003480.3C	0.734659
GO:0004112	cyclic-nucleotide phosphodiesterase activity	molecular_function	BraA08g013200.3C	0.734659
GO:0000491	small nucleolar ribonucleoprotein complex assembly	biological_process	BraA10g021710.3C	0.734659
GO:0004540	ribonuclease activity	molecular_function	BraA07g007500.3C	0.734659
GO:0005788	endoplasmic reticulum lumen	cellular_component	BraA05g037320.3C	0.734659
GO:0003848	2-amino-4-hydroxy-6-hydroxymethyldihydropteridine diphosphokinase activity	molecular_function	BraA01g007680.3C	0.734659
GO:0005983	starch catabolic process	biological_process	BraA03g030480.3C	0.734659
GO:0002100	tRNA wobble adenosine to inosine editing	biological_process	BraA02g018620.3C	0.734659
GO:0009517	PSII associated light-harvesting complex II	cellular_component	BraA02g017410.3C	0.734659
GO:0004561	alpha-N-acetylglucosaminidase activity	molecular_function	BraA02g005060.3C	0.734659
GO:0048193	Golgi vesicle transport	biological_process	BraA08g018160.3C	0.734659
GO:0004851	uroporphyrin-III C-methyltransferase activity	molecular_function	BraA04g013440.3C	0.734659
GO:0004008	copper-exporting ATPase activity	molecular_function	BraA09g054290.3C	0.734659
GO:0009809	lignin biosynthetic process	biological_process	BraA06g044540.3C	0.734659
GO:0000408	EKC/KEOPS complex	cellular_component	BraA05g004990.3C	0.734659
GO:0004848	ureidoglycolate hydrolase activity	molecular_function	BraA04g025430.3C	0.734659
GO:0004334	fumarylacetoacetase activity	molecular_function	BraA06g009540.3C	0.734659
GO:0004412	homoserine dehydrogenase activity	molecular_function	BraA10g019620.3C	0.734659
GO:0004563	beta-N-acetylhexosaminidase activity	molecular_function	BraA07g031690.3C	0.734659
GO:0009543	chloroplast thylakoid lumen	cellular_component	BraA06g021830.3C	0.734659
GO:0015098	molybdate ion transmembrane transporter activity	molecular_function	BraA09g054420.3C	0.734659
GO:0010200	response to chitin	biological_process	BraA01g016870.3C	0.734659
GO:0004746	riboflavin synthase activity	molecular_function	BraA07g000150.3C	0.734659
GO:0007035	vacuolar acidification	biological_process	BraA05g001260.3C	0.734659
GO:0006811	ion transport	biological_process	BraA09g045390.3C	0.734659
GO:0005261	cation channel activity	molecular_function	BraA05g000100.3C	0.734659
GO:0000480	endonucleolytic cleavage in 5'-ETS of tricistronic rRNA transcript (SSU-rRNA, 5.8S rRNA, LSU-rRNA)	biological_process	BraA03g056580.3C	0.734659
GO:0004121	cystathionine beta-lyase activity	molecular_function	BraA04g003510.3C	0.734659
GO:0004846	urate oxidase activity	molecular_function	BraA07g009600.3C	0.734659
GO:0042800	histone methyltransferase activity (H3-K4 specific)	molecular_function	BraA04g019640.3C	0.734659
GO:0006506	GPI anchor biosynthetic process	biological_process	BraA10g022720.3C	0.734659
GO:0000428	DNA-directed RNA polymerase complex	cellular_component	BraA06g023050.3C	0.734659
GO:0004026	alcohol O-acetyltransferase activity	molecular_function	BraA10g023040.3C	0.734659
GO:0051131	chaperone-mediated protein complex assembly	biological_process	BraA09g060860.3C	0.734659
GO:0001732	formation of cytoplasmic translation initiation complex	biological_process	BraA09g002790.3C	0.734659
GO:0006875	cellular metal ion homeostasis	biological_process	BraA06g012000.3C	0.734659
GO:0006888	ER to Golgi vesicle-mediated transport	biological_process	BraA09g019520.3C	0.734659
GO:0004161	dimethylallyltranstransferase activity	molecular_function	BraA01g037240.3C;BraA05g032530.3C;BraA06g040860.3C;BraA09g011510.3C;BraA01g037230.3C;BraA04g017500.3C;BraA03g036510.3C;BraA08g021280.3C;BraA07g002120.3C;BraA02g034250.3C;BraA05g027110.3C;BraA03g060290.3C;BraA03g039240.3C;BraA09g054090.3C	0.735224
GO:0004849	uridine kinase activity	molecular_function	BraA07g013000.3C;BraA09g033090.3C;BraA02g022000.3C;BraA02g034710.3C;BraA09g038260.3C;BraA08g008980.3C;BraA05g023780.3C	0.739021
GO:0005543	phospholipid binding	molecular_function	BraA07g007380.3C;BraA05g005280.3C;BraA08g021980.3C;BraA01g027320.3C;BraA09g050650.3C;BraA08g019570.3C;BraA04g001450.3C	0.739021
GO:0002181	cytoplasmic translation	biological_process	BraA09g032050.3C;BraA09g064600.3C;BraA10g003800.3C;BraA02g030640.3C;BraA09g011180.3C;BraA07g002690.3C;BraA06g029980.3C	0.739021
GO:0003989	acetyl-CoA carboxylase activity	molecular_function	BraA03g019880.3C;BraA06g007070.3C;BraA09g061970.3C;BraA10g023970.3C;BraA06g004850.3C;BraA08g007750.3C;BraA03g007460.3C	0.739021
GO:0004748	ribonucleoside-diphosphate reductase activity, thioredoxin disulfide as acceptor	molecular_function	BraA07g009520.3C;BraA10g029930.3C;BraA06g042290.3C;BraA03g051350.3C;BraA06g037880.3C;BraA07g015380.3C;BraA03g039830.3C	0.739021
GO:0008080	N-acetyltransferase activity	molecular_function	BraA03g054110.3C;BraA09g039290.3C;BraA04g017000.3C;BraA08g025680.3C;BraA07g029290.3C;BraA08g035480.3C;BraA07g006870.3C	0.739021
GO:0000244	spliceosomal tri-snRNP complex assembly	biological_process	BraA05g006920.3C;BraA01g011110.3C;BraA04g022410.3C;BraA08g016560.3C;BraA01g028100.3C;BraA05g006910.3C;BraA07g025630.3C	0.739021
GO:0000104	succinate dehydrogenase activity	molecular_function	BraA02g037690.3C;BraA06g029830.3C;BraA06g037640.3C;BraA09g003180.3C;BraA09g009390.3C;BraA02g045020.3C;BraA07g017190.3C	0.739021
GO:0003676	nucleic acid binding	molecular_function	BraA09g042550.3C;BraA10g032810.3C;BraA03g001960.3C;BraA09g042380.3C;BraA06g039590.3C;BraA09g066390.3C;BraA01g010970.3C;BraA08g015740.3C;BraA07g014350.3C;BraA07g010370.3C;BraA03g024660.3C;BraA03g003170.3C;BraA08g007880.3C;BraA10g012020.3C;BraA03g014930.3C;BraA04g019130.3C;BraA07g014910.3C;BraA10g010690.3C;BraA07g042790.3C;BraA10g014800.3C;BraA10g018680.3C;BraA09g047310.3C;BraA09g027980.3C;BraA07g0…	0.740495
GO:0016020	membrane	cellular_component	BraA07g004040.3C;BraA09g053390.3C;BraA09g031080.3C;BraA07g008650.3C;BraA10g028680.3C;BraA04g023820.3C;BraA04g006520.3C;BraA10g028190.3C;BraA01g041440.3C;BraA03g041160.3C;BraA07g003070.3C;BraA08g007300.3C;BraA06g030100.3C;BraA03g043450.3C;BraA05g031690.3C;BraA04g006530.3C	0.751816
GO:0002237	response to molecule of bacterial origin	biological_process	BraA03g031200.3C;BraA02g025510.3C;BraA08g013050.3C;BraA10g021610.3C;BraA08g013240.3C;BraA03g031950.3C;BraA09g042200.3C;BraA01g022670.3C;BraA08g017290.3C;BraA02g025910.3C;BraA03g056960.3C;BraA07g026010.3C;BraA05g040160.3C;BraA03g047050.3C;BraA07g043000.3C;BraA03g041440.3C	0.751816
GO:0000287	magnesium ion binding	molecular_function	BraA01g037250.3C;BraA08g018210.3C;BraA04g031060.3C;BraA05g033130.3C;BraA08g001020.3C;BraA03g062560.3C;BraA08g026610.3C;BraA08g015360.3C;BraA10g022610.3C;BraA03g036520.3C;BraA06g014310.3C;BraA04g016010.3C;BraA01g023870.3C;BraA02g038750.3C;BraA06g008560.3C;BraA05g018300.3C;BraA02g007760.3C;BraA10g012100.3C;BraA03g028920.3C;BraA02g021160.3C;BraA03g055520.3C;BraA03g018710.3C;BraA01g003140.3C;BraA03g0…	0.753332
GO:0004605	phosphatidate cytidylyltransferase activity	molecular_function	BraA03g023590.3C;BraA10g016440.3C;BraA10g031820.3C;BraA01g017520.3C;BraA03g063550.3C;BraA09g015880.3C;BraA03g063560.3C;BraA01g013030.3C;BraA03g011760.3C	0.753885
GO:0004725	protein tyrosine phosphatase activity	molecular_function	BraA05g039240.3C;BraA04g011650.3C;BraA05g027880.3C;BraA06g021320.3C;BraA03g001120.3C;BraA03g041770.3C;BraA09g059480.3C;BraA07g019820.3C;BraA07g007390.3C	0.753885
GO:0000209	protein polyubiquitination	biological_process	BraA08g002950.3C;BraA07g030480.3C;BraA10g003720.3C;BraA06g013080.3C;BraA06g020250.3C;BraA09g048950.3C;BraA08g019040.3C;BraA05g020820.3C;BraA09g019580.3C;BraA06g039660.3C;BraA02g000580.3C;BraA10g007240.3C;BraA10g017370.3C;BraA05g029750.3C;BraA10g014230.3C;BraA03g015790.3C;BraA05g027210.3C;BraA06g011160.3C;BraA08g030250.3C;BraA07g023560.3C;BraA09g023230.3C;BraA05g019010.3C;BraA07g034090.3C;BraA07g0…	0.75389
GO:0000028	ribosomal small subunit assembly	biological_process	BraA03g001720.3C;BraA05g008210.3C;BraA01g030190.3C;BraA08g029830.3C;BraA01g039280.3C;BraA09g004050.3C;BraA02g039330.3C;BraA03g044110.3C;BraA06g032890.3C;BraA10g031650.3C;BraA07g009280.3C;BraA02g020970.3C;BraA04g026370.3C;BraA10g012590.3C;BraA09g050670.3C;BraA03g040890.3C;BraA09g064980.3C;BraA06g011520.3C;BraA04g017900.3C;BraA03g035040.3C;BraA04g014040.3C;BraA02g001480.3C;BraA10g002800.3C	0.759164
GO:0003677	DNA binding	molecular_function	BraA05g038850.3C;BraA04g010190.3C;BraA05g042650.3C;BraA07g028240.3C;BraA06g028200.3C;BraA10g016250.3C;BraA03g015280.3C;BraA09g043960.3C;BraA08g025570.3C;BraA09g024740.3C;BraA09g062360.3C;BraA06g030710.3C;BraA05g018580.3C;BraA05g004720.3C;BraA02g040370.3C;BraA02g002860.3C;BraA01g043200.3C;BraA06g038100.3C;BraA08g021790.3C;BraA07g030690.3C;BraA10g028090.3C;BraA03g047750.3C;BraA07g016830.3C;BraA07g0…	0.767571
GO:0004656	procollagen-proline 4-dioxygenase activity	molecular_function	BraA04g030570.3C;BraA10g021330.3C;BraA01g016330.3C;BraA06g036990.3C;BraA08g016330.3C;BraA08g027890.3C;BraA01g002740.3C;BraA08g020560.3C;BraA01g002730.3C;BraA01g002720.3C;BraA09g003460.3C	0.767866
GO:0005385	zinc ion transmembrane transporter activity	molecular_function	BraA09g051440.3C;BraA05g014730.3C;BraA05g034330.3C;BraA08g000240.3C;BraA08g010130.3C;BraA03g055460.3C;BraA04g032310.3C;BraA03g055500.3C;BraA01g007590.3C;BraA05g014190.3C;BraA01g007580.3C;BraA01g007120.3C;BraA03g024260.3C;BraA05g026210.3C;BraA09g033750.3C;BraA07g030930.3C;BraA10g004050.3C;BraA01g007080.3C;BraA07g001700.3C;BraA10g004060.3C;BraA06g029630.3C;BraA02g043480.3C;BraA08g003920.3C;BraA08g0…	0.804087
GO:0004871	signal transducer activity	molecular_function	BraA03g017550.3C;BraA05g041940.3C;BraA10g022440.3C;BraA10g020000.3C;BraA10g001640.3C;BraA03g039050.3C;BraA04g025570.3C;BraA07g016450.3C;BraA07g011780.3C;BraA06g038310.3C;BraA06g027780.3C;BraA09g008220.3C;BraA02g005000.3C;BraA09g013970.3C;BraA09g042650.3C;BraA03g060840.3C;BraA09g034600.3C;BraA04g008090.3C;BraA05g031650.3C;BraA03g027740.3C;BraA09g041190.3C;BraA08g024410.3C;BraA05g031490.3C;BraA06g0…	0.804391
GO:0000014	single-stranded DNA endodeoxyribonuclease activity	molecular_function	BraA08g014360.3C;BraA08g014350.3C;BraA09g061420.3C;BraA04g013750.3C;BraA03g017010.3C;BraA04g007190.3C	0.80449
GO:0004462	lactoylglutathione lyase activity	molecular_function	BraA06g005360.3C;BraA07g032620.3C;BraA06g011430.3C;BraA09g058750.3C;BraA07g018790.3C;BraA08g029880.3C	0.80449
GO:0008375	acetylglucosaminyltransferase activity	molecular_function	BraA07g033530.3C;BraA02g018290.3C;BraA09g043240.3C;BraA07g033520.3C;BraA04g007250.3C;BraA03g057230.3C	0.80449
GO:0004402	histone acetyltransferase activity	molecular_function	BraA10g022990.3C;BraA05g041580.3C;BraA02g036370.3C;BraA02g042840.3C;BraA07g026970.3C;BraA03g007670.3C	0.80449
GO:0004045	aminoacyl-tRNA hydrolase activity	molecular_function	BraA07g019490.3C;BraA01g005140.3C;BraA10g027250.3C;BraA01g023920.3C;BraA03g004400.3C;BraA03g007720.3C	0.80449
GO:0003689	DNA clamp loader activity	molecular_function	BraA06g039740.3C;BraA02g035630.3C;BraA02g024100.3C;BraA07g027000.3C;BraA02g040850.3C;BraA09g012960.3C	0.80449
GO:0000419	DNA-directed RNA polymerase V complex	cellular_component	BraA03g043080.3C;BraA06g017840.3C;BraA06g025000.3C;BraA03g040510.3C;BraA09g047760.3C;BraA06g031570.3C	0.80449
GO:0001887	selenium compound metabolic process	biological_process	BraA02g016390.3C;BraA10g024070.3C;BraA03g030640.3C;BraA06g005650.3C	0.805588
GO:0005275	amine transmembrane transporter activity	molecular_function	BraA08g005250.3C;BraA04g028520.3C;BraA07g019710.3C;BraA02g017780.3C	0.805588
GO:0004348	glucosylceramidase activity	molecular_function	BraA09g031520.3C;BraA01g030470.3C;BraA02g029010.3C;BraA03g064640.3C	0.805588
GO:0003951	NAD+ kinase activity	molecular_function	BraA03g039580.3C;BraA07g041690.3C;BraA01g032560.3C;BraA02g024790.3C	0.805588
GO:0003871	5-methyltetrahydropteroyltriglutamate-homocysteine S-methyltransferase activity	molecular_function	BraA10g022160.3C;BraA03g008230.3C;BraA02g007310.3C;BraA10g019650.3C	0.805588
GO:0004392	heme oxygenase (decyclizing) activity	molecular_function	BraA01g017490.3C;BraA09g035910.3C;BraA09g018060.3C;BraA10g013230.3C	0.805588
GO:0005802	trans-Golgi network	cellular_component	BraA02g018640.3C;BraA07g033810.3C;BraA07g030580.3C;BraA05g007650.3C	0.805588
GO:0044255	cellular lipid metabolic process	biological_process	BraA09g017980.3C;BraA06g006880.3C;BraA09g062090.3C;BraA08g032310.3C	0.805588
GO:0003942	N-acetyl-gamma-glutamyl-phosphate reductase activity	molecular_function	BraA09g015260.3C;BraA10g015220.3C;BraA09g034090.3C;BraA09g028370.3C	0.805588
GO:0009416	response to light stimulus	biological_process	BraA03g022210.3C;BraA05g002660.3C;BraA03g024150.3C;BraA04g032040.3C	0.805588
GO:0004766	spermidine synthase activity	molecular_function	BraA02g014800.3C;BraA08g026350.3C;BraA10g011480.3C;BraA07g013950.3C	0.805588
GO:0004817	cysteine-tRNA ligase activity	molecular_function	BraA07g019720.3C;BraA05g016680.3C;BraA10g001840.3C;BraA04g011300.3C	0.805588
GO:0000774	adenyl-nucleotide exchange factor activity	molecular_function	BraA03g053330.3C;BraA10g022340.3C;BraA08g007650.3C;BraA01g017530.3C	0.805588
GO:0000152	nuclear ubiquitin ligase complex	cellular_component	BraA05g040920.3C;BraA05g011840.3C;BraA03g030660.3C;BraA01g044590.3C	0.805588
GO:0016592	mediator complex	cellular_component	BraA02g027530.3C;BraA07g020940.3C;BraA04g006120.3C;BraA05g016250.3C	0.805588
GO:0005742	mitochondrial outer membrane translocase complex	cellular_component	BraA04g014160.3C;BraA04g014170.3C;BraA04g014150.3C;BraA09g014580.3C	0.805588
GO:0005242	inward rectifier potassium channel activity	molecular_function	BraA03g031180.3C;BraA09g021740.3C;BraA09g052990.3C;BraA01g005580.3C;BraA05g041490.3C;BraA08g012880.3C;BraA01g005430.3C;BraA01g012890.3C	0.809136
GO:0000266	mitochondrial fission	biological_process	BraA02g009720.3C;BraA09g043330.3C;BraA04g018950.3C;BraA10g019000.3C;BraA08g016490.3C;BraA03g058020.3C;BraA10g025970.3C;BraA02g004480.3C	0.809136
GO:0000783	nuclear telomere cap complex	cellular_component	BraA05g034490.3C;BraA02g021150.3C;BraA09g063640.3C;BraA03g019270.3C;BraA06g013230.3C;BraA10g006160.3C;BraA09g004130.3C;BraA08g033550.3C	0.809136
GO:0004033	aldo-keto reductase (NADP) activity	molecular_function	BraA07g018280.3C;BraA10g011910.3C;BraA05g007770.3C;BraA08g033840.3C;BraA09g017020.3C;BraA05g007790.3C;BraA05g007780.3C;BraA03g019710.3C	0.809136
GO:0000105	histidine biosynthetic process	biological_process	BraA06g027330.3C;BraA09g018200.3C;BraA03g018920.3C;BraA09g008020.3C;BraA01g017670.3C;BraA01g031640.3C;BraA02g020580.3C;BraA06g006670.3C;BraA05g023920.3C;BraA07g036370.3C	0.815869
GO:0000079	regulation of cyclin-dependent protein serine/threonine kinase activity	biological_process	BraA05g004870.3C;BraA03g023450.3C;BraA09g050340.3C;BraA03g023540.3C;BraA03g044680.3C;BraA03g044700.3C;BraA01g042720.3C;BraA05g025300.3C;BraA05g039890.3C;BraA07g032350.3C	0.815869
GO:0005618	cell wall	cellular_component	BraA10g021340.3C;BraA03g013270.3C;BraA09g024010.3C;BraA02g031290.3C;BraA06g017860.3C;BraA03g062180.3C;BraA02g038580.3C;BraA02g014640.3C;BraA01g023800.3C;BraA01g042480.3C;BraA09g020560.3C;BraA03g017390.3C;BraA08g011580.3C;BraA03g036380.3C;BraA10g002440.3C;BraA05g039950.3C;BraA02g040190.3C;BraA01g037360.3C;BraA06g043090.3C;BraA01g037350.3C;BraA07g016650.3C;BraA06g031840.3C;BraA10g011700.3C;BraA04g0…	0.817649
GO:0004867	serine-type endopeptidase inhibitor activity	molecular_function	BraA04g025170.3C;BraA03g020510.3C;BraA04g000890.3C;BraA03g018460.3C;BraA03g022820.3C;BraA05g003670.3C;BraA06g042630.3C;BraA06g043680.3C;BraA09g002430.3C;BraA09g014780.3C;BraA10g025750.3C;BraA09g036200.3C;BraA05g009660.3C;BraA02g020690.3C;BraA02g031730.3C;BraA05g003650.3C;BraA01g028050.3C;BraA03g015260.3C;BraA04g030270.3C;BraA04g030280.3C;BraA09g014770.3C	0.824071
GO:0004439	phosphatidylinositol-4,5-bisphosphate 5-phosphatase activity	molecular_function	BraA05g032870.3C;BraA08g034340.3C;BraA10g019830.3C;BraA07g029460.3C;BraA02g044350.3C;BraA06g013140.3C;BraA09g049610.3C;BraA07g031680.3C;BraA07g014560.3C;BraA03g009840.3C;BraA06g013000.3C;BraA09g057780.3C;BraA09g040440.3C;BraA02g035230.3C;BraA10g006500.3C;BraA05g022260.3C;BraA08g026770.3C;BraA01g022390.3C;BraA02g020310.3C;BraA02g009150.3C;BraA10g004300.3C;BraA04g023100.3C;BraA05g009530.3C;BraA05g0…	0.824361
GO:0001046	core promoter sequence-specific DNA binding	molecular_function	BraA03g022590.3C;BraA01g012080.3C;BraA08g016360.3C;BraA04g030510.3C;BraA08g007990.3C;BraA08g022420.3C;BraA09g033880.3C;BraA10g022270.3C;BraA10g004590.3C;BraA02g011900.3C;BraA05g022000.3C;BraA03g008160.3C;BraA01g029400.3C;BraA02g017080.3C;BraA04g029740.3C;BraA01g006790.3C;BraA02g027170.3C;BraA07g011960.3C;BraA04g017810.3C;BraA06g002790.3C;BraA09g030460.3C;BraA06g044350.3C;BraA03g058380.3C;BraA09g0…	0.824361
GO:0003934	GTP cyclohydrolase I activity	molecular_function	BraA01g041590.3C;BraA02g039750.3C	0.826153
GO:0000280	nuclear division	biological_process	BraA01g022660.3C;BraA03g045360.3C	0.826153
GO:0004340	glucokinase activity	molecular_function	BraA07g000960.3C;BraA09g012100.3C	0.826153
GO:0000823	inositol-1,4,5-trisphosphate 6-kinase activity	molecular_function	BraA06g037270.3C;BraA10g029850.3C	0.826153
GO:0004061	arylformamidase activity	molecular_function	BraA03g058660.3C;BraA09g018880.3C	0.826153
GO:0003838	sterol 24-C-methyltransferase activity	molecular_function	BraA07g039560.3C;BraA03g005870.3C	0.826153
GO:0005654	nucleoplasm	cellular_component	BraA07g002550.3C;BraA09g053650.3C	0.826153
GO:0008839	4-hydroxy-tetrahydrodipicolinate reductase	molecular_function	BraA03g015130.3C;BraA03g023180.3C	0.826153
GO:0005353	fructose transmembrane transporter activity	molecular_function	BraA01g035840.3C;BraA03g046580.3C	0.826153
GO:0003984	acetolactate synthase activity	molecular_function	BraA04g022900.3C;BraA02g006420.3C	0.826153
GO:0004633	phosphopantothenoylcysteine decarboxylase activity	molecular_function	BraA03g038240.3C;BraA05g029500.3C	0.826153
GO:0004075	biotin carboxylase activity	molecular_function	BraA03g058570.3C;BraA08g016260.3C	0.826153
GO:0000469	cleavage involved in rRNA processing	biological_process	BraA09g060670.3C;BraA04g013840.3C	0.826153
GO:0005080	protein kinase C binding	molecular_function	BraA07g022440.3C;BraA04g003980.3C	0.826153
GO:0009570	chloroplast stroma	cellular_component	BraA10g020580.3C;BraA02g008470.3C	0.826153
GO:0000777	condensed chromosome kinetochore	cellular_component	BraA09g056080.3C;BraA03g017540.3C	0.826153
GO:0006662	glycerol ether metabolic process	biological_process	BraA10g029140.3C;BraA06g001630.3C	0.826153
GO:0005811	lipid particle	cellular_component	BraA07g029860.3C;BraA02g019970.3C	0.826153
GO:0004708	MAP kinase kinase activity	molecular_function	BraA10g000060.3C;BraA07g014970.3C	0.826153
GO:0009058	biosynthetic process	biological_process	BraA06g040680.3C;BraA09g015650.3C	0.826153
GO:0002221	pattern recognition receptor signaling pathway	biological_process	BraA03g005610.3C;BraA02g004680.3C	0.826153
GO:0004165	dodecenoyl-CoA delta-isomerase activity	molecular_function	BraA05g038680.3C;BraA01g041760.3C	0.826153
GO:0004353	glutamate dehydrogenase [NAD(P)+] activity	molecular_function	BraA01g043400.3C;BraA10g021930.3C	0.826153
GO:0000963	mitochondrial RNA processing	biological_process	BraA01g007030.3C;BraA01g007130.3C	0.826153
GO:0006355	regulation of transcription, DNA-templated	biological_process	BraA03g016960.3C;BraA05g011950.3C	0.826153
GO:0004566	beta-glucuronidase activity	molecular_function	BraA08g009440.3C;BraA03g044250.3C	0.826153
GO:0001682	tRNA 5'-leader removal	biological_process	BraA01g012630.3C;BraA07g004460.3C	0.826153
GO:0006814	sodium ion transport	biological_process	BraA02g044530.3C;BraA05g027820.3C	0.826153
GO:0005680	anaphase-promoting complex	cellular_component	BraA02g041080.3C;BraA06g040820.3C	0.826153
GO:0000248	C-5 sterol desaturase activity	molecular_function	BraA01g044080.3C;BraA03g031030.3C	0.826153
GO:0016798	hydrolase activity, acting on glycosyl bonds	molecular_function	BraA06g013960.3C;BraA10g023710.3C	0.826153
GO:0004413	homoserine kinase activity	molecular_function	BraA09g010830.3C;BraA06g030590.3C	0.826153
GO:0000030	mannosyltransferase activity	molecular_function	BraA09g058200.3C;BraA06g012540.3C	0.826153
GO:0005483	soluble NSF attachment protein activity	molecular_function	BraA04g004190.3C;BraA07g022260.3C	0.826153
GO:0000778	condensed nuclear chromosome kinetochore	cellular_component	BraA07g005070.3C;BraA02g037270.3C	0.826153
GO:0006955	immune response	biological_process	BraA08g023780.3C;BraA07g011030.3C	0.826153
GO:0008514	organic anion transmembrane transporter activity	molecular_function	BraA10g032160.3C;BraA01g040430.3C	0.826153
GO:0004420	hydroxymethylglutaryl-CoA reductase (NADPH) activity	molecular_function	BraA07g040140.3C;BraA07g003640.3C	0.826153
GO:0000795	synaptonemal complex	cellular_component	BraA03g059490.3C;BraA07g041320.3C	0.826153
GO:0000023	maltose metabolic process	biological_process	BraA02g007090.3C;BraA05g001900.3C	0.826153
GO:0005227	calcium activated cation channel activity	molecular_function	BraA08g014880.3C;BraA01g012760.3C	0.826153
GO:0004322	ferroxidase activity	molecular_function	BraA09g001140.3C;BraA03g028650.3C	0.826153
GO:0008474	palmitoyl-(protein) hydrolase activity	molecular_function	BraA06g041190.3C;BraA02g033800.3C	0.826153
GO:0004451	isocitrate lyase activity	molecular_function	BraA05g025430.3C;BraA03g039990.3C	0.826153
GO:0005102	receptor binding	molecular_function	BraA07g033820.3C;BraA04g019630.3C	0.826153
GO:0006865	amino acid transport	biological_process	BraA03g033900.3C;BraA03g035000.3C	0.826153
GO:0000780	condensed nuclear chromosome, centromeric region	cellular_component	BraA08g016850.3C;BraA02g007120.3C	0.826153
GO:0004109	coproporphyrinogen oxidase activity	molecular_function	BraA09g007770.3C;BraA10g002030.3C	0.826153
GO:0005310	dicarboxylic acid transmembrane transporter activity	molecular_function	BraA03g009220.3C;BraA10g020640.3C	0.826153
GO:0000212	meiotic spindle organization	biological_process	BraA10g015940.3C;BraA02g011980.3C	0.826153
GO:0004514	nicotinate-nucleotide diphosphorylase (carboxylating) activity	molecular_function	BraA09g054250.3C;BraA03g060540.3C	0.826153
GO:0000076	DNA replication checkpoint	biological_process	BraA05g039770.3C;BraA08g035520.3C	0.826153
GO:0003881	CDP-diacylglycerol-inositol 3-phosphatidyltransferase activity	molecular_function	BraA08g022970.3C;BraA07g030980.3C	0.826153
GO:0016614	oxidoreductase activity, acting on CH-OH group of donors	molecular_function	BraA09g046800.3C;BraA03g015240.3C	0.826153
GO:0006679	glucosylceramide biosynthetic process	biological_process	BraA07g000940.3C;BraA09g056390.3C	0.826153
GO:0003923	GPI-anchor transamidase activity	molecular_function	BraA10g021090.3C;BraA09g062640.3C	0.826153
GO:0008493	tetracycline transporter activity	molecular_function	BraA07g004100.3C;BraA07g004120.3C	0.826153
GO:0003678	DNA helicase activity	molecular_function	BraA03g052270.3C;BraA06g029430.3C	0.826153
GO:0000418	DNA-directed RNA polymerase IV complex	cellular_component	BraA05g016750.3C;BraA08g011780.3C;BraA03g040340.3C;BraA03g021210.3C;BraA03g065490.3C;BraA06g008120.3C;BraA06g001200.3C;BraA09g003420.3C;BraA01g020540.3C;BraA05g029430.3C;BraA07g005420.3C;BraA08g031610.3C;BraA09g049480.3C;BraA03g062260.3C	0.831014
GO:0004812	aminoacyl-tRNA ligase activity	molecular_function	BraA04g004650.3C;BraA10g007170.3C;BraA09g051640.3C;BraA04g019030.3C;BraA08g013320.3C;BraA07g002060.3C;BraA05g017710.3C;BraA01g038430.3C;BraA07g025000.3C;BraA07g023390.3C;BraA04g011770.3C;BraA03g031750.3C;BraA09g046220.3C;BraA01g042880.3C	0.831014
GO:0005840	ribosome	cellular_component	BraA09g008360.3C;BraA07g030640.3C;BraA10g013130.3C;BraA02g013510.3C;BraA02g014310.3C;BraA04g005560.3C;BraA06g041890.3C	0.859269
GO:0004739	pyruvate dehydrogenase (acetyl-transferring) activity	molecular_function	BraA07g013530.3C;BraA07g034950.3C;BraA01g027850.3C;BraA03g015810.3C;BraA09g065970.3C;BraA10g009220.3C;BraA02g016100.3C	0.859269
GO:0000338	protein deneddylation	biological_process	BraA07g024480.3C;BraA03g053120.3C;BraA01g020700.3C;BraA01g020690.3C;BraA07g014420.3C;BraA09g050700.3C;BraA09g040180.3C	0.859269
GO:0004332	fructose-bisphosphate aldolase activity	molecular_function	BraA02g034390.3C;BraA04g025970.3C;BraA01g017270.3C;BraA04g025980.3C;BraA04g025990.3C;BraA08g022720.3C;BraA01g000200.3C;BraA09g055600.3C;BraA04g015630.3C	0.859426
GO:0000421	autophagosome membrane	cellular_component	BraA09g025640.3C;BraA03g023610.3C;BraA05g039000.3C;BraA03g046990.3C;BraA03g049890.3C;BraA08g022700.3C;BraA03g032690.3C;BraA07g023170.3C;BraA02g027610.3C	0.859426
GO:0000082	G1/S transition of mitotic cell cycle	biological_process	BraA03g035220.3C;BraA08g016120.3C;BraA09g063530.3C;BraA09g054240.3C;BraA10g005740.3C;BraA04g014530.3C;BraA01g039060.3C;BraA07g020710.3C;BraA10g032640.3C	0.859426
GO:0005200	structural constituent of cytoskeleton	molecular_function	BraA03g019620.3C;BraA04g026680.3C;BraA10g020620.3C;BraA02g027850.3C;BraA02g012980.3C;BraA08g003230.3C;BraA10g027990.3C;BraA04g029640.3C;BraA02g003190.3C;BraA03g011370.3C;BraA06g023770.3C;BraA09g050600.3C;BraA07g024400.3C;BraA01g025310.3C;BraA03g004000.3C;BraA01g034150.3C;BraA03g009230.3C;BraA05g028520.3C;BraA06g020340.3C;BraA02g008420.3C;BraA10g014060.3C;BraA02g011030.3C	0.859757
GO:0005089	Rho guanyl-nucleotide exchange factor activity	molecular_function	BraA07g025500.3C;BraA01g036130.3C;BraA09g033490.3C;BraA01g036120.3C;BraA05g017870.3C;BraA10g028720.3C;BraA01g020500.3C;BraA06g002110.3C;BraA10g033580.3C;BraA10g020780.3C;BraA09g046470.3C	0.861913
[truncated: 227 more rows]

## Sheet: Table S5
Table S5. KEGG pathway analysis of the DMGs in s_bud vs. wt_bud.
Pathway ID	Pathway name	Genes	p value
[truncated: 93 more rows]
